# Supplementary material for: Influence of adsorption thermodynamics on guest diffusivities in nanoporous crystalline materials
Source: Royal Society of Chemistry journal article supplement (doi:10.1039/c3cp50449b), 2013-01-01

*Electronic Supplementary Information (ESI) to accompany:*

# Influence of Adsorption Thermodynamics on Guest Diffusivities in Nanoporous Crystalline Materials

**Rajamani Krishna\* and Jasper M. van Baten**

Van 't Hoff Institute for Molecular Sciences, University of Amsterdam, Science Park 904,  
1098 XH Amsterdam, The Netherlands

\*CORRESPONDING AUTHOR Tel +31 20 6270990; Fax: + 31 20 5255604;

email: [r.krishna@uva.nl](mailto:r.krishna@uva.nl)

## **Listing of Sequence of Figures with data relating diffusivities to adsorption thermodynamics.**

The structural details, pore landscapes, surface area vs pore size distributions, CBMC and MD simulation results, along with available experimental data. The data for each material are arranged and presented in the accompanying Figures in the following order.

### **Cage-type structures with narrow windows**

For cage-type zeolites, the accompanying Figures demonstrate the validity of the QC model to describe the loading dependence of CH<sub>4</sub>.

CHA

DDR

ERI

ITQ-29

LTA-Si (all-silica)

LTA-4A

LTA-5A

SOD-Si (all silica)

TSC

ZIF-8: In this case, experimental data on diffusivities obtained from Leipzig using Infra-Red Microscopy are presented to demonstrate the influence of molecular clustering.

### **1D meso-porous channels**

BTP-COF

### **1D micro-porous channels**

For 1D microporous channels, the data comparing the loading dependence of diffusivities with the inverse thermodynamic factor for variety of guest molecules are presented for the following structures.

AFI

MTW

TON

MgMOF-74

ZnMOF-74

NiMOF-74

FeMOF-74

CoMOF-74

MIL-47

MIL-53(Cr)-lp

### **1D micro-porous channels with side pockets**

For MOR, the accompanying Figures present data comparing the loading dependence of diffusivities with the inverse thermodynamic factor for variety of guest molecules.

MOR

### **“Open” structures with large cavities**

For each structure listed below, the accompanying Figures present data comparing the loading dependence of diffusivities with the inverse thermodynamic factor for variety of guest molecules.

FAU-Si

NaY

NaX

CuBTC

IRMOF-1

MOF-177

### **Intersecting channels**

For each structure listed below, the accompanying Figures present data comparing the loading dependence of diffusivities with the inverse thermodynamic factor for variety of guest molecules.

BEA

BOG

FER

ISV

MFI

Zn(bdc)dabco

# **Cage-type structures with narrow windows**

# CHA landscape

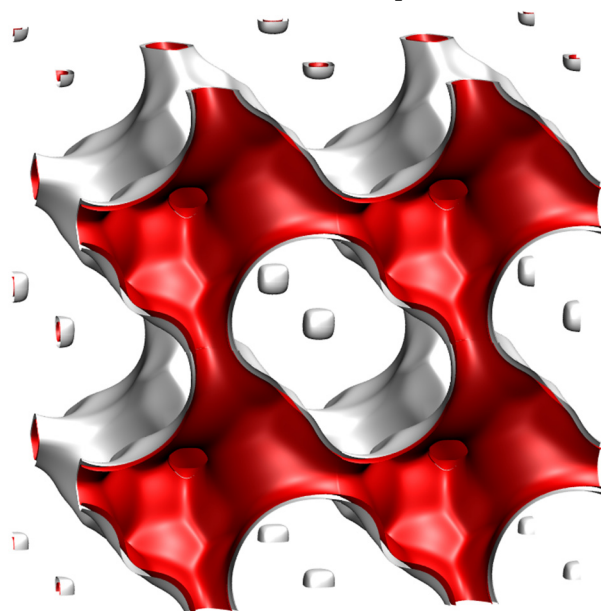

There are 6 cages per unit cell.  
The volume of one CHA cage is  $316.4 \text{ \AA}^3$ , slightly larger than that of a single cage of DDR ( $278 \text{ \AA}^3$ ), but significantly lower than FAU ( $786 \text{ \AA}^3$ ).

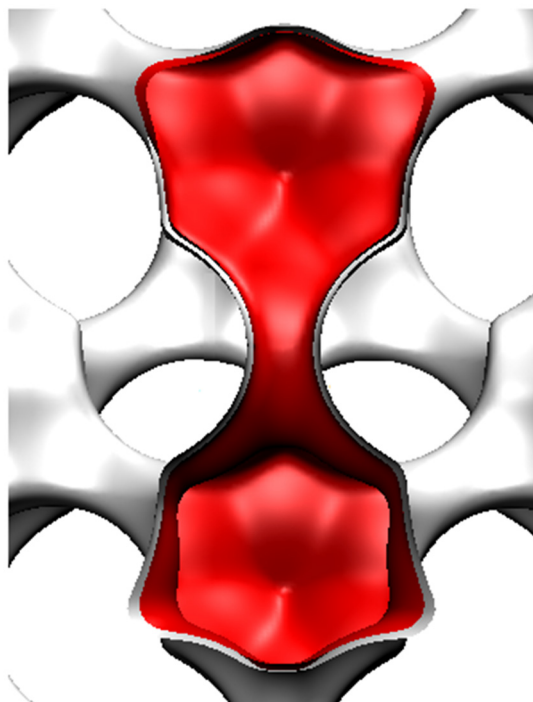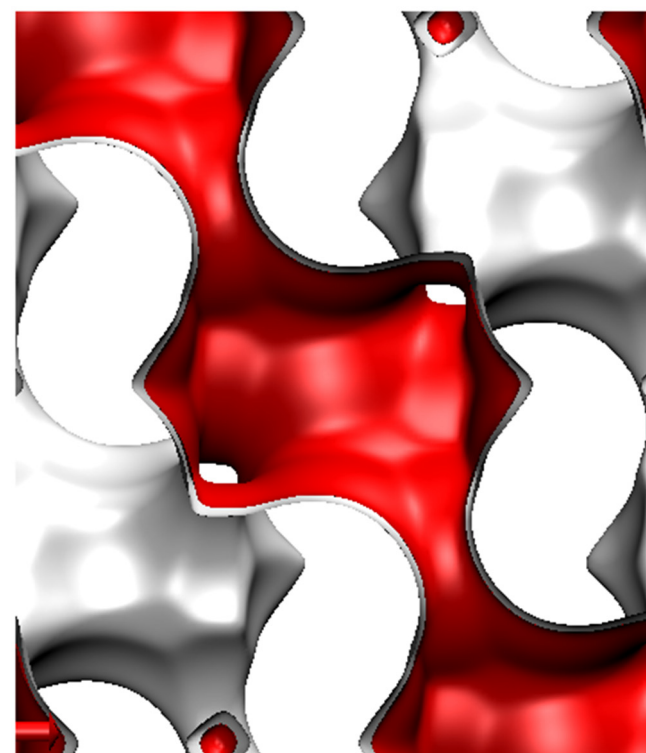

Snapshots  
showing location  
of  $\text{CH}_4$

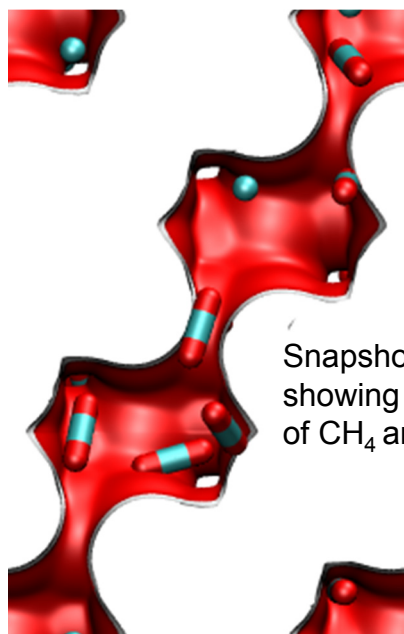

Snapshots  
showing location  
of  $\text{CH}_4$  and  $\text{CO}_2$

Structural information from: C. Baerlocher, L.B. McCusker, Database of Zeolite Structures, International Zeolite Association, <http://www.iza-structure.org/databases/>

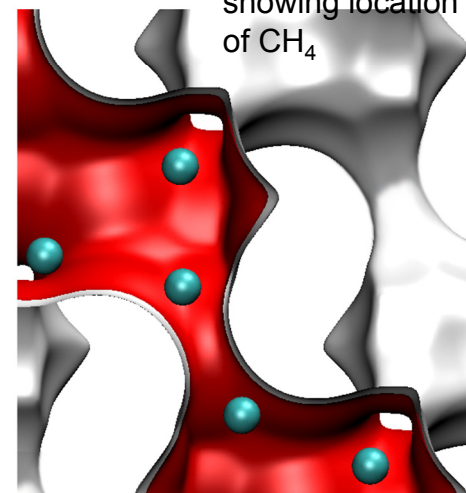

# CHA window and pore dimensions

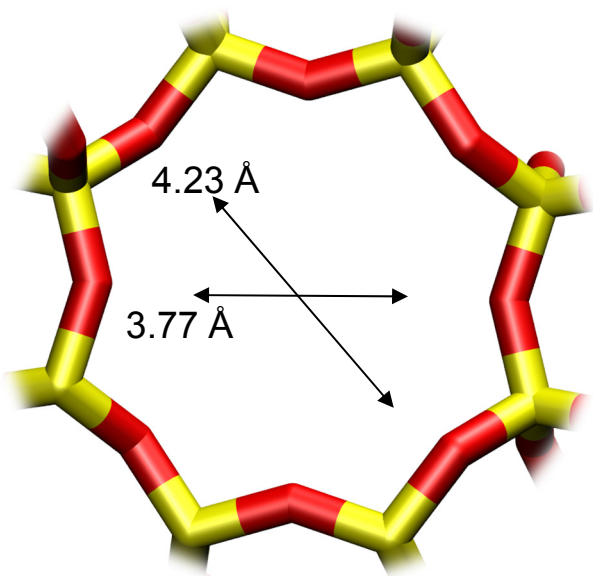

CHA

The window dimensions calculated using the van der Waals diameter of framework atoms = 2.7 Å are indicated above by the arrows.

This plot of surface area versus pore dimension is determined using a combination of the DeLaunay triangulation method for pore dimension determination, and the procedure of Dürren for determination of the surface area.

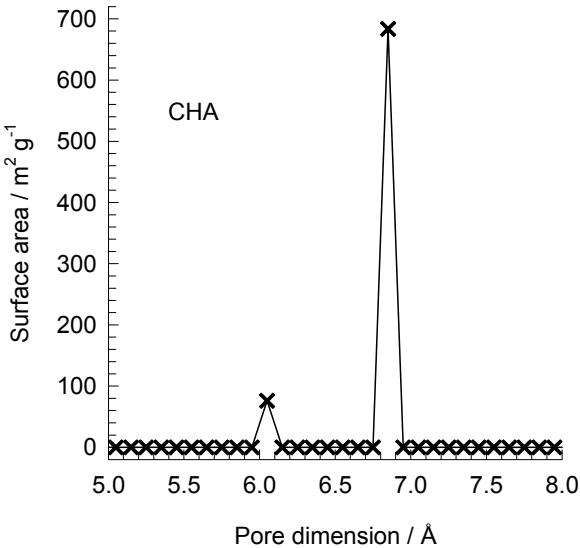

|                                                            | CHA      |
|------------------------------------------------------------|----------|
| <i>a</i> / Å                                               | 15.075   |
| <i>b</i> / Å                                               | 23.907   |
| <i>c</i> / Å                                               | 13.803   |
| Cell volume / Å³                                           | 4974.574 |
| conversion factor for [molec/uc] to [mol per kg Framework] | 0.2312   |
| conversion factor for [molec/uc] to [kmol/m³]              | 0.8747   |
| $\rho$ [kg/m³]                                             | 1444.1   |
| MW unit cell [g/mol(framework)]                            | 4326.106 |
| $\phi$ , fractional pore volume                            | 0.382    |
| open space / Å³/uc                                         | 1898.4   |
| Pore volume / cm³/g                                        | 0.264    |
| Surface area / m²/g                                        | 758.0    |
| DeLaunay diameter / Å                                      | 3.77     |

# CHA CBMC simulations of isotherms, and isosteric heats of adsorption

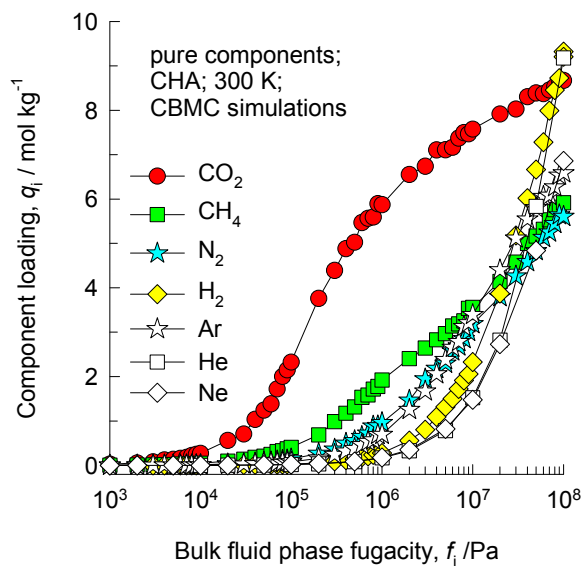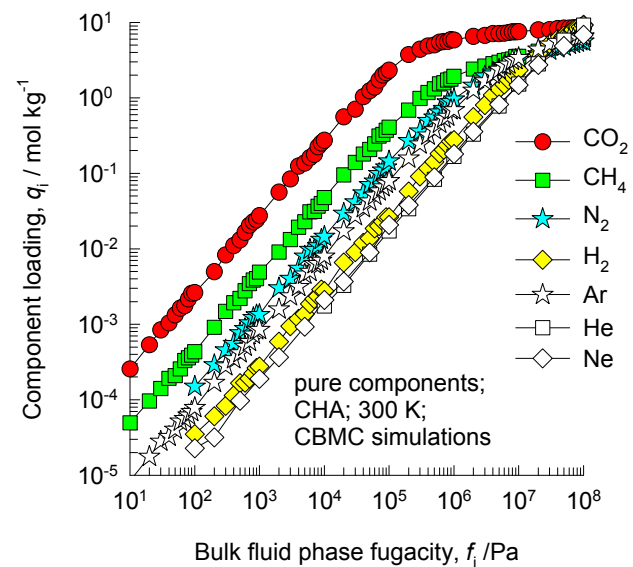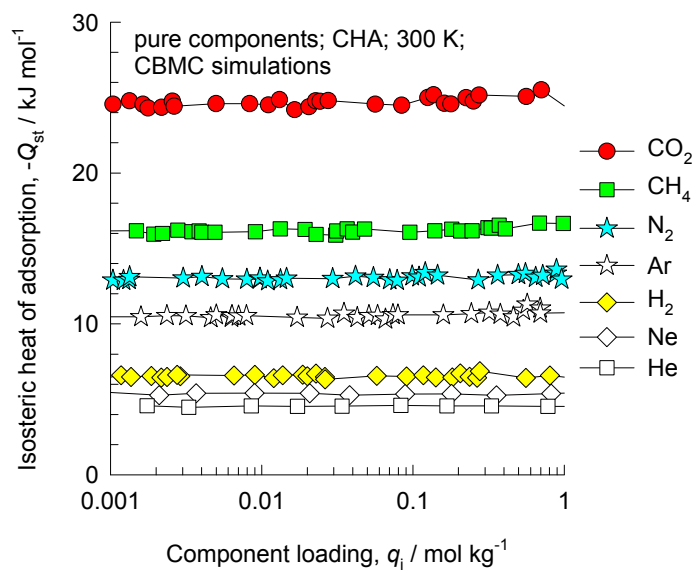

# CHA MD simulations of unary self-, and M-S diffusivities

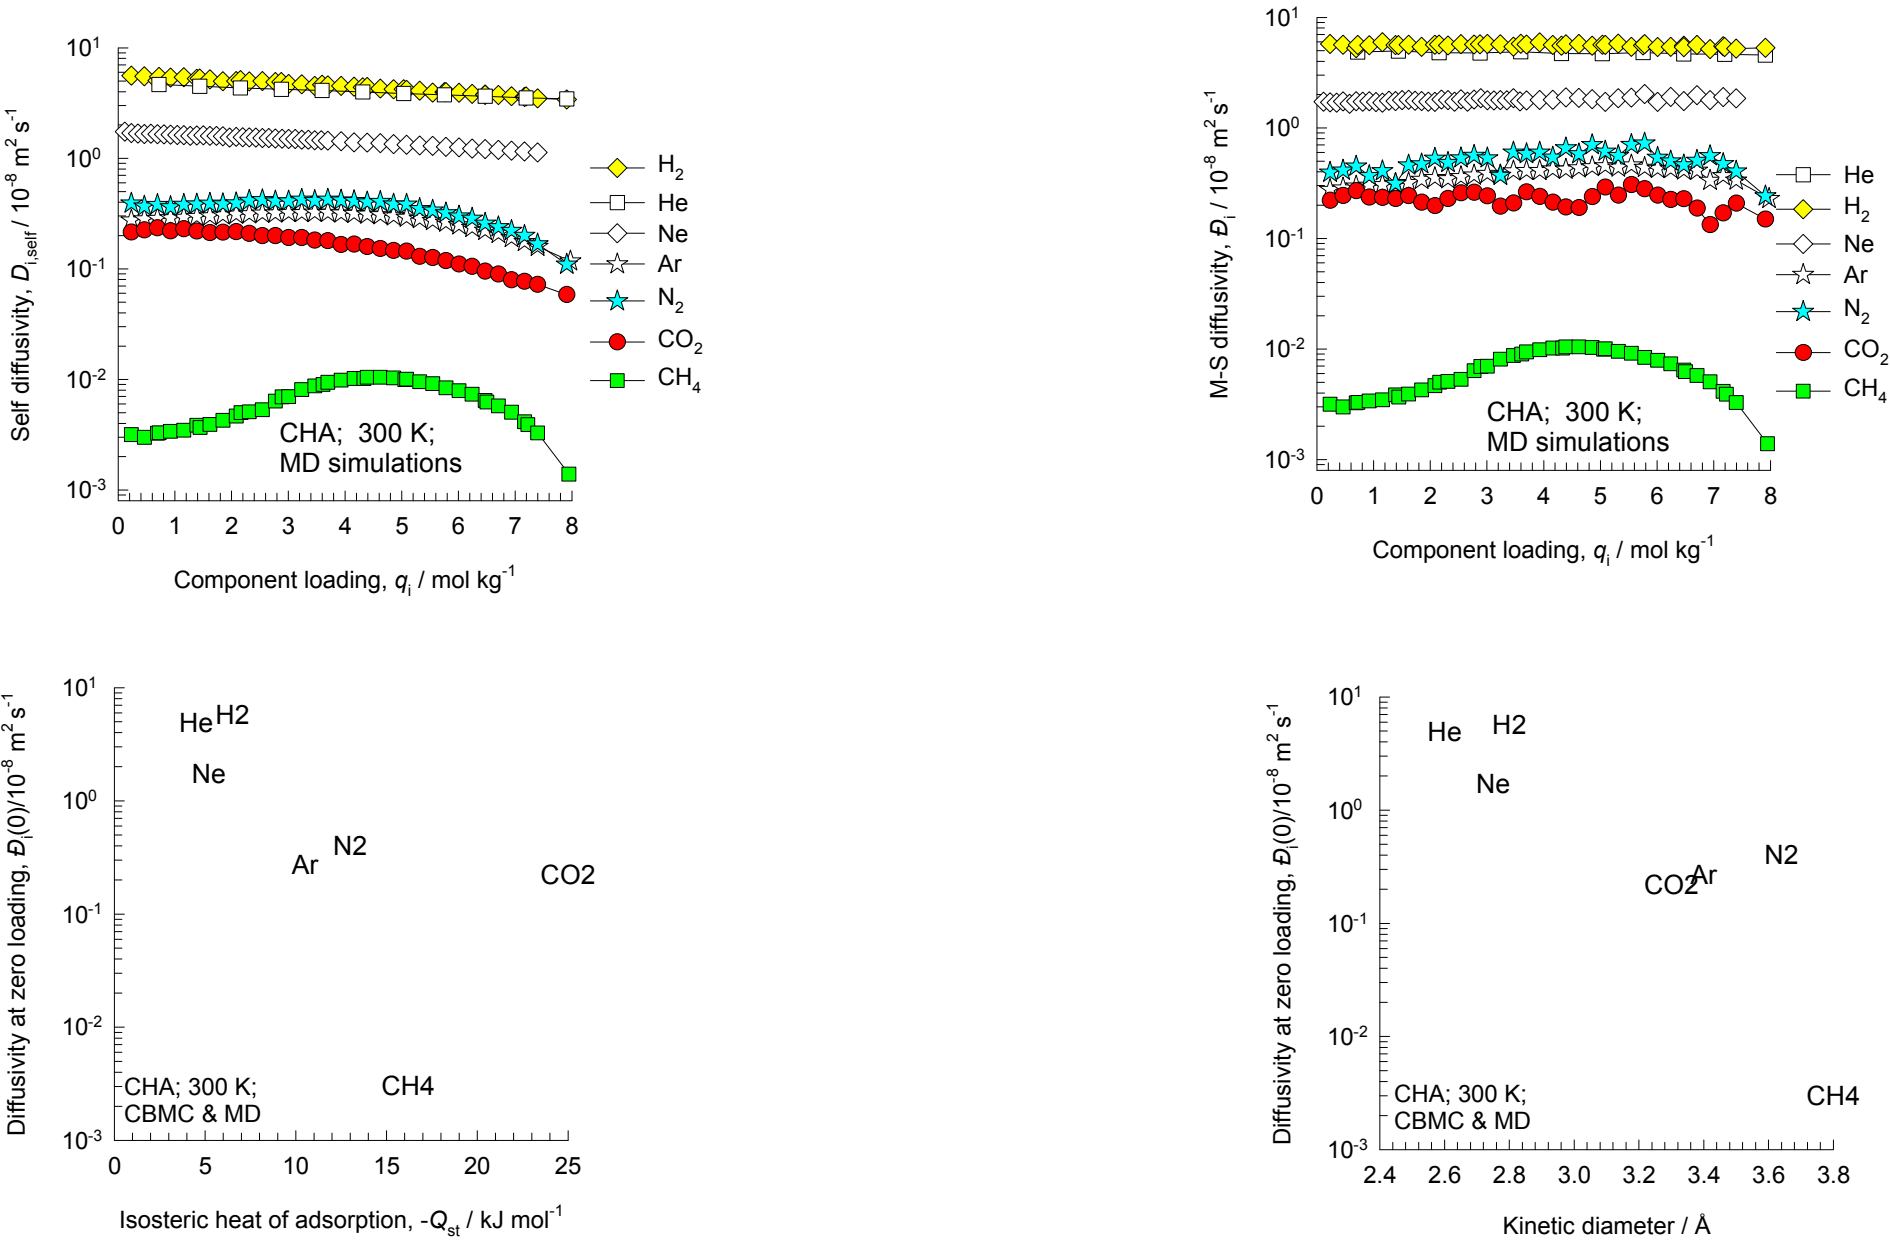

# CHA Modeling the loading dependence of CH<sub>4</sub> diffusivity

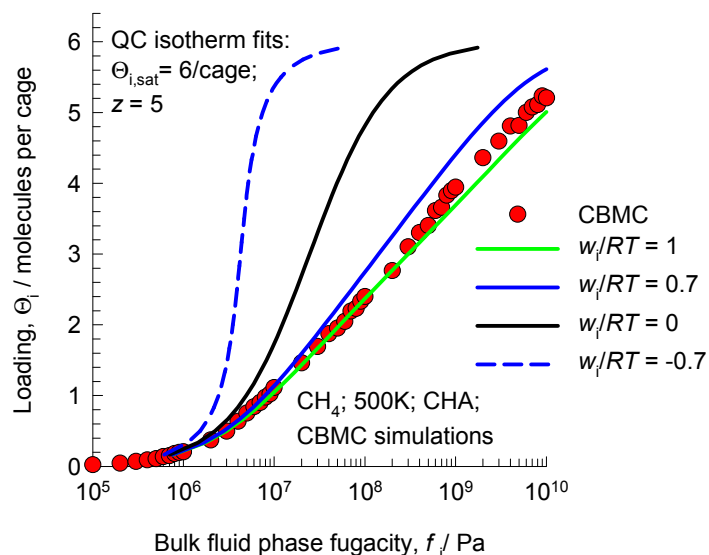

Quasi - Chemical isotherm

$$b_i f_i = \frac{\theta_i}{(1-\theta_i)} \left( \frac{2(1-\theta_i)}{\zeta_i + 1 - 2\theta_i} \right)^z$$

$$\theta_i = c_i / c_{i,sat} = q_i / q_{i,sat} = \Theta_i / \Theta_{i,sat}$$

$$\zeta_i = \sqrt{1 - 4\theta_i(1-\theta_i)(1 - \exp(-w_i/RT))}$$

$$\Gamma_i = \frac{1}{(1-\theta_i)} \left( 1 + \frac{z}{2} \frac{(1-\zeta_i)}{\zeta_i} \right)$$

Krishna, Paschek and Baur (2004) model

$$D_i = D_i(0) \left( \frac{1 + \zeta_i}{2(1-\theta_i)} \right)^{-z} \left( 1 + \frac{(\zeta_i - 1 + 2\theta_i) \exp(w_i/RT)}{2(1-\theta_i)} \right)^{z-1}$$

$$\zeta_i = \sqrt{1 - 4\theta_i(1-\theta_i)(1 - \exp(-w_i/RT))}$$

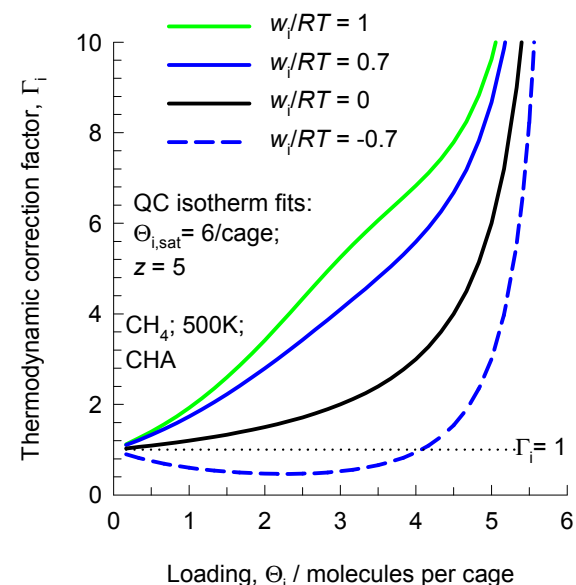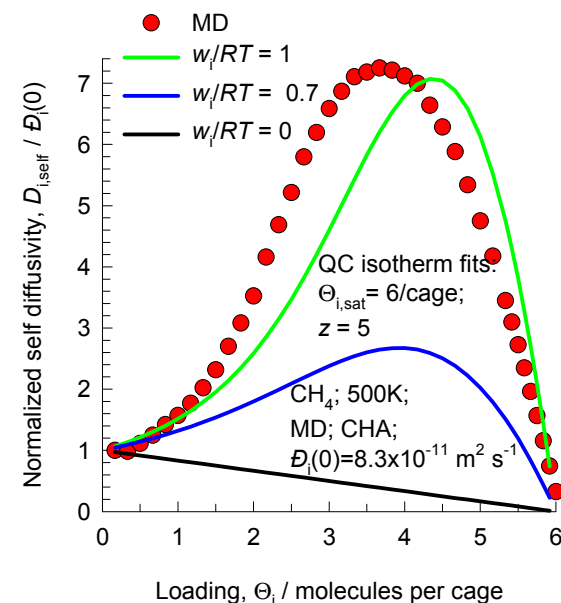

The model used to describe the concentration dependence of  $D_i$  is described in detail in Krishna, R.; Paschek, D.; Baur, R. Modelling the occupancy dependence of diffusivities in zeolites, Microporous Mesoporous Mater. 2004, 76, 233-246.

# CHA: Transient uptake of methanol – ethanol mixture

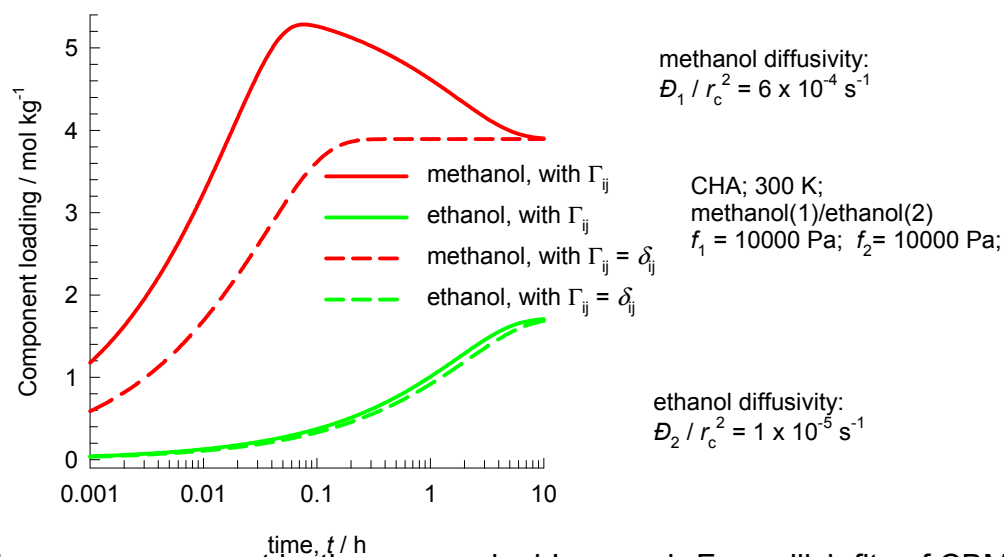

In these simulations, both the M-S diffusivities are assumed to be independent of loading. The overshoot in methanol is not, therefore, a result of the loading dependence of its M-S diffusivity.

The pure component isotherms are dual-Langmuir-Freundlich fits of CBMC simulated pure component isotherms of alcohols in CHA available in Krishna, R.; van Baten, J. M. Entropy-based separation of linear chain molecules by exploiting differences in the saturation capacities in cage-type zeolites, Sep. Purif. Technol. 2011, 76, 325-330.

The overshoot in the methanol uptake is a direct consequence of thermodynamic coupling caused by the off-diagonal elements of

$$\begin{bmatrix} \Gamma_{11} & \Gamma_{12} \\ \Gamma_{21} & \Gamma_{21} \end{bmatrix} \quad \text{where} \quad \Gamma_{ij} = \frac{q_i}{f_i} \frac{\partial f_i}{\partial q_j}$$

If the thermodynamic coupling is ignored, i.e. we assume  $\Gamma_i = \delta_{ij}$ ; Kronecker delta

$$\begin{bmatrix} \Gamma_{11} & \Gamma_{12} \\ \Gamma_{21} & \Gamma_{21} \end{bmatrix} = \begin{bmatrix} 1 & 0 \\ 0 & 1 \end{bmatrix}$$

the methanol overshoot disappears.

# CHA: Transient uptake of methanol – 1-propanol mixture

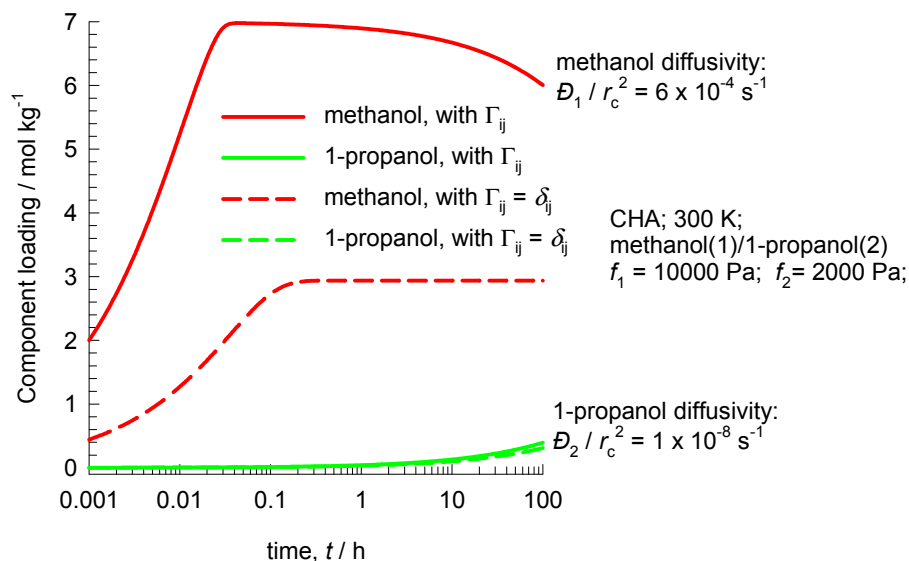

In these simulations, both the M-S diffusivities are assumed to be independent of loading. The overshoot in methanol is not, therefore, a result of the loading dependence of its M-S diffusivity.

The pure component isotherms are dual-Langmuir-Freundlich fits of CBMC simulated pure component isotherms of alcohols in CHA available in

Krishna, R.; van Baten, J. M. Entropy-based separation of linear chain molecules by exploiting differences in the saturation capacities in cage-type zeolites, *Sep. Purif. Technol.* 2011, 76, 325-330.

The overshoot in the methanol uptake is a direct consequence of thermodynamic coupling caused by the off-diagonal elements of

$$\begin{bmatrix} \Gamma_{11} & \Gamma_{12} \\ \Gamma_{21} & \Gamma_{21} \end{bmatrix} \quad \text{where} \quad \Gamma_{ij} = \frac{q_i}{f_i} \frac{\partial f_i}{\partial q_j}$$

If the thermodynamic coupling is ignored, i.e. we assume  $\Gamma_i = \delta_{ij}$ ; Kronecker delta

$$\begin{bmatrix} \Gamma_{11} & \Gamma_{12} \\ \Gamma_{21} & \Gamma_{21} \end{bmatrix} = \begin{bmatrix} 1 & 0 \\ 0 & 1 \end{bmatrix}$$

the methanol overshoot disappears.

# CHA: Transient uptake of ethanol – 1-propanol mixture

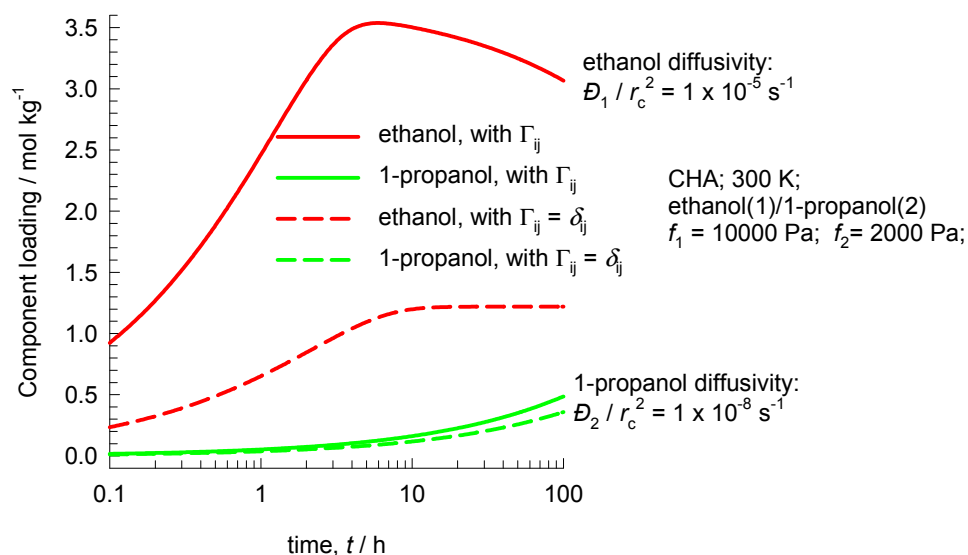

In these simulations, both the M-S diffusivities are assumed to be independent of loading. The overshoot in ethanol is not, therefore, a result of the loading dependence of its M-S diffusivity.

The pure component isotherms are dual-Langmuir-Freundlich fits of CBMC simulated pure component isotherms of alcohols in CHA available in

Krishna, R.; van Baten, J. M. Entropy-based separation of linear chain molecules by exploiting differences in the saturation capacities in cage-type zeolites, *Sep. Purif. Technol.* 2011, 76, 325-330.

The overshoot in the ethanol uptake is a direct consequence of thermodynamic coupling caused by the off-diagonal elements of

$$\begin{bmatrix} \Gamma_{11} & \Gamma_{12} \\ \Gamma_{21} & \Gamma_{21} \end{bmatrix} \quad \text{where} \quad \Gamma_{ij} = \frac{q_i}{f_i} \frac{\partial f_i}{\partial q_j}$$

If the thermodynamic coupling is ignored, i.e. we assume  $\Gamma_i = \delta_{ij}$ ; Kronecker delta

$$\begin{bmatrix} \Gamma_{11} & \Gamma_{12} \\ \Gamma_{21} & \Gamma_{21} \end{bmatrix} = \begin{bmatrix} 1 & 0 \\ 0 & 1 \end{bmatrix}$$

the ethanol overshoot disappears.

# DDR landscape

There are 12 cages per unit cell.  
The volume of one DDR cage is  $278 \text{ \AA}^3$ , significantly smaller than that of a single cage of FAU ( $786 \text{ \AA}^3$ ), or ZIF-8 ( $1168 \text{ \AA}^3$ ).

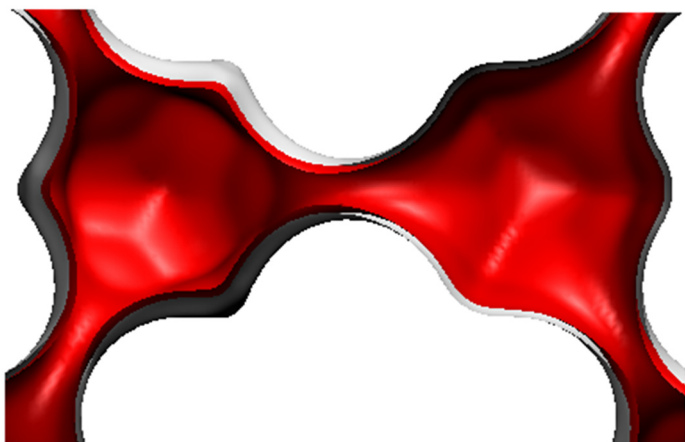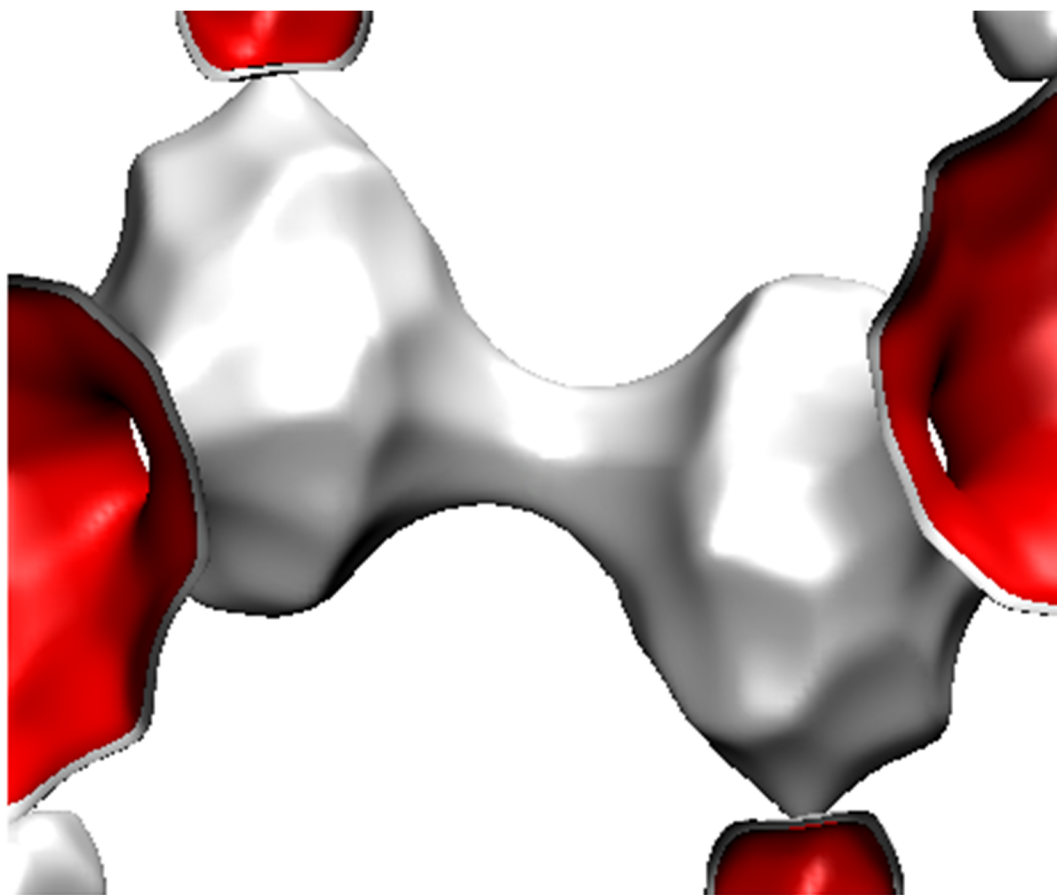

Structural information from: C. Baerlocher, L.B. McCusker, Database of Zeolite Structures, International Zeolite Association, <http://www.iza-structure.org/databases/>

To convert from molecules per unit cell to mol kg<sup>-1</sup>, multiply by 0.06936.  
The pore volume is 0.182 cm<sup>3</sup>/g.

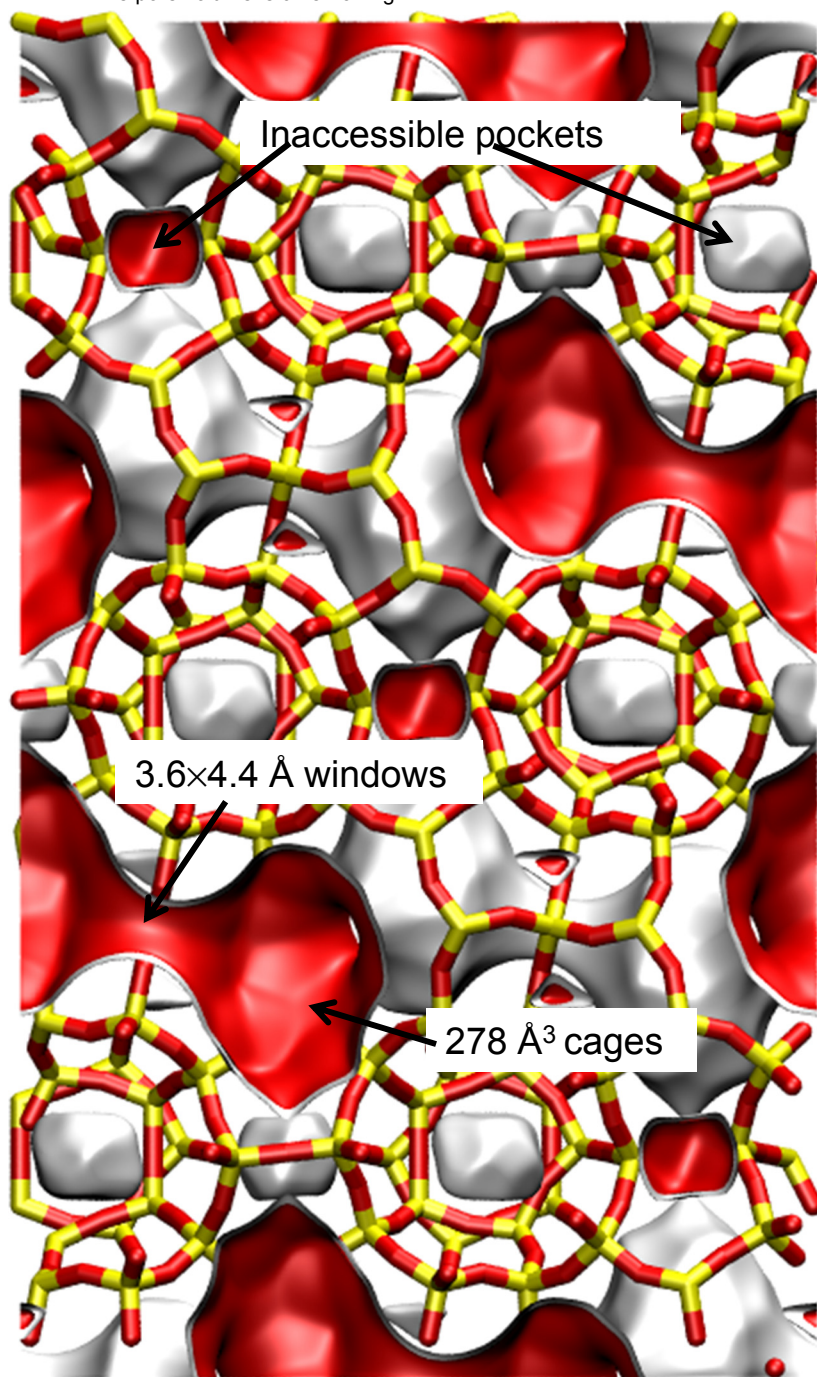

## DDR landscapes without blocking

In all our simulations the inaccessible pockets of DDR were blocked. This aspect is explained in our paper  
R. Krishna and J.M. van Baten, Comment on Comparative Molecular Simulation Study of CO<sub>2</sub>/N<sub>2</sub> and CH<sub>4</sub>/N<sub>2</sub> Separation in Zeolites and Metal-Organic Frameworks, *Langmuir*, 26 (2010) 2975-2978

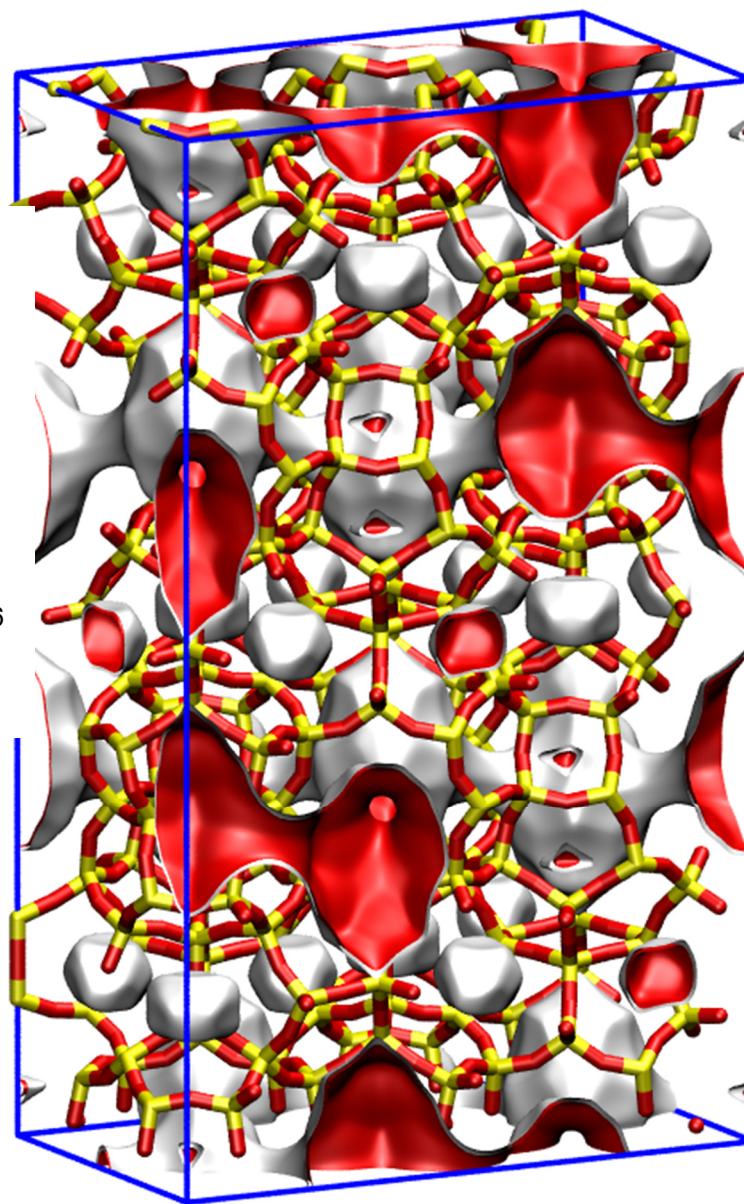

# DDR window and pore dimensions

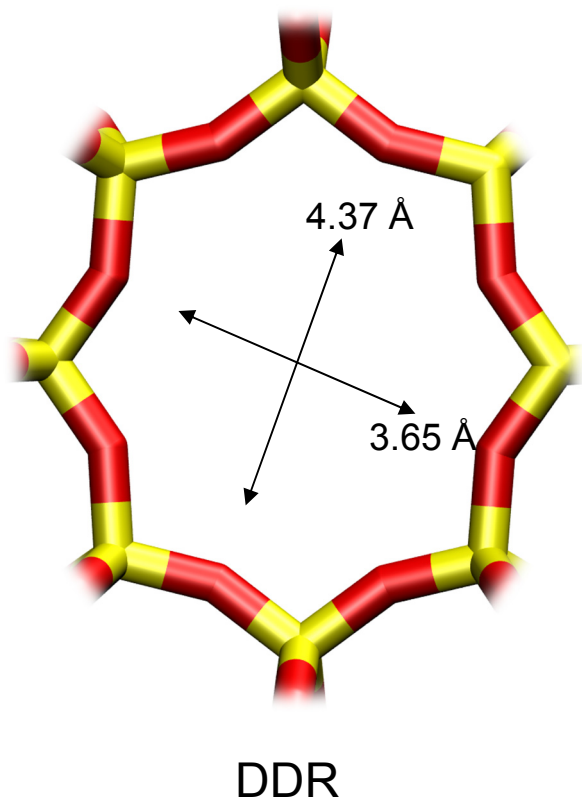

The window dimensions calculated using the van der Waals diameter of framework atoms = 2.7 Å are indicated above by the arrows.

This plot of surface area versus pore dimension is determined using a combination of the DeLaunay triangulation method for pore dimension determination, and the procedure of Dürren for determination of the surface area.

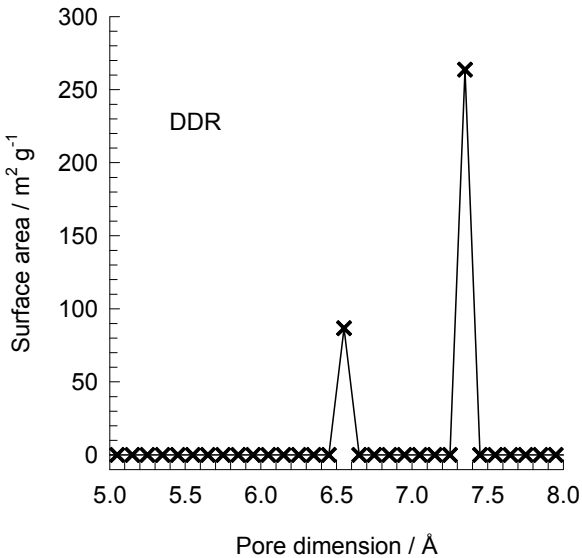

|                                                            | DDR      |
|------------------------------------------------------------|----------|
| <i>a</i> / Å                                               | 24.006   |
| <i>b</i> / Å                                               | 13.86    |
| <i>c</i> / Å                                               | 40.892   |
| Cell volume / Å³                                           | 13605.72 |
| conversion factor for [molec/uc] to [mol per kg Framework] | 0.0693   |
| conversion factor for [molec/uc] to [kmol/m³]              | 0.4981   |
| $\rho$ [kg/m³]                                             | 1759.991 |
| MW unit cell [g/mol(framework)]                            | 14420.35 |
| $\phi$ , fractional pore volume                            | 0.245    |
| open space / Å³/uc                                         | 3333.5   |
| Pore volume / cm³/g                                        | 0.139    |
| Surface area / m²/g                                        | 350.0    |
| DeLaunay diameter / Å                                      | 3.65     |

# DDR CBMC simulations of isotherms, and isosteric heats of adsorption

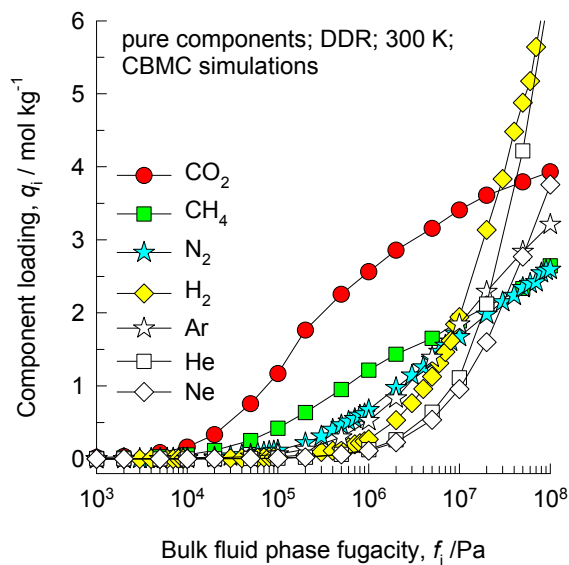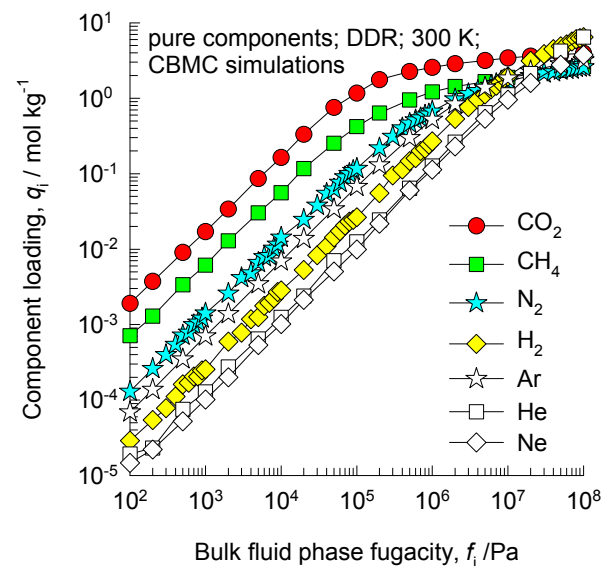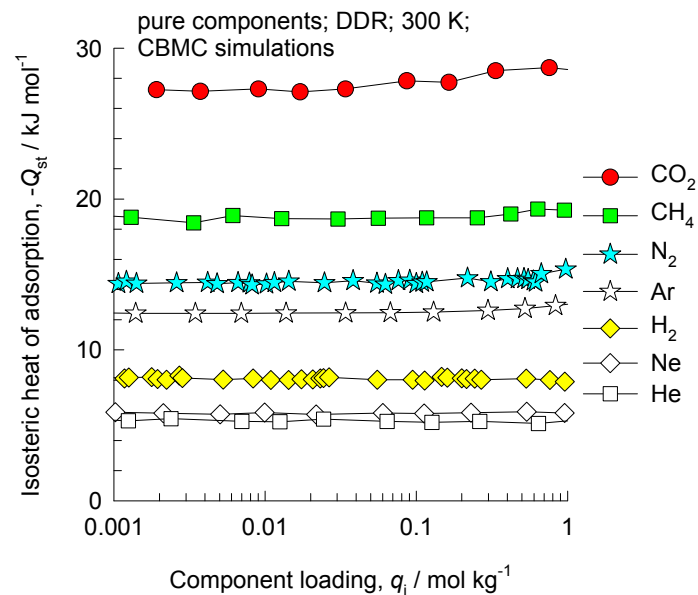

# DDR Modeling the loading dependence of CH<sub>4</sub> diffusivity

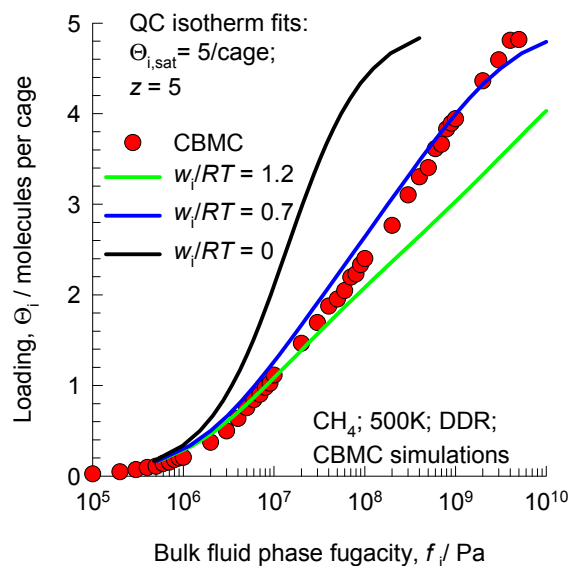

Quasi - Chemical isotherm

$$b_i f_i = \frac{\theta_i}{(1-\theta_i)} \left( \frac{2(1-\theta_i)}{\zeta_i + 1 - 2\theta_i} \right)^z$$

$$\theta_i = c_i / c_{i,sat} = q_i / q_{i,sat} = \Theta_i / \Theta_{i,sat}$$

$$\zeta_i = \sqrt{1 - 4\theta_i(1-\theta_i)(1 - \exp(-w_i/RT))}$$

$$\Gamma_i = \frac{1}{(1-\theta_i)} \left( 1 + \frac{z}{2} \frac{(1-\zeta_i)}{\zeta_i} \right)$$

Krishna, Paschek and Baur (2004) model

$$D_i = D_i(0) \left( \frac{1+\zeta_i}{2(1-\theta_i)} \right)^{-z} \left( 1 + \frac{(\zeta_i - 1 + 2\theta_i)\exp(w_i/RT)}{2(1-\theta_i)} \right)^{z-1}$$

$$\zeta_i = \sqrt{1 - 4\theta_i(1-\theta_i)(1 - \exp(-w_i/RT))}$$

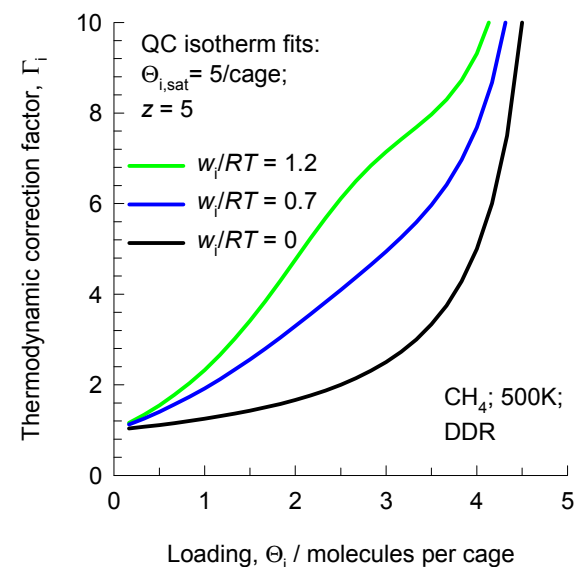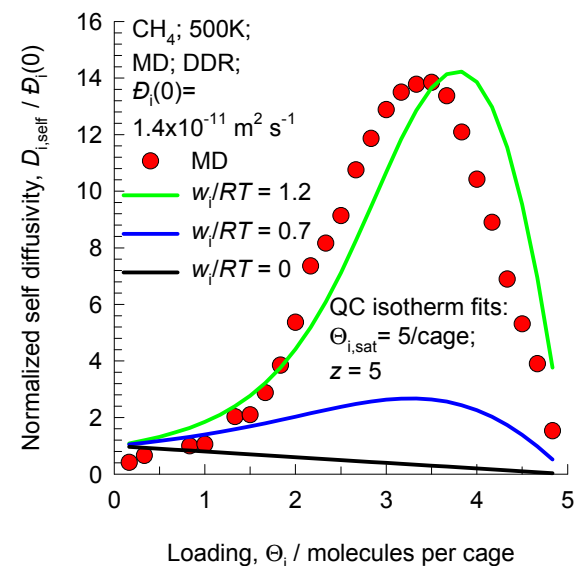

The model used to describe the concentration dependence of  $D_i$  is described in detail in Krishna, R.; Paschek, D.; Baur, R. Modelling the occupancy dependence of diffusivities in zeolites, Microporous Mesoporous Mater. 2004, 76, 233-246.

# ERI pore landscape

There are 4 cages per unit cell.  
The volume of one ERI cage is  $408.7 \text{ \AA}^3$ ,  
significantly smaller than that of a single cage  
of FAU-Si ( $786 \text{ \AA}^3$ ), or ZIF-8 ( $1168 \text{ \AA}^3$ ).

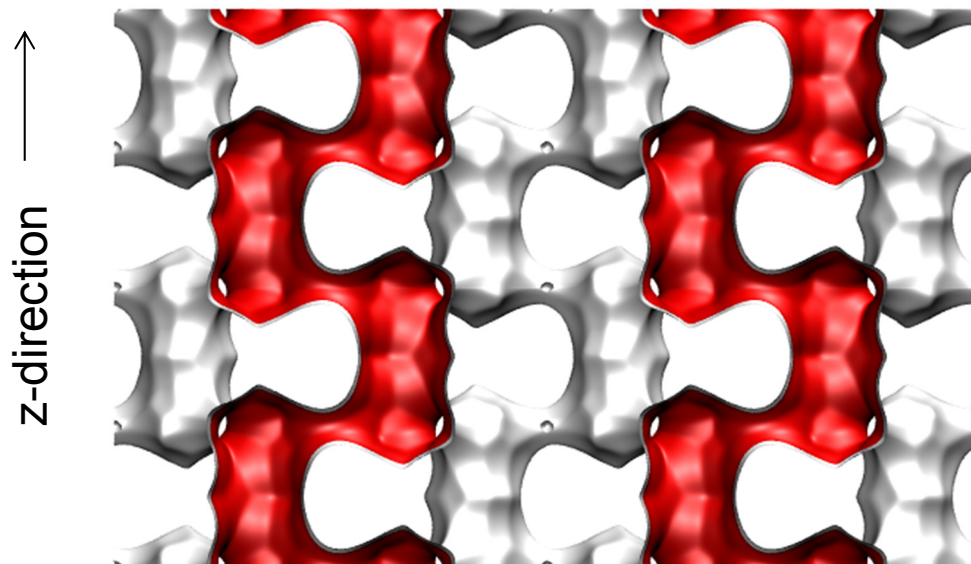

x-y projection

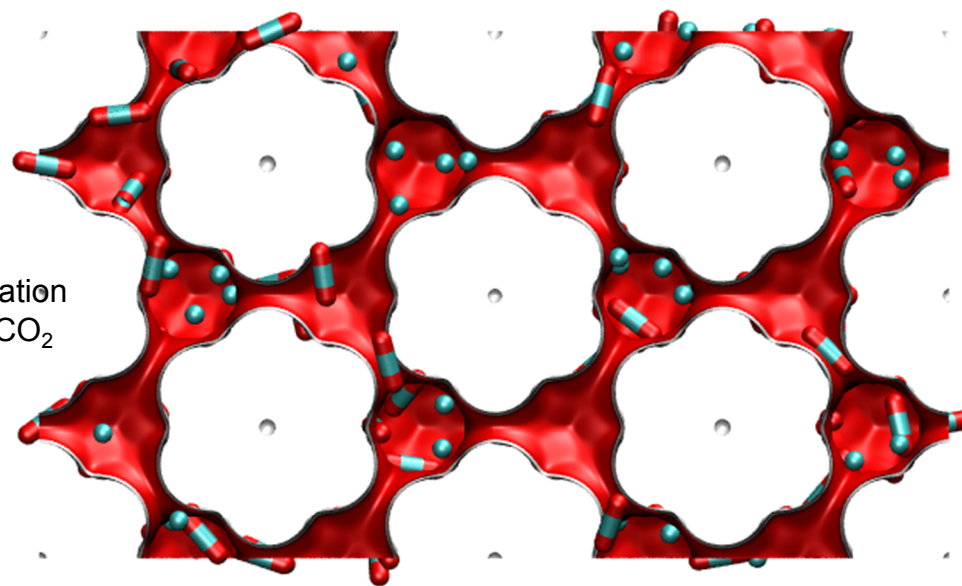

Snapshots  
showing location  
of  $\text{CH}_4$  and  $\text{CO}_2$

Structural information from: C. Baerlocher, L.B. McCusker, Database of Zeolite Structures, International Zeolite Association, <http://www.iza-structure.org/databases/>

# ERI window and pore dimensions

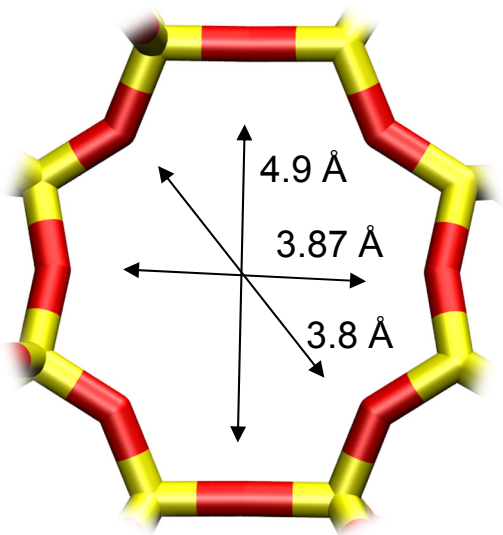

ERI

The window dimensions calculated using the van der Waals diameter of framework atoms = 2.7 Å are indicated above by the arrows.

This plot of surface area versus pore dimension is determined using a combination of the DeLaunay triangulation method for pore dimension determination, and the procedure of Dürren for determination of the surface area.

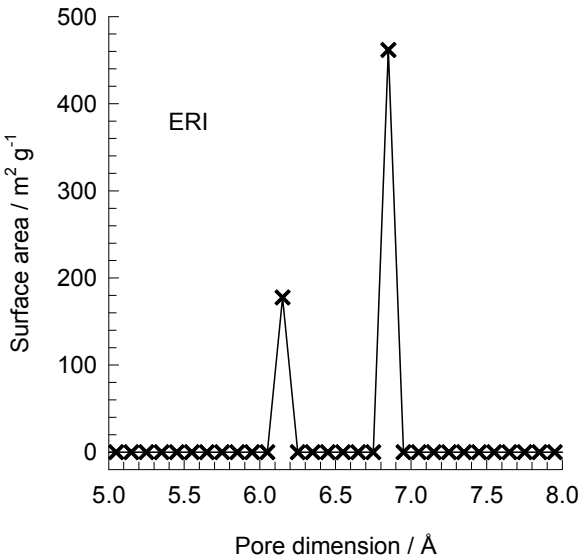

|                                                            | ERI      |
|------------------------------------------------------------|----------|
| <i>a</i> /Å                                                | 22.953   |
| <i>b</i> /Å                                                | 13.252   |
| <i>c</i> /Å                                                | 14.81    |
| Cell volume / Å³                                           | 4504.804 |
| conversion factor for [molec/uc] to [mol per kg Framework] | 0.2312   |
| conversion factor for [molec/uc] to [kmol/m³]              | 1.0156   |
| $\rho$ [kg/m3]                                             | 1594.693 |
| MW unit cell [g/mol(framework)]                            | 4326.106 |
| $\phi$ , fractional pore volume                            | 0.363    |
| open space / Å³/uc                                         | 1635.0   |
| Pore volume / cm³/g                                        | 0.228    |
| Surface area /m²/g                                         | 635.0    |
| DeLaunay diameter /Å                                       | 3.81     |

# ERI MD simulations of unary self- diffusivities

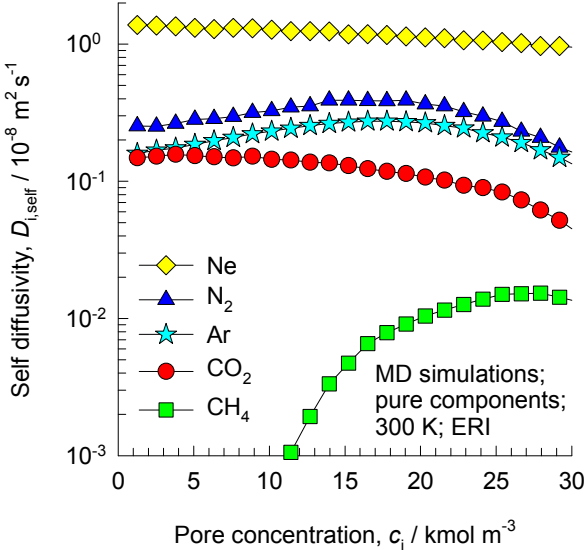

## ITQ-29 pore landscape

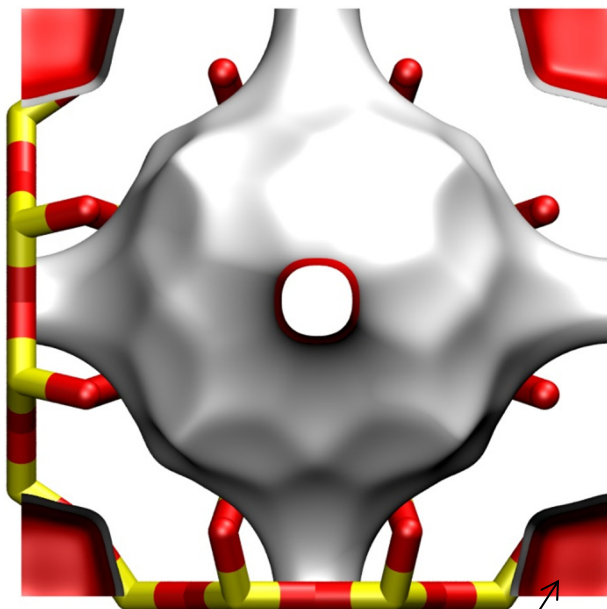

Inaccessible  
sodalite cages  
have been  
blocked in  
these  
simulations

There is 1 cage per unit cell.  
The volume of one ITQ-29 cage is  
 $677.6 \text{ \AA}^3$ , intermediate in size  
between a single cage of ZIF-8  
( $1168 \text{ \AA}^3$ ) and of DDR ( $278 \text{ \AA}^3$ ).

The structural information for ITQ-29 is not available in the IZA  
atlas and is taken from Corma, Nature, 437 (2004) 287. The  
window size is slightly smaller than that of LTA Si.

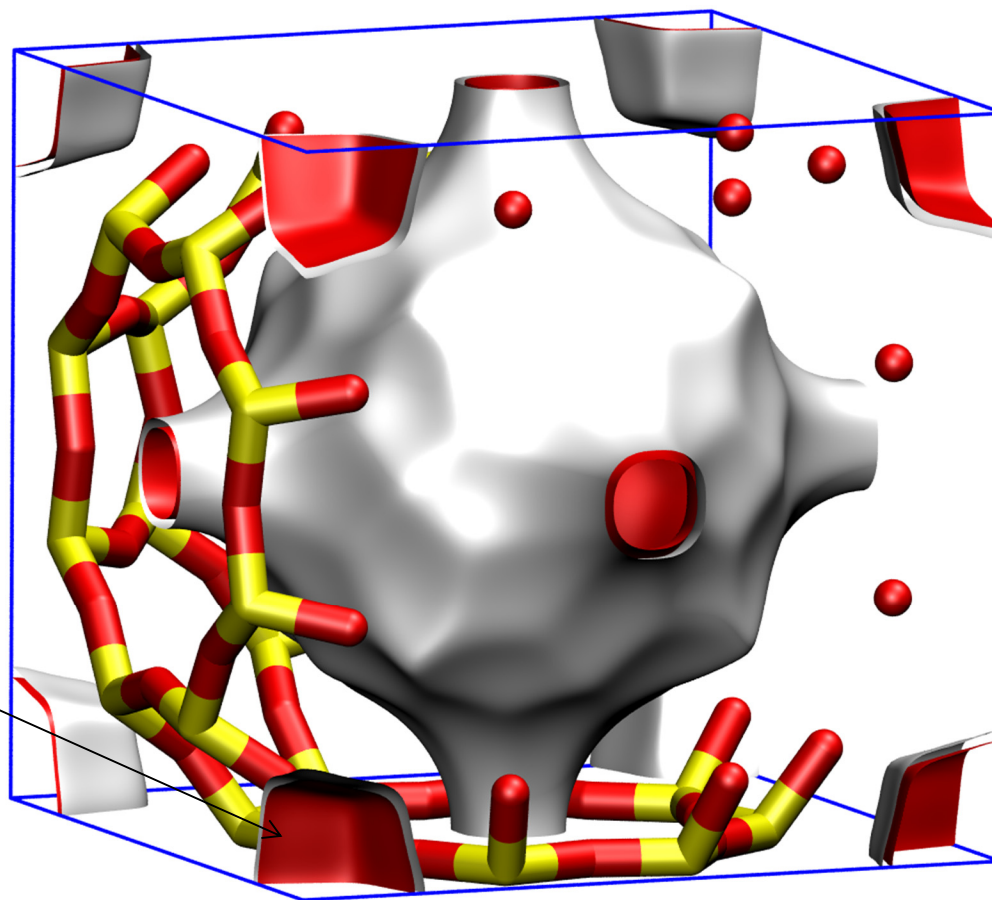

# ITQ-29 window and pore dimensions

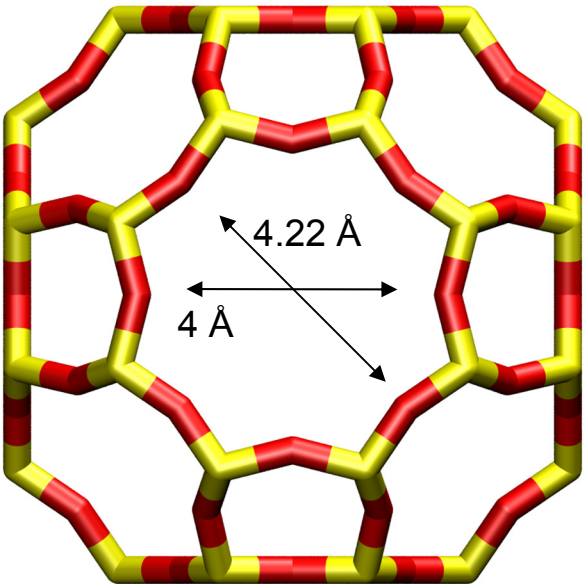

The window dimension calculated using the van der Waals diameter of framework atoms = 2.7 Å is indicated above by the arrows.

This plot of surface area versus pore dimension is determined using a combination of the DeLaunay triangulation method for pore dimension determination, and the procedure of Dürren for determination of the surface area.

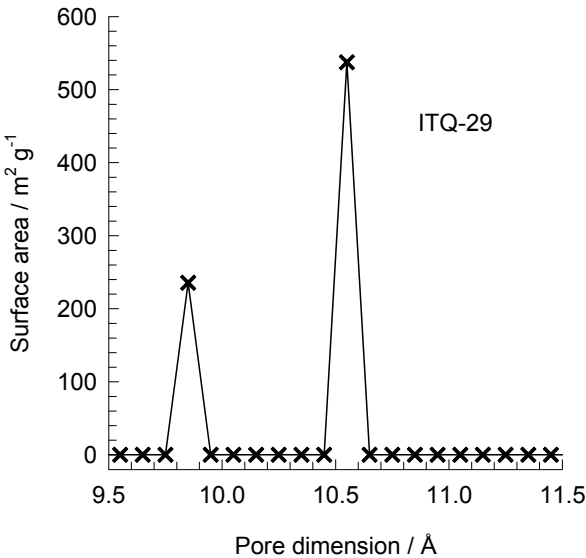

|                                                            | ITQ-29   |
|------------------------------------------------------------|----------|
| <i>a</i> /Å                                                | 11.867   |
| <i>b</i> /Å                                                | 11.867   |
| <i>c</i> /Å                                                | 11.867   |
| Cell volume / Å³                                           | 1671.178 |
| conversion factor for [molec/uc] to [mol per kg Framework] | 0.6935   |
| conversion factor for [molec/uc] to [kmol/m³]              | 2.4508   |
| $\rho$ [kg/m3]                                             | 1432.877 |
| MW unit cell [g/mol(framework)]                            | 1442.035 |
| $\phi$ , fractional pore volume                            | 0.405    |
| open space / Å³/uc                                         | 677.6    |
| Pore volume / cm³/g                                        | 0.283    |
| Surface area /m²/g                                         | 773.0    |
| DeLaunay diameter /Å                                       | 3.98     |

# ITQ-29 MD simulations of unary self- diffusivities

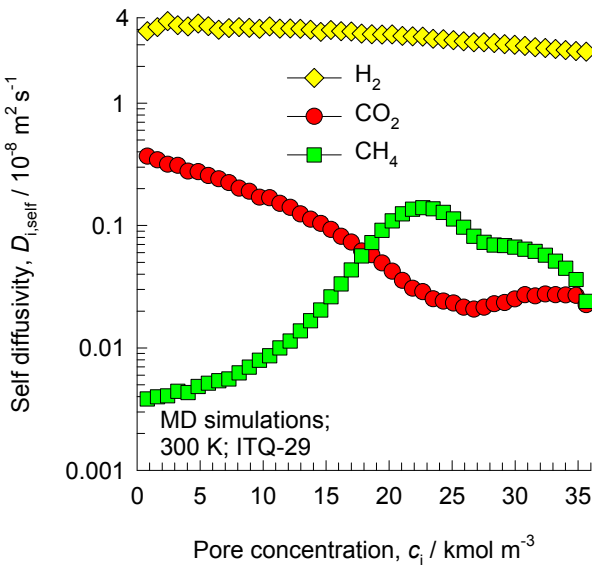

# ITQ-29 Modeling the loading dependence of CH<sub>4</sub> diffusivity

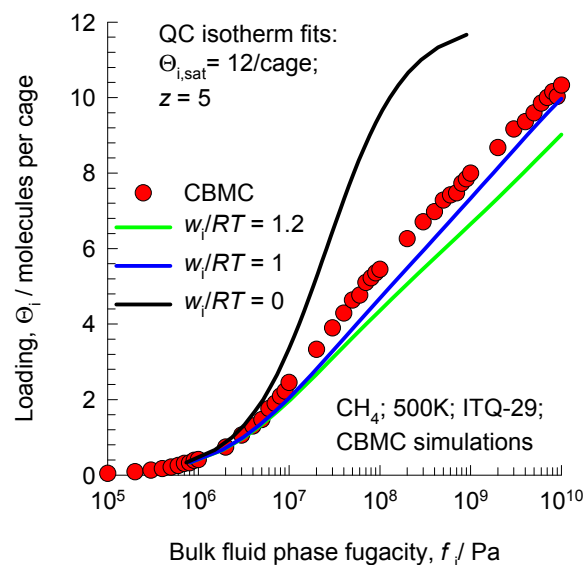

Quasi - Chemical isotherm

$$b_i f_i = \frac{\theta_i}{(1 - \theta_i)} \left( \frac{2(1 - \theta_i)}{\zeta_i + 1 - 2\theta_i} \right)^z$$

$$\theta_i = c_i / c_{i,sat} = q_i / q_{i,sat} = \Theta_i / \Theta_{i,sat}$$

$$\zeta_i = \sqrt{1 - 4\theta_i(1 - \theta_i)(1 - \exp(-w_i/RT))}$$

$$\Gamma_i = \frac{1}{(1 - \theta_i)} \left( 1 + \frac{z(1 - \zeta_i)}{\zeta_i} \right)$$

Krishna, Paschek and Baur (2004) model

$$D_i = D_i(0) \left( \frac{1 + \zeta_i}{2(1 - \theta_i)} \right)^{-z} \left( 1 + \frac{(\zeta_i - 1 + 2\theta_i) \exp(w_i/RT)}{2(1 - \theta_i)} \right)^{z-1}$$

$$\zeta_i = \sqrt{1 - 4\theta_i(1 - \theta_i)(1 - \exp(-w_i/RT))}$$

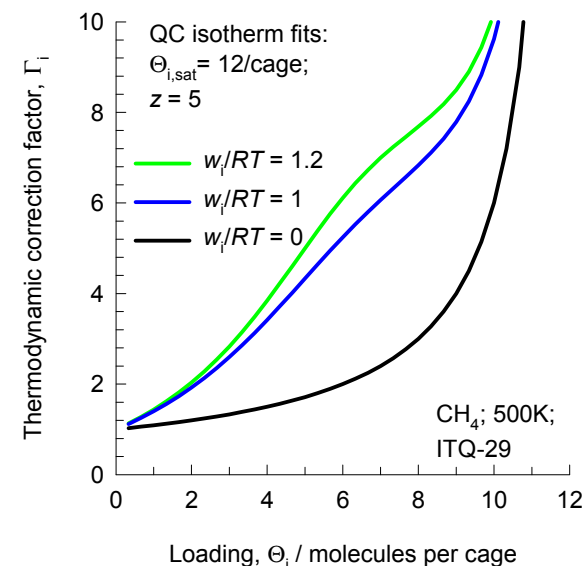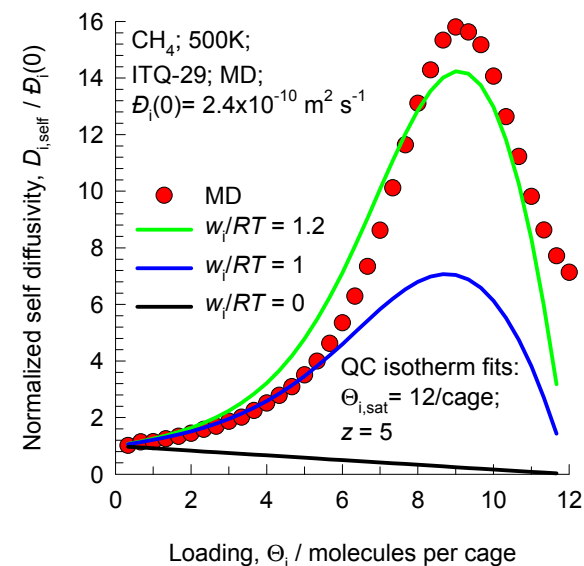

The model used to describe the concentration dependence of  $\bar{D}_i$  is described in detail in Krishna, R.; Paschek, D.; Baur, R. Modelling the occupancy dependence of diffusivities in zeolites, Microporous Mesoporous Mater. 2004, 76, 233-246.

# ITQ-29, diffusivity of CH<sub>4</sub>

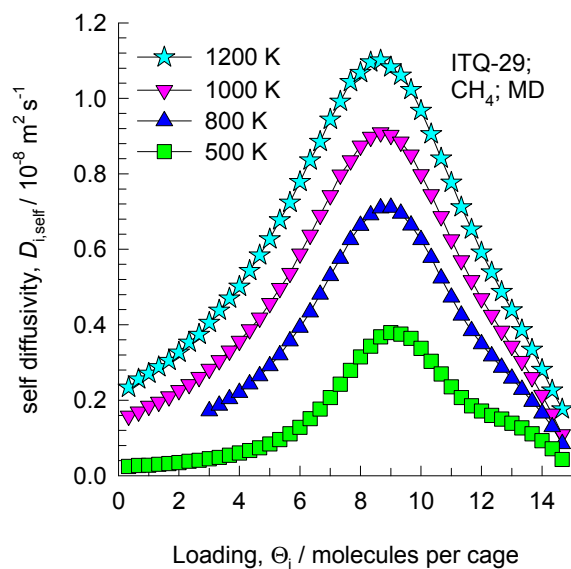

These data are for rigid frameworks

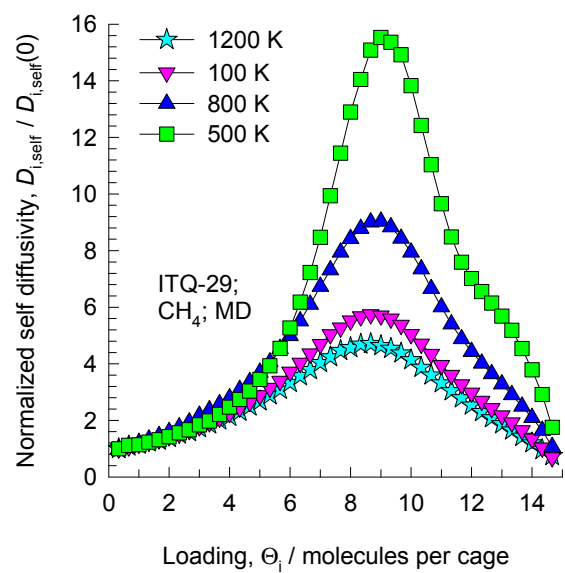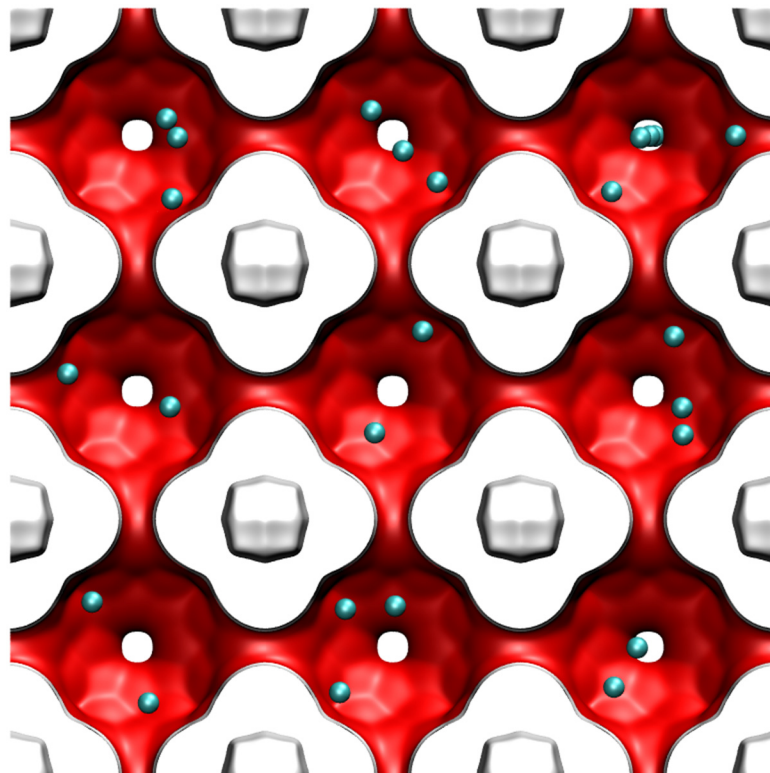

# LTA-Si landscapes

This is a *hypothetical* structure constructed from dealuminized LTA-5A structure

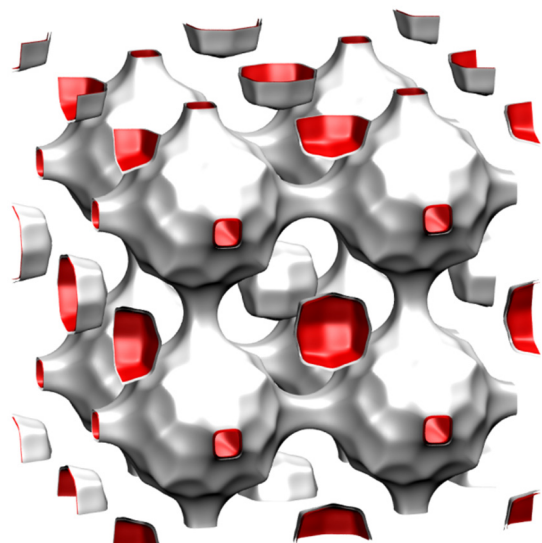

There are 8 cages per unit cell.  
The volume of one LTA cage is 743 Å<sup>3</sup>, intermediate in size between a single cage of ZIF-8 (1168 Å<sup>3</sup>) and of DDR (278 Å<sup>3</sup>).

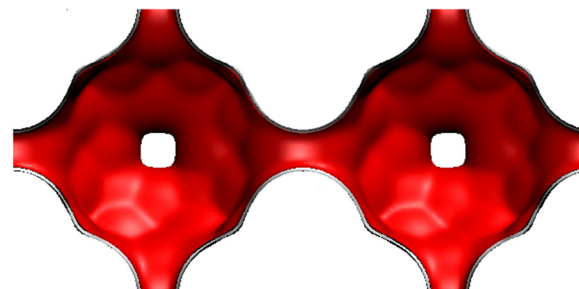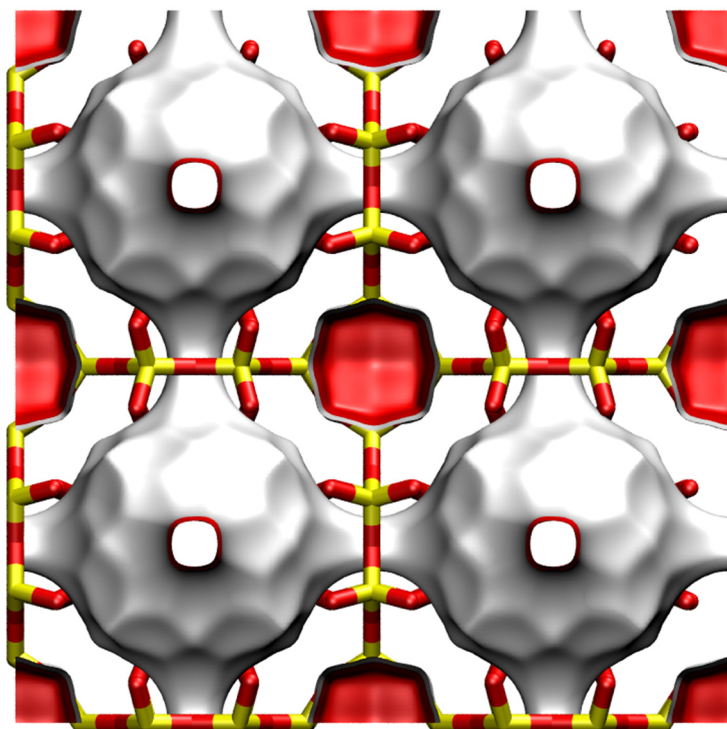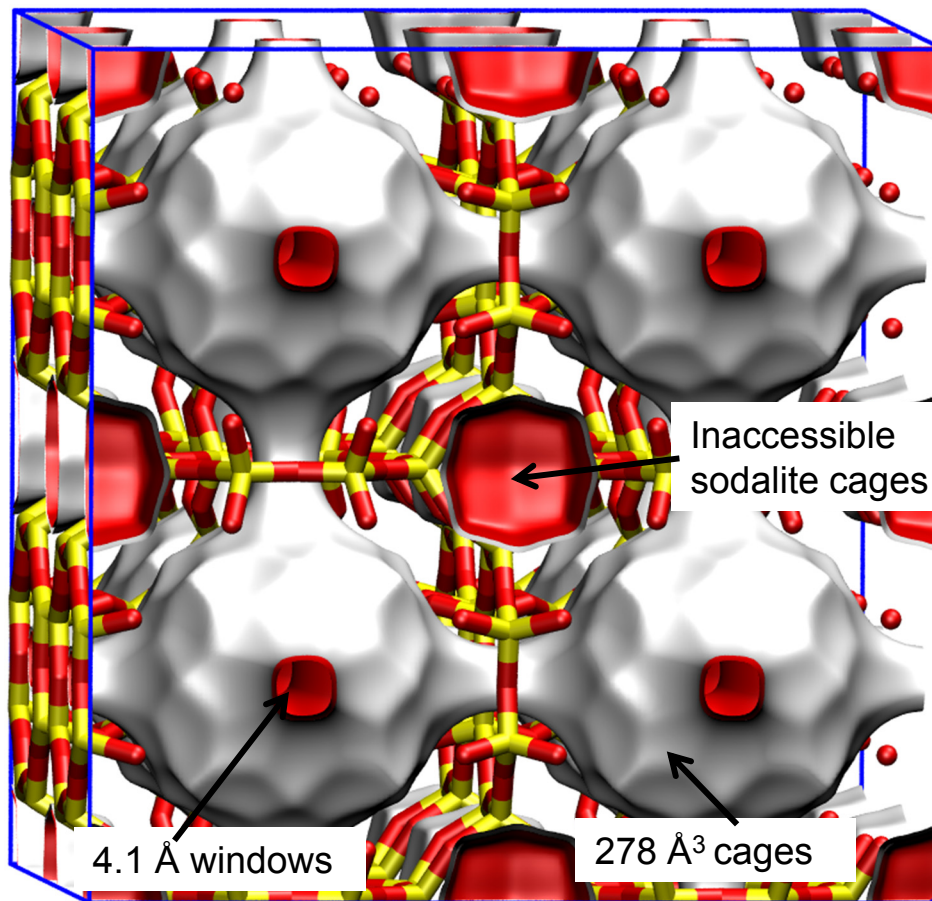

# LTA-Si window and pore dimensions

8-ring  
window  
of LTA

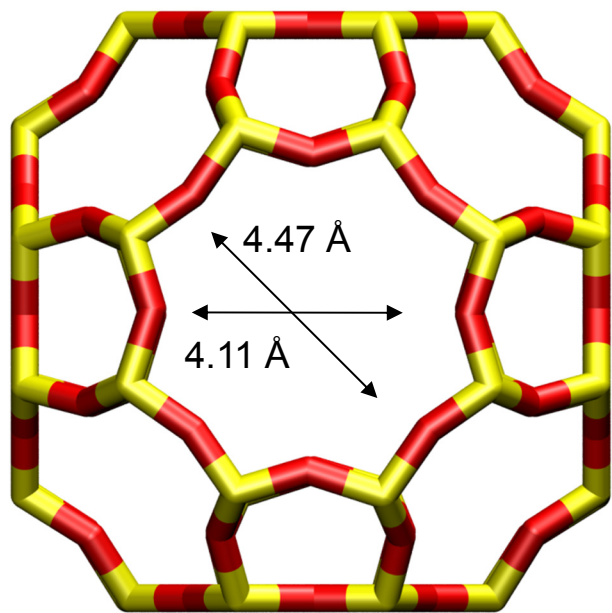

The window dimension calculated using the van der Waals diameter of framework atoms = 2.7 Å is indicated above by the arrows.

This plot of surface area versus pore dimension is determined using a combination of the DeLaunay triangulation method for pore dimension determination, and the procedure of Dürren for determination of the surface area.

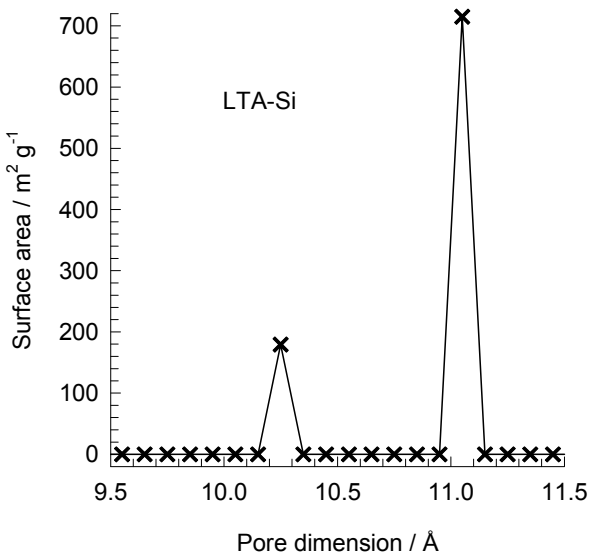

|                                                            | LTA-Si   |
|------------------------------------------------------------|----------|
| <i>a</i> /Å                                                | 24.61    |
| <i>b</i> /Å                                                | 24.61    |
| <i>c</i> /Å                                                | 24.61    |
| Cell volume / Å³                                           | 14905.1  |
| conversion factor for [molec/uc] to [mol per kg Framework] | 0.0867   |
| conversion factor for [molec/uc] to [kmol/m³]              | 0.2794   |
| $\rho$ [kg/m3]                                             | 1285.248 |
| MW unit cell [g/mol(framework)]                            | 11536.28 |
| $\phi$ , fractional pore volume                            | 0.399    |
| open space / Å³/uc                                         | 5944.4   |
| Pore volume / cm³/g                                        | 0.310    |
| Surface area /m²/g                                         | 896.0    |
| DeLaunay diameter /Å                                       | 4.10     |

# LTA-Si CBMC simulations of isotherms, and isosteric heats of adsorption

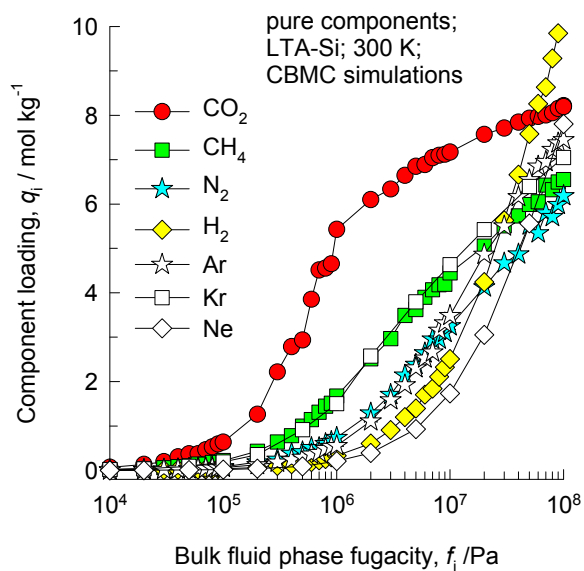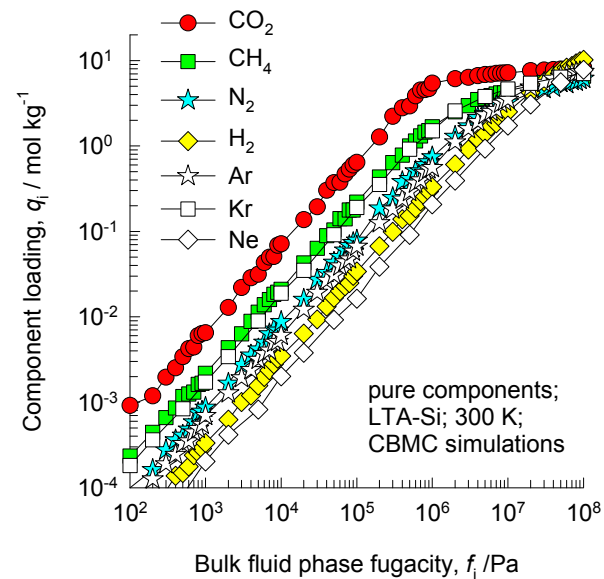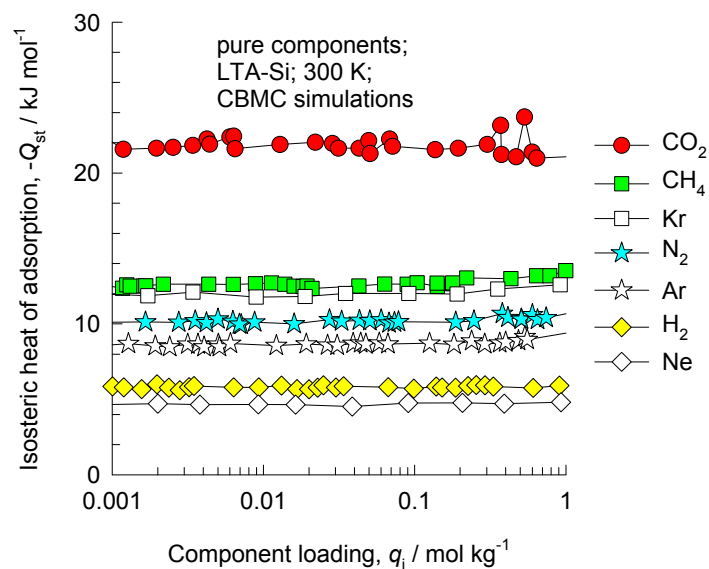

# LTA-Si Modeling the loading dependence of CH<sub>4</sub> diffusivity

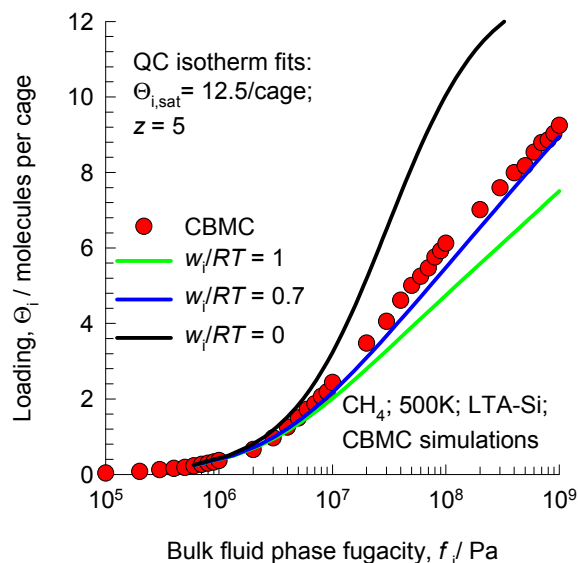

Quasi - Chemical isotherm

$$b_i f_i = \frac{\theta_i}{(1 - \theta_i)} \left( \frac{2(1 - \theta_i)}{\zeta_i + 1 - 2\theta_i} \right)^z$$

$$\theta_i = c_i / c_{i,sat} = q_i / q_{i,sat} = \Theta_i / \Theta_{i,sat}$$

$$\zeta_i = \sqrt{1 - 4\theta_i(1 - \theta_i)(1 - \exp(-w_i/RT))}$$

$$\Gamma_i = \frac{1}{(1 - \theta_i)} \left( 1 + \frac{z(1 - \zeta_i)}{2\zeta_i} \right)$$

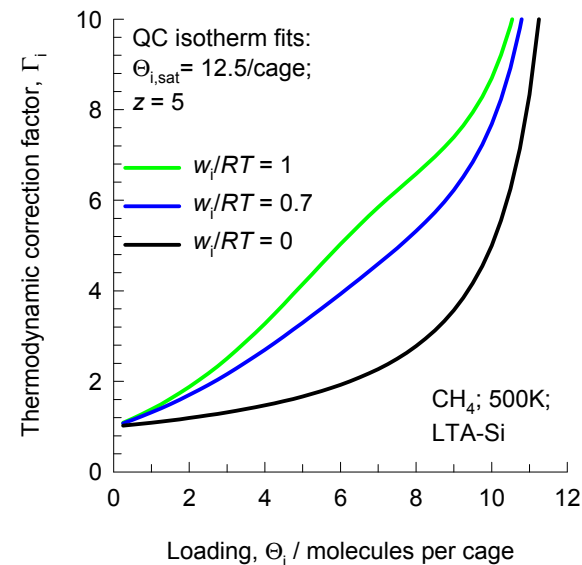

Krishna, Paschek and Baur (2004) model

$$D_i = D_i(0) \left( \frac{1 + \zeta_i}{2(1 - \theta_i)} \right)^{-z} \left( 1 + \frac{(\zeta_i - 1 + 2\theta_i) \exp(w_i/RT)}{2(1 - \theta_i)} \right)^{z-1}$$

$$\zeta_i = \sqrt{1 - 4\theta_i(1 - \theta_i)(1 - \exp(-w_i/RT))}$$

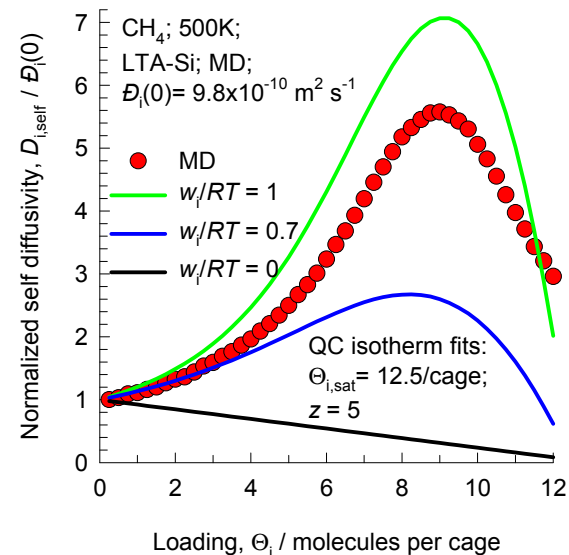

The model used to describe the concentration dependence of  $\bar{D}_i$  is described in detail in Krishna, R.; Paschek, D.; Baur, R. Modelling the occupancy dependence of diffusivities in zeolites, Microporous Mesoporous Mater. 2004, 76, 233-246.

# LTA-Si, self-diffusivities of various guest molecules

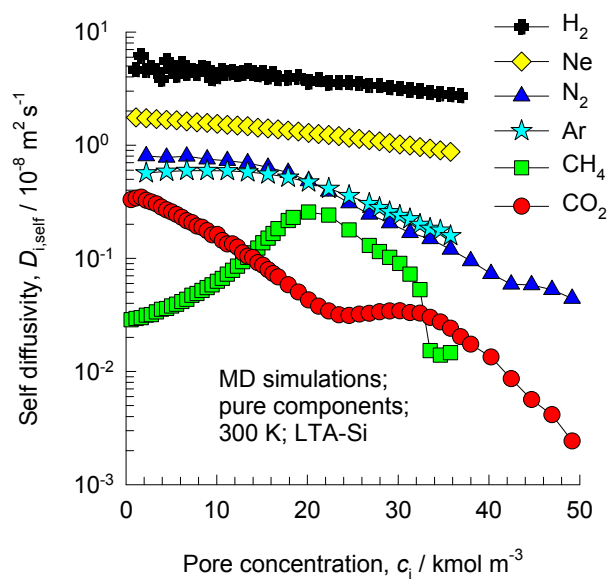

These data are for rigid frameworks

# LTA-Si, self-diffusivity of CH<sub>4</sub>

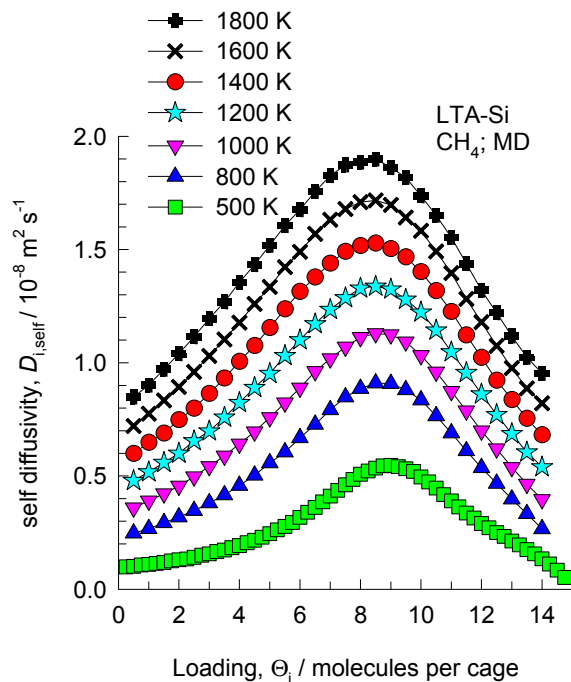

These data are for rigid frameworks

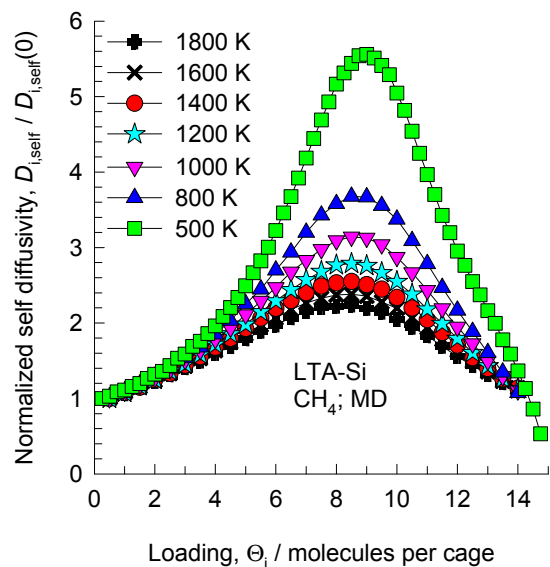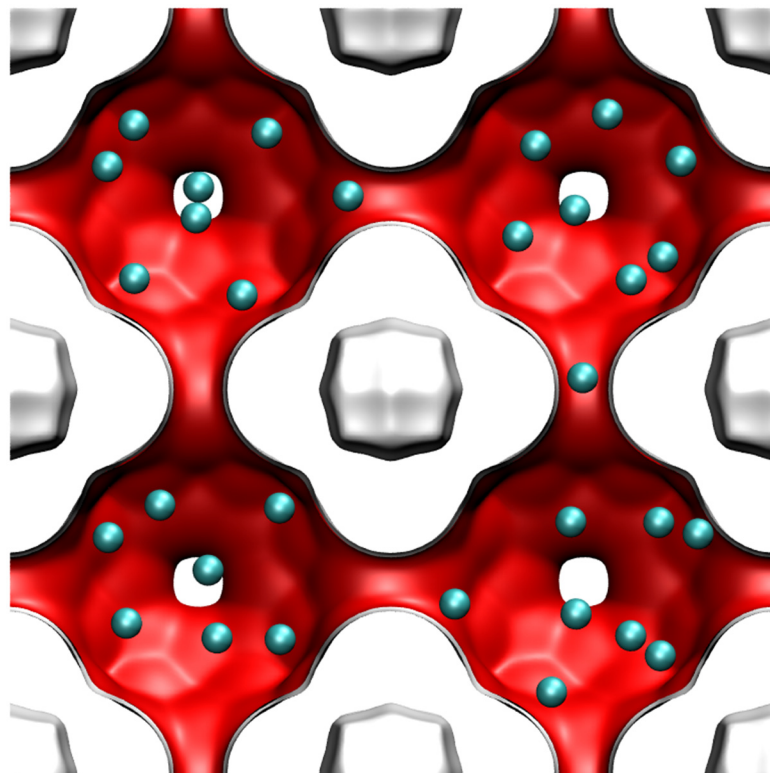

# LTA-4A

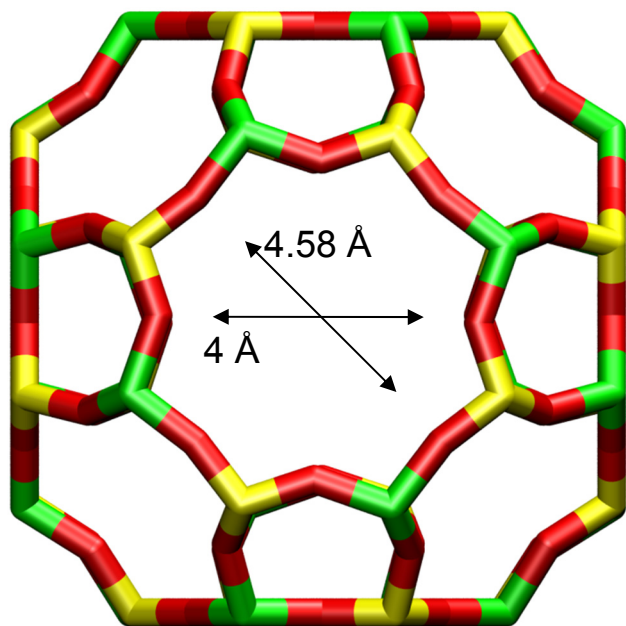

LTA-4A

The window dimension calculated using the van der Waals diameter of framework atoms = 2.7 Å is indicated above by the arrow.

Note that the Na<sup>+</sup> ions partially block the windows and therefore the diffusivities in LTA-4A are significantly lower than that for LTA Si. These cannot be determined from MD.

|                                                            | LTA-4A   |
|------------------------------------------------------------|----------|
| <i>a</i> /Å                                                | 24.555   |
| <i>b</i> /Å                                                | 24.555   |
| <i>c</i> /Å                                                | 24.555   |
| Cell volume / Å <sup>3</sup>                               | 14805.39 |
| conversion factor for [molec/uc] to [mol per kg Framework] | 0.0733   |
| conversion factor for [molec/uc] to [kmol/m <sup>3</sup> ] | 0.2991   |
| $\rho$ [kg/m <sup>3</sup> ] (with cations)                 | 1529.55  |
| MW unit cell [g/mol(framework+cations)]                    | 13637.27 |
| $\phi$ , fractional pore volume                            | 0.375    |
| open space / Å <sup>3</sup> /uc                            | 5552.0   |
| Pore volume / cm <sup>3</sup> /g                           | 0.245    |
| Surface area /m <sup>2</sup> /g                            |          |
| DeLaunay diameter /Å                                       | 4.00     |

# LTA-4A

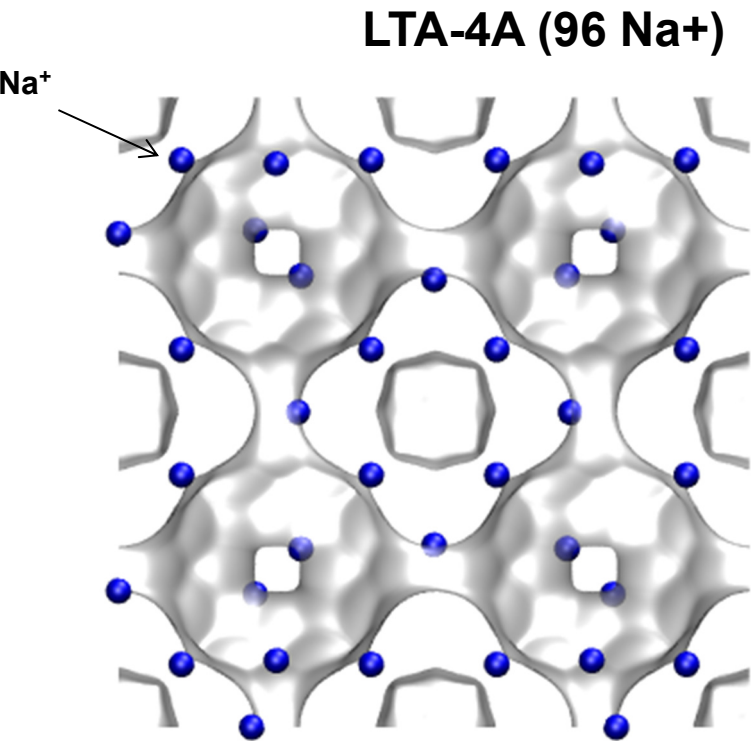

# LTA-4A: Transient uptake of C<sub>2</sub>H<sub>6</sub>

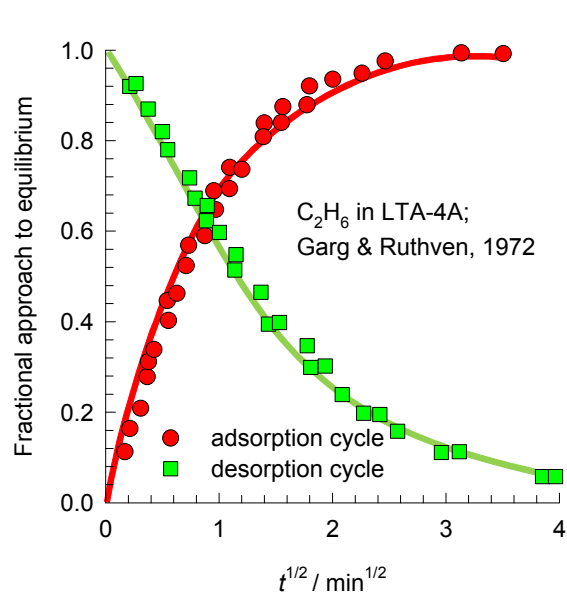

The data are re-plotted using the information contained in  
Garg, D. R.; Ruthven, D. M. Effect of the concentration dependence of diffusivity on zeolitic sorption curves, Chem. Eng. Sci. 1972, 27, 417-423. .

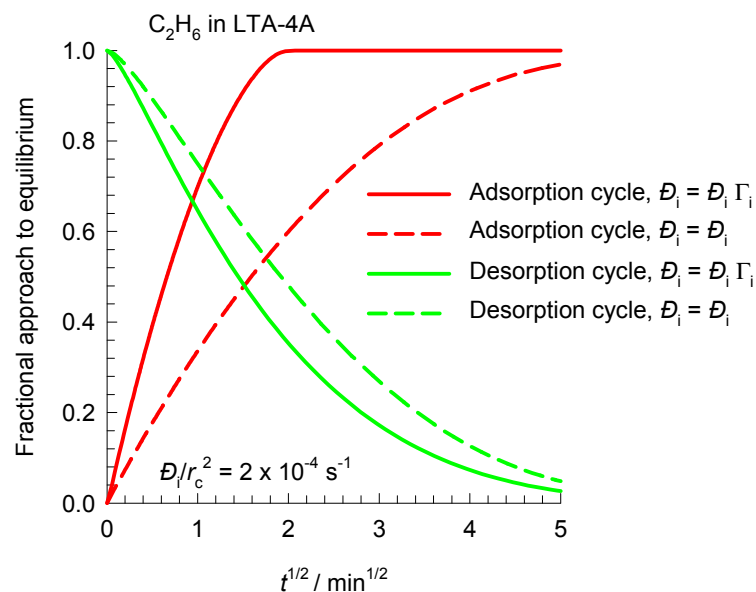

The continuous solid lines are simulations including the thermodynamic correction factor,  $\Gamma_i$ . These simulations capture the asymmetry in the adsorption and desorption cycles.

The dashed lines are simulations in which  $\Gamma_i = 1$ . These simulations anticipate that the adsorption and desorption cycles are symmetric.

The simulations assume a constant, loading independent M-S diffusivity,  $\mathcal{D}_i$ . We take  $\mathcal{D}_i/r_c^2 = 0.0002 \text{ s}^{-1}$  where  $r_c$  is the crystal radius.

# LTA-4A: Transient uptake of N<sub>2</sub> and CH<sub>4</sub>

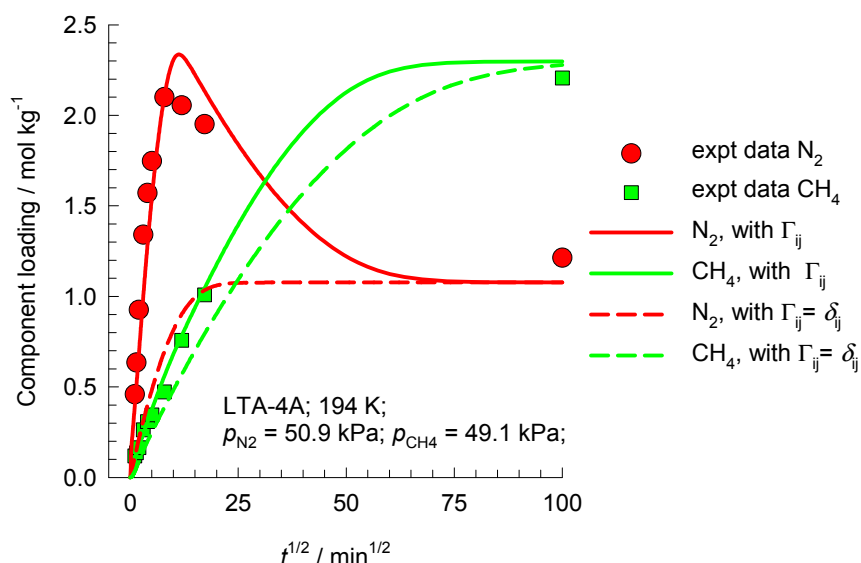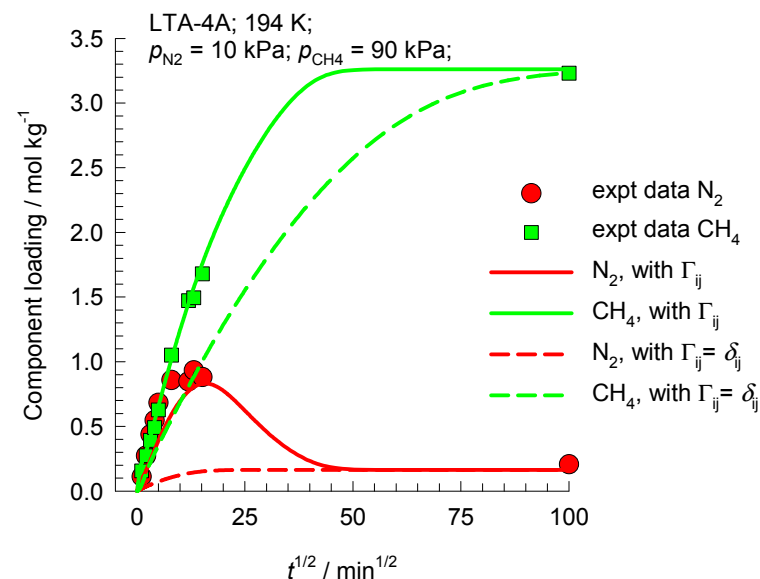

The experimental data are re-plotted using the information contained in Habgood, H. W. The kinetics of molecular sieve action. Sorption of nitrogen-methane mixtures by Linde molecular sieve 4A, Canad. J. Chem. 1958, 36, 1384-1397.

In these simulations, both the M-S diffusivities are assumed to be independent of loading. The overshoot in N<sub>2</sub> is not, therefore, a result of the loading dependence of its M-S diffusivity.

The overshoot in the N<sub>2</sub> uptake is a direct consequence of thermodynamic coupling caused by the off-diagonal elements of

$$\begin{bmatrix} \Gamma_{11} & \Gamma_{12} \\ \Gamma_{21} & \Gamma_{21} \end{bmatrix} \quad \text{where} \quad \Gamma_{ij} = \frac{q_i}{f_i} \frac{\partial f_i}{\partial q_j}$$

This has been demonstrated by Krishna, R.; Baur, R. Modelling issues in zeolite based separation processes, Sep. Purif. Technol. 2003, 33, 213-254.

If the thermodynamic coupling is ignored, i.e. we assume  $\Gamma_i = \delta_{ij}$ ; Kronecker delta  $\begin{bmatrix} \Gamma_{11} & \Gamma_{12} \\ \Gamma_{21} & \Gamma_{21} \end{bmatrix} = \begin{bmatrix} 1 & 0 \\ 0 & 1 \end{bmatrix}$

the N<sub>2</sub> overshoot disappears.

# LTA-4A: Transient uptake of CH<sub>4</sub> and C<sub>2</sub>H<sub>6</sub>

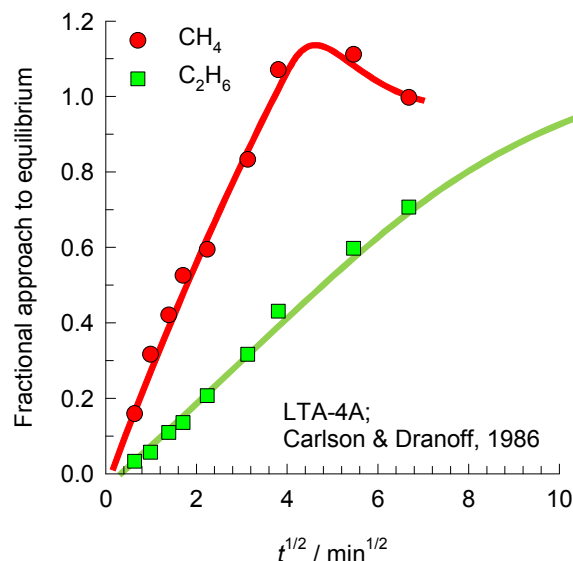

The data are re-plotted using the information contained in Carlson, N. W.; Dranoff, J. S. Competitive adsorption of methane and ethane on 4A zeolite. Fundamentals of Adsorption; Edited by A.I. Liapis, AIChE: New York, 1986.

In these simulations, both the M-S diffusivities are assumed to be independent of loading. The overshoot in CH<sub>4</sub> is not, therefore, a result of the loading dependence of its M-S diffusivity.

The overshoot in the CH<sub>4</sub> uptake is a direct consequence of thermodynamic coupling caused by the off-diagonal elements of

$$\begin{bmatrix} \Gamma_{11} & \Gamma_{12} \\ \Gamma_{21} & \Gamma_{21} \end{bmatrix} \quad \text{where} \quad \Gamma_{ij} = \frac{q_i}{f_i} \frac{\partial f_i}{\partial q_j}$$

This has been demonstrated by

Krishna, R. Diffusion of binary mixtures in microporous materials: Overshoot and roll-up phenomena, Int. Commun. Heat Mass Transf. 2000, 27, 893-902.

If the thermodynamic coupling is ignored, i.e. we assume  $\begin{bmatrix} \Gamma_{11} & \Gamma_{12} \\ \Gamma_{21} & \Gamma_{21} \end{bmatrix} = \begin{bmatrix} 1 & 0 \\ 0 & 1 \end{bmatrix}$

the CH<sub>4</sub> overshoot disappears.

# LTA-4A vs LTA-5A diffusivities of CO<sub>2</sub>

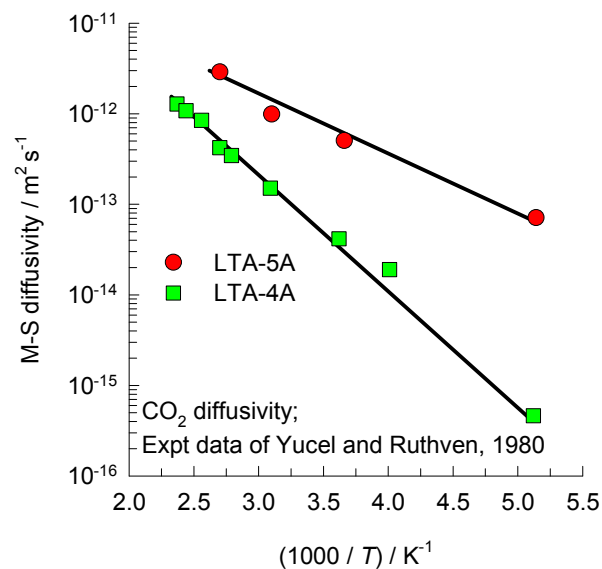

The experimental data are from

Yucel, H.; Ruthven, D.M. Diffusion of CO<sub>2</sub> in 4A and 5A zeolite crystals. Journal of Colloid and Interface Science 1980, 74, 186-195.

Note that no MD simulation results are presented for LTA-4A because the diffusivities are too low to be determined accurately.

# LTA-5A

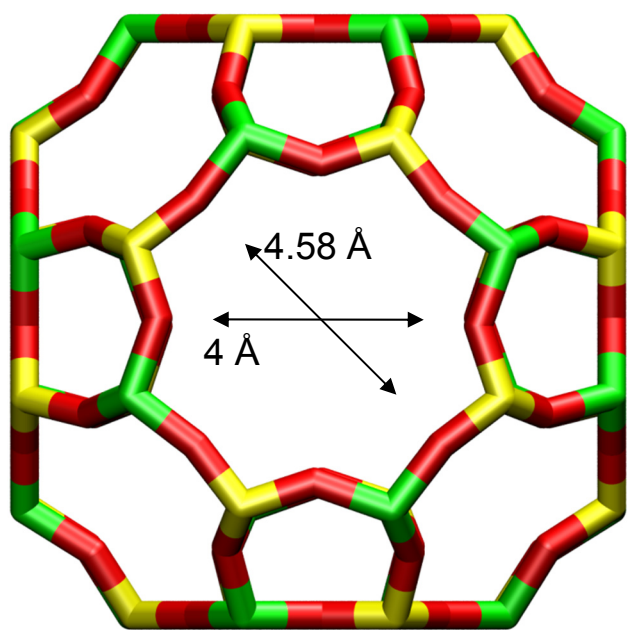

LTA-5A

The window dimension calculated using the van der Waals diameter of framework atoms = 2.7 Å is indicated above by the arrow.

|                                                            | LTA-5A   |
|------------------------------------------------------------|----------|
| <i>a</i> /Å                                                | 24.555   |
| <i>b</i> /Å                                                | 24.555   |
| <i>c</i> /Å                                                | 24.555   |
| Cell volume / Å <sup>3</sup>                               | 14805.39 |
| conversion factor for [molec/uc] to [mol per kg Framework] | 0.0744   |
| conversion factor for [molec/uc] to [kmol/m <sup>3</sup> ] | 0.2955   |
| $\rho$ [kg/m <sup>3</sup> ] (with cations)                 | 1508.376 |
| MW unit cell [g/mol(framework+cations)]                    | 13448.48 |
| $\phi$ , fractional pore volume                            | 0.380    |
| open space / Å <sup>3</sup> /uc                            | 5620.4   |
| Pore volume / cm <sup>3</sup> /g                           | 0.252    |
| Surface area /m <sup>2</sup> /g                            |          |
| DeLaunay diameter /Å                                       | 4.00     |

# LTA-5A

**LTA-5A (32 Na<sup>+</sup>, 32 Ca<sup>++</sup>)**

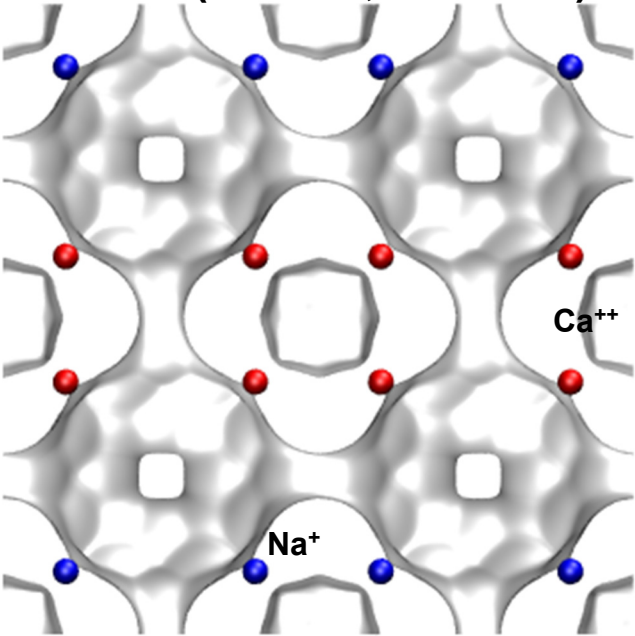

# LTA-5A Modeling the loading dependence of CH<sub>4</sub> diffusivity at 300 K

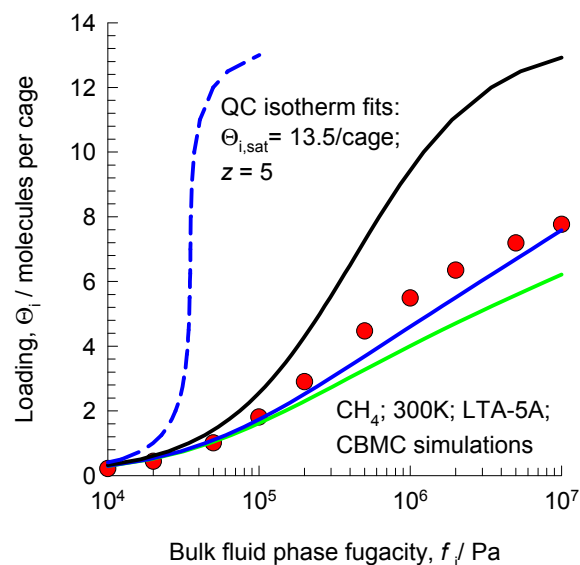

Quasi - Chemical isotherm

$$b_i f_i = \frac{\theta_i}{(1-\theta_i)} \left( \frac{2(1-\theta_i)}{\zeta_i + 1 - 2\theta_i} \right)^z$$

$$\theta_i = c_i / c_{i,sat} = q_i / q_{i,sat} = \Theta_i / \Theta_{i,sat}$$

$$\zeta_i = \sqrt{1 - 4\theta_i(1-\theta_i)(1 - \exp(-w_i/RT))}$$

$$\Gamma_i = \frac{1}{(1-\theta_i)} \left( 1 + \frac{z}{2} \frac{(1-\zeta_i)}{\zeta_i} \right)$$

Krishna, Paschek and Baur (2004) model

$$D_i = D_i(0) \left( \frac{1+\zeta_i}{2(1-\theta_i)} \right)^{-z} \left( 1 + \frac{(\zeta_i - 1 + 2\theta_i)\exp(w_i/RT)}{2(1-\theta_i)} \right)^z$$

$$\zeta_i = \sqrt{1 - 4\theta_i(1-\theta_i)(1 - \exp(-w_i/RT))}$$

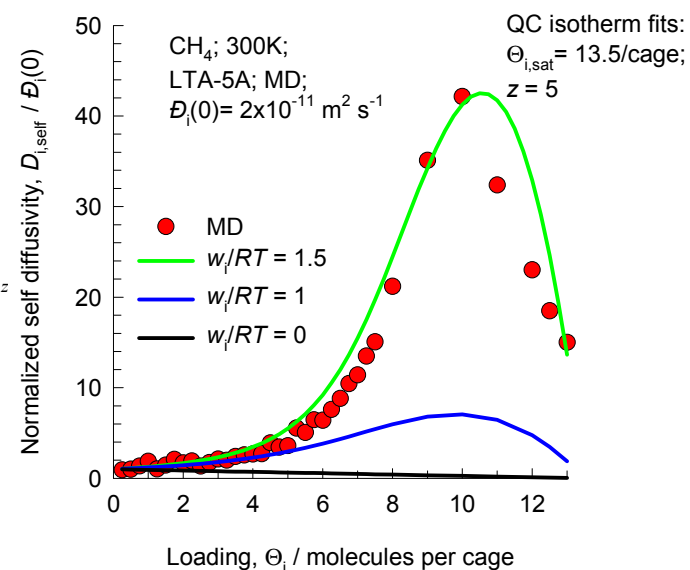

The model used to describe the concentration dependence of  $\bar{D}_i$  is described in detail in Krishna, R.; Paschek, D.; Baur, R. Modelling the occupancy dependence of diffusivities in zeolites, Microporous Mesoporous Mater. 2004, 76, 233-246.

# LTA-5A Modeling the loading dependence of CH<sub>4</sub> diffusivity at 500 K

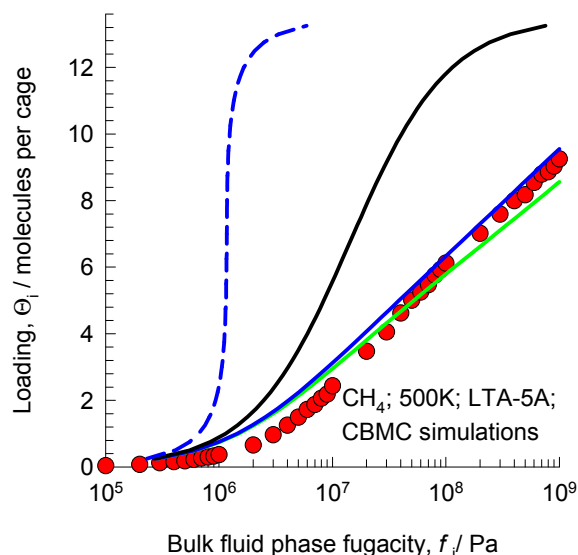

Quasi - Chemical isotherm

$$b_i f_i = \frac{\theta_i}{(1-\theta_i)} \left( \frac{2(1-\theta_i)}{\zeta_i + 1 - 2\theta_i} \right)^z$$

$$g_i = c_i / c_{i,sat} = q_i / q_{i,sat} = \Theta_i / \Theta_{i,sat}$$

$$\zeta_i = \sqrt{1 - 4\theta_i(1-\theta_i)(1 - \exp(-w_i/RT))}$$

$$\Gamma_i = \frac{1}{(1-\theta_i)} \left( 1 + \frac{z(1-\zeta_i)}{2\zeta_i} \right)$$

Krishna, Paschek and Baur (2004) model

$$D_i = D_i(0) \left( \frac{1+\zeta_i}{2(1-\theta_i)} \right)^{-z} \left( 1 + \frac{(\zeta_i - 1 + 2\theta_i)\exp(w_i/RT)}{2(1-\theta_i)} \right)^{z-1}$$

$$\zeta_i = \sqrt{1 - 4\theta_i(1-\theta_i)(1 - \exp(-w_i/RT))}$$

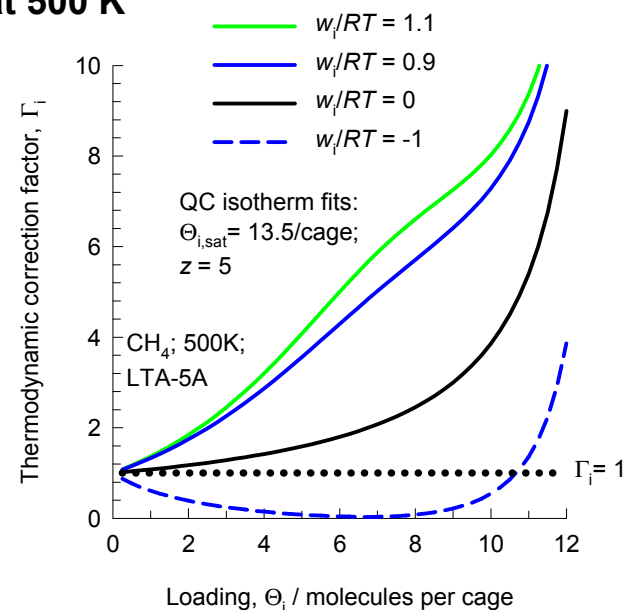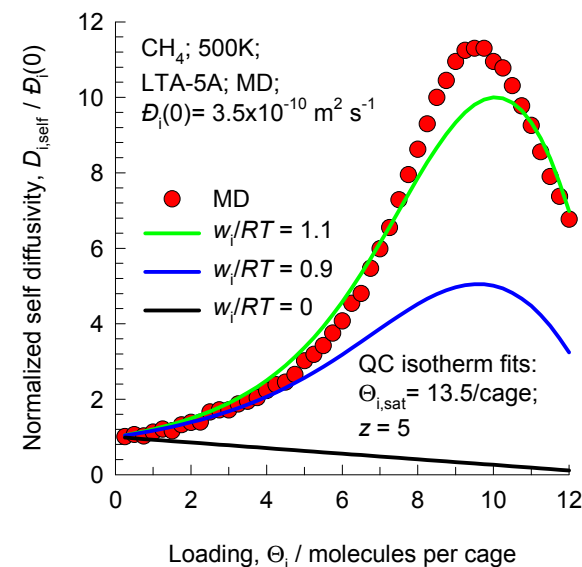

The model used to describe the concentration dependence of  $D_i$  is described in detail in Krishna, R.; Paschek, D.; Baur, R. Modelling the occupancy dependence of diffusivities in zeolites, Microporous Mesoporous Mater. 2004, 76, 233-246.

# LTA-5A, diffusivity of CH<sub>4</sub>

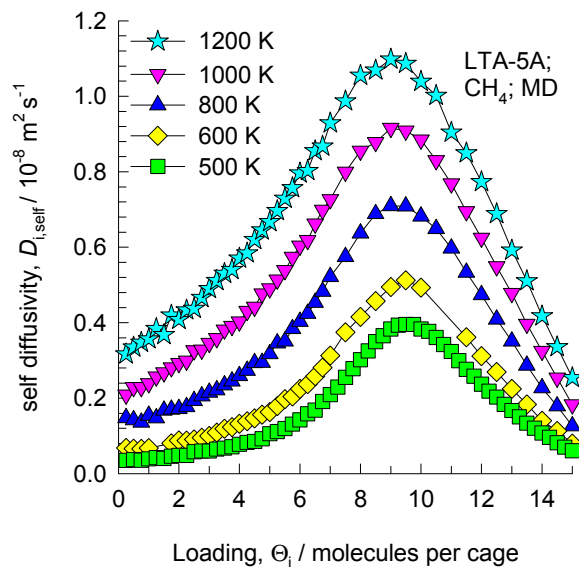

These data are for rigid frameworks

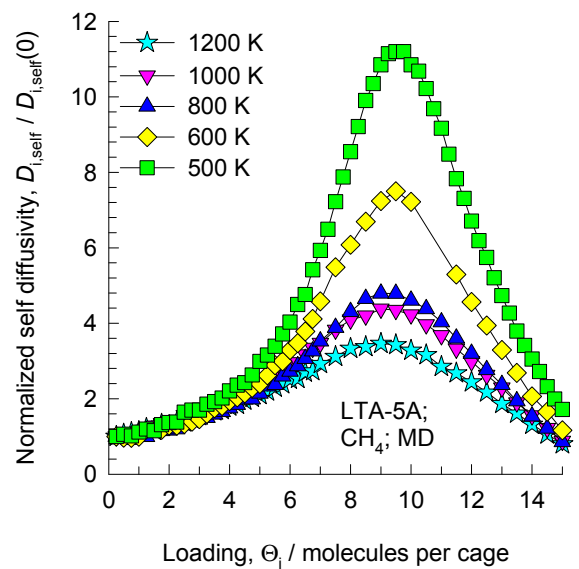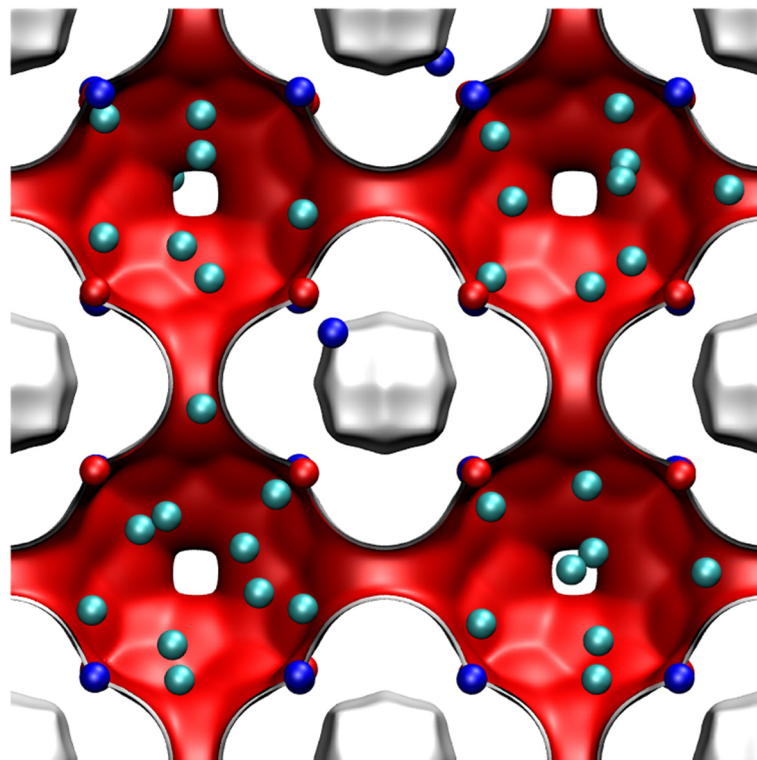

# LTA-5A Modeling the MR experiments of Caro

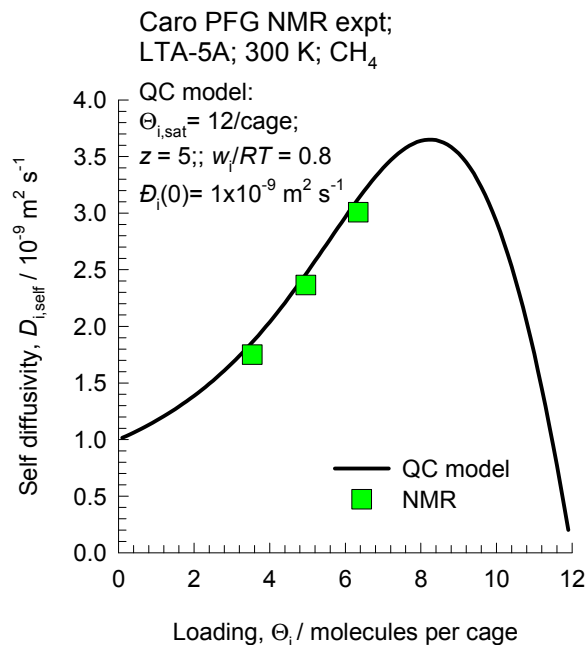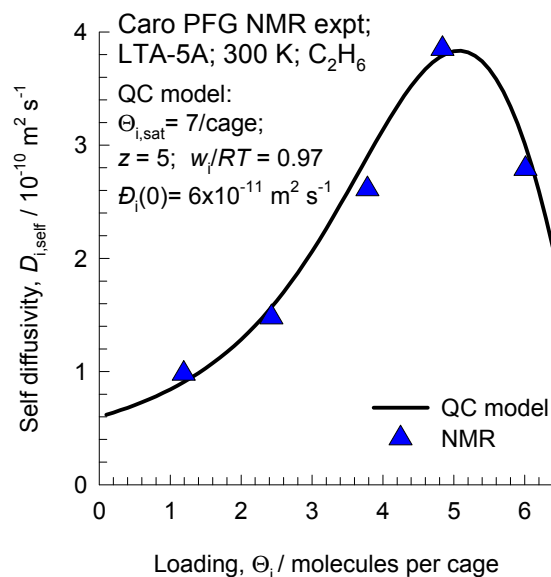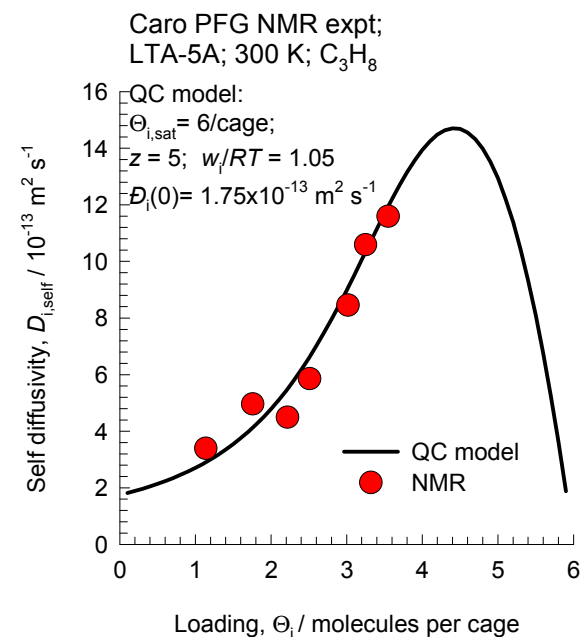

The experimental data are from

Caro, J.; Bülow, M.; Schirmer, W.; Kärger, J.; Heink, W.; Pfeifer, H. Microdynamics of methane, ethane and propane in ZSM-5 type zeolites. Journal of the Chemical Society, Faraday Transactions 1985, 81, 2541-2550.

# SOD-Si pore landscape

The ZIF-8 structure is analogous to that of SOD.

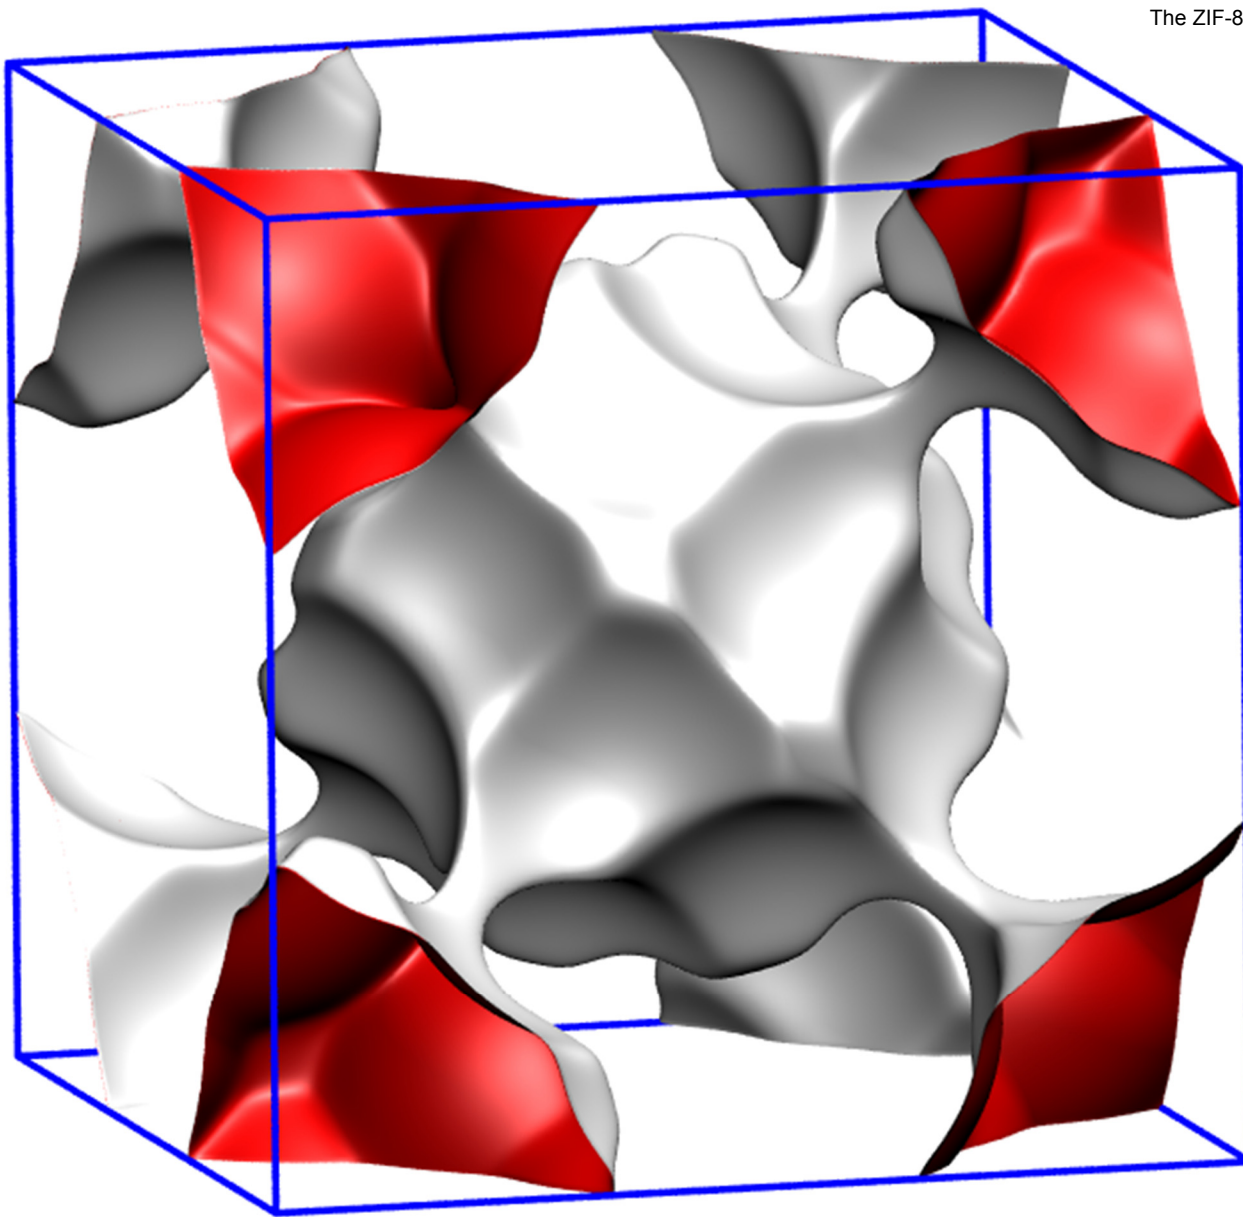

There are 2 cages per unit cell.  
The volume of one SOD cage is  $84.8 \text{ \AA}^3$ , significantly smaller than that of ZIF-8 ( $1168 \text{ \AA}^3$ ), its structural analog.

Structural information from: C. Baerlocher, L.B. McCusker, Database of Zeolite Structures, International Zeolite Association, <http://www.iza-structure.org/databases/>

# SOD-Si dimensions

|                                                            | SOD-Si   |
|------------------------------------------------------------|----------|
| $a / \text{\AA}$                                           | 8.89     |
| $b / \text{\AA}$                                           | 8.89     |
| $c / \text{\AA}$                                           | 8.89     |
| Cell volume / $\text{\AA}^3$                               | 702.5954 |
| conversion factor for [molec/uc] to [mol per kg Framework] | 1.3869   |
| conversion factor for [molec/uc] to [kmol/m <sup>3</sup> ] | 9.7908   |
| $\rho$ [kg/m <sup>3</sup> ]                                | 1704.106 |
| MW unit cell [g/mol(framework)]                            | 721.0176 |
| $\phi$ , fractional pore volume                            | 0.241    |
| open space / $\text{\AA}^3/\text{uc}$                      | 169.6    |
| Pore volume / cm <sup>3</sup> /g                           | 0.142    |
| Surface area /m <sup>2</sup> /g                            |          |
| DeLaunay diameter / $\text{\AA}$                           | 2.47     |

# TSC landscape

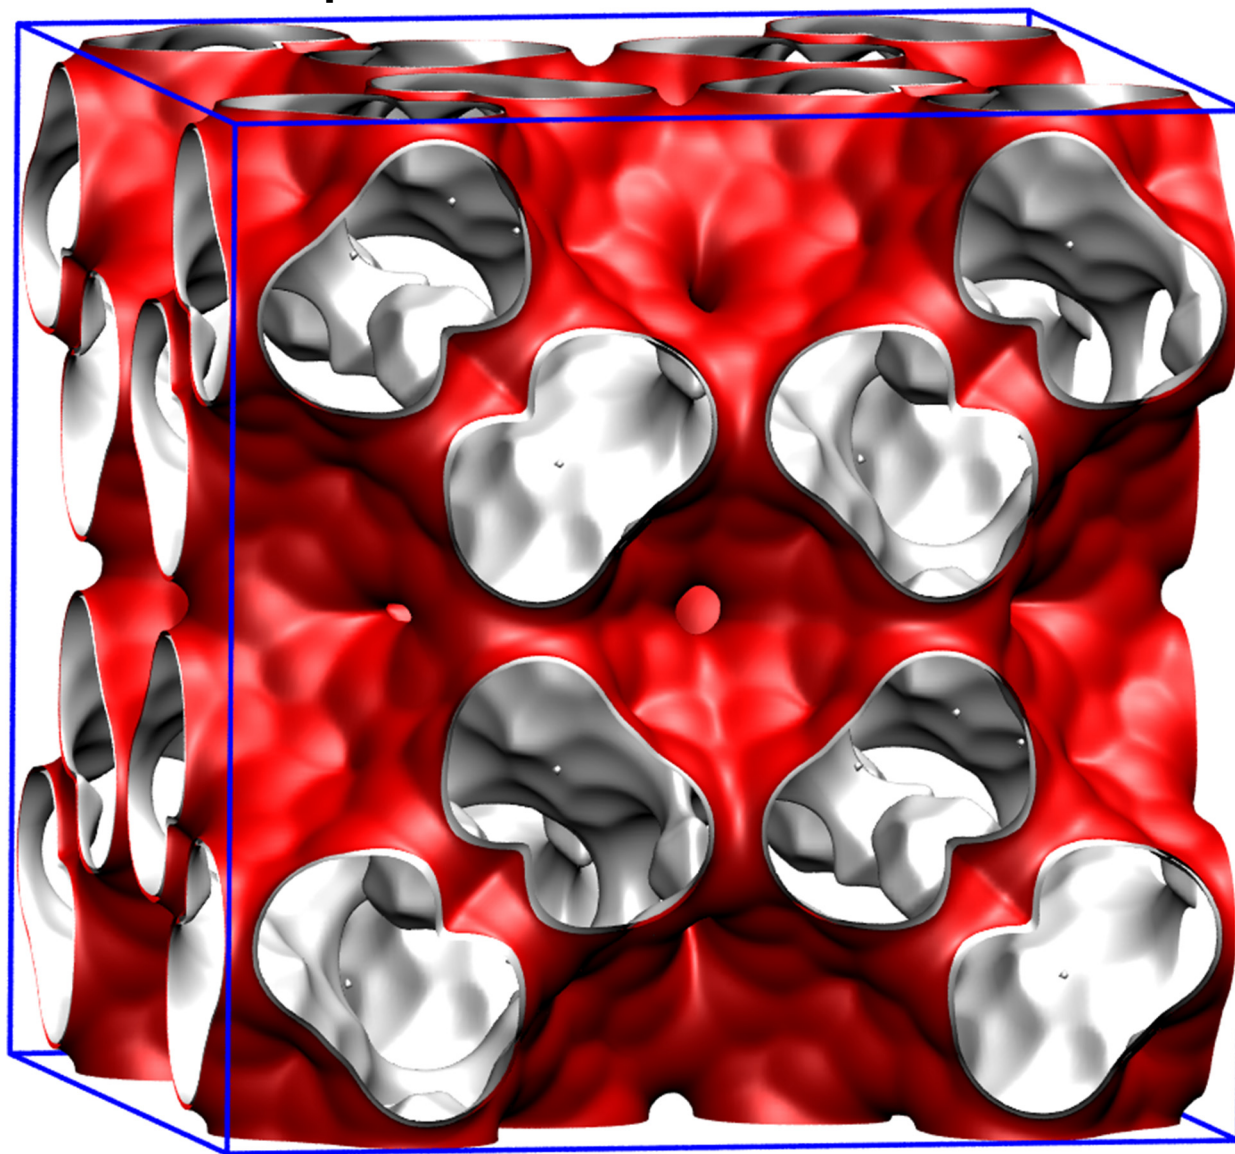

**Unit cell  
of TSC**

Structural information from: C. Baerlocher, L.B. McCusker, Database of Zeolite Structures, International Zeolite Association,  
<http://www.iza-structure.org/databases/>

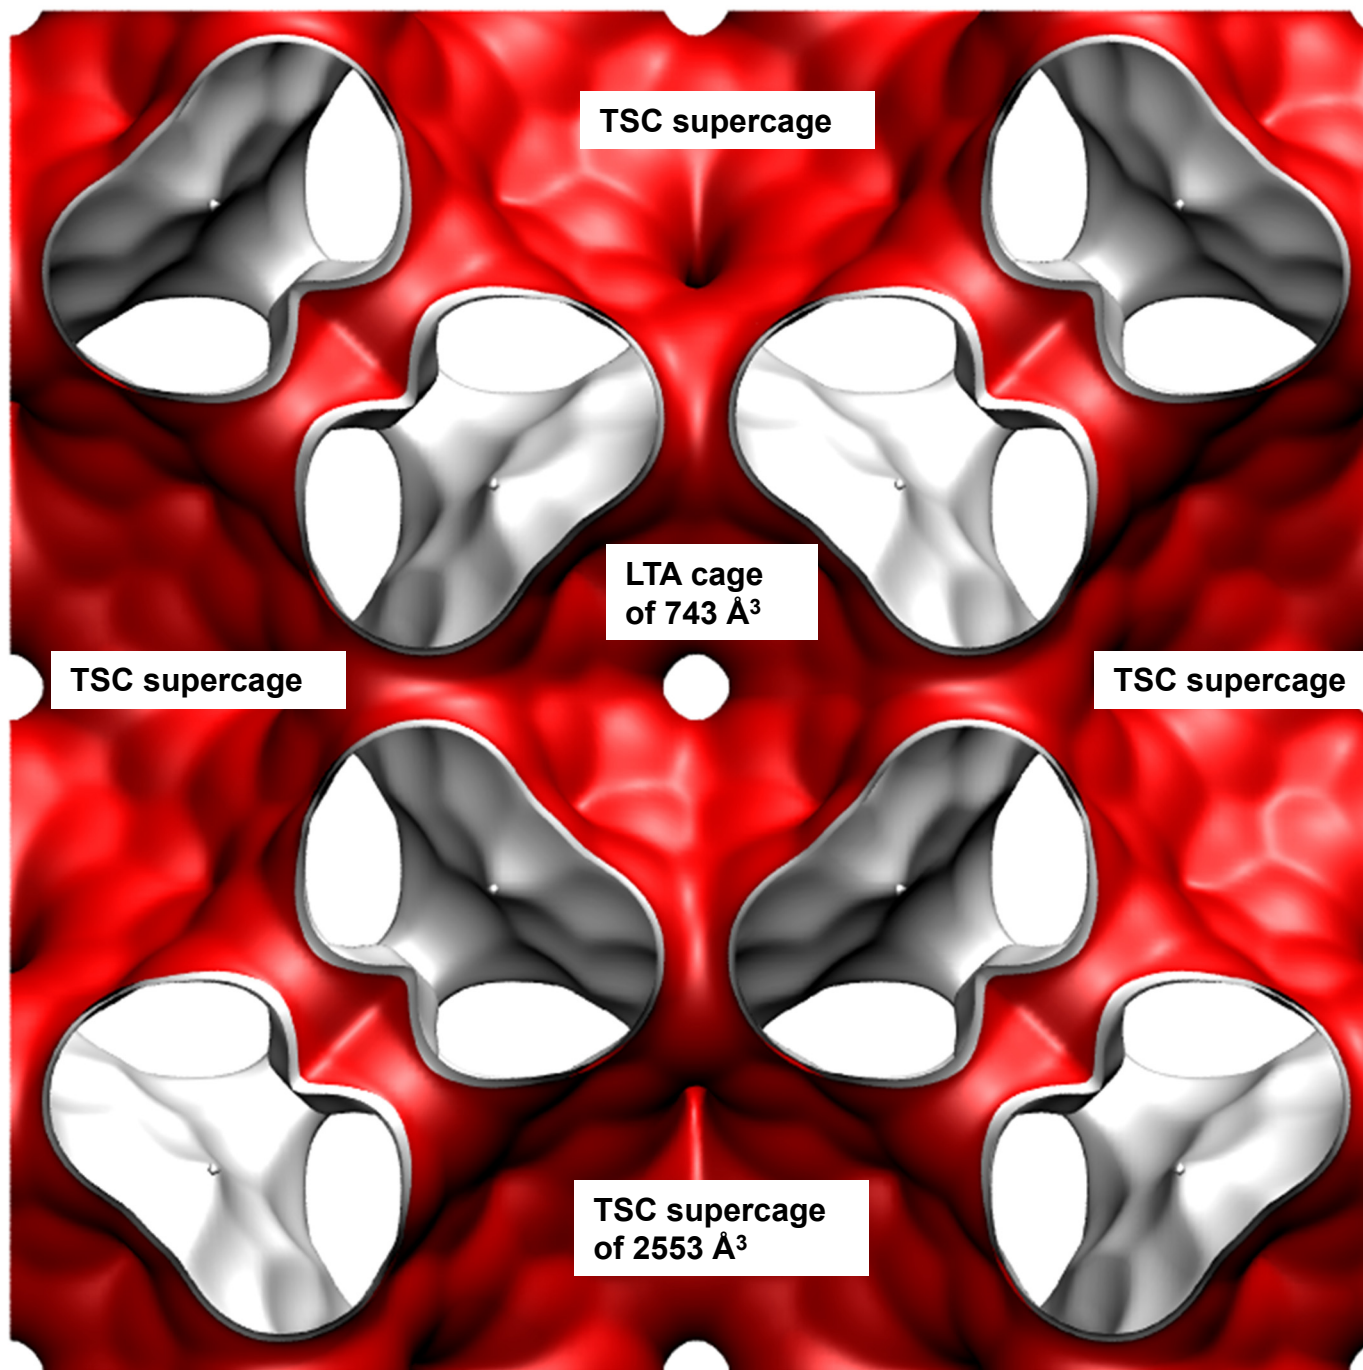

8-ring windows of two sizes:  
4.2x4.2 Å along [100]  
3.1x5.6 Å along [110]

**Front  
plane of  
unit cell  
of TSC**

# TSC window and pore dimensions

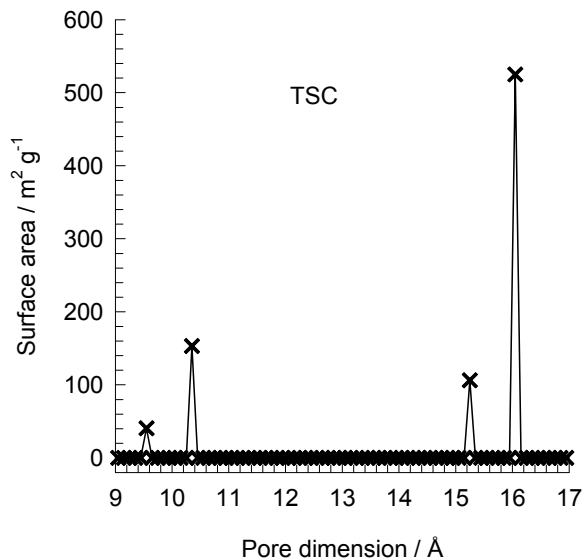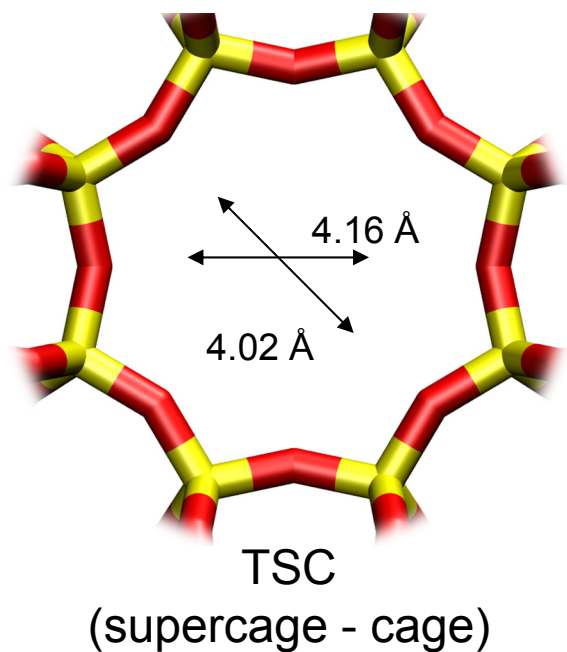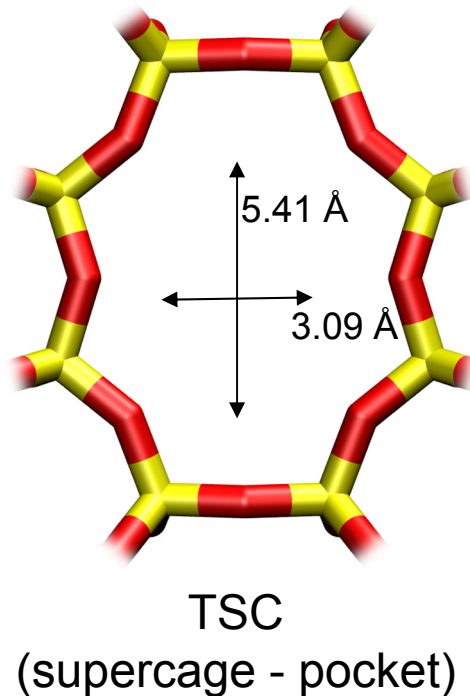

|                                                               | TSC      |
|---------------------------------------------------------------|----------|
| <i>a</i> / Å                                                  | 30.742   |
| <i>b</i> / Å                                                  | 30.742   |
| <i>c</i> / Å                                                  | 30.742   |
| Cell volume / Å <sup>3</sup>                                  | 29053.36 |
| conversion factor for [molec/uc]<br>to [mol per kg Framework] | 0.0433   |
| conversion factor for [molec/uc]<br>to [kmol/m <sup>3</sup> ] | 0.1260   |
| $\rho$ [kg/m <sup>3</sup> ]                                   | 1318.729 |
| MW unit cell [g/mol(framework)]                               | 23072.56 |
| $\phi$ , fractional pore volume                               | 0.454    |
| open space / Å <sup>3</sup> /uc                               | 13182.6  |
| Pore volume / cm <sup>3</sup> /g                              | 0.344    |
| Surface area / m <sup>2</sup> /g                              | 829.0    |
| DeLaunay diameter / Å                                         | 4.02     |

The window dimension calculated using the van der Waals diameter of framework atoms = 2.7 Å are indicated above by the arrows. It is likely that the pockets are inaccessible due to the narrow constriction of 3.092 Å. Another point to note is that the dimensions provided in the IZA website do not appear to be correct for the window on the left.

# TSC MD simulations of unary self- diffusivities

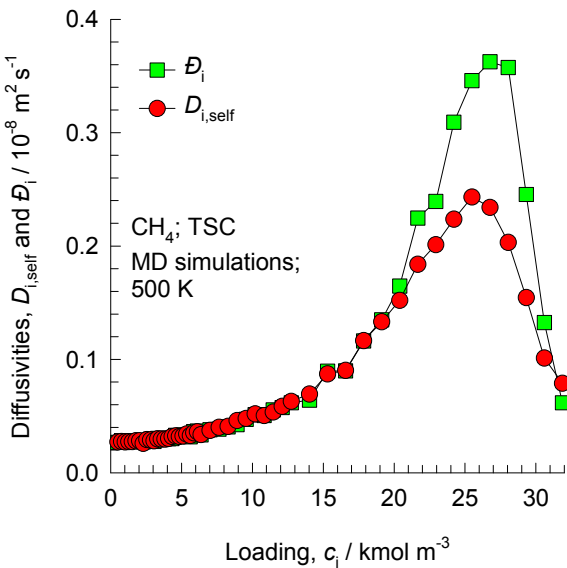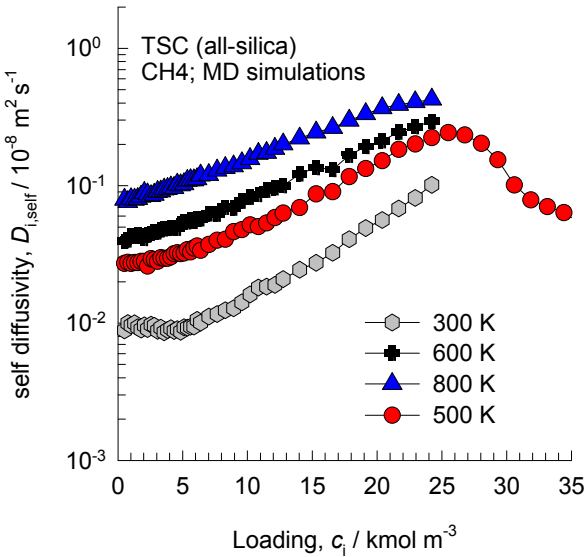

# Comparing CH<sub>4</sub> diffusivities in 8-ring zeolites

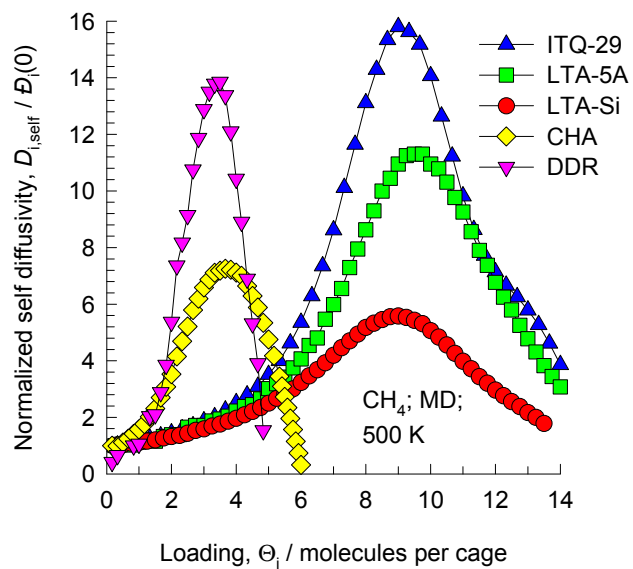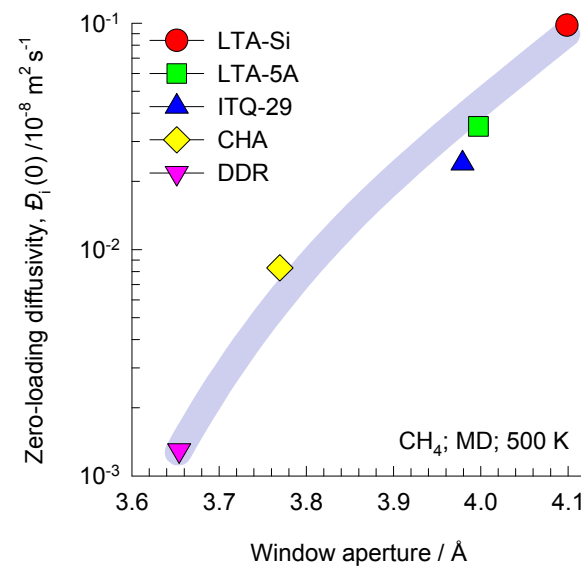

# ZIF-8 pore landscapes

The ZIF-8 =  $\text{Zn}(\text{methylimidazole})_2$  structure was taken from

R. Banerjee, A. Phan, B. Wang, C. Knobler, H. Furukawa, M. O'Keeffe, O.M. Yaghi, High-Throughput Synthesis of Zeolitic Imidazolate Frameworks and Application to  $\text{CO}_2$  Capture, *Science* 319 (2008) 939-943.

*The original structural data (cif file) contains solvent molecules; these were removed and the solvent-free structures were simulated.*

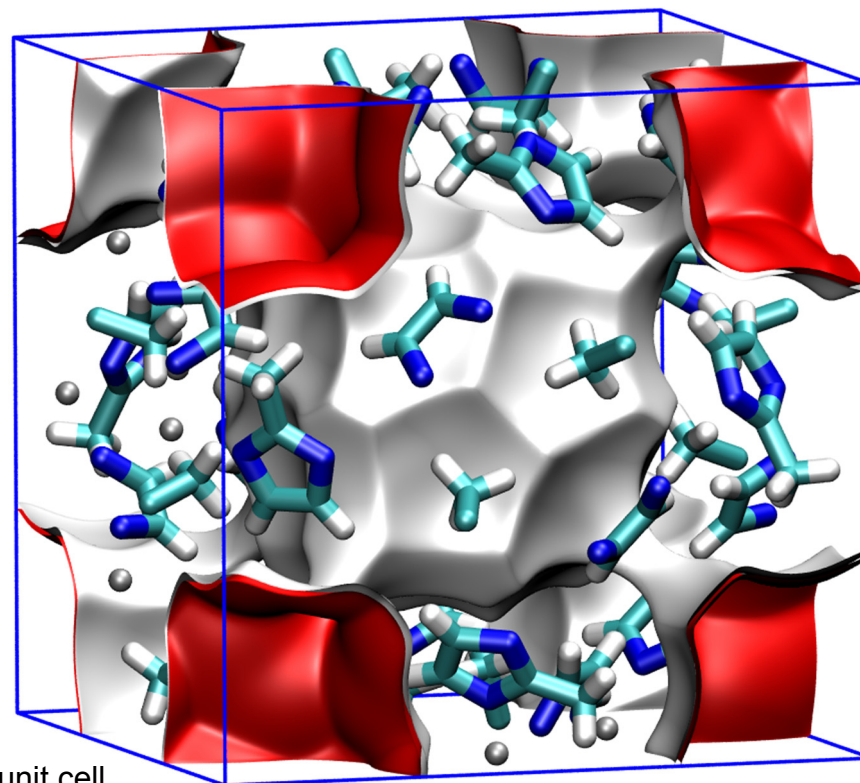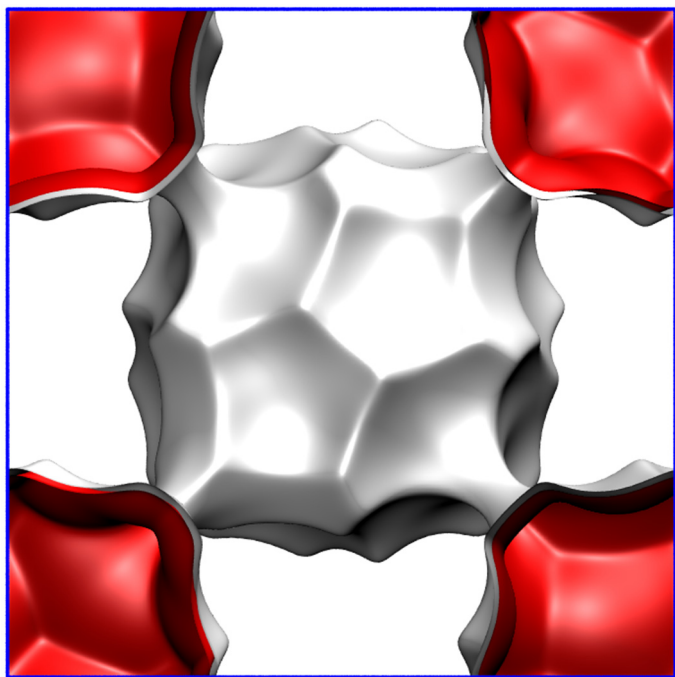

There are 2 cages per unit cell. The volume of one ZIF-8 cage is  $1168 \text{ \AA}^3$ , significantly larger than that of a single cage of DDR ( $278 \text{ \AA}^3$ ), or FAU ( $786 \text{ \AA}^3$ ).

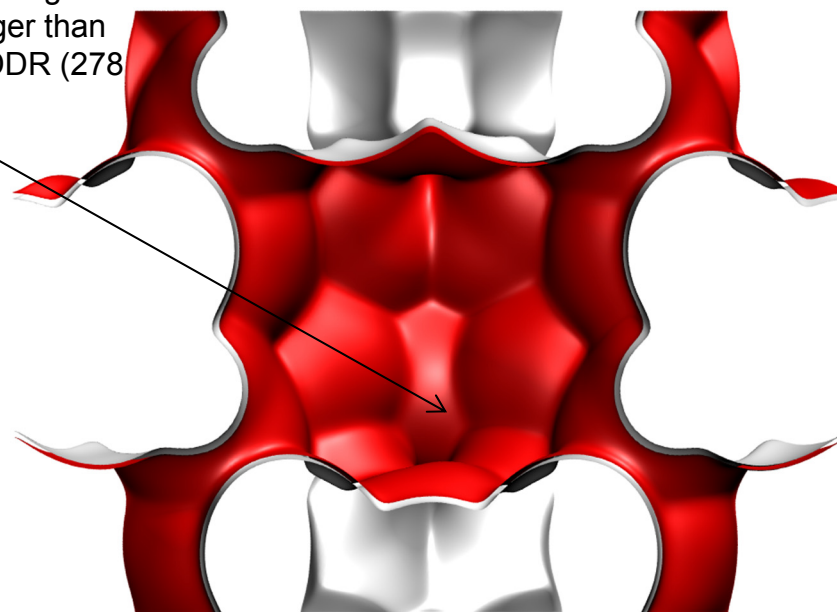

# ZIF-8 dimensions

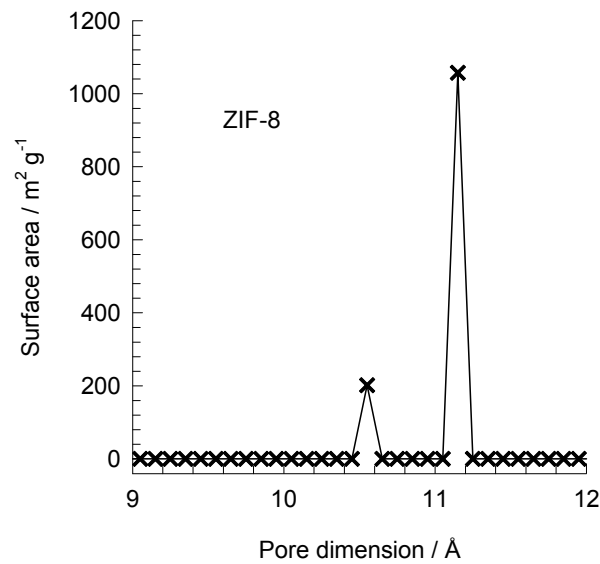

This plot of surface area versus pore dimension is determined using a combination of the DeLaunay triangulation method for pore dimension determination, and the procedure of Dürren for determination of the surface area.

|                                                            |          |
|------------------------------------------------------------|----------|
|                                                            | ZIF-8    |
| <i>a</i> /Å                                                | 16.991   |
| <i>b</i> /Å                                                | 16.991   |
| <i>c</i> /Å                                                | 16.991   |
| Cell volume / Å <sup>3</sup>                               | 4905.201 |
| conversion factor for [molec/uc] to [mol per kg Framework] | 0.3663   |
| conversion factor for [molec/uc] to [kmol/m <sup>3</sup> ] | 0.7106   |
| $\rho$ [kg/m <sup>3</sup> ]                                | 924.253  |
| MW unit cell [g/mol(framework)]                            | 2730.182 |
| $\phi$ , fractional pore volume                            | 0.476    |
| open space / Å <sup>3</sup> /uc                            | 2337.0   |
| Pore volume / cm <sup>3</sup> /g                           | 0.515    |
| Surface area /m <sup>2</sup> /g                            | 1164.7   |
| DeLaunay diameter /Å                                       | 3.26     |

# ZIF-8 methanol, ethanol, and ethane isotherms at 298 K

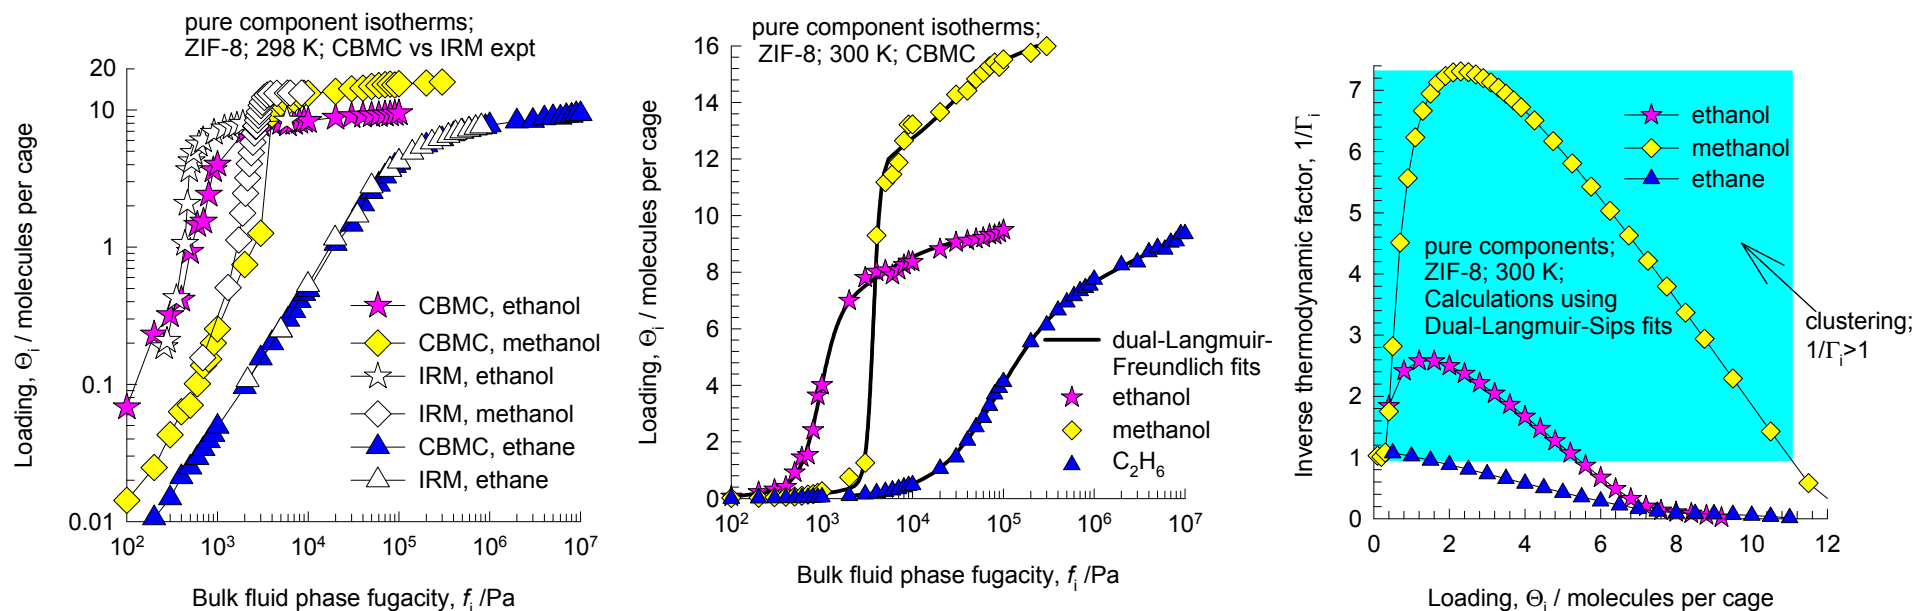

The experimental data are re-plotted using the information in:

C. Chmelik, H. Bux, J. Caro, L. Heinke, F. Hibbe, T. Titze, J. Kärger, Mass transfer in a nanoscale material enhanced by an opposing flux, Phys. Rev. Lett. 104 (2010) 085902.

The steep isotherms for methanol and ethanol are indicative of molecular clustering. This is confirmed by the inverse thermodynamic factors that significantly exceed unity for a range of molecular loadings. We should therefore expect the hierarchy of diffusivities to be “abnormal” for methanol, and ethanol.

# ZIF-8 methanol, ethanol, and ethane diffusivities at 298 K

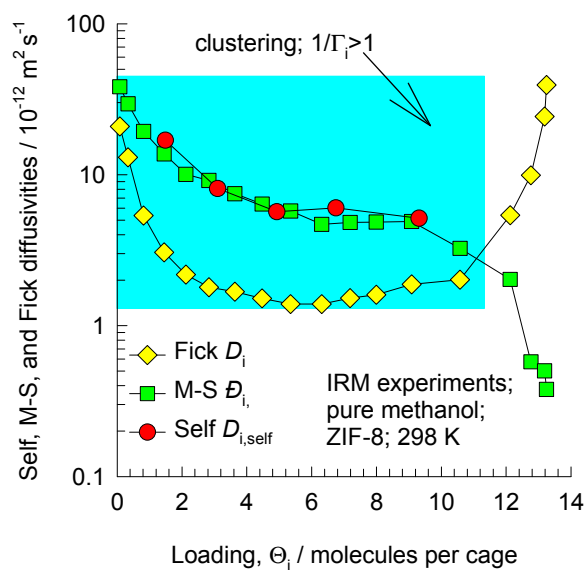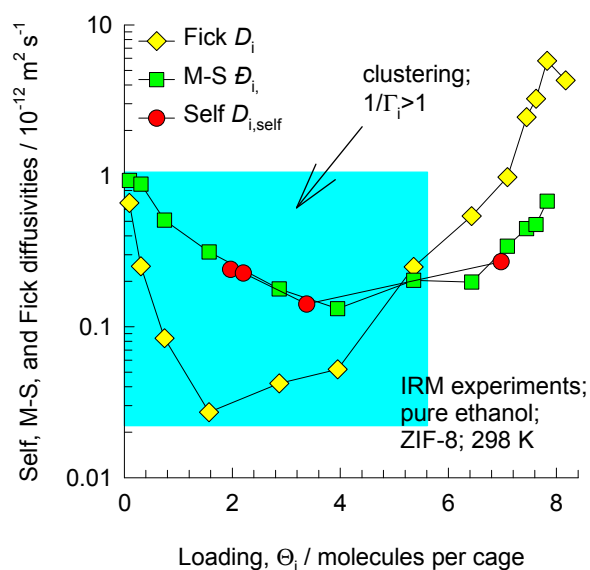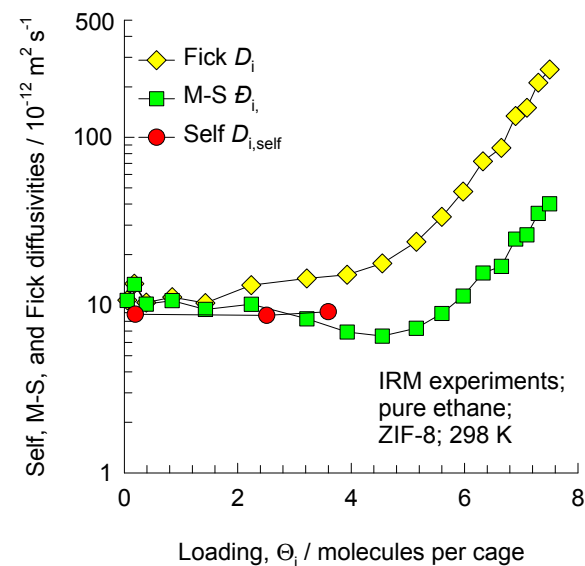

The experimental data are re-plotted using the information in:

C. Chmelik, H. Bux, J. Caro, L. Heinke, F. Hibbe, T. Titze, J. Kärger, Mass transfer in a nanoscale material enhanced by an opposing flux, Phys. Rev. Lett. 104 (2010) 085902.

The hierarchy of diffusivities is M-S = Self > Fick in regions where molecular clustering occurs.

# ZIF-8 snapshot of methanol clusters

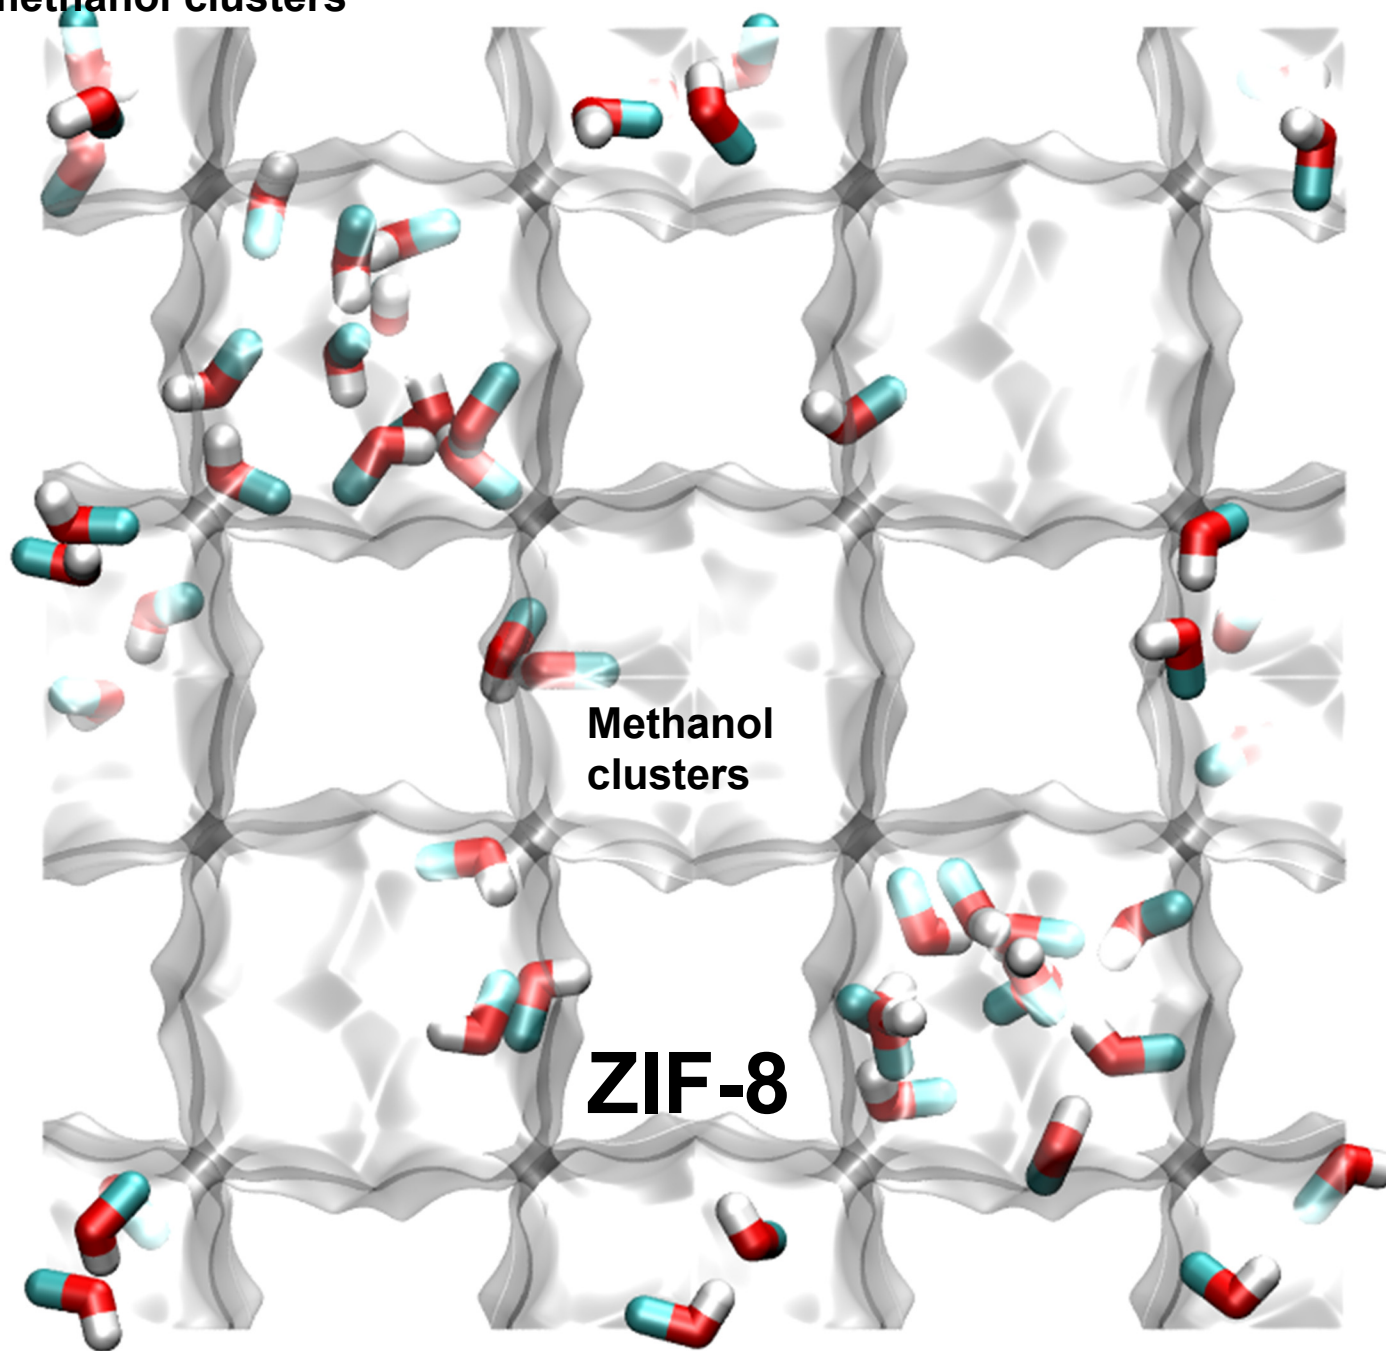

# ZIF-8 snapshot of ethanol clusters

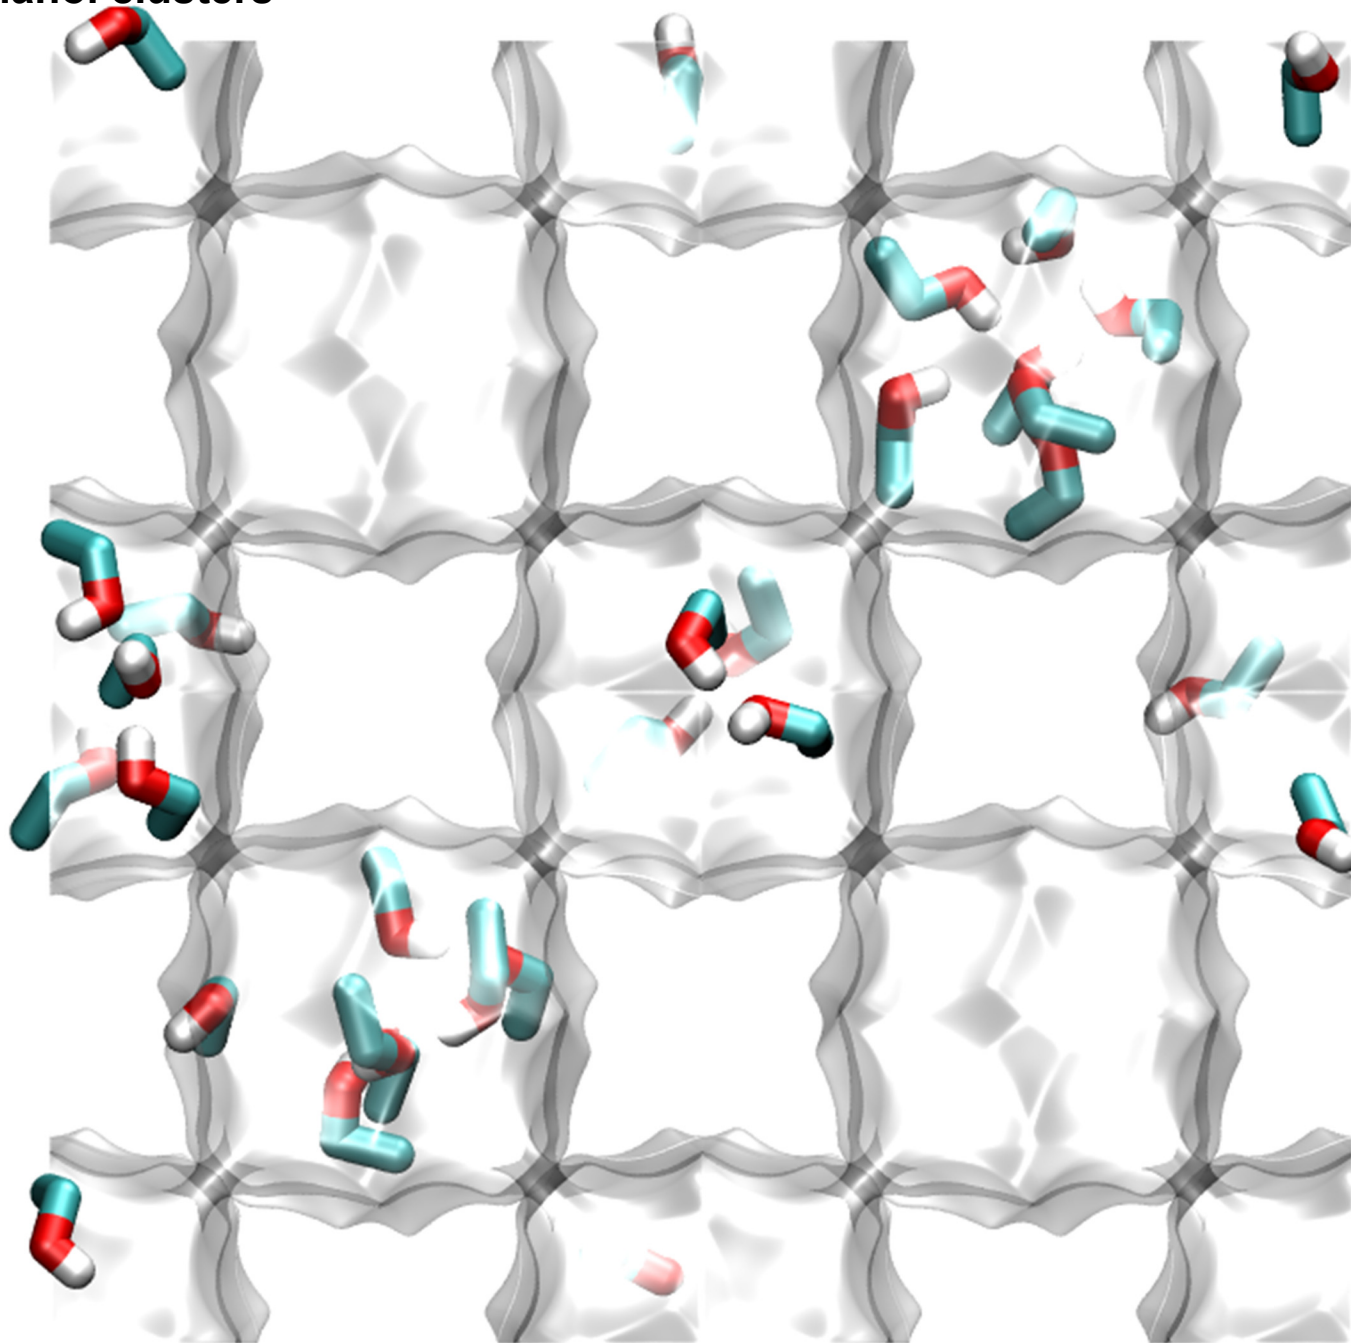

# **1D mesoporous channels**

# BTP-COF landscape

The crystallographic structural information for BTP-COF was obtained from M. Dogru, A. Sonnauer, A. Gavryushin, P. Knochel, T. Bein, A Covalent Organic Framework with 4 nm open pores, Chem. Commun. 47 (2011) 1707-1709.

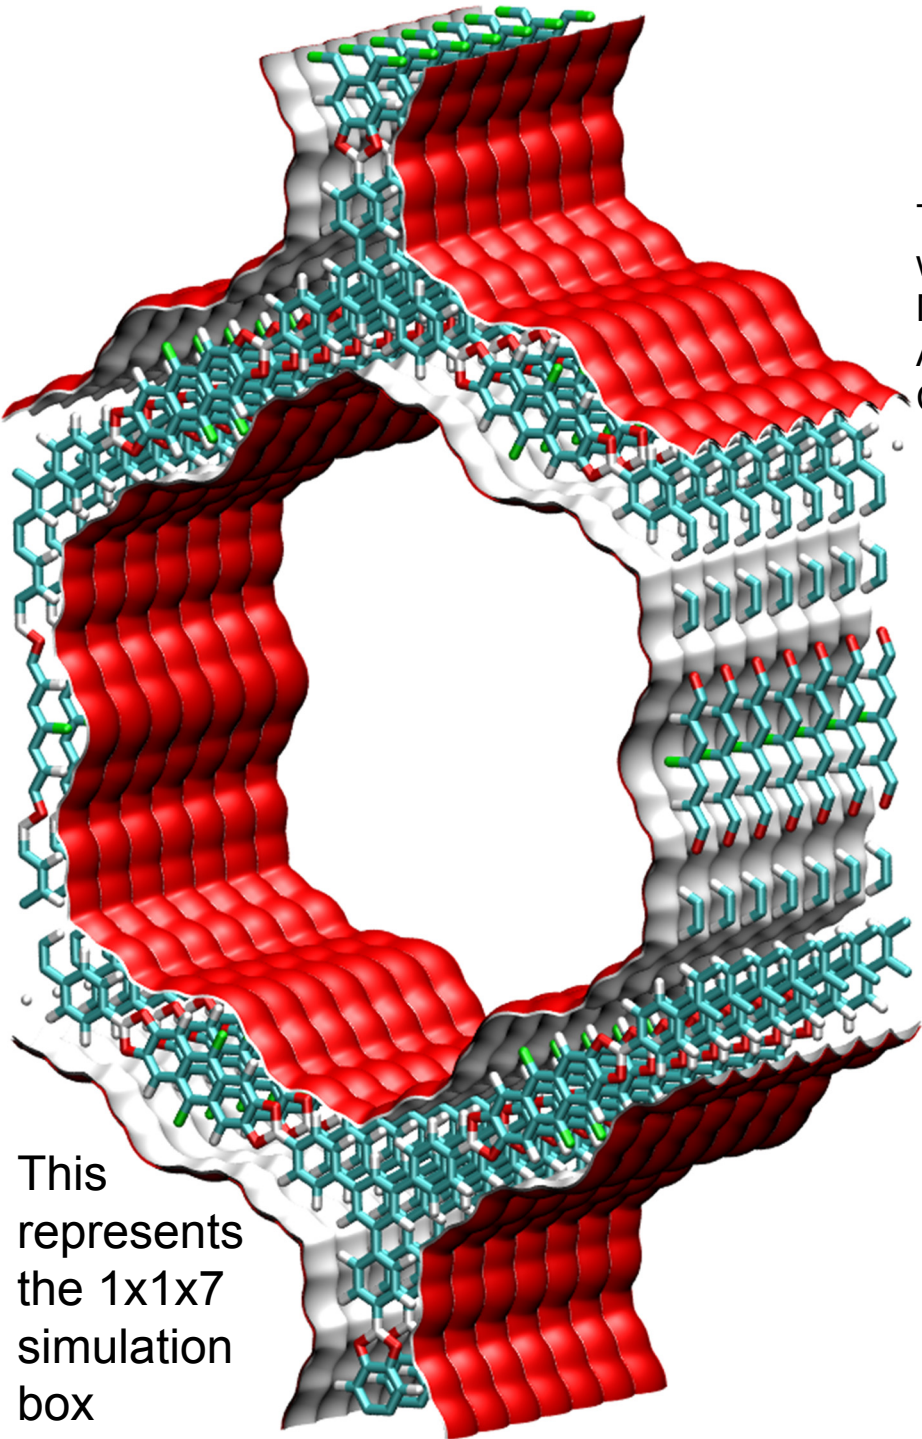

|                                                            | BTP-COF  |
|------------------------------------------------------------|----------|
| $a / \text{\AA}$                                           | 43.65    |
| $b / \text{\AA}$                                           | 75.604   |
| $c / \text{\AA}$                                           | 3.52     |
| Cell volume / $\text{\AA}^3$                               | 11616.4  |
| conversion factor for [molec/uc] to [mol per kg Framework] | 0.3403   |
| conversion factor for [molec/uc] to [kmol/m <sup>3</sup> ] | 0.1900   |
| $\rho$ [kg/m <sup>3</sup> ]                                | 420.0831 |
| MW unit cell [g/mol(framework)]                            | 2938.67  |
| $\phi$ , fractional pore volume                            | 0.752    |
| open space / $\text{\AA}^3/\text{uc}$                      | 8738.7   |
| Pore volume / cm <sup>3</sup> /g                           | 1.791    |
| Surface area / m <sup>2</sup> /g                           |          |
| DeLaunay diameter / $\text{\AA}$                           | 34.26    |

# BTP-COF CBMC simulations of isotherms, and isosteric heats of adsorption

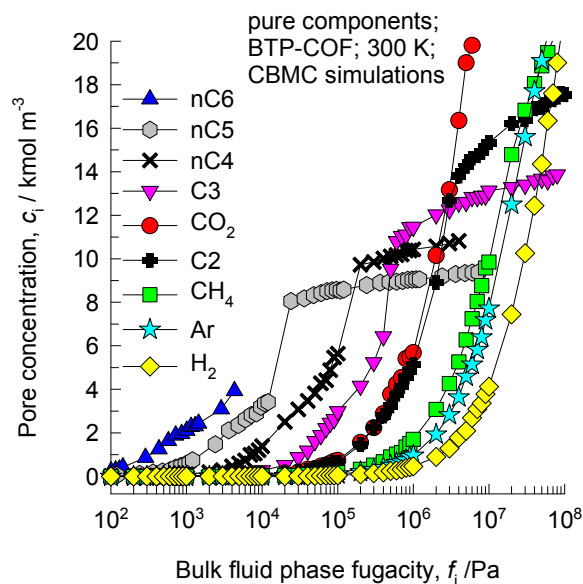

Note that C2 and C3 refer to saturated alkanes

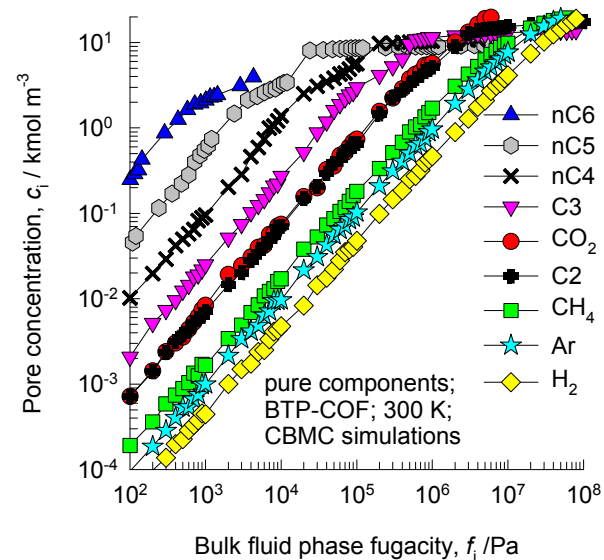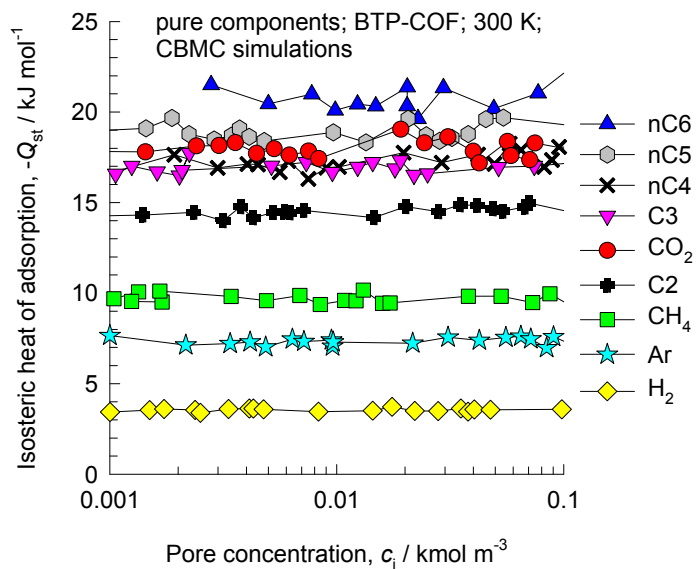

The isosteric heats of adsorption correlate with the Henry coefficients determined from CBMC

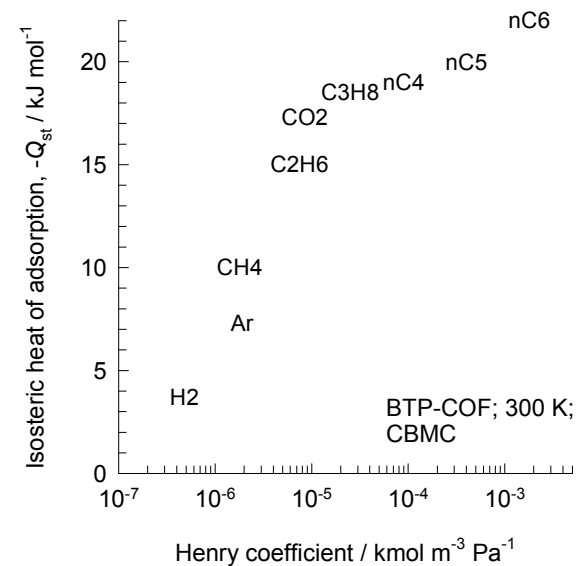

# BTP-COF MD simulations of unary self-, and M-S diffusivities

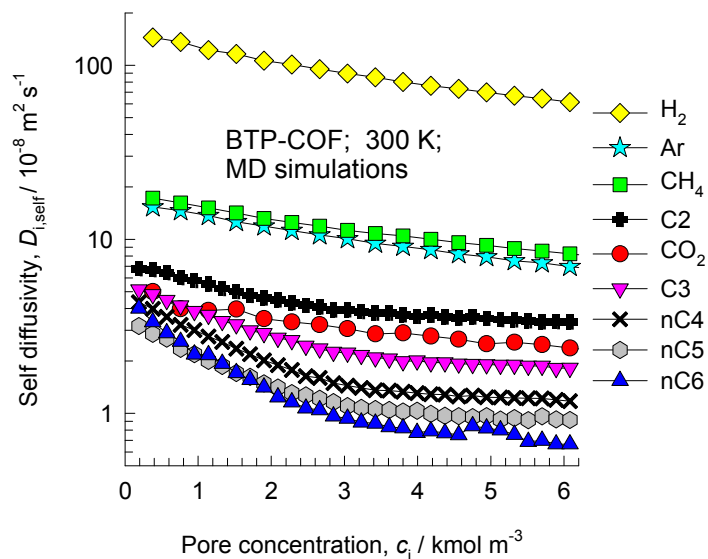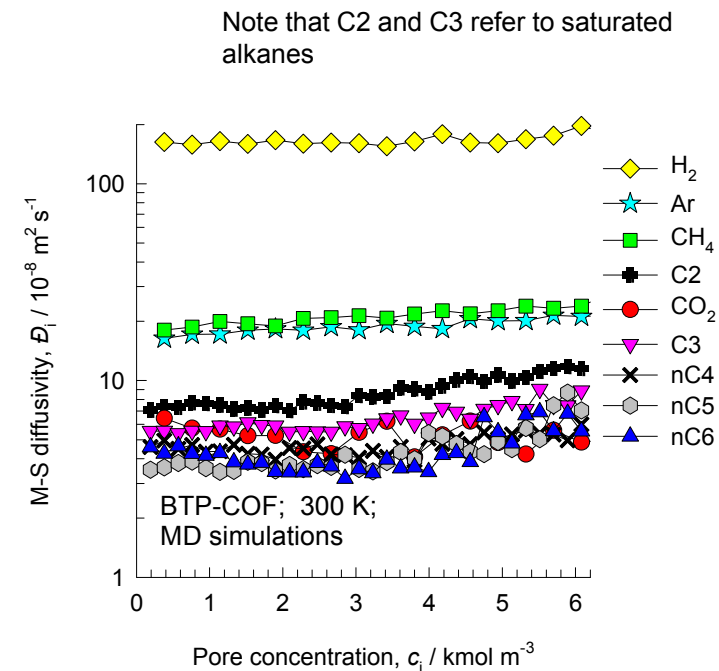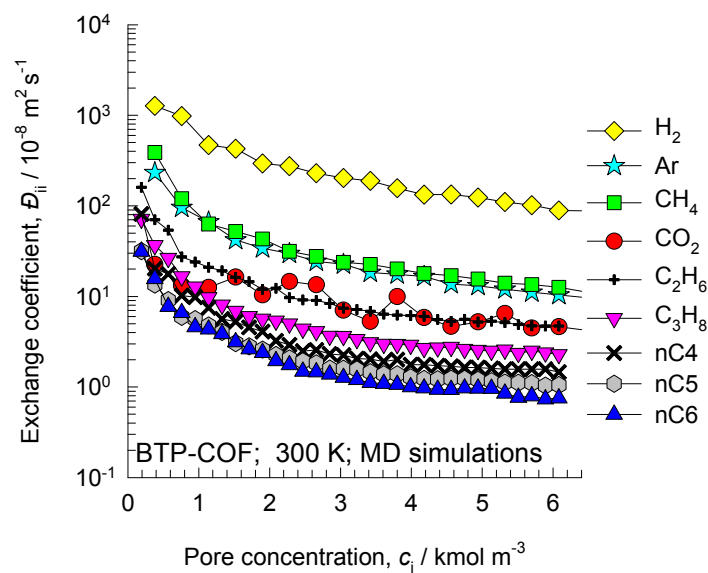

Note that C2 and C3 refer to saturated alkanes

# 1D micro-porous channels

# AFI landscapes

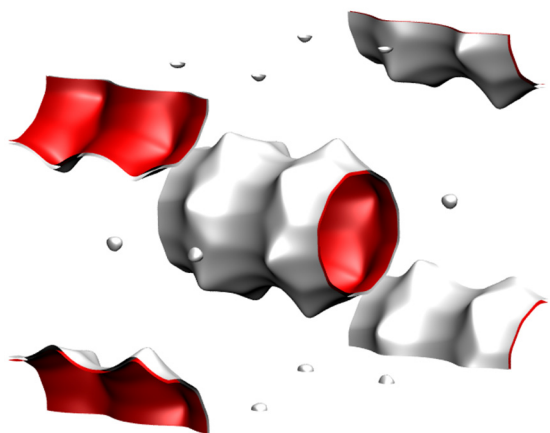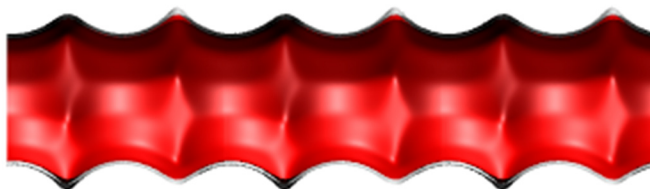

12-ring  
1D channel of AFI

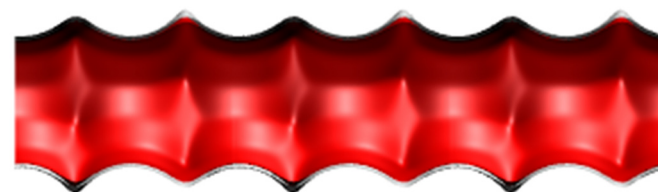

Snapshots showing location of CH<sub>4</sub> and CO<sub>2</sub>

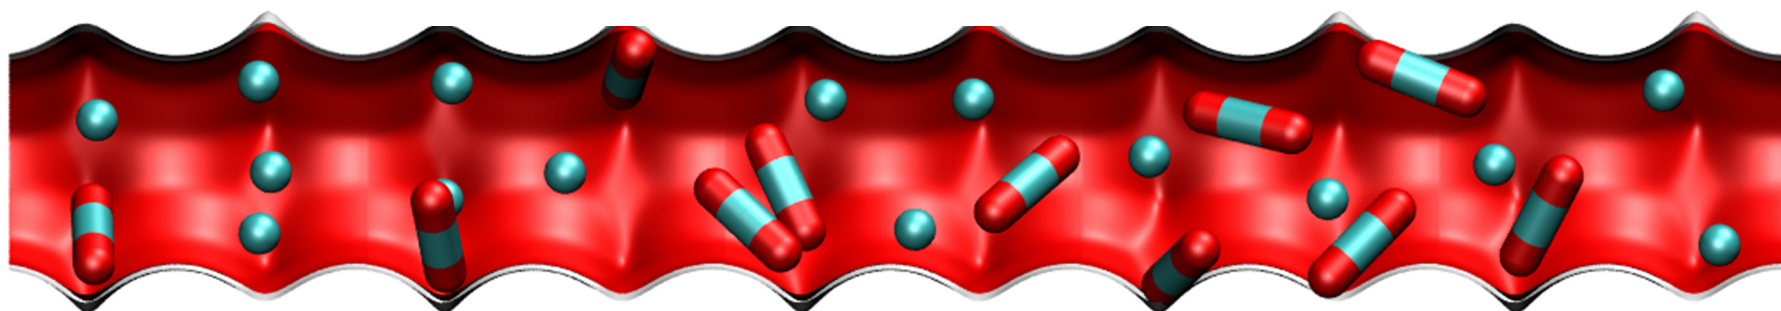

Structural information from: C. Baerlocher, L.B. McCusker, Database of Zeolite Structures, International Zeolite Association, <http://www.iza-structure.org/databases/>

# AFI pore dimensions

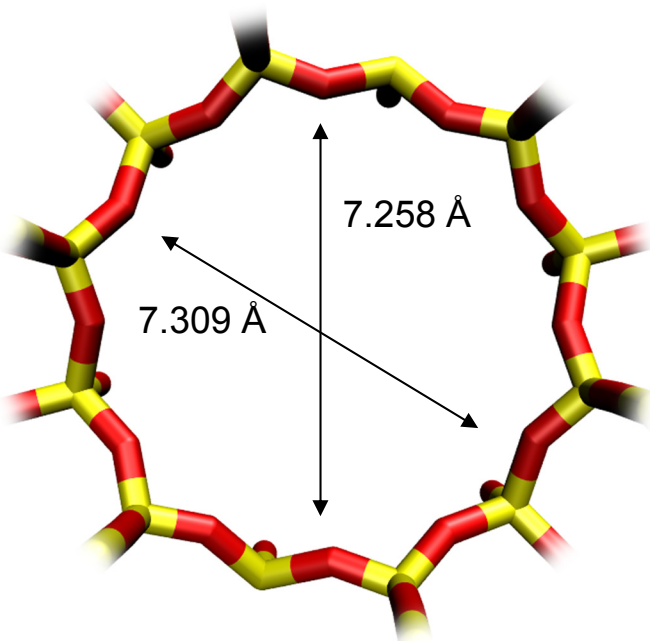

|                                                            | AFI      |
|------------------------------------------------------------|----------|
| $a$ / Å                                                    | 23.774   |
| $b$ / Å                                                    | 13.726   |
| $c$ / Å                                                    | 8.484    |
| Cell volume / Å <sup>3</sup>                               | 2768.515 |
| conversion factor for [molec/uc] to [mol per kg Framework] | 0.3467   |
| conversion factor for [molec/uc] to [kmol/m <sup>3</sup> ] | 2.1866   |
| $\rho$ [kg/m <sup>3</sup> ]                                | 1729.876 |
| MW unit cell [g/mol(framework)]                            | 2884.07  |
| $\phi$ , fractional pore volume                            | 0.274    |
| open space / Å <sup>3</sup> /uc                            | 759.4    |
| Pore volume / cm <sup>3</sup> /g                           | 0.159    |
| Surface area / m <sup>2</sup> /g                           | 466.0    |
| DeLaunay diameter / Å                                      | 7.26     |

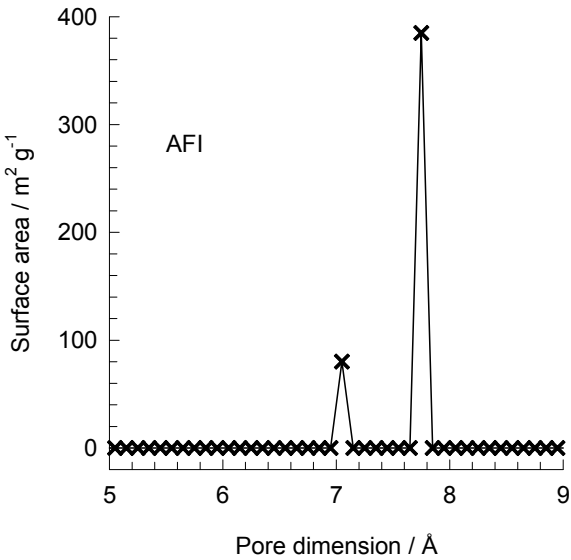

This plot of surface area versus pore dimension is determined using a combination of the DeLaunay triangulation method for pore dimension determination, and the procedure of Dürren for determination of the surface area.

# AFI CBMC simulations of isotherms, and isosteric heats of adsorption

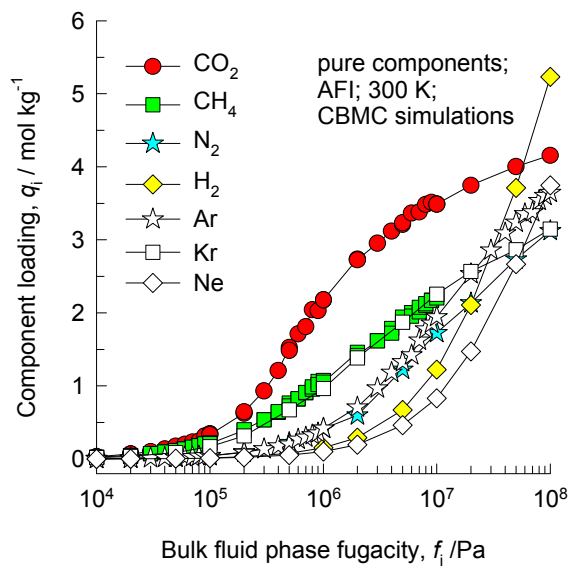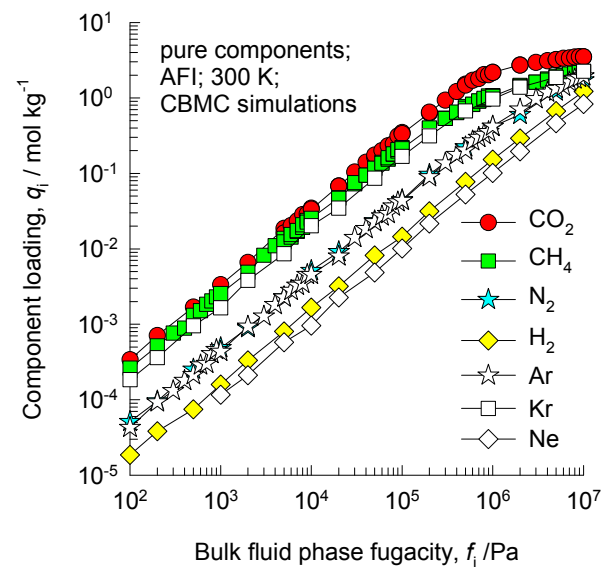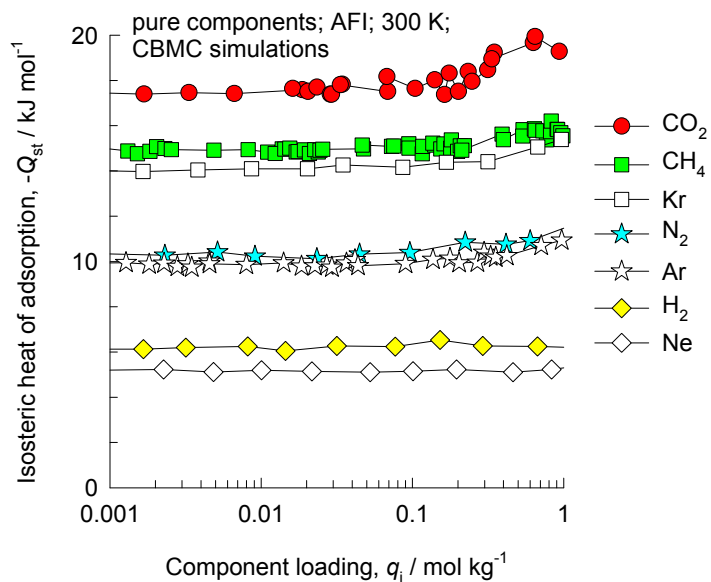

# Influence of Inverse Thermodynamic Factor on diffusivities

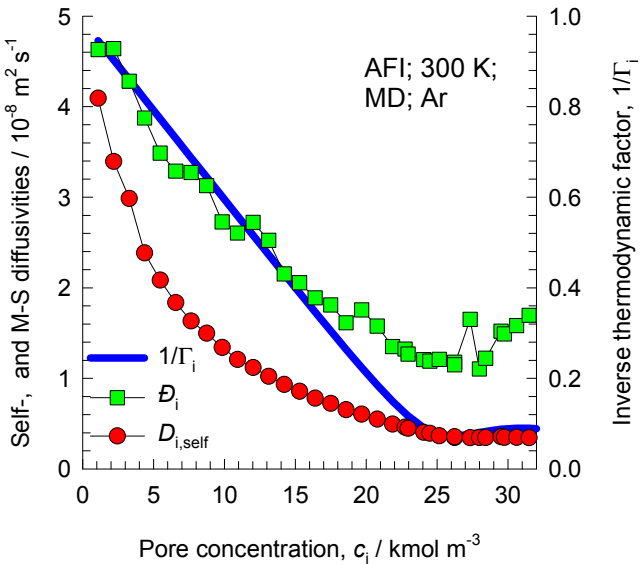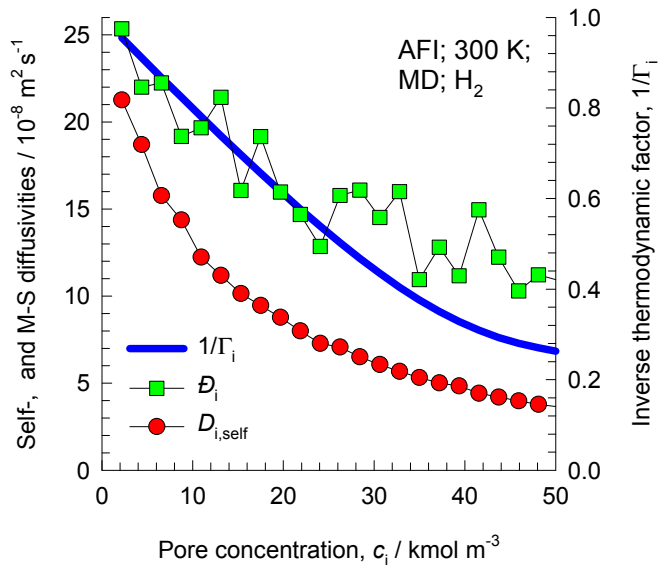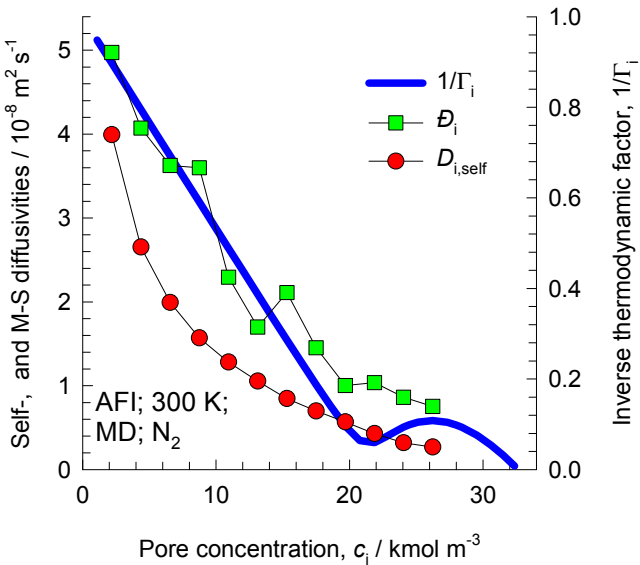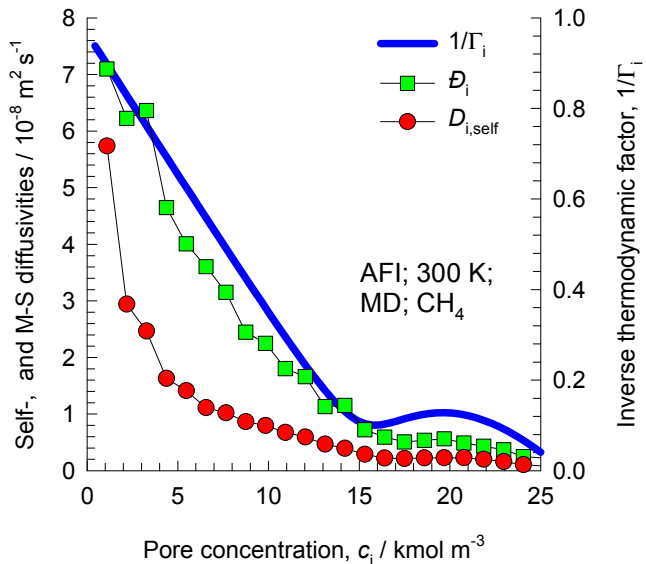

## MTW pore landscape

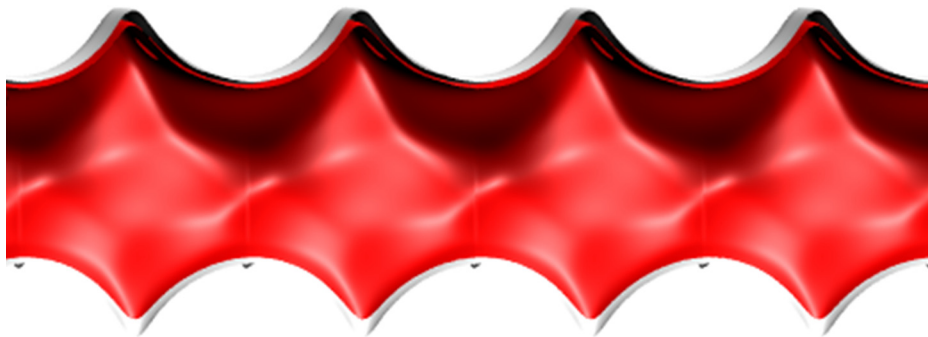

MTW has 1D 12-ring channels

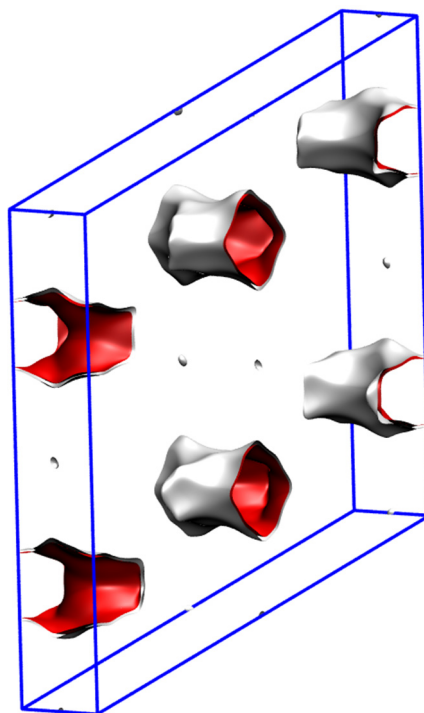

Structural information from: C. Baerlocher, L.B. McCusker,  
Database of Zeolite Structures, International Zeolite Association,  
<http://www.iza-structure.org/databases/>

# MTW pore dimensions

This plot of surface area versus pore dimension is determined using a combination of the DeLaunay triangulation method for pore dimension determination, and the procedure of Dören for determination of the surface area.

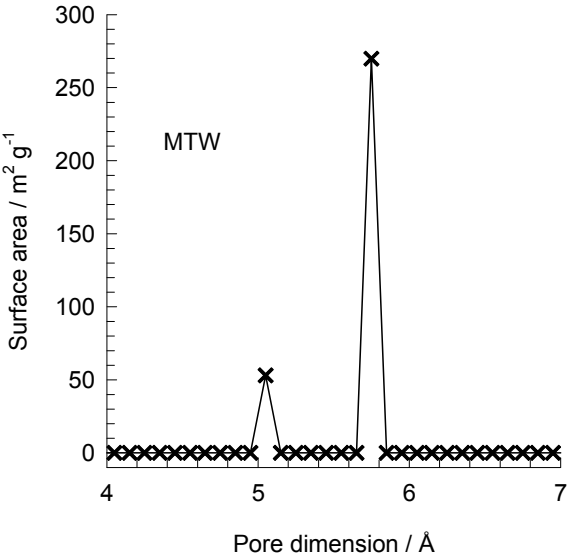

MTW has 1D, 12-ring channels

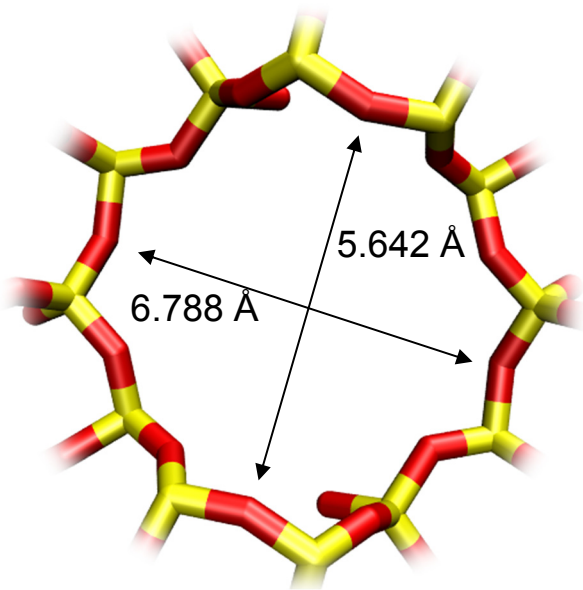

|                                                            | MTW      |
|------------------------------------------------------------|----------|
| <i>a</i> / Å                                               | 24.863   |
| <i>b</i> / Å                                               | 5.012    |
| <i>c</i> / Å                                               | 24.326   |
| Cell volume / Å³                                           | 2887.491 |
| conversion factor for [molec/uc] to [mol per kg Framework] | 0.2972   |
| conversion factor for [molec/uc] to [kmol/m³]              | 2.6759   |
| $\rho$ [kg/m³]                                             | 1935.031 |
| MW unit cell [g/mol(framework)]                            | 3364.749 |
| $\phi$ , fractional pore volume                            | 0.215    |
| open space / Å³/uc                                         | 620.6    |
| Pore volume / cm³/g                                        | 0.111    |
| Surface area / m²/g                                        | 323.0    |
| DeLaunay diameter / Å                                      | 5.69     |

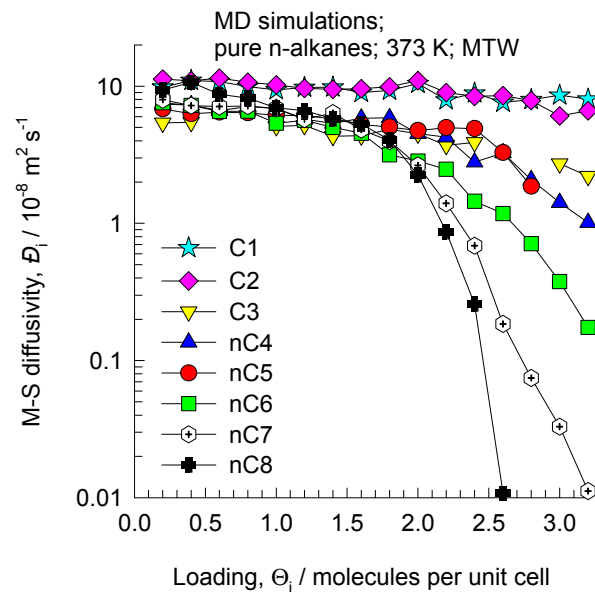

# MTW adsorption of CO<sub>2</sub>

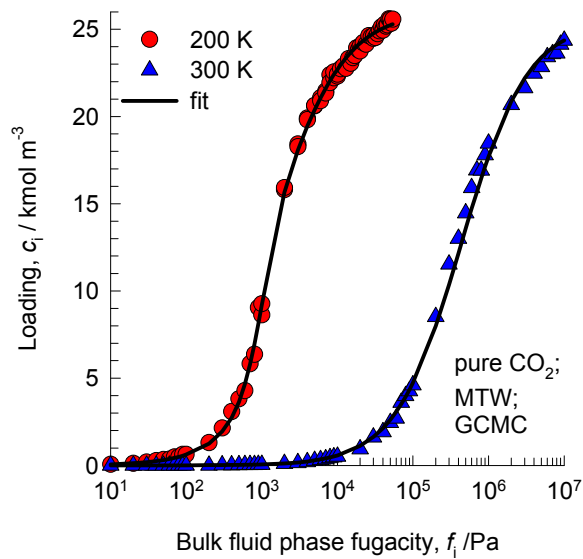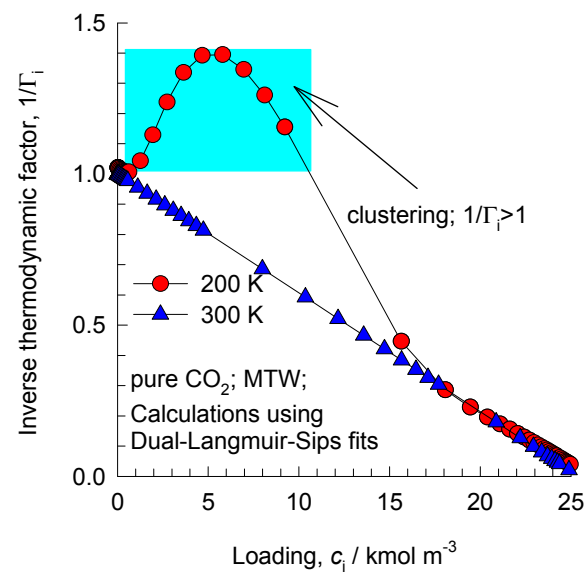

# TON pore landscape

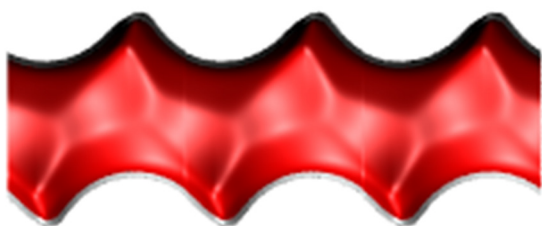

10-ring 1D channel of TON

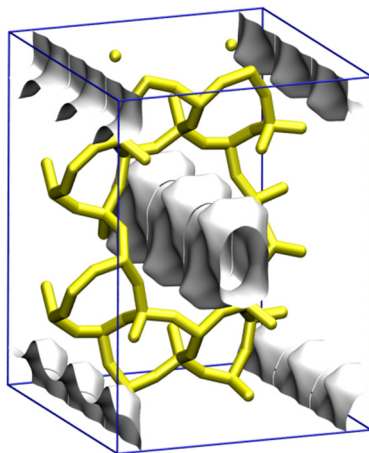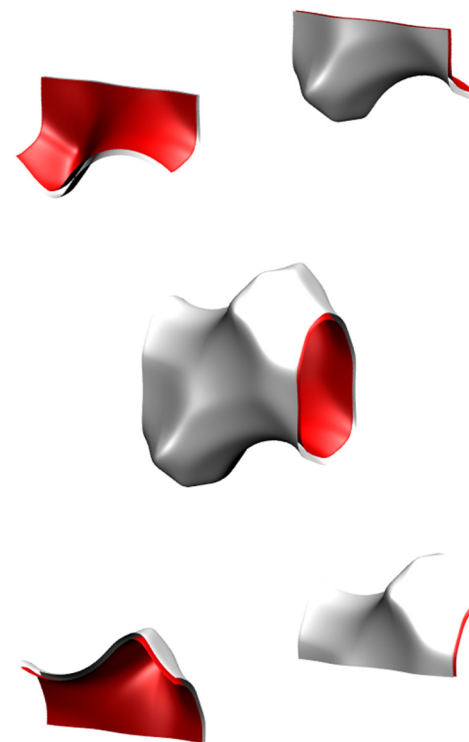

Structural information from: C. Baerlocher, L.B. McCusker, Database of Zeolite Structures, International Zeolite Association,  
<http://www.iza-structure.org/databases/>

# TON pore dimensions

This plot of surface area versus pore dimension is determined using a combination of the DeLaunay triangulation method for pore dimension determination, and the procedure of Dürren for determination of the surface area.

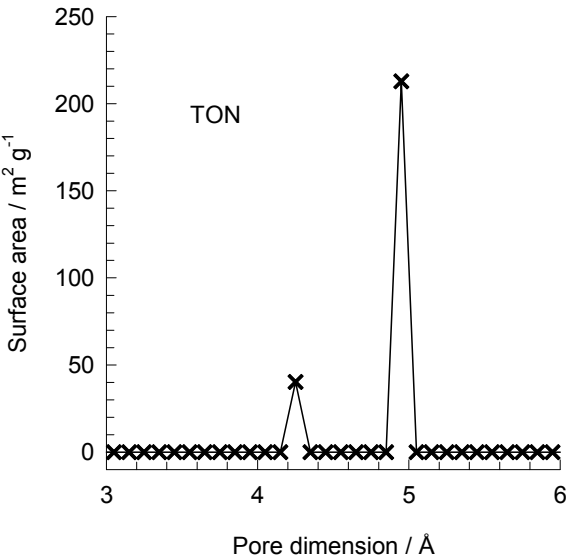

## 10-ring channel of TON

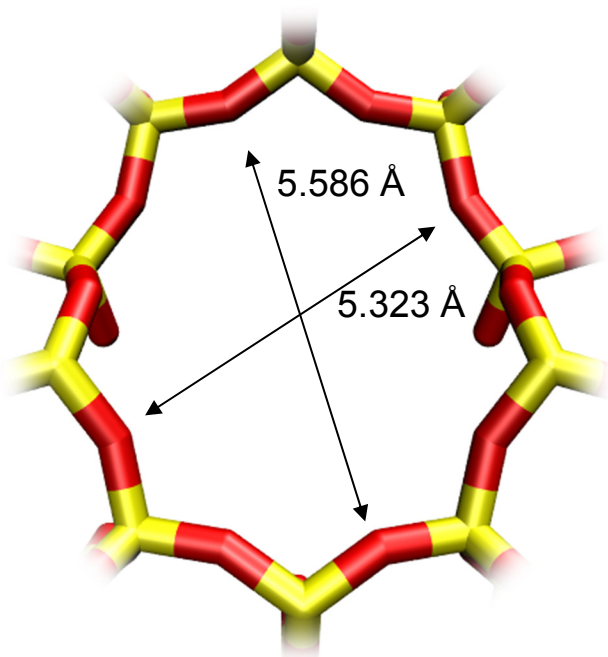

|                                                            | TON      |
|------------------------------------------------------------|----------|
| <i>a</i> /Å                                                | 13.859   |
| <i>b</i> /Å                                                | 17.42    |
| <i>c</i> /Å                                                | 5.038    |
| Cell volume / Å³                                           | 1216.293 |
| conversion factor for [molec/uc] to [mol per kg Framework] | 0.6935   |
| conversion factor for [molec/uc] to [kmol/m³]              | 7.1763   |
| $\rho$ [kg/m3]                                             | 1968.764 |
| MW unit cell [g/mol(framework)]                            | 1442.035 |
| $\phi$ , fractional pore volume                            | 0.190    |
| open space / Å³/uc                                         | 231.4    |
| Pore volume / cm³/g                                        | 0.097    |
| Surface area /m²/g                                         | 253.0    |
| DeLaunay diameter /Å                                       | 4.88     |

# MgMOF-74 pore landscapes

The structural information on MgMOF-74 ( $= \text{Mg}_2(\text{dobdc}) = \text{Mg}(\text{dobdc}) = \text{CPO-27-Mg}$ ) with  $\text{dobdc} = (\text{dobdc}^{4-} = 2,5\text{-dioxido-1,4-benzenedicarboxylate})$ ) were obtained from

- A.Ö. Yazaydin, R.Q. Snurr, T.H. Park, K. Koh, J. Liu, M.D. LeVan, A.I. Benin, P. Jakubczak, M. Lanuza, D.B. Galloway, J.J. Low, R.R. Willis, Screening of Metal-Organic Frameworks for Carbon Dioxide Capture from Flue Gas using a Combined Experimental and Modeling Approach, *J. Am. Chem. Soc.* 131 (2009) 18198-18199.
- D. Britt, H. Furukawa, B. Wang, T.G. Glover, O.M. Yaghi, Highly efficient separation of carbon dioxide by a metal-organic framework replete with open metal sites, *Proc. Natl. Acad. Sci. U.S.A.* 106 (2009) 20637-20640.
- N.L. Rosi, J. Kim, M. Eddaoudi, B. Chen, M. O'Keeffe, O.M. Yaghi, Rod Packings and Metal-Organic Frameworks Constructed from Rod-Shaped Secondary Building Units, *J. Am. Chem. Soc.* 127 (2005) 1504-1518.
- P.D.C. Dietzel, B. Panella, M. Hirscher, R. Blom, H. Fjellvåg, Hydrogen adsorption in a nickel based coordination polymer with open metal sites in the cylindrical cavities of the desolvated framework, *Chem. Commun.* (2006) 959-961.
- P.D.C. Dietzel, V. Besikiotis, R. Blom, Application of metal-organic frameworks with coordinatively unsaturated metal sites in storage and separation of methane and carbon dioxide, *J. Mater. Chem.* 19 (2009) 7362-7370.
- S.R. Caskey, A.G. Wong-Foy, A.J. Matzger, Dramatic Tuning of Carbon Dioxide Uptake via Metal Substitution in a Coordination Polymer with Cylindrical Pores, *J. Am. Chem. Soc.* 130 (2008) 10870-10871.

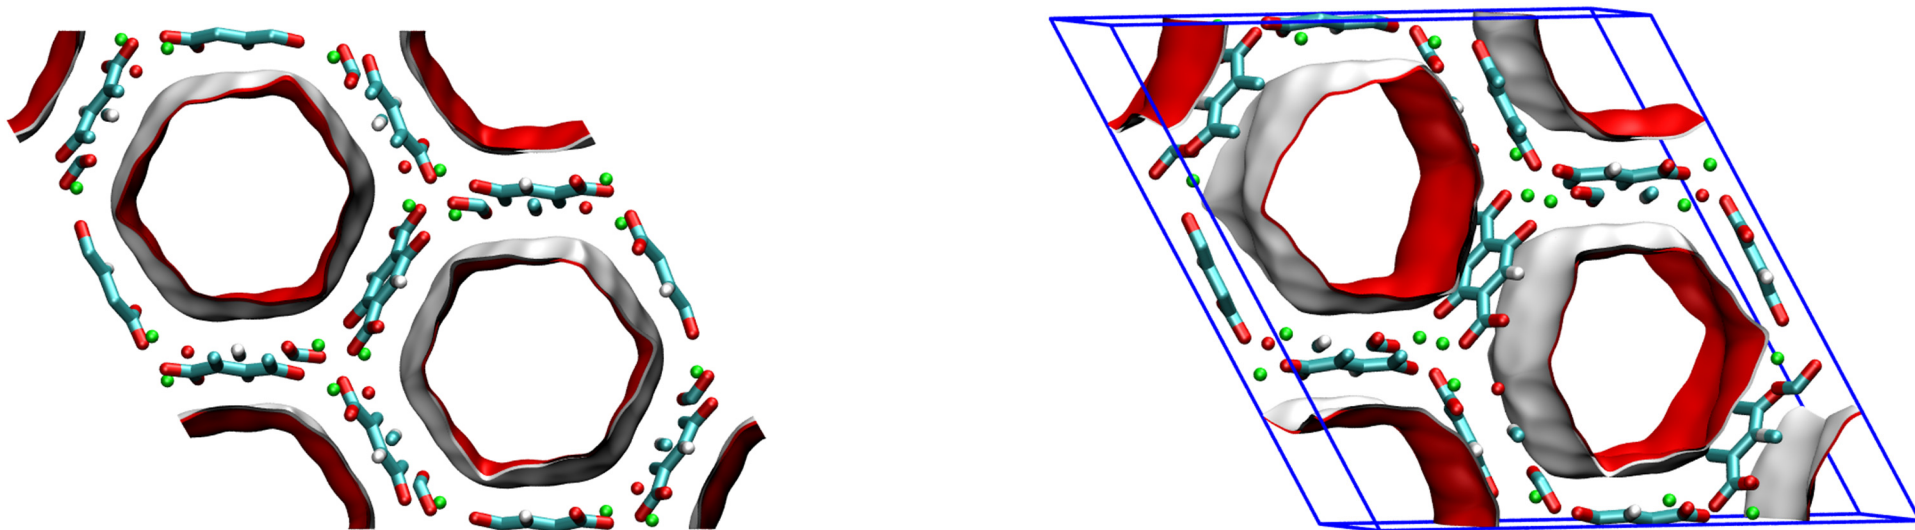

# MgMOF-74 pore dimensions

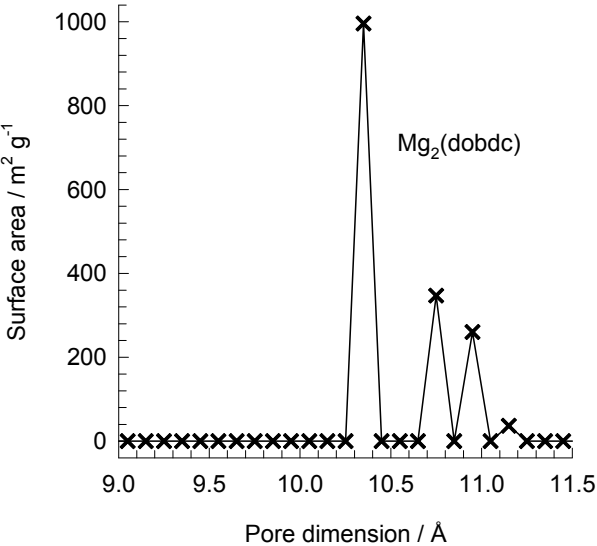

This plot of surface area versus pore dimension is determined using a combination of the DeLaunay triangulation method for pore dimension determination, and the procedure of Dürren for determination of the surface area.

|                                                            |          |
|------------------------------------------------------------|----------|
|                                                            | MgMOF-74 |
| <i>a</i> / Å                                               | 25.8621  |
| <i>b</i> / Å                                               | 25.8621  |
| <i>c</i> / Å                                               | 6.91427  |
| Cell volume / Å <sup>3</sup>                               | 4005.019 |
| conversion factor for [molec/uc] to [mol per kg Framework] | 0.4580   |
| conversion factor for [molec/uc] to [kmol/m <sup>3</sup> ] | 0.5856   |
| $\rho$ [kg/m <sup>3</sup> ]                                | 905.367  |
| MW unit cell [g/mol(framework)]                            | 2183.601 |
| $\phi$ , fractional pore volume                            | 0.708    |
| open space / Å <sup>3</sup> /uc                            | 2835.6   |
| Pore volume / cm <sup>3</sup> /g                           | 0.782    |
| Surface area / m <sup>2</sup> /g                           | 1640.0   |
| DeLaunay diameter / Å                                      | 10.66    |

# MgMOF-74 isotherms and isosteric heats of adsorption from experiments

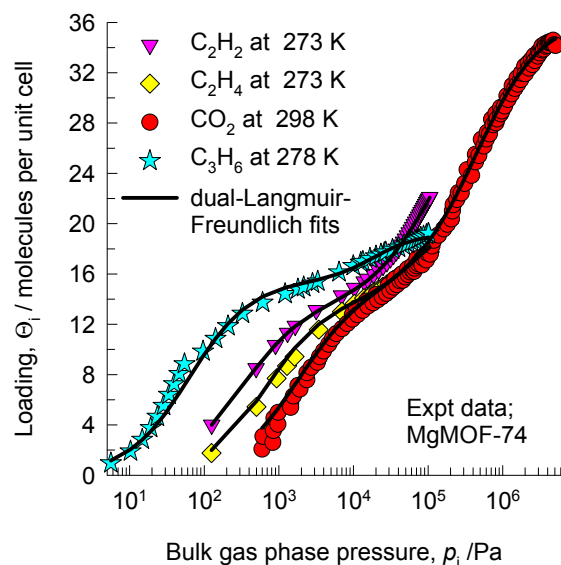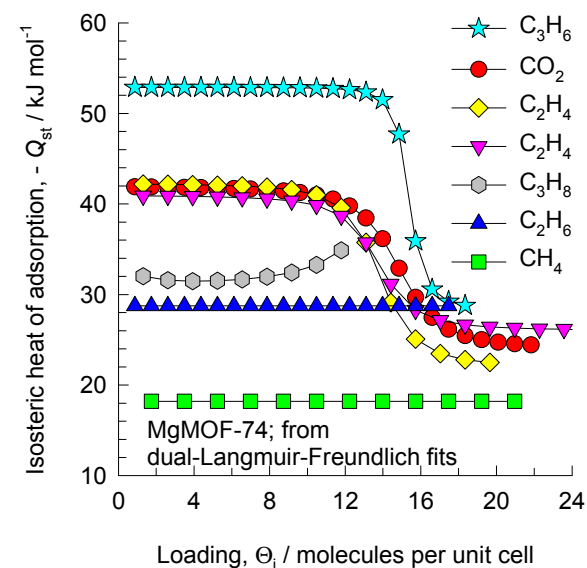

The pure component isotherms, with fits, and isosteric heats of adsorption are those reported by: He, Y.; Krishna, R.; Chen, B. Metal-Organic Frameworks with Potential for Energy-Efficient Adsorptive Separation of Light Hydrocarbons. *Energy Environ. Sci.* 2012, 5, 9107-9120.

The unary diffusivities are taken to be identical to those in MgMOF-74; the Maxwell-Stefan diffusivities are the ones presented by: Krishna, R.; van Baten, J.M. Investigating the Relative Influences of Molecular Dimensions and Binding Energies on Diffusivities of Guest Species Inside Nanoporous Crystalline Materials *J. Phys. Chem. C* 2012, 116, 23556-23568.

# MgMOF-74 dependence of diffusivity on the isosteric heats of adsorption

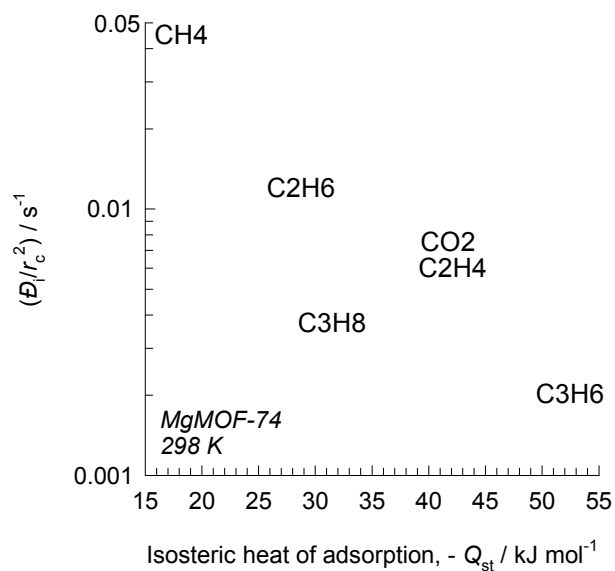

The pure component isotherms, with fits, and isosteric heats of adsorption are those reported by: He, Y.; Krishna, R.; Chen, B. Metal-Organic Frameworks with Potential for Energy-Efficient Adsorptive Separation of Light Hydrocarbons. *Energy Environ. Sci.* 2012, 5, 9107-9120.

The unary diffusivities Maxwell-Stefan diffusivities are the ones presented by: Krishna, R.; van Baten, J.M. Investigating the Relative Influences of Molecular Dimensions and Binding Energies on Diffusivities of Guest Species Inside Nanoporous Crystalline Materials *J. Phys. Chem. C* 2012, 116, 23556-23568.

# ZnMOF-74 pore landscapes

The structural information on ZnMOF-74 ( $= \text{Zn}_2(\text{dobdc}) = \text{Zn}(\text{dobdc})$  CPO-27-Zn) with  $\text{dobdc} = (\text{dobdc}^{4-} = 2,5\text{-dioxido-1,4-benzenedicarboxylate})$ ) were obtained from

- A.Ö. Yazaydın, R.Q. Snurr, T.H. Park, K. Koh, J. Liu, M.D. LeVan, A.I. Benin, P. Jakubczak, M. Lanuza, D.B. Galloway, J.J. Low, R.R. Willis, Screening of Metal-Organic Frameworks for Carbon Dioxide Capture from Flue Gas using a Combined Experimental and Modeling Approach, *J. Am. Chem. Soc.* 131 (2009) 18198-18199.
- D. Britt, H. Furukawa, B. Wang, T.G. Glover, O.M. Yaghi, Highly efficient separation of carbon dioxide by a metal-organic framework replete with open metal sites, *Proc. Natl. Acad. Sci. U.S.A.* 106 (2009) 20637-20640.
- N.L. Rosi, J. Kim, M. Eddaoudi, B. Chen, M. O’Keeffe, O.M. Yaghi, Rod Packings and Metal-Organic Frameworks Constructed from Rod-Shaped Secondary Building Units, *J. Am. Chem. Soc.* 127 (2005) 1504-1518.
- P.D.C. Dietzel, B. Panella, M. Hirscher, R. Blom, H. Fjellvåg, Hydrogen adsorption in a nickel based coordination polymer with open metal sites in the cylindrical cavities of the desolvated framework, *Chem. Commun.* (2006) 959-961.
- P.D.C. Dietzel, V. Besikiotis, R. Blom, Application of metal–organic frameworks with coordinatively unsaturated metal sites in storage and separation of methane and carbon dioxide, *J. Mater. Chem.* 19 (2009) 7362-7370.
- S.R. Caskey, A.G. Wong-Foy, A.J. Matzger, Dramatic Tuning of Carbon Dioxide Uptake via Metal Substitution in a Coordination Polymer with Cylindrical Pores, *J. Am. Chem. Soc.* 130 (2008) 10870-10871.

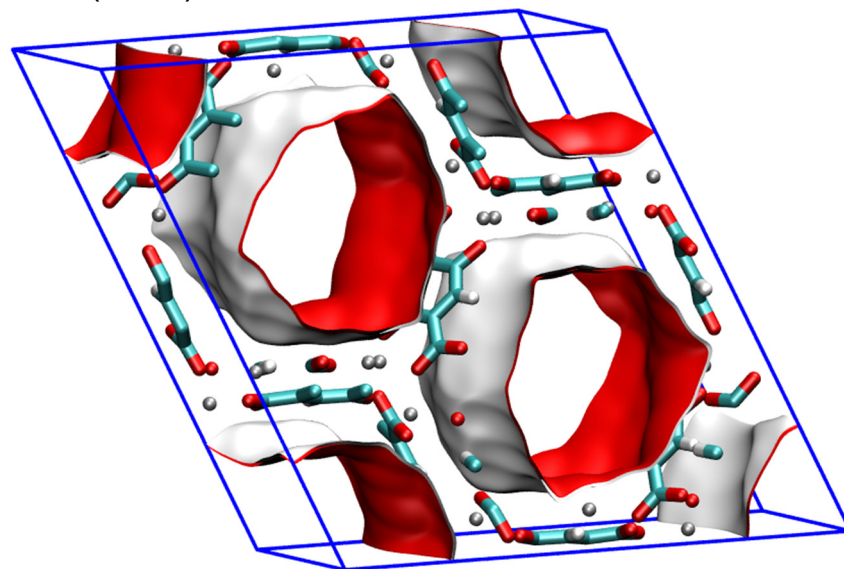

# ZnMOF-74 pore dimensions

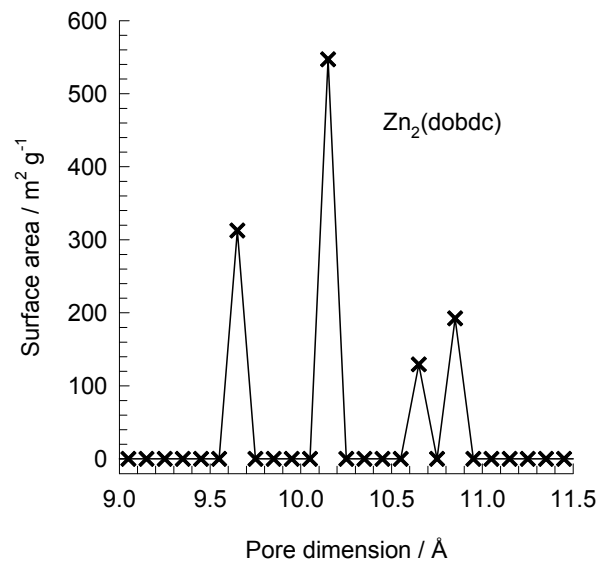

This plot of surface area versus pore dimension is determined using a combination of the DeLaunay triangulation method for pore dimension determination, and the procedure of Dören for determination of the surface area.

|                                                            |          |
|------------------------------------------------------------|----------|
|                                                            | ZnMOF-74 |
| <i>a</i> /Å                                                | 25.9322  |
| <i>b</i> /Å                                                | 25.9322  |
| <i>c</i> /Å                                                | 6.8365   |
| Cell volume / Å <sup>3</sup>                               | 3981.467 |
| conversion factor for [molec/uc] to [mol per kg Framework] | 0.3421   |
| conversion factor for [molec/uc] to [kmol/m <sup>3</sup> ] | 0.5881   |
| $\rho$ [kg/m <sup>3</sup> ]                                | 1219.304 |
| MW unit cell [g/mol(framework)]                            | 2923.473 |
| $\phi$ , fractional pore volume                            | 0.709    |
| open space / Å <sup>3</sup> /uc                            | 2823.8   |
| Pore volume / cm <sup>3</sup> /g                           | 0.582    |
| Surface area /m <sup>2</sup> /g                            | 1176.0   |
| DeLaunay diameter /Å                                       | 9.49     |

# ZnMOF-74 CBMC simulations of isotherms, and isosteric heats of adsorption

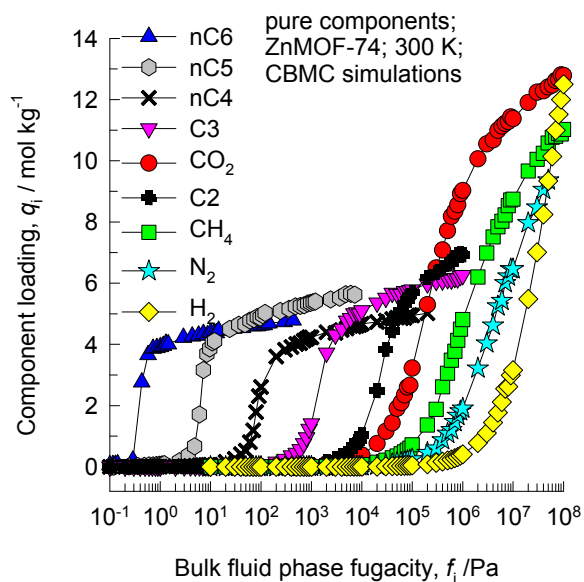

Note that C2 and C3 above refer to saturated alkanes.

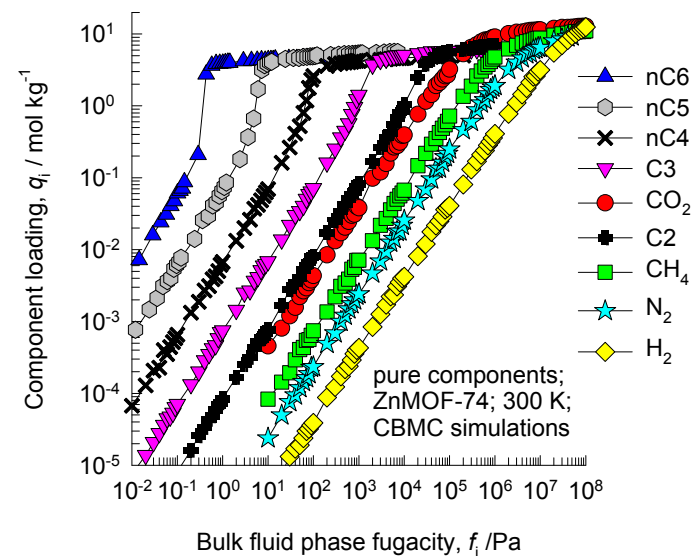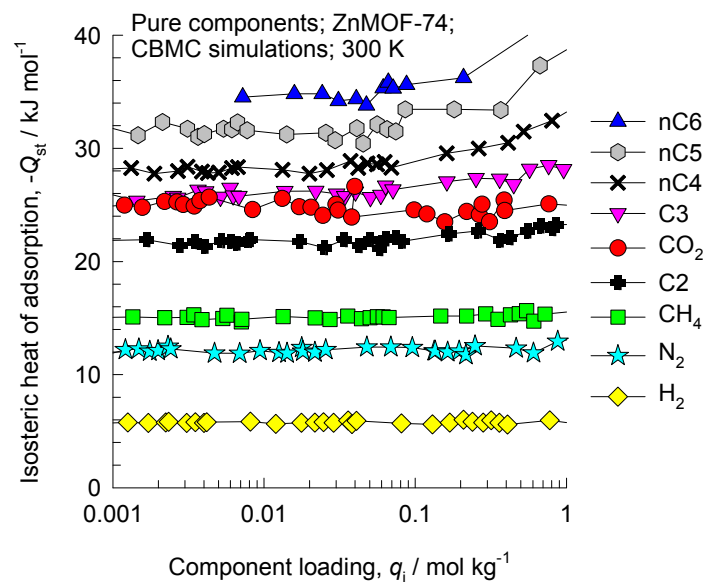

# Influence of Inverse Thermodynamic Factor on diffusivities

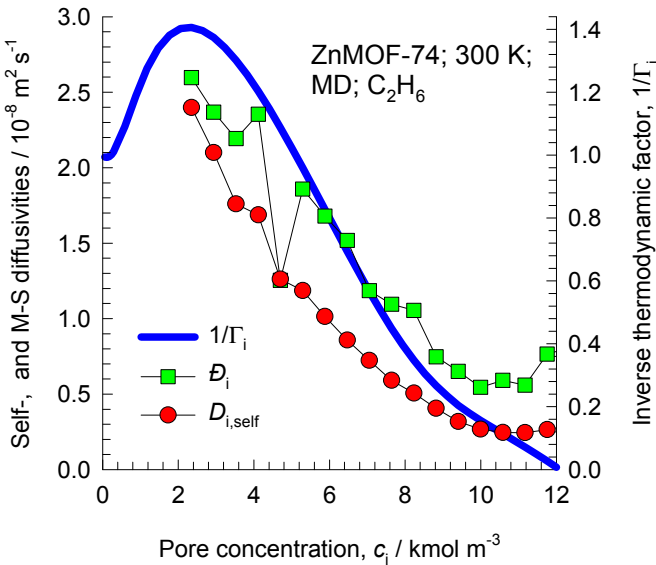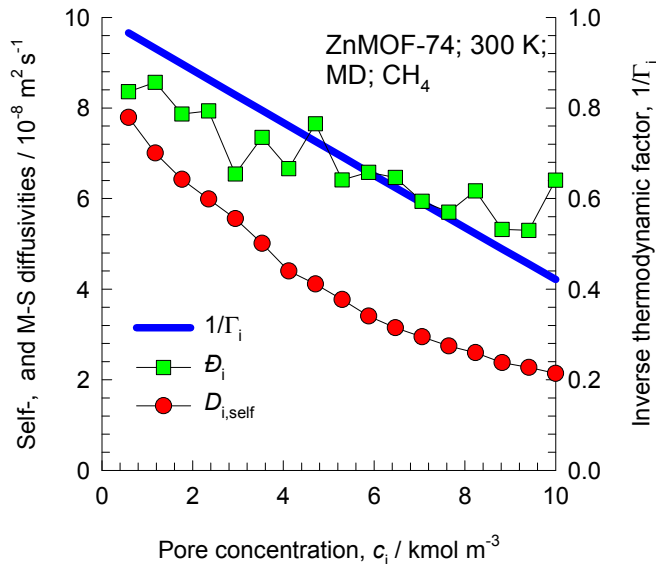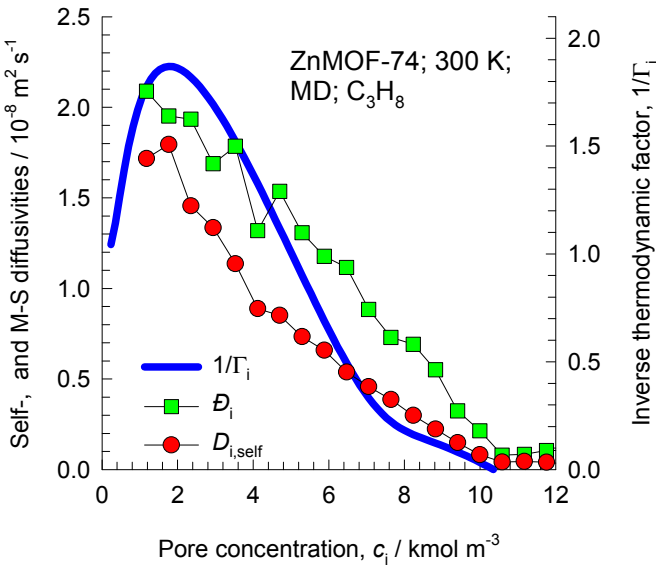

# NiMOF-74 pore landscapes

The structural information on NiMOF-74 ( = Ni<sub>2</sub>(dobdc) = Ni(dobdc = CPO-27-Ni) with dobdc = (dobdc<sup>4-</sup> = 2,5-dioxido-1,4-benzenedicarboxylate)) were obtained from

- A.Ö. Yazaydin, R.Q. Snurr, T.H. Park, K. Koh, J. Liu, M.D. LeVan, A.I. Benin, P. Jakubczak, M. Lanuza, D.B. Galloway, J.J. Low, R.R. Willis, Screening of Metal-Organic Frameworks for Carbon Dioxide Capture from Flue Gas using a Combined Experimental and Modeling Approach, *J. Am. Chem. Soc.* 131 (2009) 18198-18199.
- D. Britt, H. Furukawa, B. Wang, T.G. Glover, O.M. Yaghi, Highly efficient separation of carbon dioxide by a metal-organic framework replete with open metal sites, *Proc. Natl. Acad. Sci. U.S.A.* 106 (2009) 20637-20640.
- N.L. Rosi, J. Kim, M. Eddaoudi, B. Chen, M. O'Keeffe, O.M. Yaghi, Rod Packings and Metal-Organic Frameworks Constructed from Rod-Shaped Secondary Building Units, *J. Am. Chem. Soc.* 127 (2005) 1504-1518.
- P.D.C. Dietzel, B. Panella, M. Hirscher, R. Blom, H. Fjellvåg, Hydrogen adsorption in a nickel based coordination polymer with open metal sites in the cylindrical cavities of the desolvated framework, *Chem. Commun.* (2006) 959-961.
- P.D.C. Dietzel, V. Besikiotis, R. Blom, Application of metal-organic frameworks with coordinatively unsaturated metal sites in storage and separation of methane and carbon dioxide, *J. Mater. Chem.* 19 (2009) 7362-7370.
- S.R. Caskey, A.G. Wong-Foy, A.J. Matzger, Dramatic Tuning of Carbon Dioxide Uptake via Metal Substitution in a Coordination Polymer with Cylindrical Pores, *J. Am. Chem. Soc.* 130 (2008) 10870-10871.

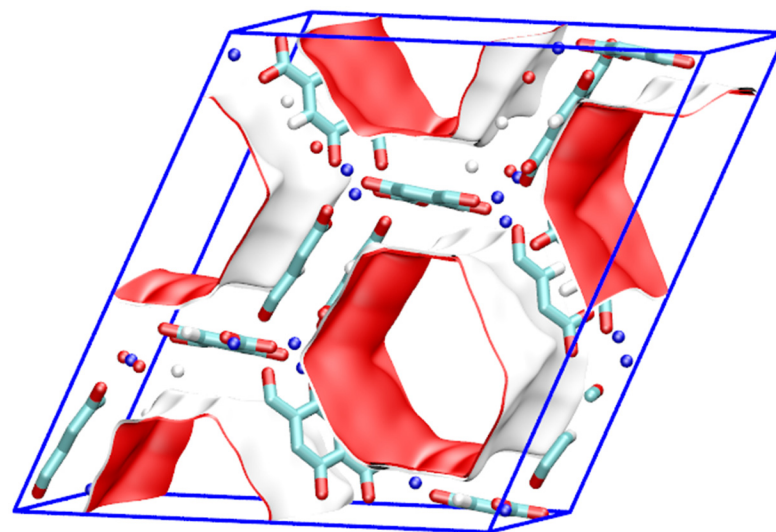

# NiMOF-74 pore dimensions

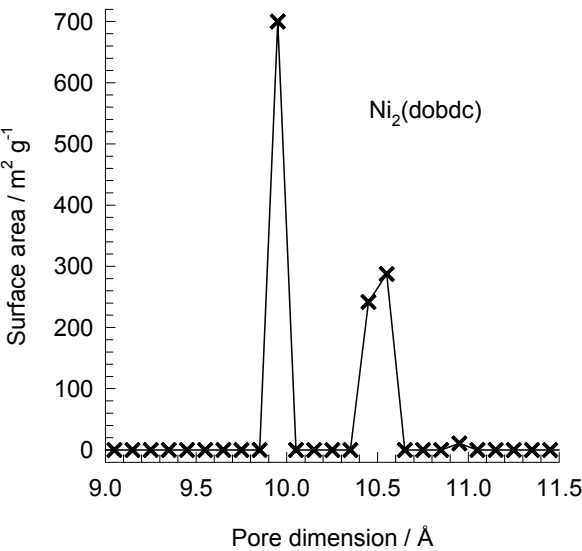

This plot of surface area versus pore dimension is determined using a combination of the DeLaunay triangulation method for pore dimension determination, and the procedure of Dören for determination of the surface area.

|                                                            | NiMOF-74 |
|------------------------------------------------------------|----------|
| <i>a</i> / Å                                               | 25.7856  |
| <i>b</i> / Å                                               | 25.7856  |
| <i>c</i> / Å                                               | 6.7701   |
| Cell volume / Å³                                           | 3898.344 |
| conversion factor for [molec/uc] to [mol per kg Framework] | 0.3568   |
| conversion factor for [molec/uc] to [kmol/m³]              | 0.6133   |
| $\rho$ [kg/m3]                                             | 1193.811 |
| MW unit cell [g/mol(framework)]                            | 2802.592 |
| $\phi$ , fractional pore volume                            | 0.695    |
| open space / Å³/uc                                         | 2707.6   |
| Pore volume / cm³/g                                        | 0.582    |
| Surface area /m²/g                                         | 1239.0   |
| DeLaunay diameter / Å                                      | 9.80     |

# NiMOF-74 isotherms and isosteric heats of adsorption from experiments

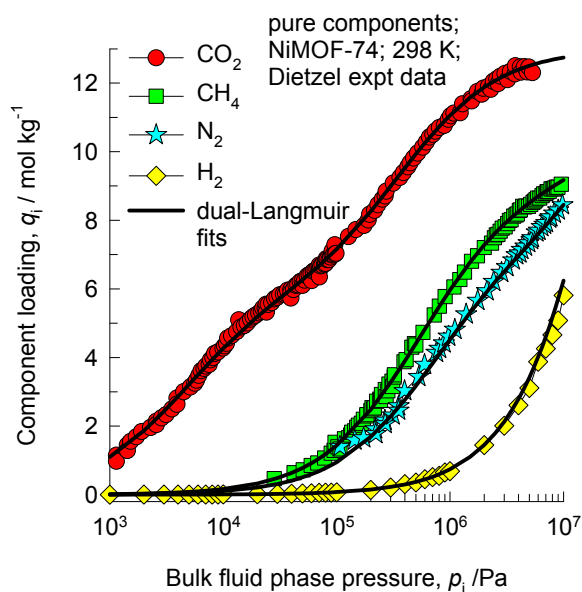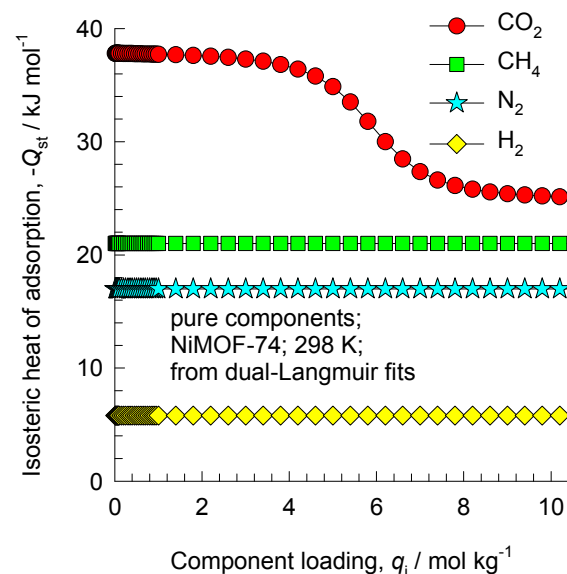

The pure component isotherms, with fits, and isosteric heats of adsorption are those reported by:

Krishna, R.; van Baten, J.M. Investigating the Relative Influences of Molecular Dimensions and Binding Energies on Diffusivities of Guest Species Inside Nanoporous Crystalline Materials J. Phys. Chem. C 2012, 116, 23556-23568.

# NiMOF-74: Analysis of membrane permeation experiments

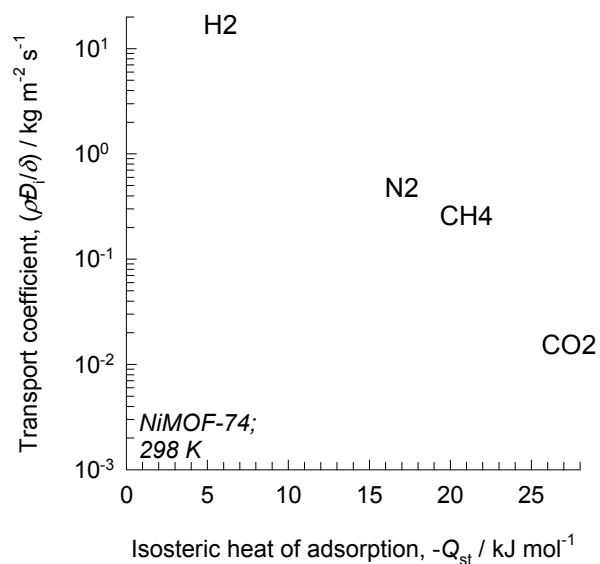

The membrane transport coefficients are the ones presented by:

Krishna, R.; van Baten, J.M. Investigating the Relative Influences of Molecular Dimensions and Binding Energies on Diffusivities of Guest Species Inside Nanoporous Crystalline Materials J. Phys. Chem. C 2012, 116, 23556-23568.

# FeMOF-74 pore landscapes

The structural information on FeMOF-74 ( $= \text{Fe}_2(\text{dobdc}) = \text{Fe}(\text{dobdc}) = \text{CPO-27-Fe}$ ) with  $\text{dobdc} = (\text{dobdc}^{4-} = 2,5\text{-dioxido-1,4-benzenedicarboxylate})$ ) was obtained from

Bloch et al. E.D. Bloch, L. Murray, W.L. Queen, S.M. Chavan, S.N. Maximoff, J.P. Bigi, R. Krishna, V.K. Peterson, F. Grandjean, G.J. Long, B. Smit, S. Bordiga, C.M. Brown, J.R. Long, Selective Binding of  $\text{O}_2$  over  $\text{N}_2$  in a Redox-Active Metal-Organic Framework with Open Iron(II) Coordination Sites, *J. Am. Chem. Soc.* 133 (2011) 14814-14822.

E.D. Bloch, W.L. Queen, R. Krishna, J.M. Zadrozny, C.M. Brown, J.R. Long, Hydrocarbon Separations in a Metal-Organic Framework with Open Iron(II) Coordination Sites, *Science* 335 (2012) 1606-1610.

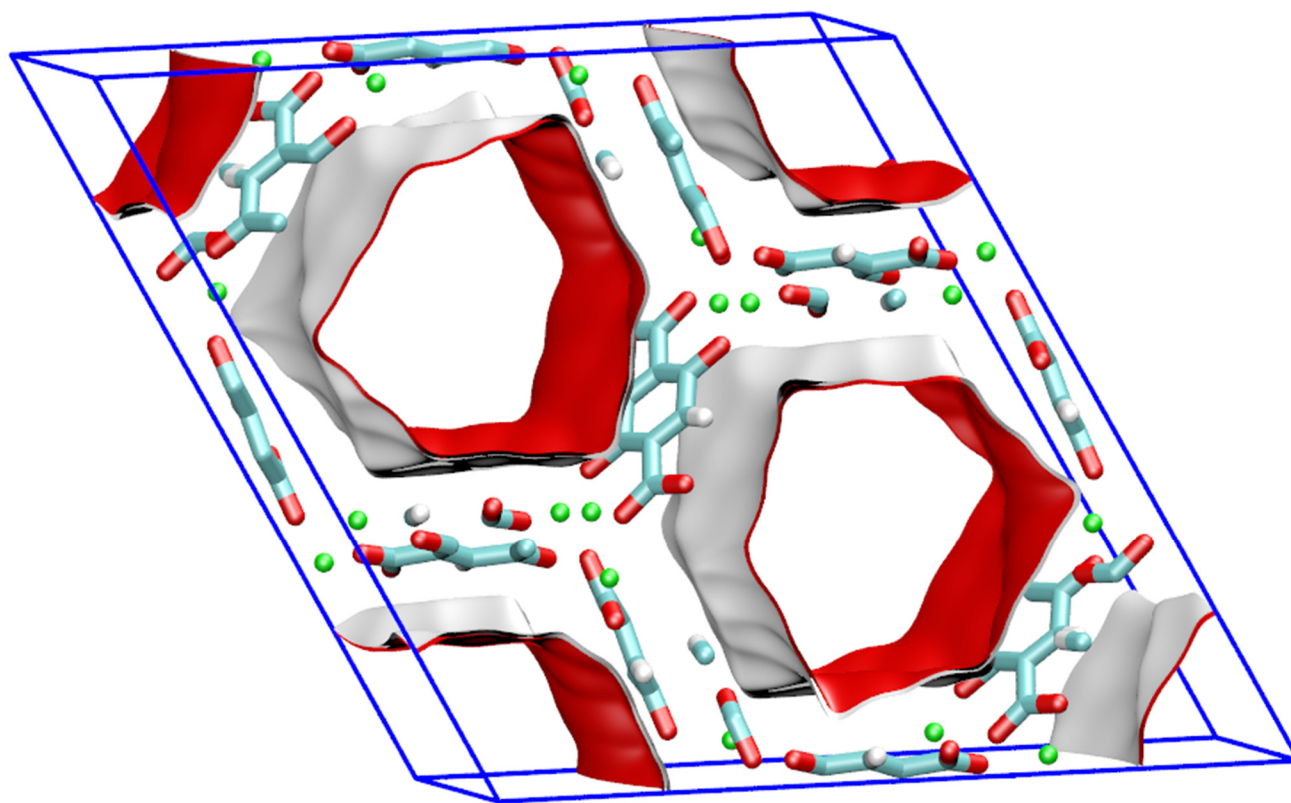

# FeMOF-74 pore dimensions

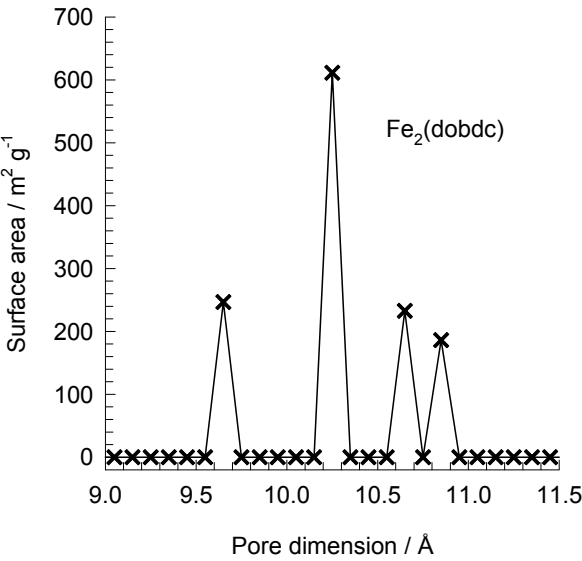

This plot of surface area versus pore dimension is determined using a combination of the DeLaunay triangulation method for pore dimension determination, and the procedure of Dürren for determination of the surface area.

|                                                            |          |
|------------------------------------------------------------|----------|
|                                                            | FeMOF-74 |
| <i>a</i> / Å                                               | 26.1627  |
| <i>b</i> / Å                                               | 26.1627  |
| <i>c</i> / Å                                               | 6.8422   |
| Cell volume / Å <sup>3</sup>                               | 4055.94  |
| conversion factor for [molec/uc] to [mol per kg Framework] | 0.3635   |
| conversion factor for [molec/uc] to [kmol/m <sup>3</sup> ] | 0.5807   |
| $\rho$ [kg/m <sup>3</sup> ]                                | 1126.434 |
| MW unit cell [g/mol (framework)]                           | 2751.321 |
| $\phi$ , fractional pore volume                            | 0.705    |
| open space / Å <sup>3</sup> /uc                            | 2859.7   |
| Pore volume / cm <sup>3</sup> /g                           | 0.626    |
| Surface area /m <sup>2</sup> /g                            | 1277.4   |
| DeLaunay diameter / Å                                      | 11.12    |

# FeMOF-74 isotherms and isosteric heats of adsorption from experiments

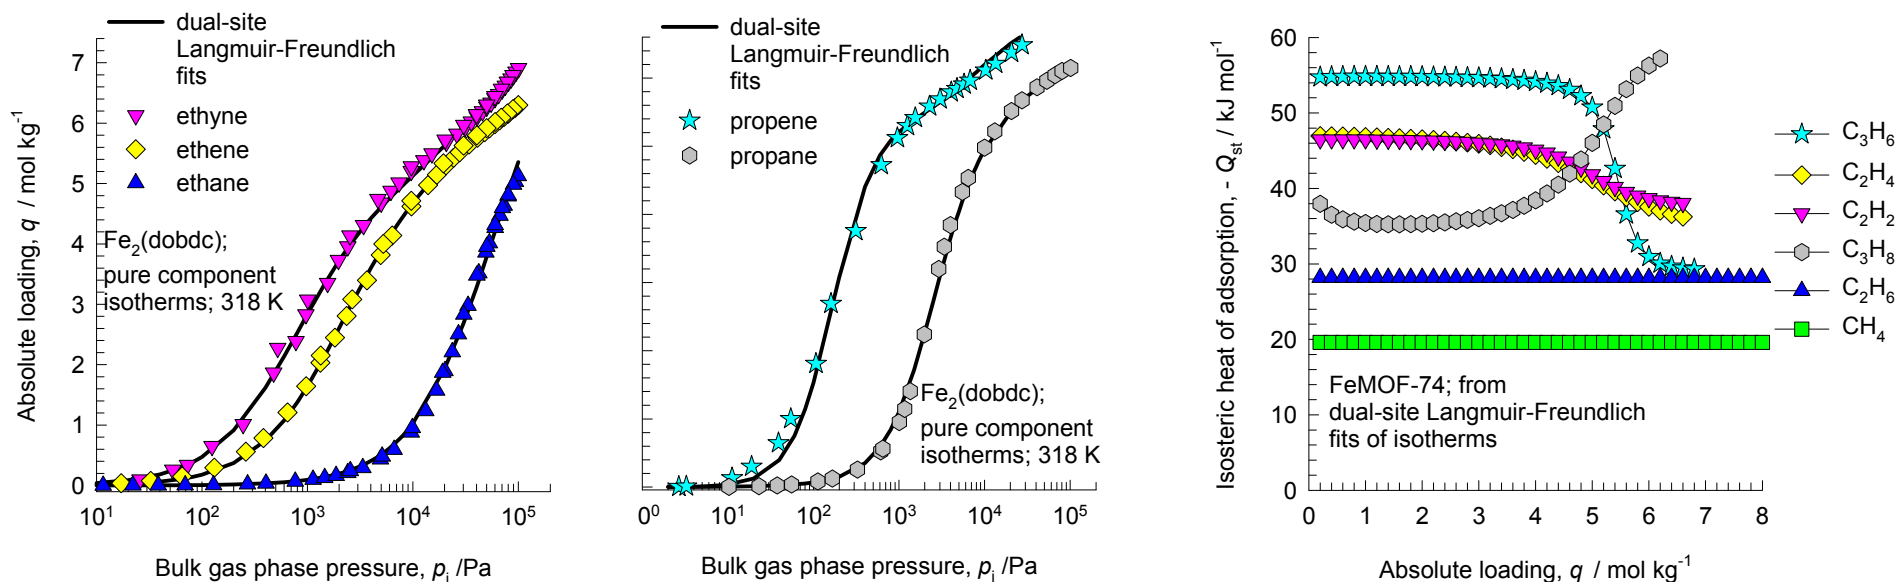

The pure component isotherms, with fits, and isosteric heats of adsorption are those reported by:  
He, Y.; Krishna, R.; Chen, B. Metal-Organic Frameworks with Potential for Energy-Efficient Adsorptive Separation of Light Hydrocarbons. Energy Environ. Sci. 2012, 5, 9107-9120.

# CoMOF-74 pore landscapes

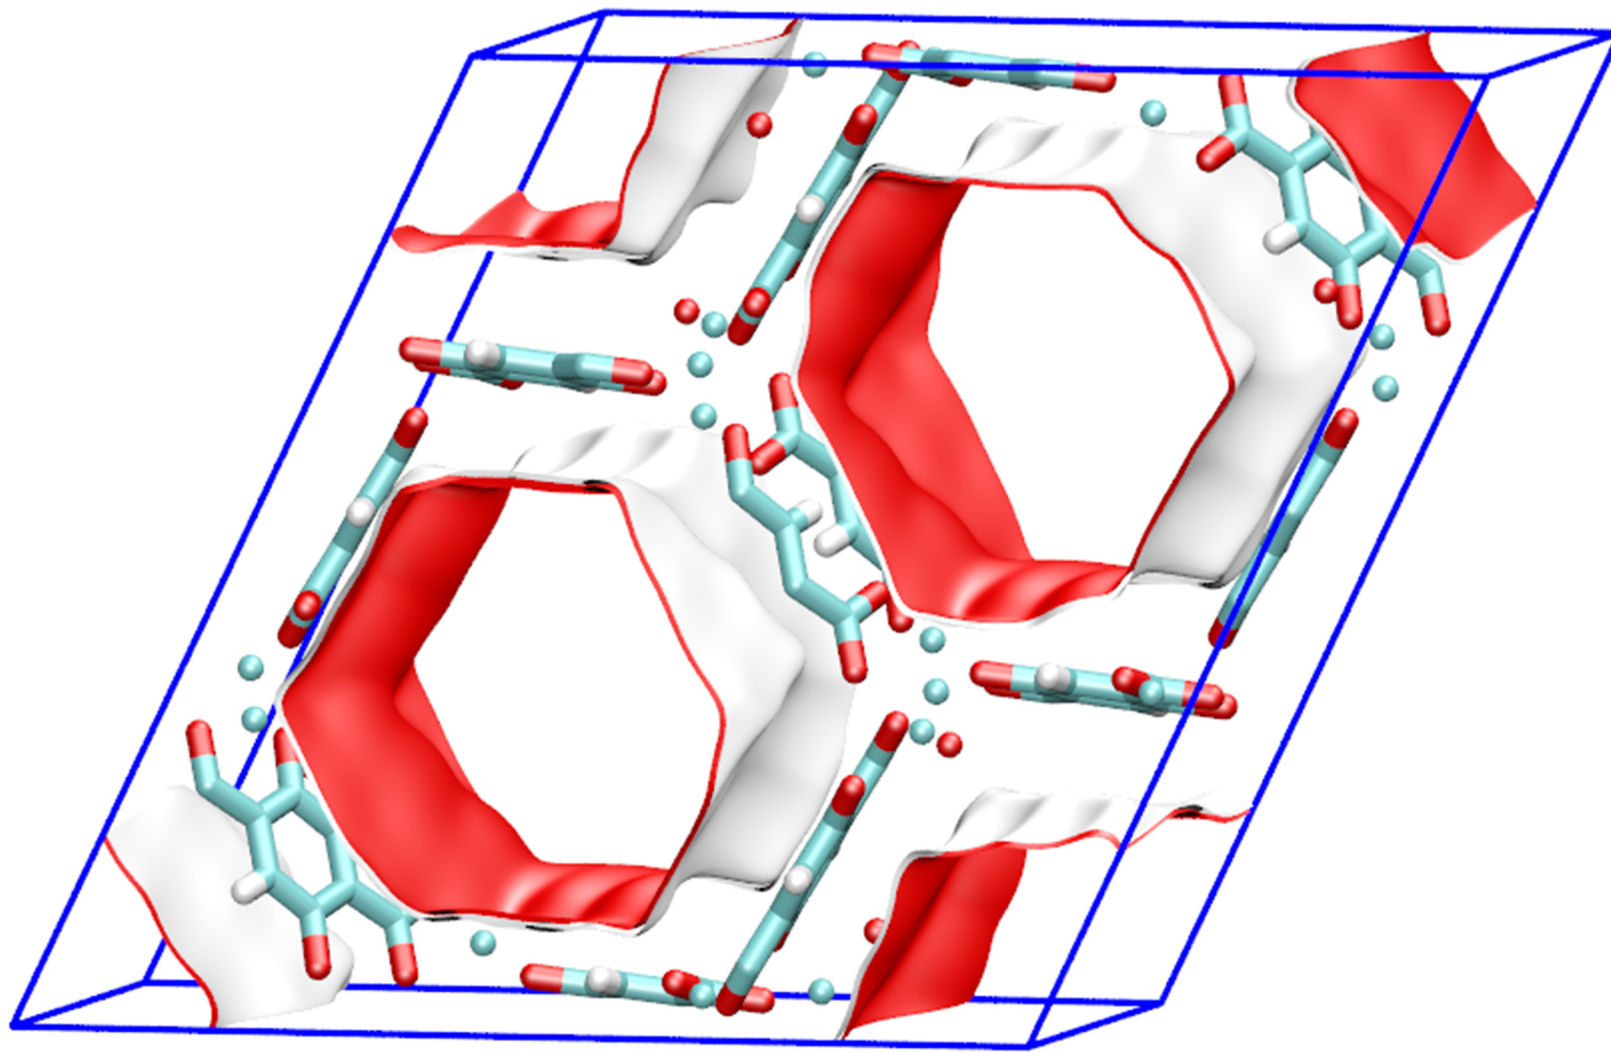

# CoMOF-74 pore dimensions

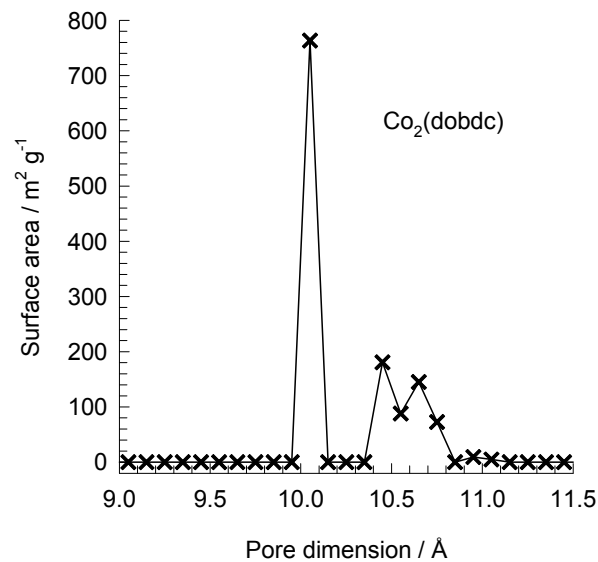

This plot of surface area versus pore dimension is determined using a combination of the DeLaunay triangulation method for pore dimension determination, and the procedure of Dürren for determination of the surface area. The computational details will be described in detail in a forthcoming publication.

|                                                            |          |
|------------------------------------------------------------|----------|
|                                                            | CoMOF-74 |
| <i>a</i> /Å                                                | 25.885   |
| <i>b</i> /Å                                                | 25.885   |
| <i>c</i> /Å                                                | 6.8058   |
| Cell volume / Å³                                           | 3949.173 |
| conversion factor for [molec/uc] to [mol per kg Framework] | 0.3563   |
| conversion factor for [molec/uc] to [kmol/m³]              | 0.5945   |
| $\rho$ [kg/m3]                                             | 1180.261 |
| MW unit cell [g/mol(framework)]                            | 2806.908 |
| $\phi$ , fractional pore volume                            | 0.707    |
| open space / Å³/uc                                         | 2793.1   |
| Pore volume / cm³/g                                        | 0.599    |
| Surface area /m²/g                                         | 1274.0   |
| DeLaunay diameter /Å                                       | 9.52     |

# CoMOF-74 isotherms and isosteric heats of adsorption from experiments

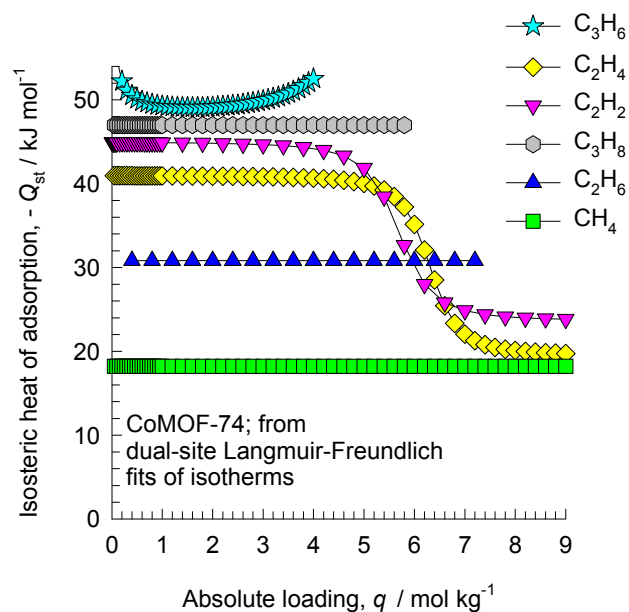

The pure component isotherms, with fits, and isosteric heats of adsorption are those reported by:  
He, Y.; Krishna, R.; Chen, B. Metal-Organic Frameworks with Potential for Energy-Efficient Adsorptive Separation of Light Hydrocarbons. *Energy Environ. Sci.* 2012, 5, 9107-9120.

# MIL-47 pore landscape

The structural information for MIL-47 was taken from

L. Alaerts, C.E.A. Kirschhock, M. Maes, M. van der Veen, V. Finsy, A. Depla, J.A. Martens, G.V. Baron, P.A. Jacobs, J.F.M. Denayer, D. De Vos, Selective Adsorption and Separation of Xylene Isomers and Ethylbenzene with the Microporous Vanadium(IV) Terephthalate MIL-47, *Angew. Chem. Int. Ed.* 46 (2007) 4293-4297.

V. Finsy, H. Verelst, L. Alaerts, D. De Vos, P.A. Jacobs, G.V. Baron, J.F.M. Denayer, Pore-Filling-Dependent Selectivity Effects in the Vapor-Phase Separation of Xylene Isomers on the Metal-Organic Framework MIL-47, *J. Am. Chem. Soc.* 130 (2008) 7110-7118.

K. Barthelet, J. Marrot, D. Riou, G. Férey, A Breathing Hybrid Organic - Inorganic Solid with Very Large Pores and High Magnetic Characteristics, *Angew. Chem. Int. Ed.* 41 (2007) 281-284.

Snapshot of CO<sub>2</sub>/CH<sub>4</sub> mixture

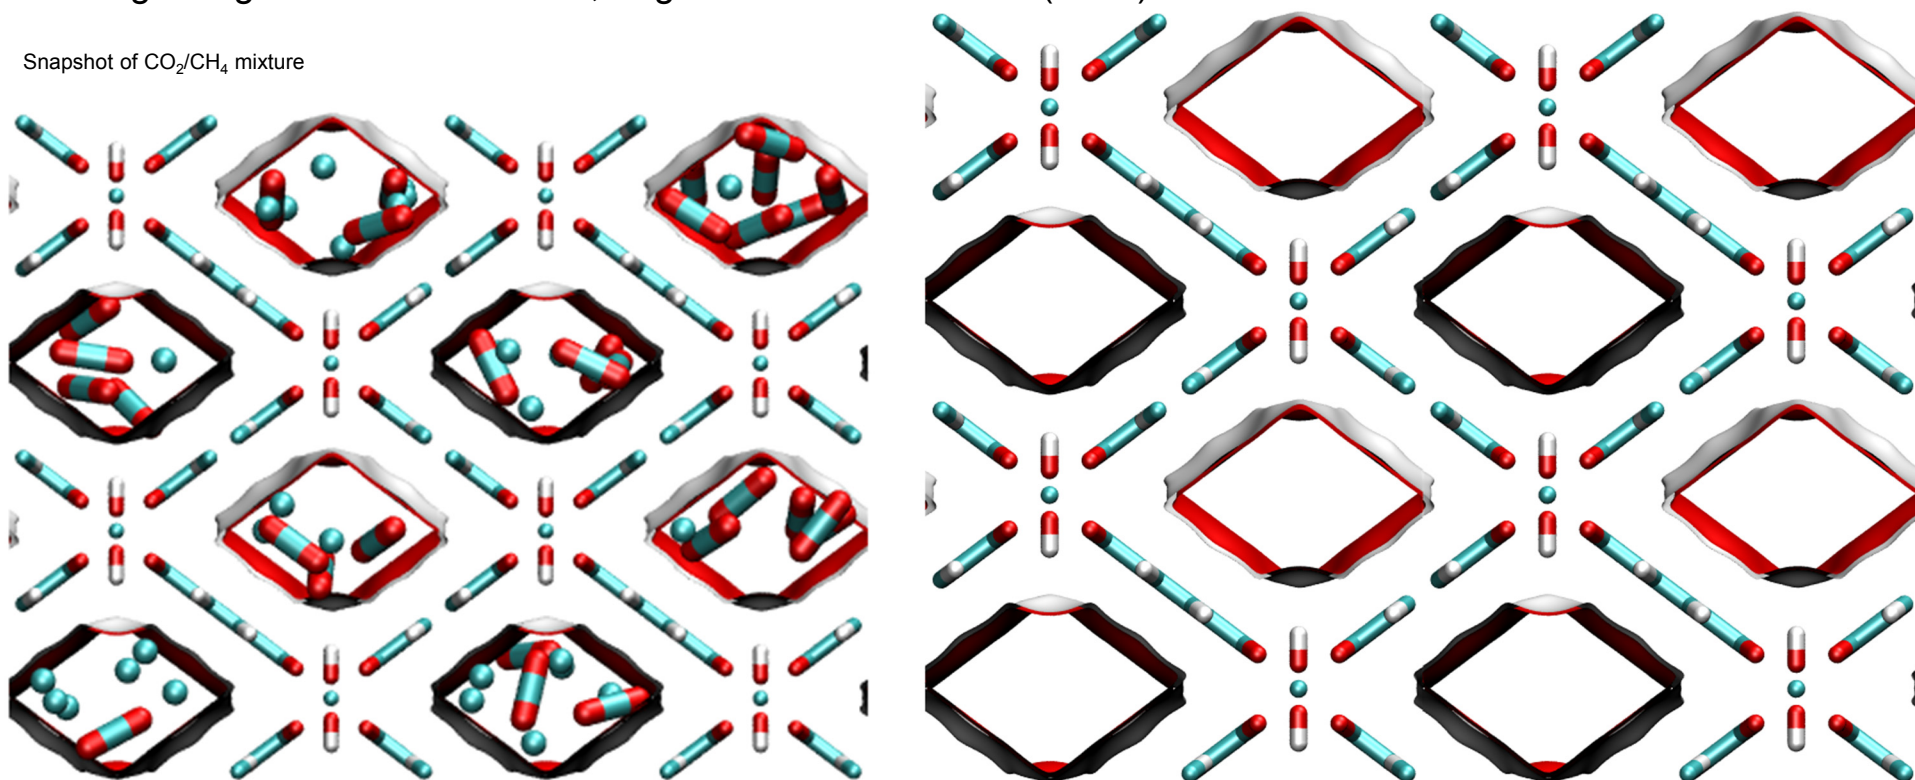

# MIL-47 dimensions

|                                                            | MIL-47   |
|------------------------------------------------------------|----------|
| $a / \text{\AA}$                                           | 6.808    |
| $b / \text{\AA}$                                           | 16.12    |
| $c / \text{\AA}$                                           | 13.917   |
| Cell volume / $\text{\AA}^3$                               | 1527.321 |
| conversion factor for [molec/uc] to [mol per kg Framework] | 1.0824   |
| conversion factor for [molec/uc] to [kmol/m <sup>3</sup> ] | 1.7868   |
| $\rho$ [kg/m <sup>3</sup> ]                                | 1004.481 |
| MW unit cell [g/mol(framework)]                            | 923.881  |
| $\phi$ , fractional pore volume                            | 0.608    |
| open space / $\text{\AA}^3/\text{uc}$                      | 929.3    |
| Pore volume / cm <sup>3</sup> /g                           | 0.606    |
| Surface area /m <sup>2</sup> /g                            | 1472.8   |
| DeLaunay diameter / $\text{\AA}$                           | 8.03     |

One-dimensional diamond-shaped channels with free internal diameter of 8 $\text{\AA}$

# MIL-47 CBMC simulations of isotherms, and isosteric heats of adsorption

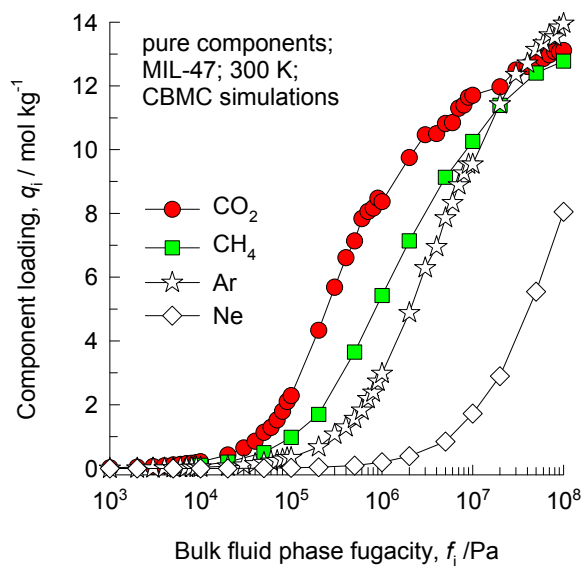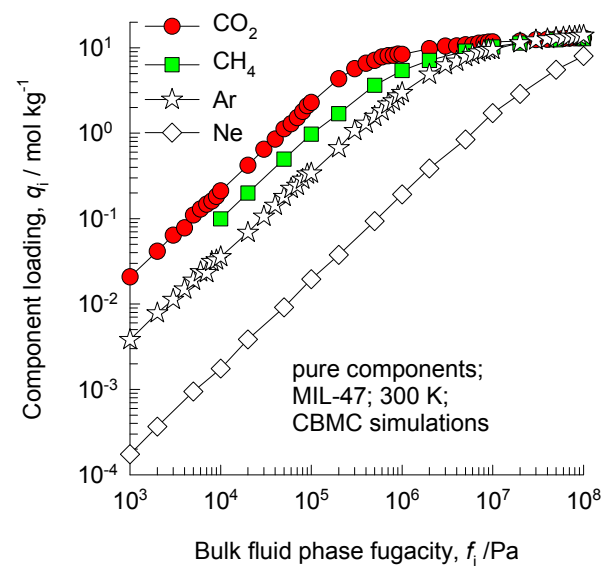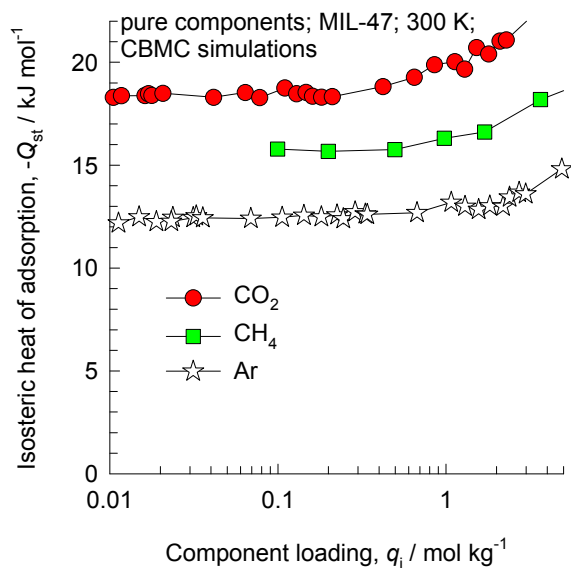

## Influence of Inverse Thermodynamic Factor on diffusivities

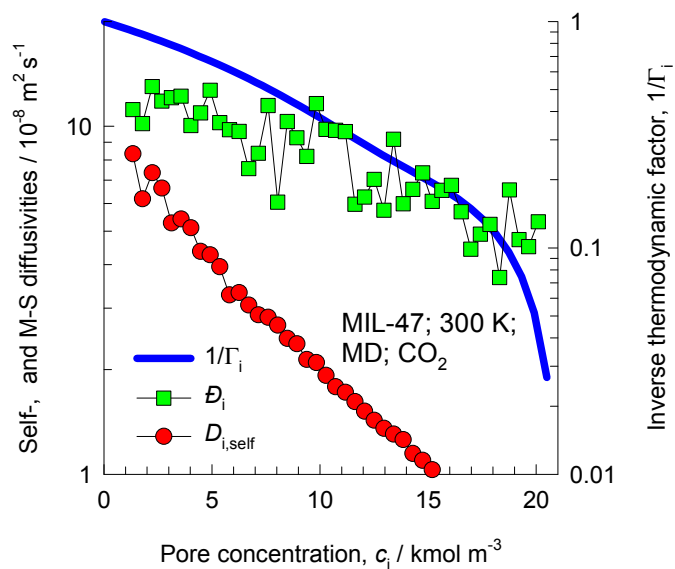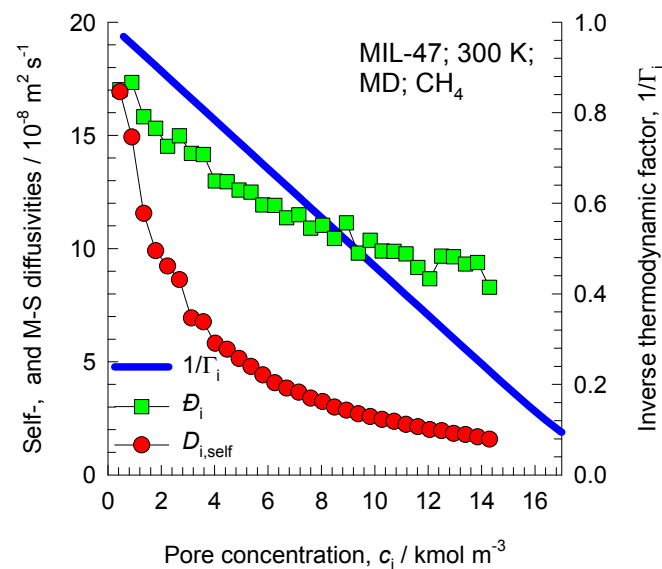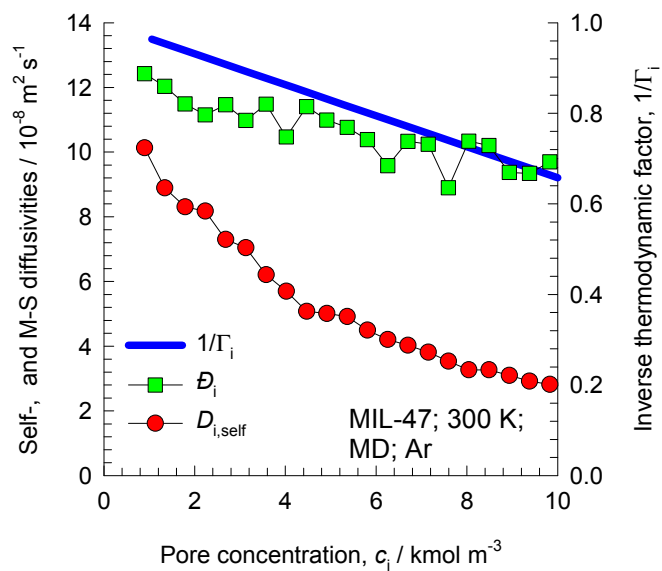

# Influence of Inverse Thermodynamic Factor on diffusivities

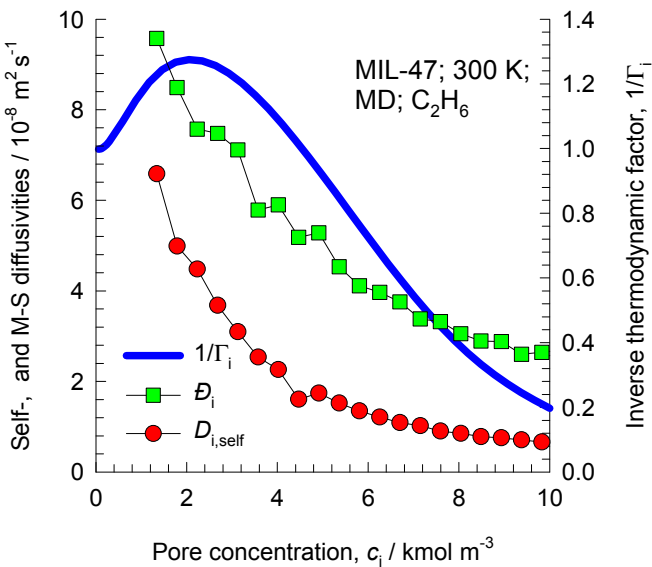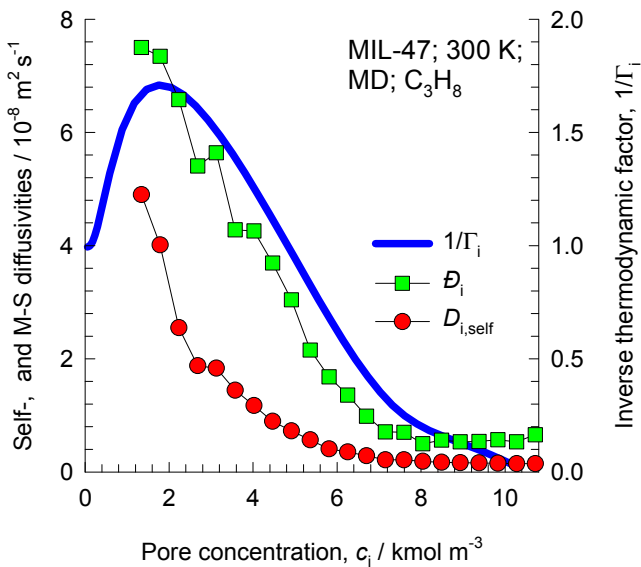

# MIL-47 CO<sub>2</sub> adsorption and diffusion

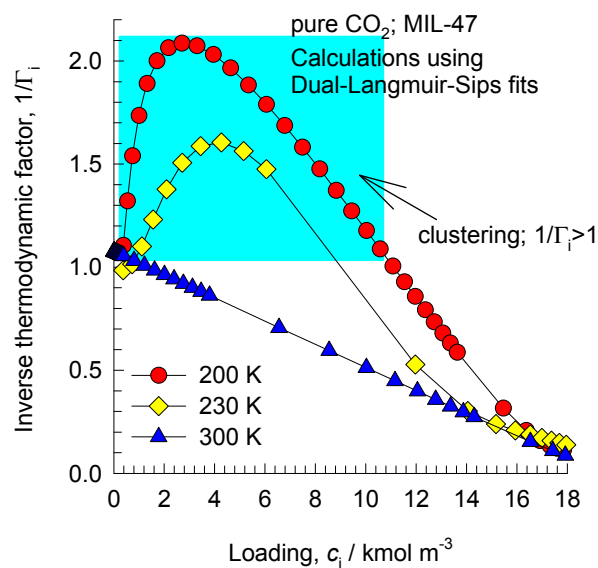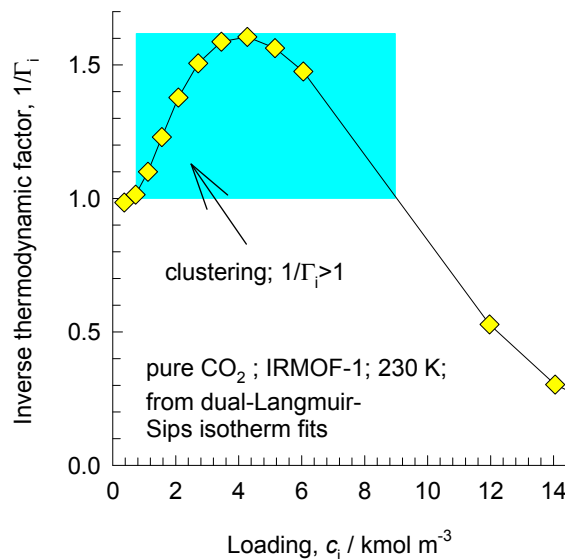

The RDFs show that the degree of clustering increases as the temperature is decreased.

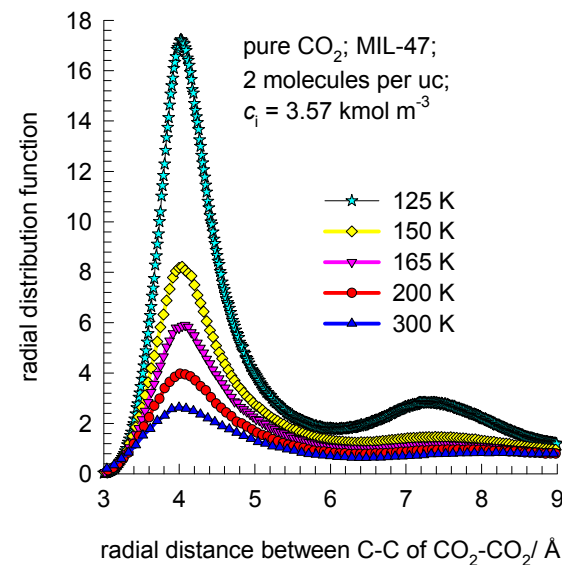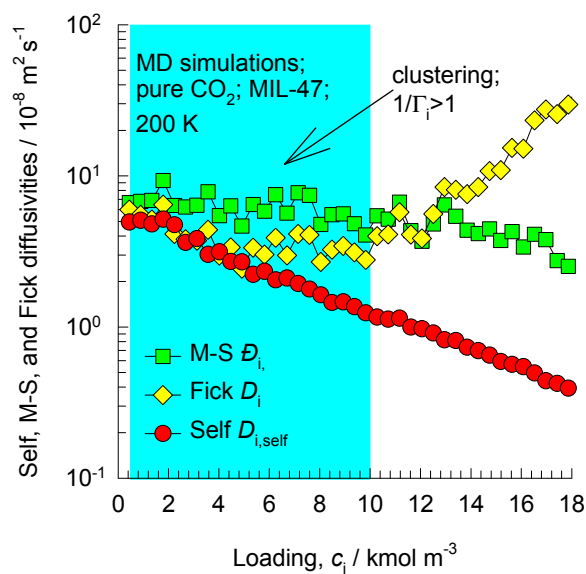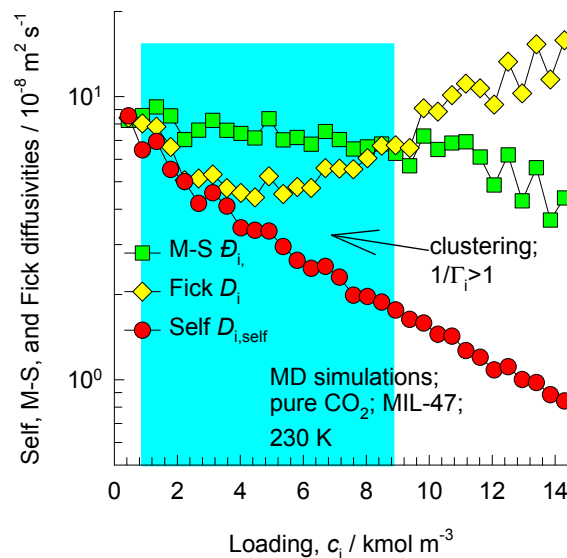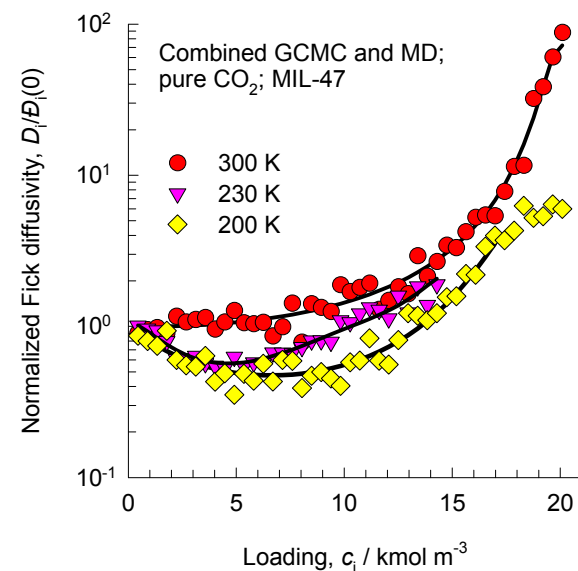

# MIL-47 CO<sub>2</sub> adsorption and diffusion; analysis of Salles et al. expt data

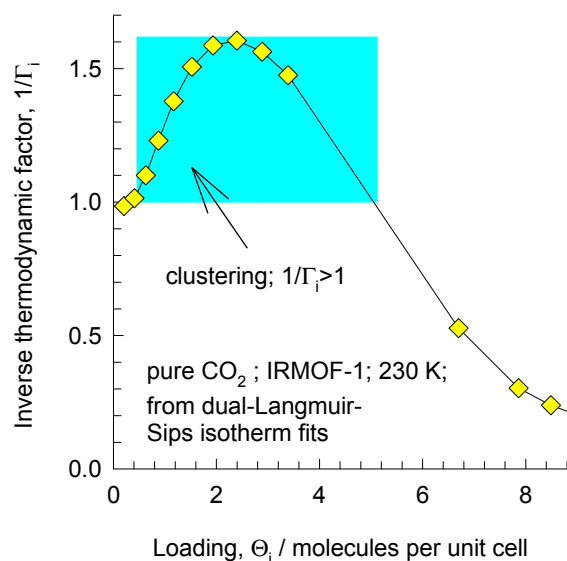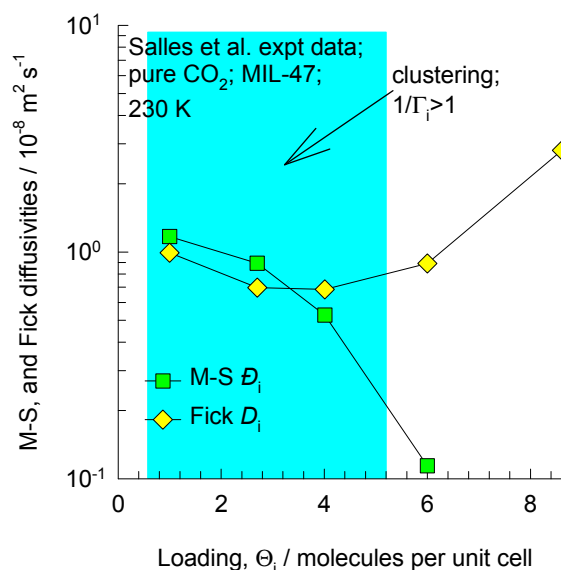

These are our CBMC simulation results, not those of Salles et al.

The experimental results of F. Salles, H. Jobic, T. Devic, P.L. Llewellyn, C. Serre, G. Férey, G. Maurin, Self and Transport Diffusivity of CO<sub>2</sub> in the Metal-Organic Framework MIL-47(V) Explored by Quasi-elastic Neutron Scattering Experiments and Molecular Dynamics Simulations, ACS Nano 2010, 4, 143-152, show that the Fick diffusivity can be lower than the Maxwell-Stefan diffusivity in regions where clustering of molecules occurs. The Fick diffusivity decreases with loading in the regions in which  $1/\Gamma_i > 1$ . Please also note that the Salles data on diffusivities is spatially averaged over x, y, and z directions. Our MD data in the previous slide is for diffusion in the x-direction. So our diffusivities are expected to be about 3 times higher.

# MIL-47 CH<sub>4</sub> adsorption and diffusion

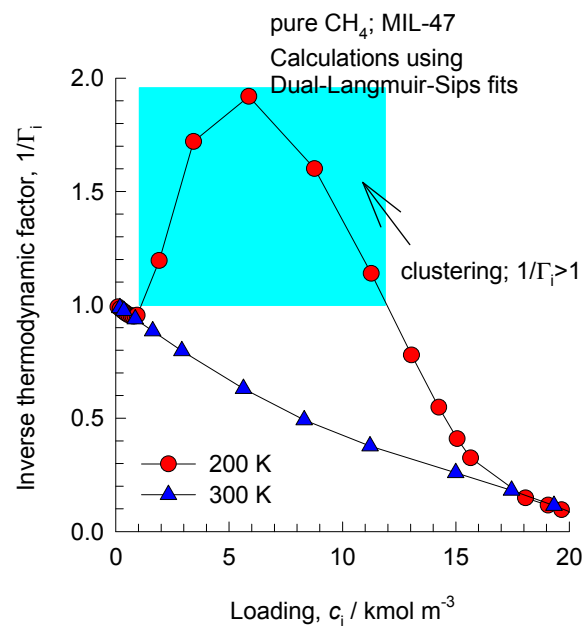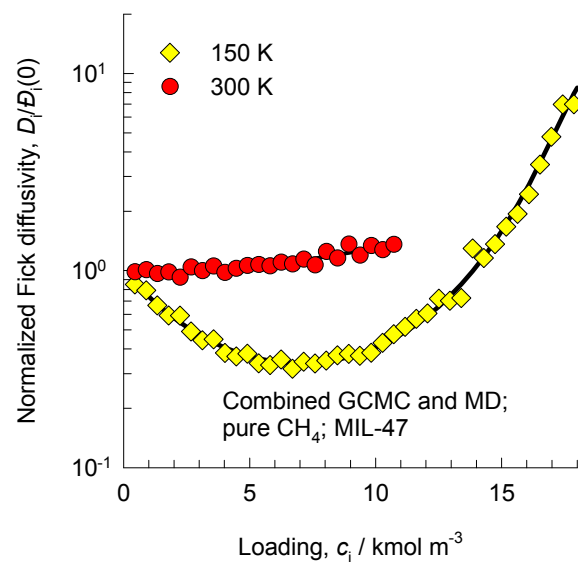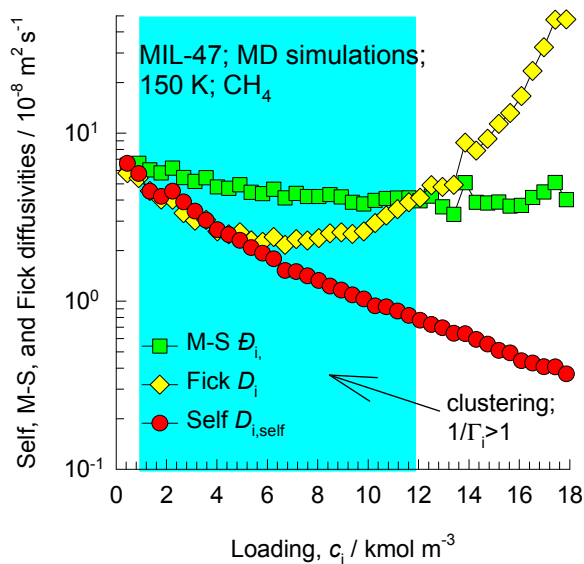

# MIL-47 Ar adsorption and diffusion

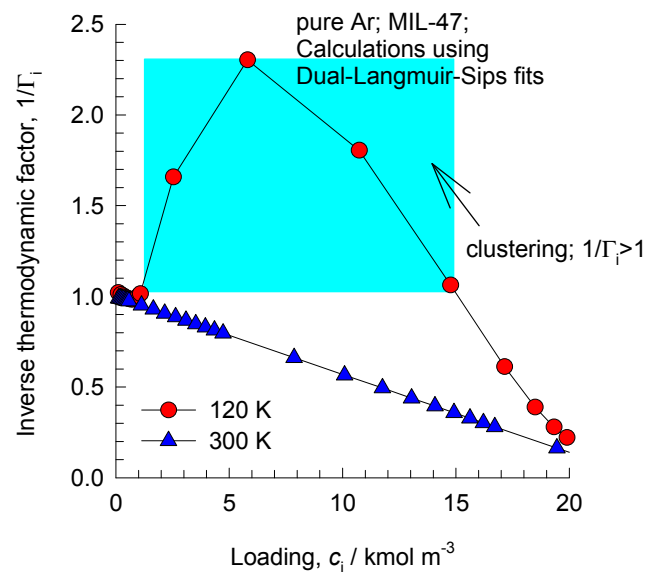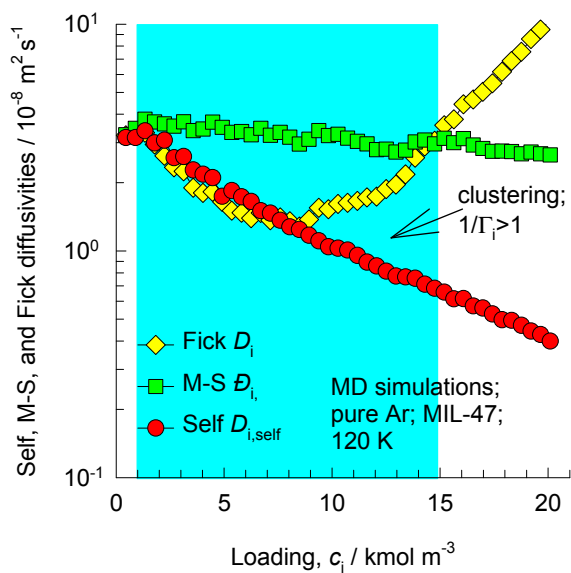

# MIL-47 CBMC simulation results for CO<sub>2</sub>-CH<sub>4</sub> mixtures

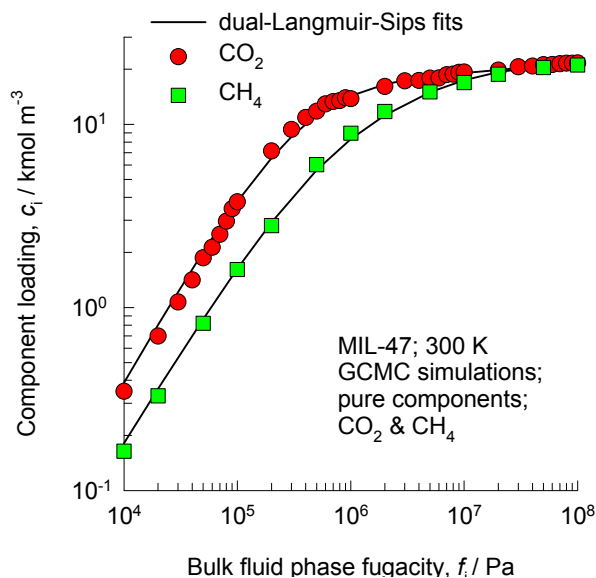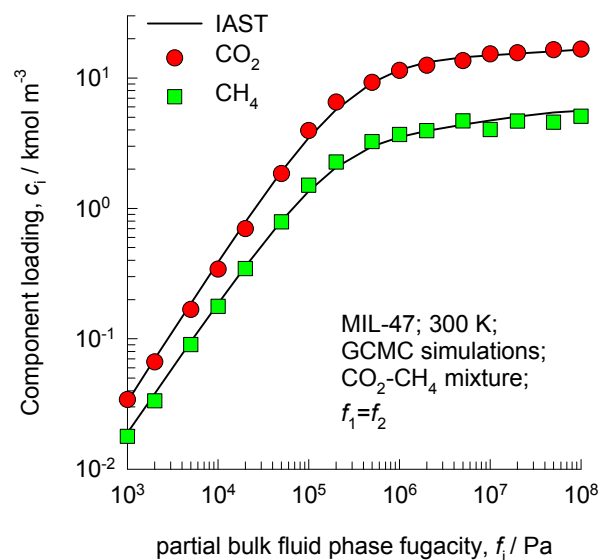

The IAST provides a good estimation of component loadings in the mixture.

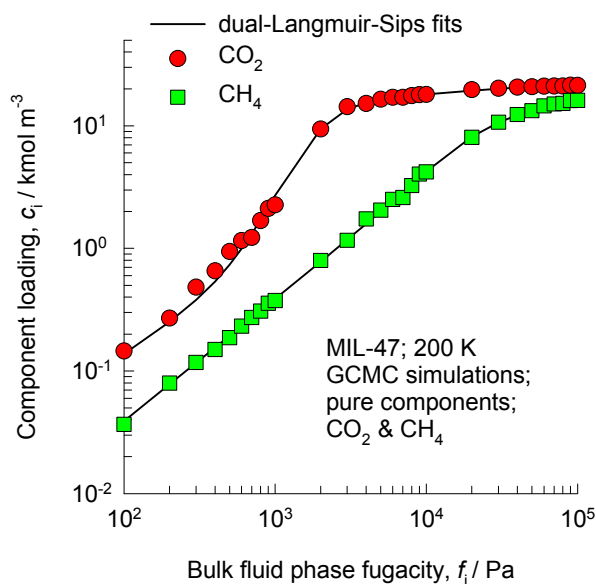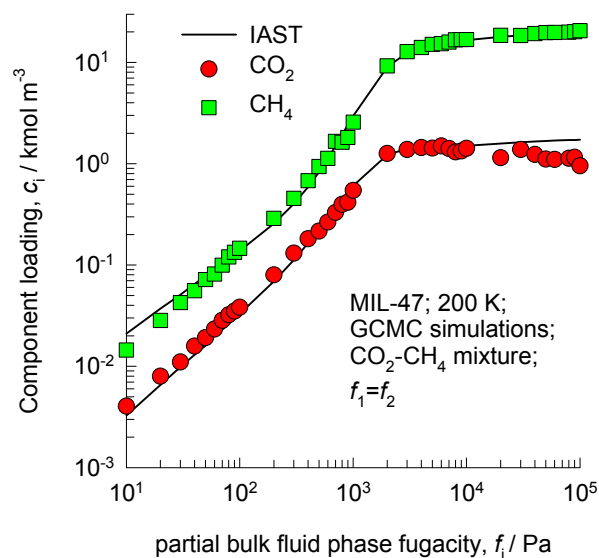

# MIL-47 RDFs for CO<sub>2</sub>-CH<sub>4</sub> mixtures

The RDFs are based on distances between the centres of mass of the molecules.

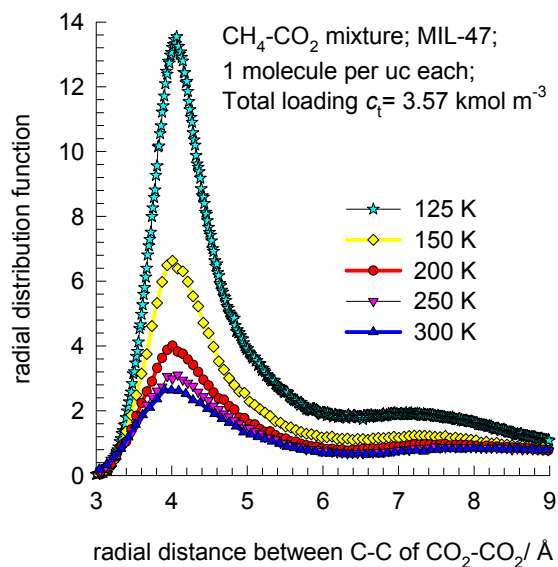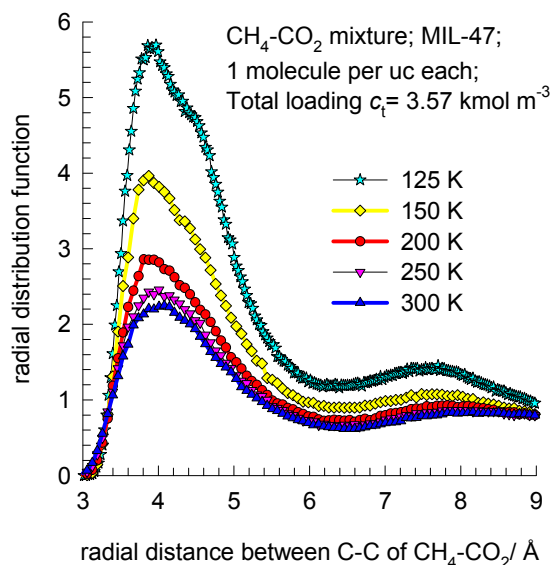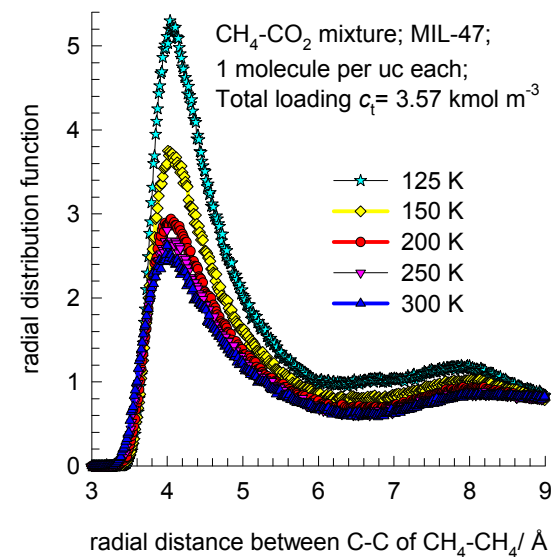

The RDFs demonstrate that clustering persists in mixtures, and increases with decreasing temperature

# MIL-47 adsorption of xylene isomers

These simulation results are from Castillo, J. M.; Vlugt, T. J. H.; Calero, S. J. Phys. Chem. C 2009, 113, 20869-20874.

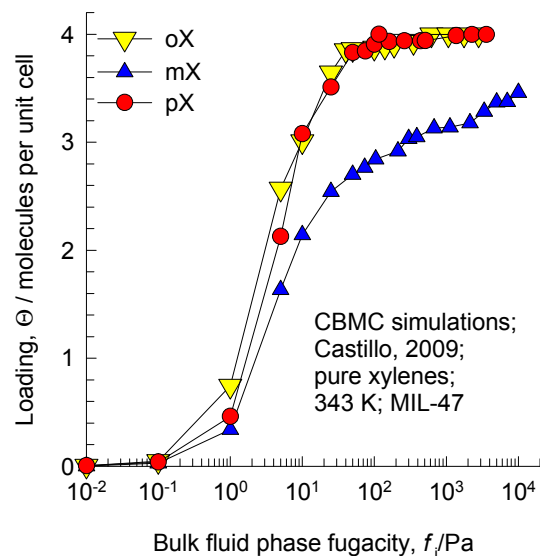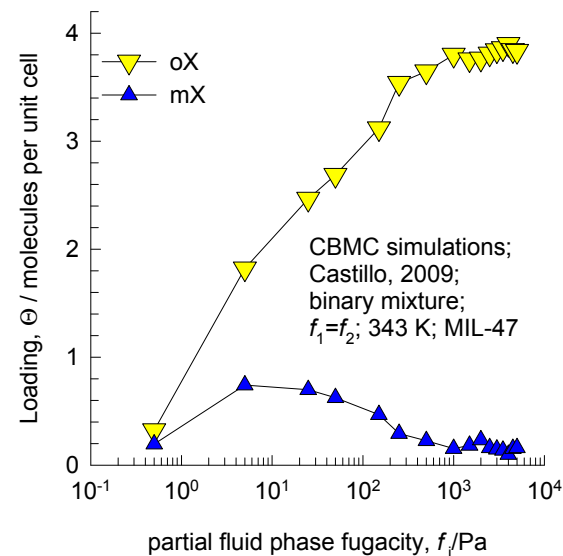

The adsorption selectivity hierarchy  $oX > mX$  is dictated by the hierarchy of critical temperatures, i.e. degree of clustering. The degree of clustering has to be interpreted somewhat differently. As can be seen in the snapshots of the location of o-, p-, and m- xylenes in the following three slides, the xylene isomers stack nicely within the channels of MIL-47. The stacking efficiency for o- and p- isomers are significantly superior to that of the m- isomer, as evidenced from the snapshots.

# p-xylene

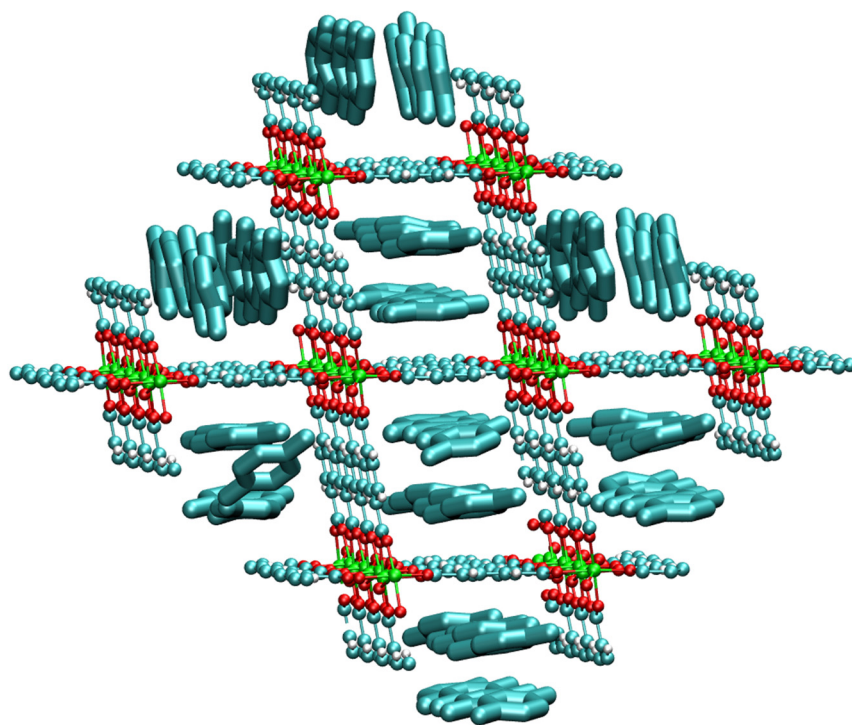

o-xylene and p-xylene  
appear to pack the  
channels very well

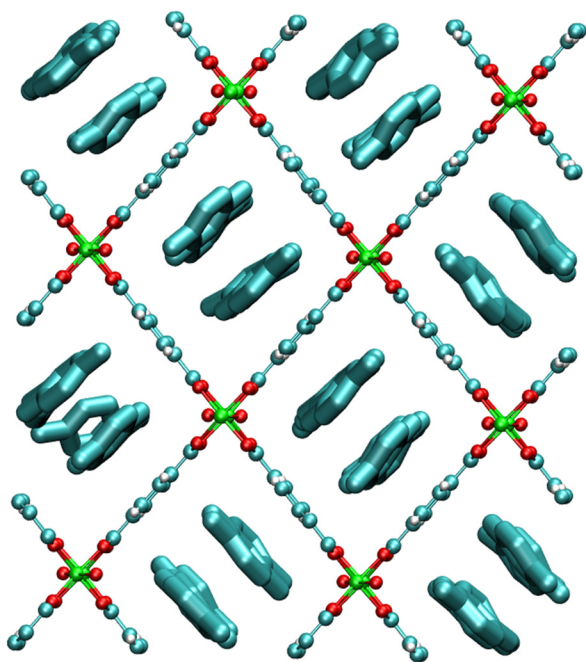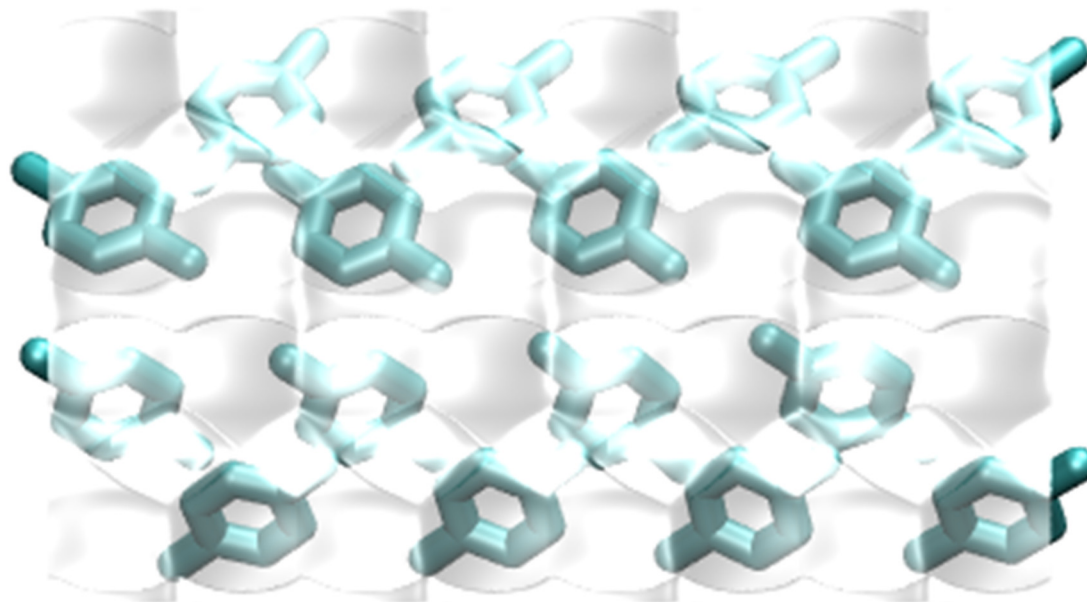

# o-xylene

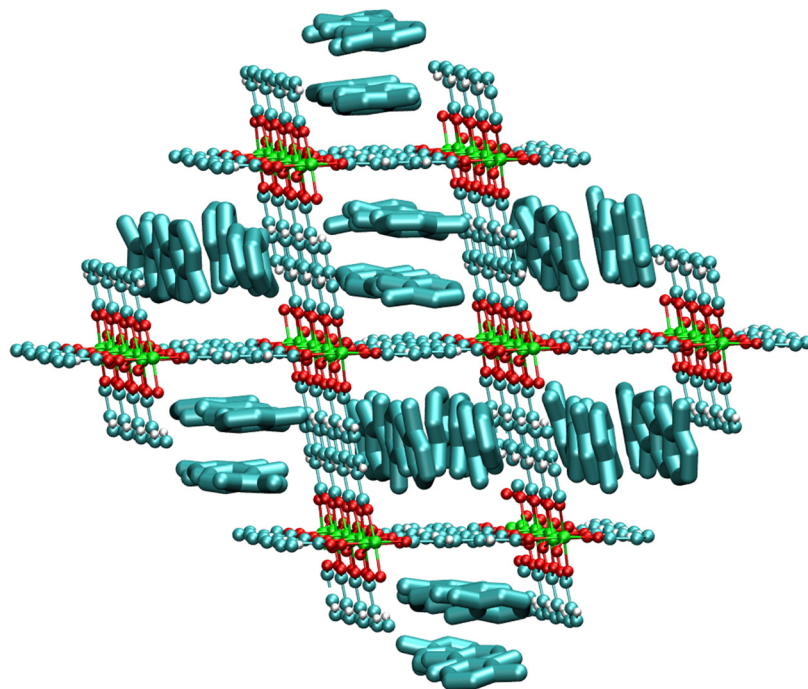

o-xylene and p-xylene  
appear to pack the  
channels very well

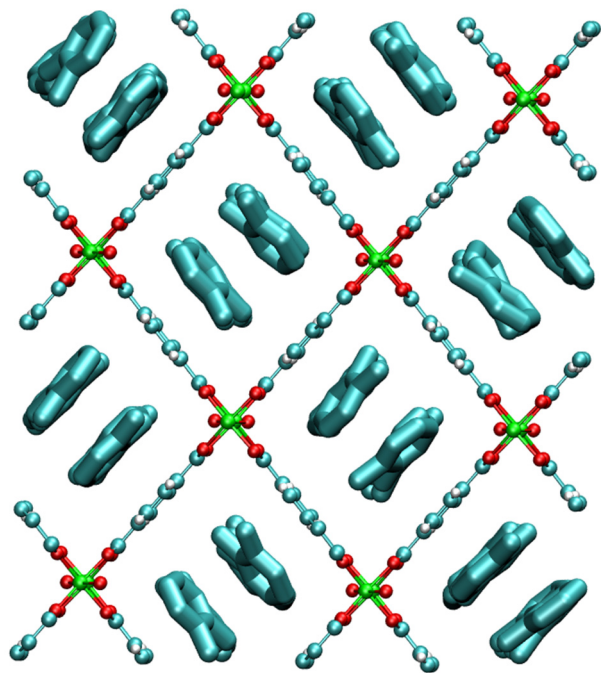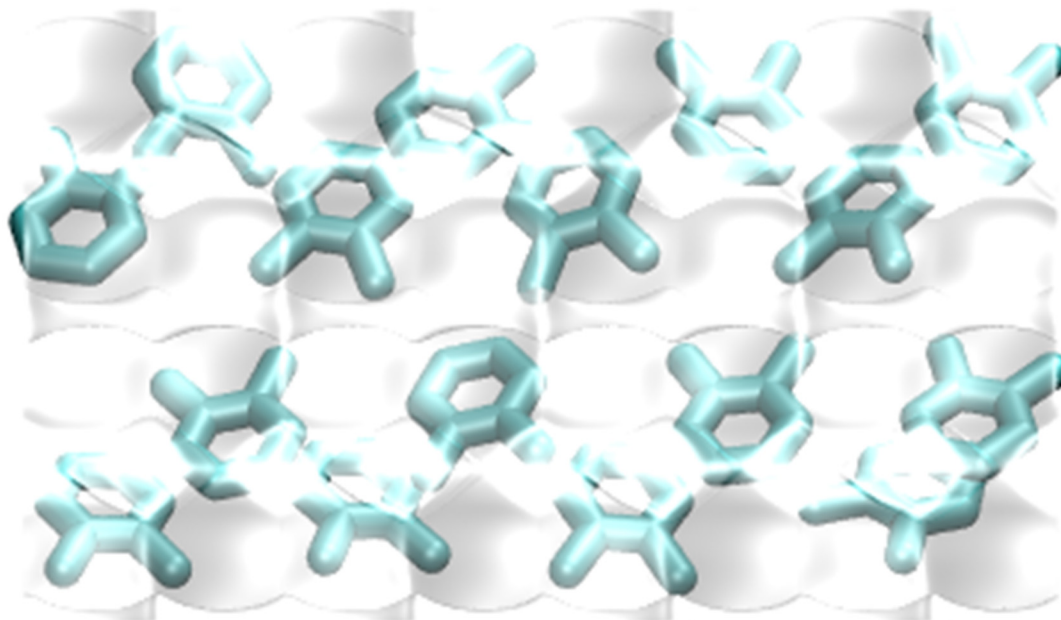

# m-xylene

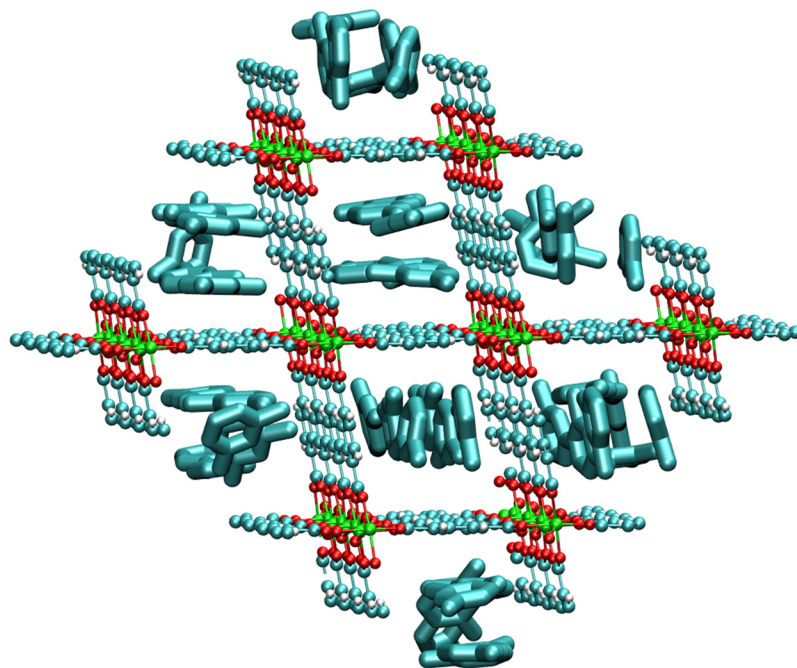

m-xylene does not pack the channels as well as o- and p-xylene. This is also evidenced in the snapshots.

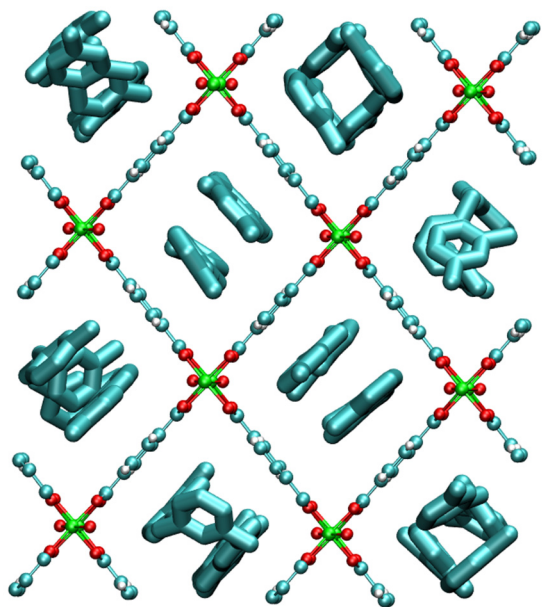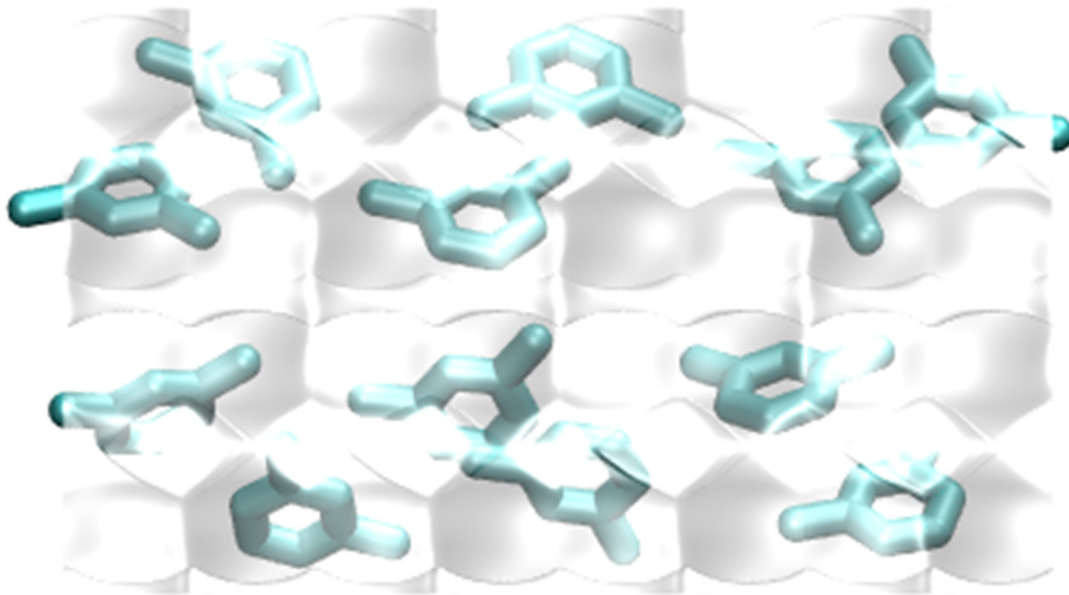

# MIL – 53 (Cr) pore landscape

The structural data for MIL-53 (Cr) =  $\text{Cr}(\text{OH})(\text{O}_2\text{C}-\text{C}_6\text{H}_4-\text{CO}_2)$  was taken from

D.S. Coombes, F. Corà, C. Mellot-Draznieks, R.G. Bell, Sorption-Induced Breathing in the Flexible Metal Organic Framework CrMIL-53: Force-Field Simulations and Electronic Structure Analysis, *J. Phys. Chem. C* 113 (2009) 544-552.

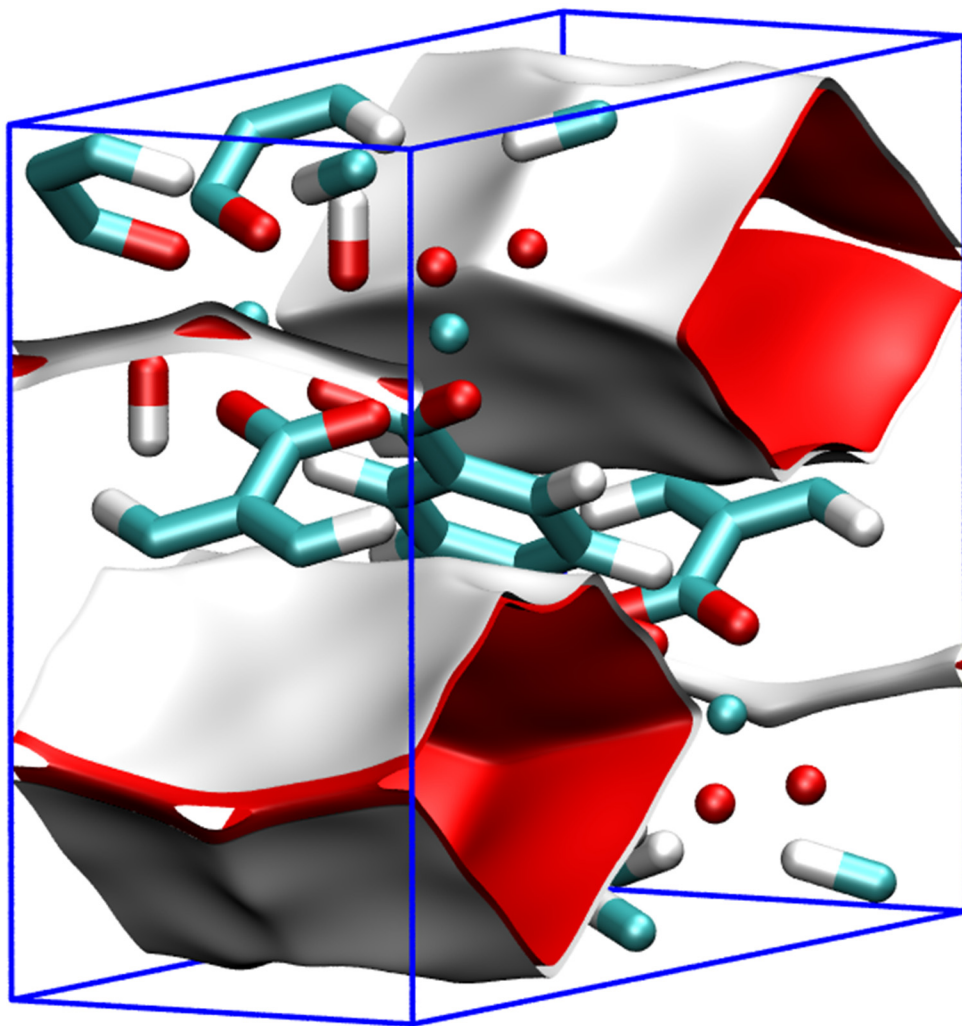

Simulation results presented are for –lp structure, i.e. large pore

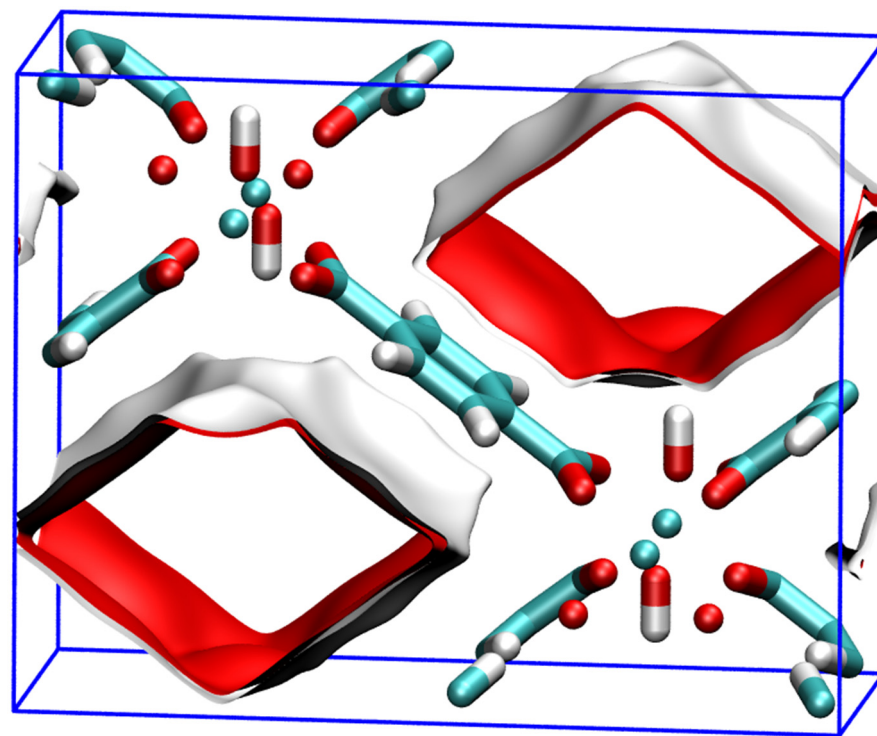

# MIL–53 (Cr) pore dimensions

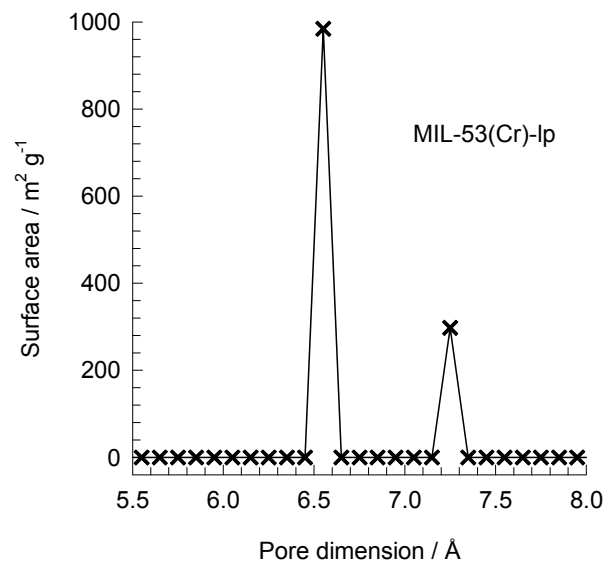

This plot of surface area versus pore dimension is determined using a combination of the DeLaunay triangulation method for pore dimension determination, and the procedure of Düren for determination of the surface area.

|                                                            |              |
|------------------------------------------------------------|--------------|
|                                                            | MIL53(Cr)-lp |
| <i>a</i> / Å                                               | 16.733       |
| <i>b</i> / Å                                               | 13.038       |
| <i>c</i> / Å                                               | 6.812        |
| Cell volume / Å³                                           | 1486.139     |
| conversion factor for [molec/uc] to [mol per kg Framework] | 1.0728       |
| conversion factor for [molec/uc] to [kmol/m³]              | 2.0716       |
| $\rho$ [kg/m3]                                             | 1041.534     |
| MW unit cell [g/mol(framework)]                            | 932.1312     |
| $\phi$ , fractional pore volume                            | 0.539        |
| open space / Å³/uc                                         | 801.6        |
| Pore volume / cm³/g                                        | 0.518        |
| Surface area /m²/g                                         | 1280.5       |
| DeLaunay diameter /Å                                       | 7.40         |

One-dimensional lozenge-shaped channels

# Influence of Inverse Thermodynamic Factor on diffusivities

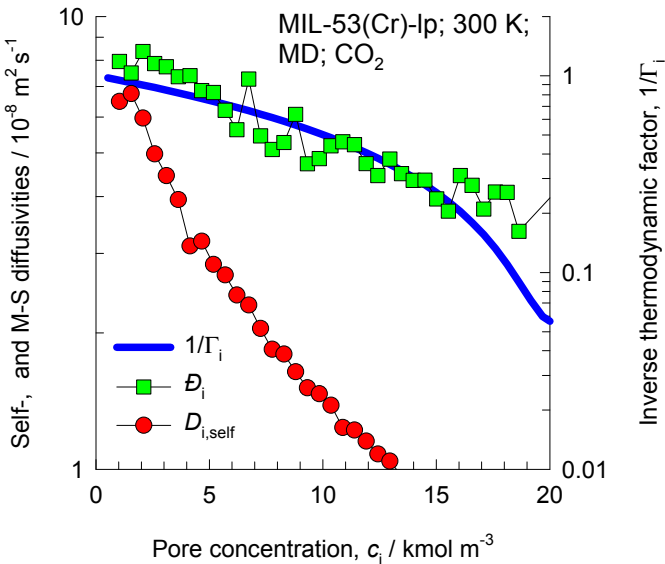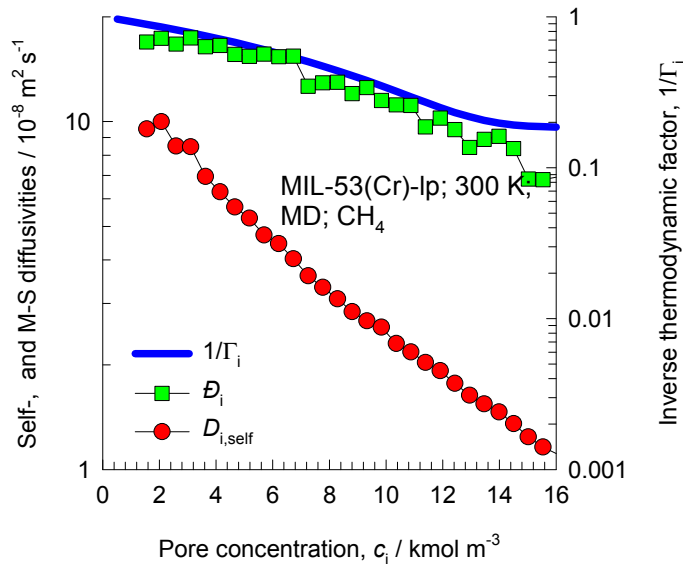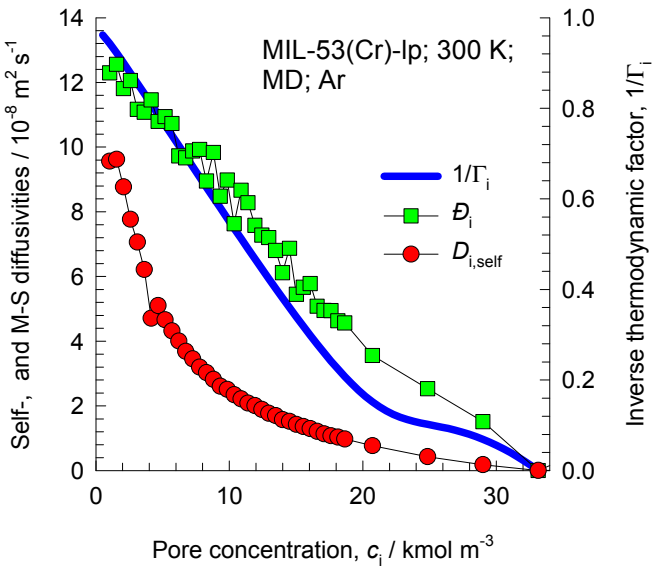

# MIL-53 (Cr) -lp

## CBMC simulation results for adsorption of pure CO<sub>2</sub>

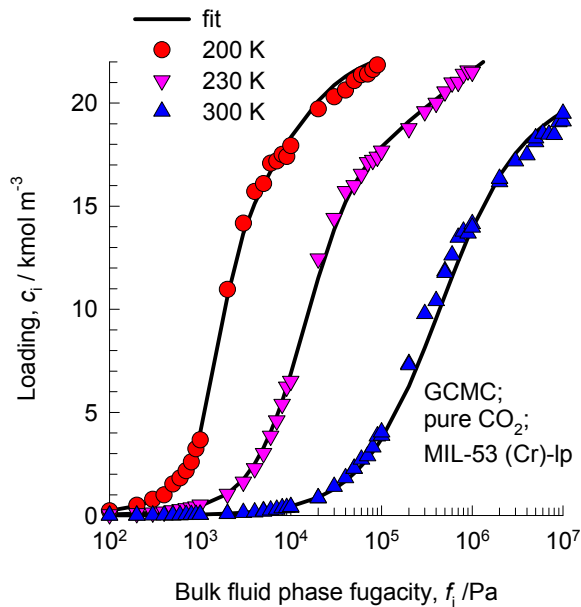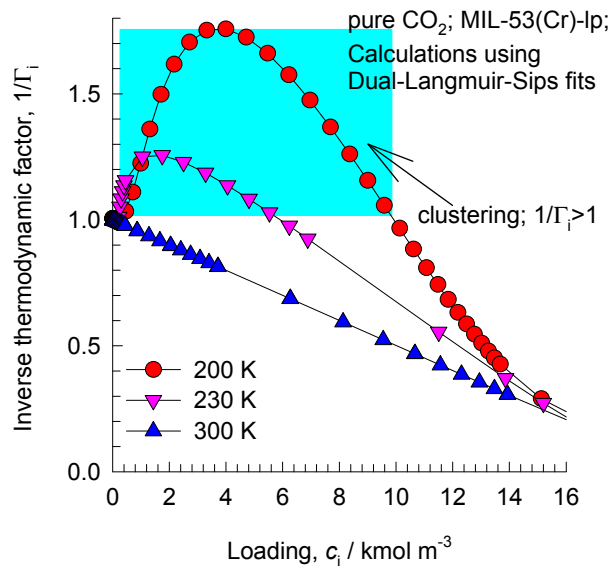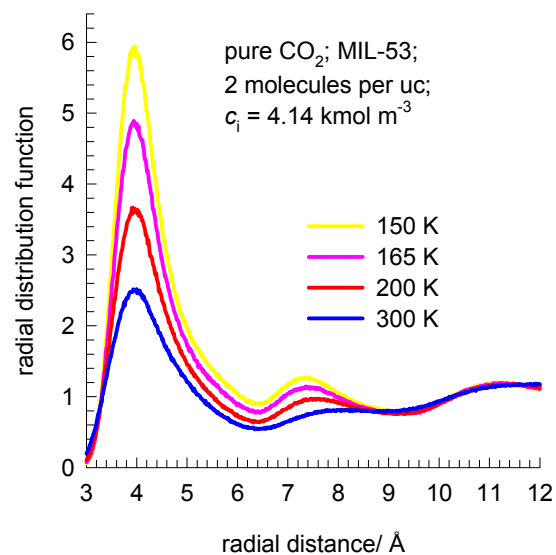

# MIL-53 (Cr)-Ip

## MD simulations for CO<sub>2</sub> and CH<sub>4</sub> diffusion at 300 K

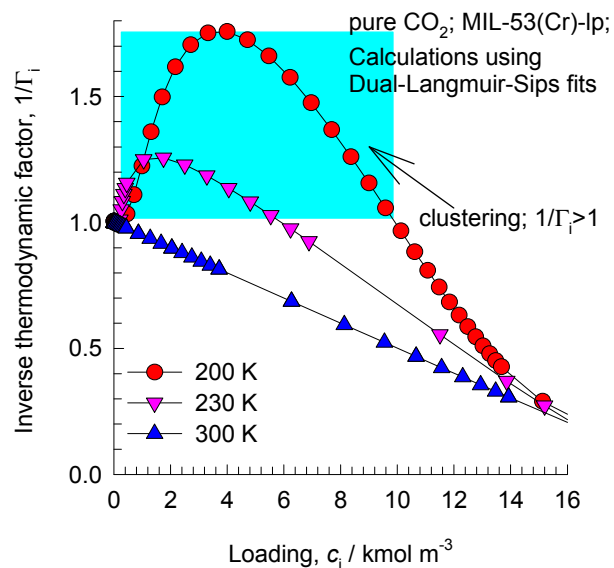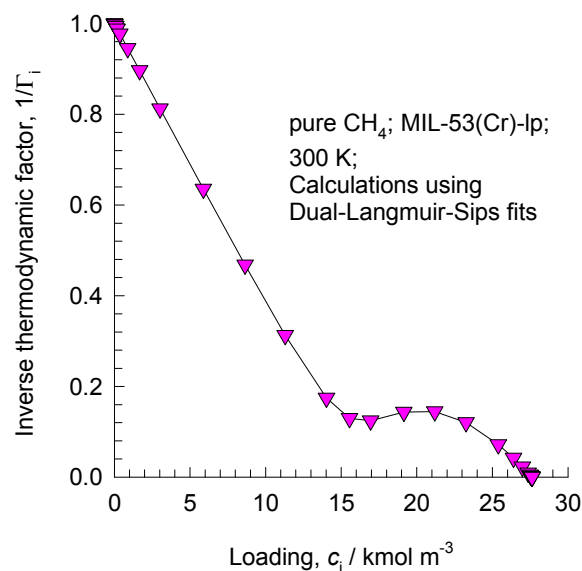

No clustering of either component at 300 K

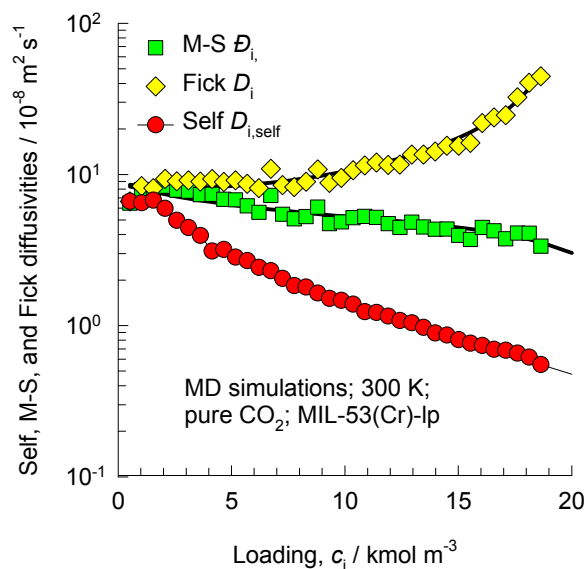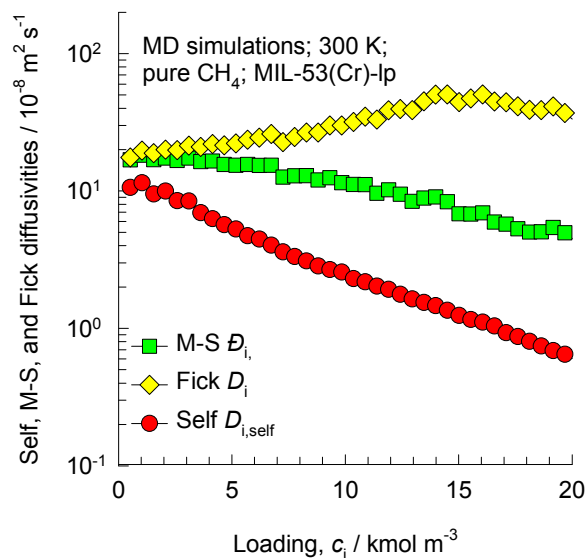

# MIL-53 (Cr)-lp

## MD simulations for CO<sub>2</sub> diffusion at 200 K and 230 K

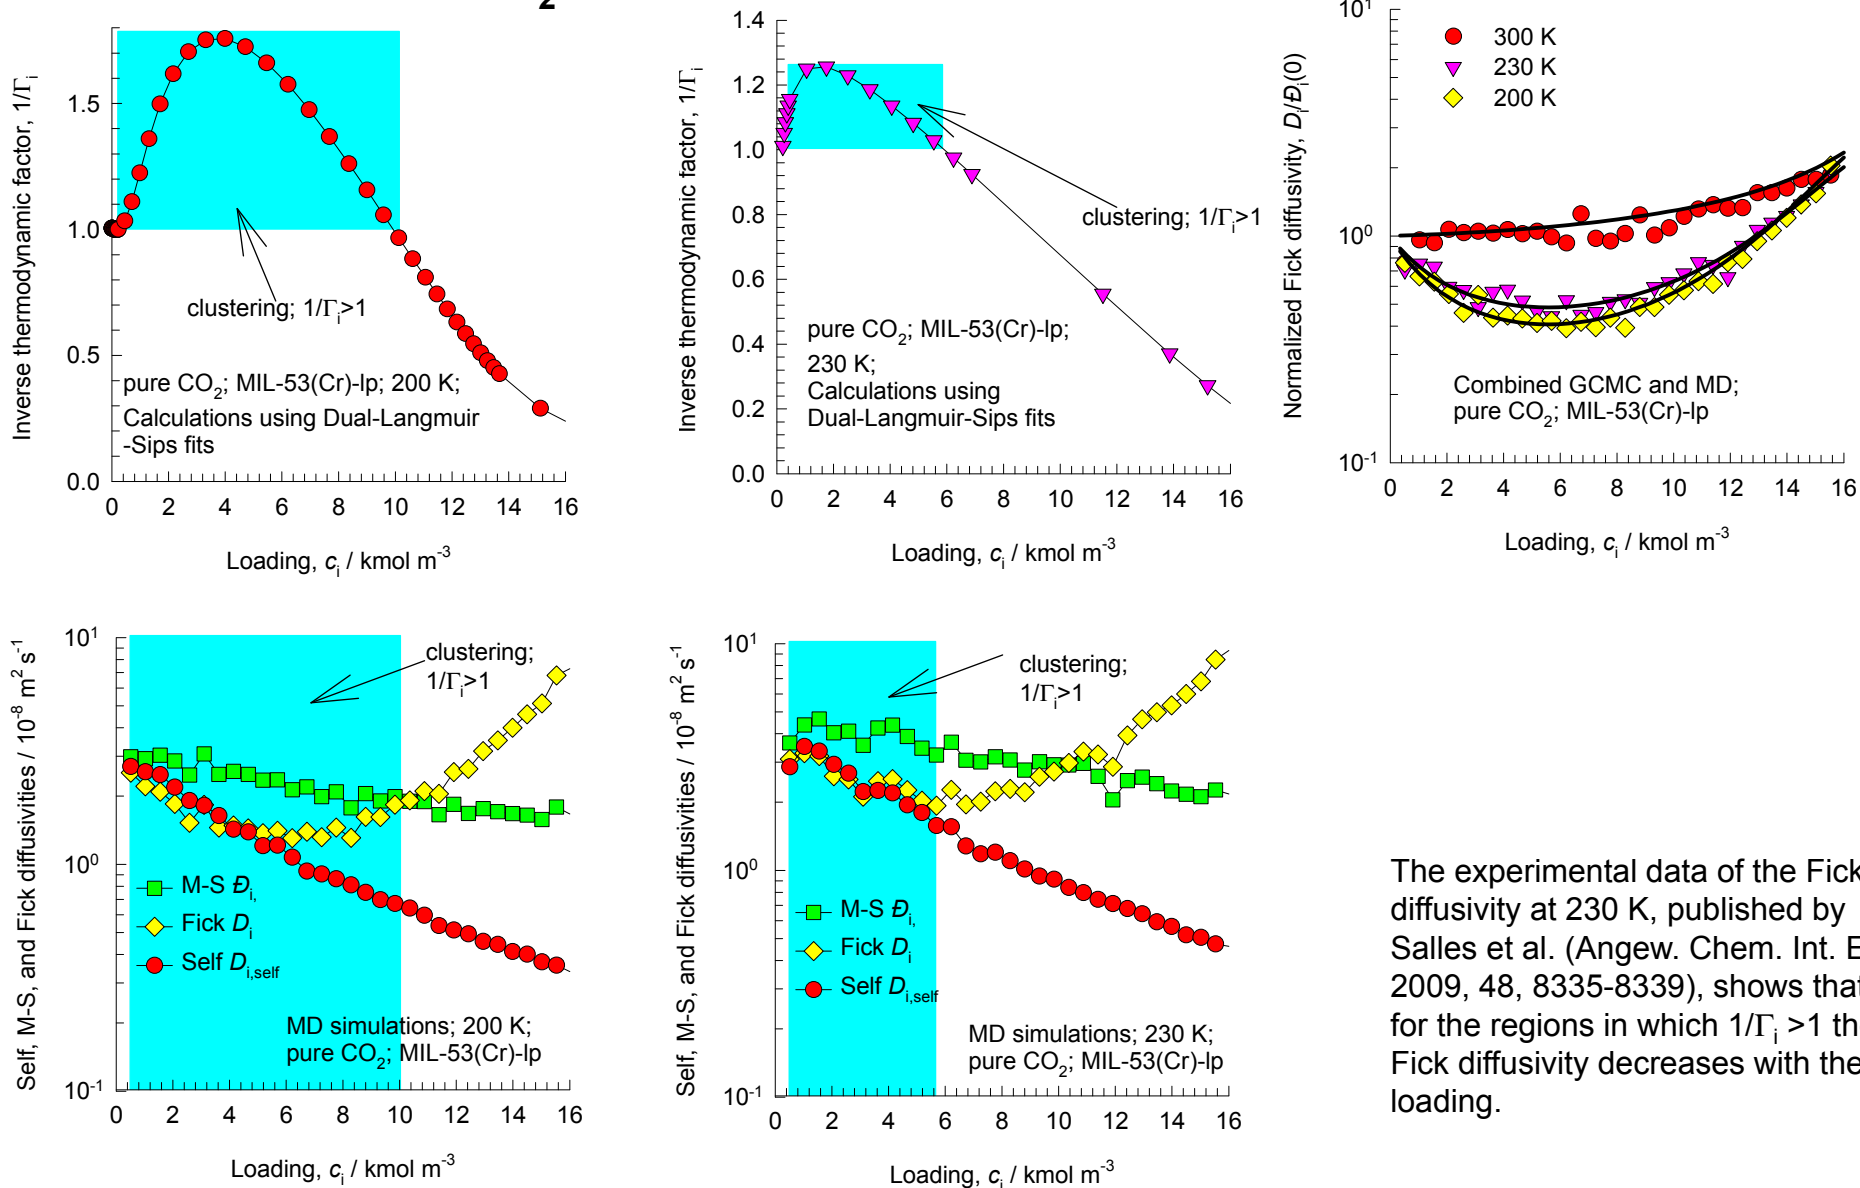

The experimental data of the Fick diffusivity at 230 K, published by Salles et al. (Angew. Chem. Int. Ed. 2009, 48, 8335-8339), shows that for the regions in which  $1/\Gamma_i > 1$  the Fick diffusivity decreases with the loading.

# **1D micro-porous channels With side pockets**

# MOR pore landscape

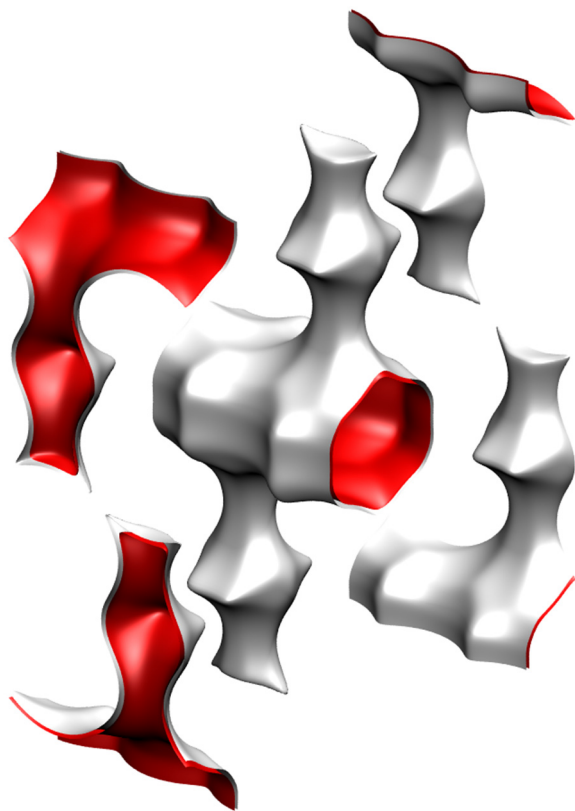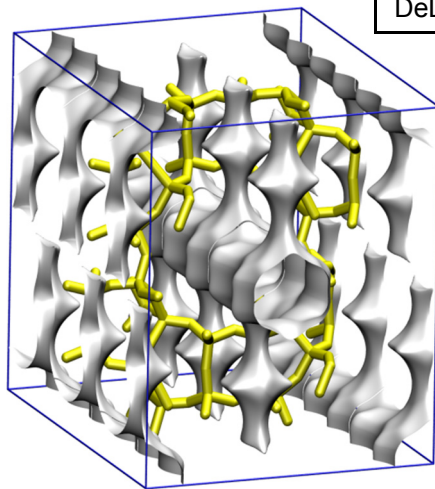

|                                                            | MOR      |
|------------------------------------------------------------|----------|
| $a / \text{\AA}$                                           | 18.094   |
| $b / \text{\AA}$                                           | 20.516   |
| $c / \text{\AA}$                                           | 7.524    |
| Cell volume / $\text{\AA}^3$                               | 2793.033 |
| conversion factor for [molec/uc] to [mol per kg Framework] | 0.3467   |
| conversion factor for [molec/uc] to [kmol/m <sup>3</sup> ] | 2.0877   |
| $\rho$ [kg/m <sup>3</sup> ]                                | 1714.691 |
| MW unit cell [g/mol(framework)]                            | 2884.07  |
| $\phi$ , fractional pore volume                            | 0.285    |
| open space / $\text{\AA}^3/\text{uc}$                      | 795.4    |
| Pore volume / cm <sup>3</sup> /g                           | 0.166    |
| Surface area / m <sup>2</sup> /g                           | 417.0    |
| DeLaunay diameter / $\text{\AA}$                           | 6.44     |

Structural information from: C. Baerlocher, L.B. McCusker, Database of Zeolite Structures, International Zeolite Association,  
<http://www.iza-structure.org/databases/>

# MOR pore dimensions

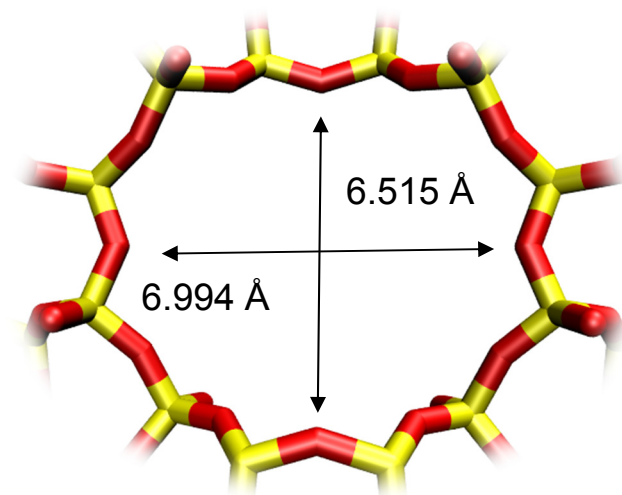

MOR Channel [1 0 0]

12-ring  
main channels

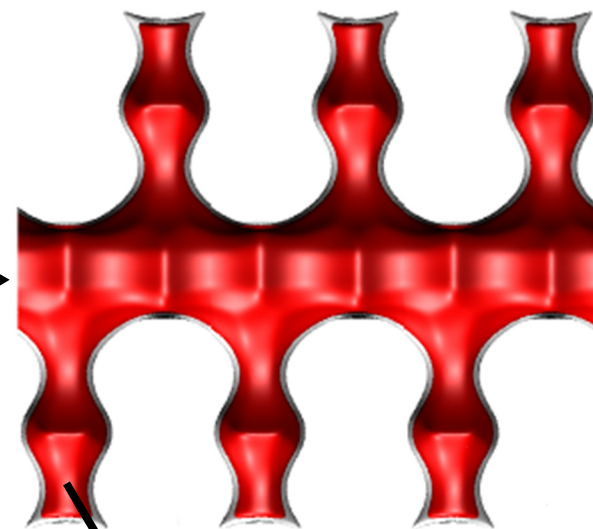

8-ring

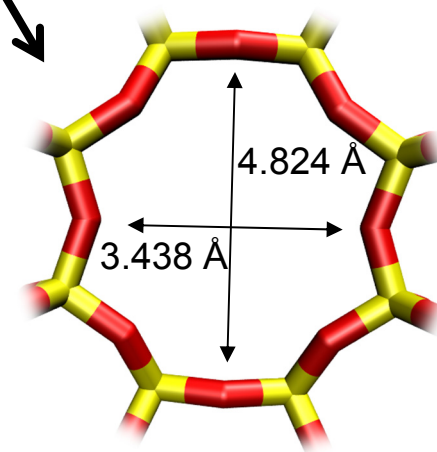

MOR [0 1 0]

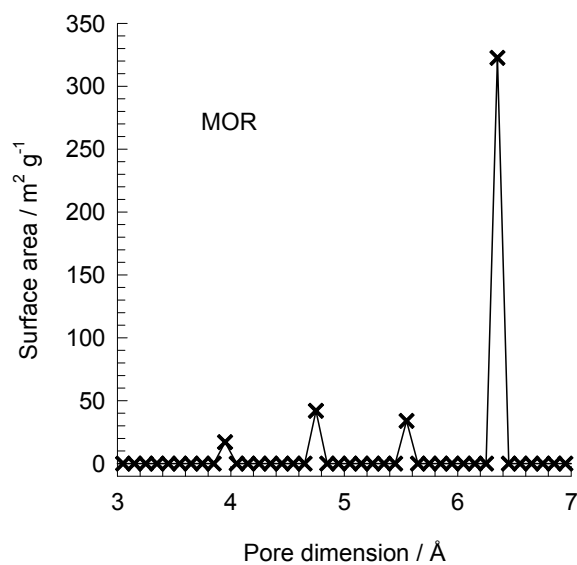

This plot of surface area versus pore dimension is determined using a combination of the DeLaunay triangulation method for pore dimension determination, and the procedure of Dören for determination of the surface area.

# MOR CBMC simulations of isotherms, and $-Q_{st}$ ; MD simulations of diffusivities

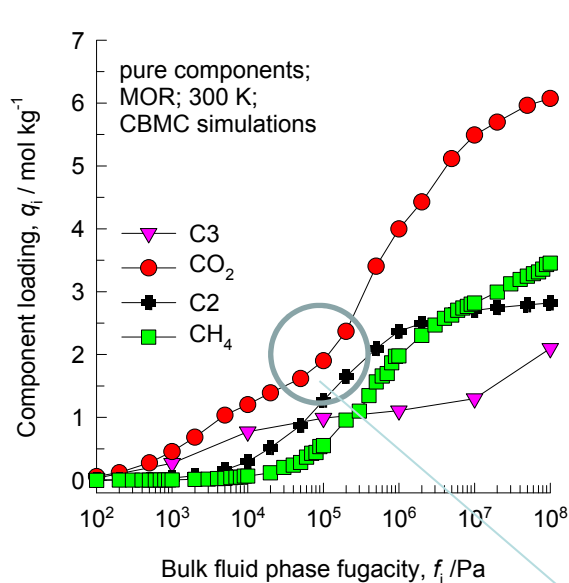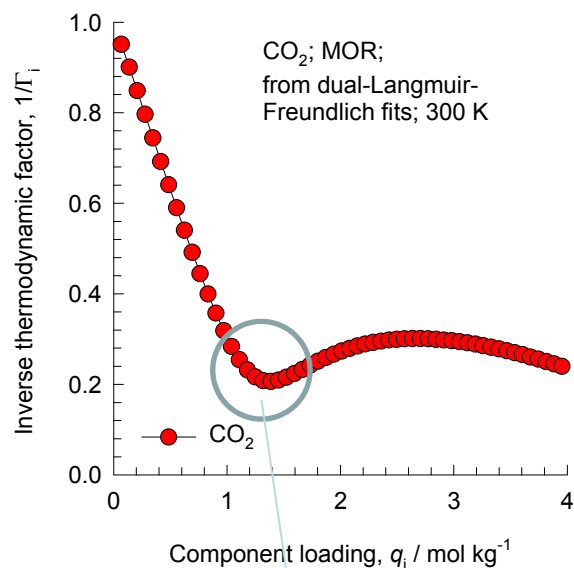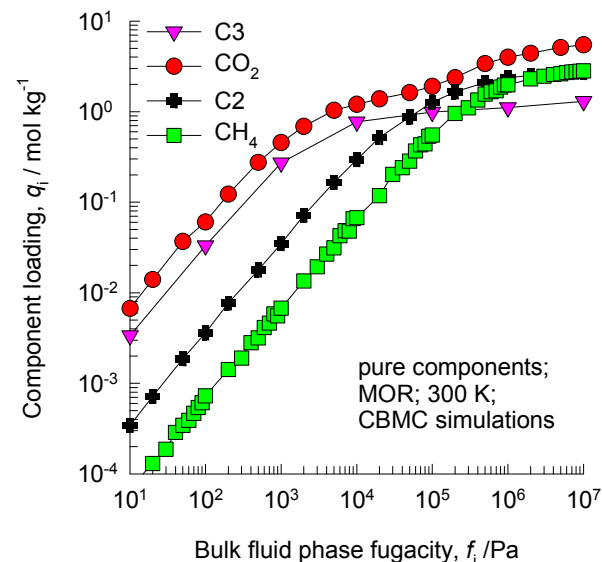

Note that C2 and C3 above refer to saturated alkanes.

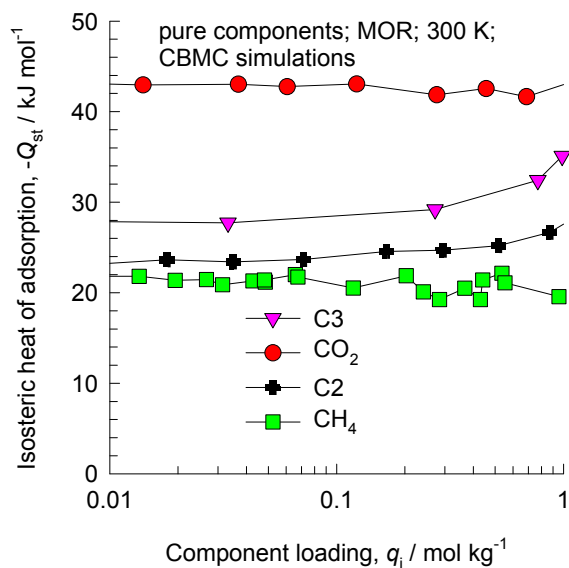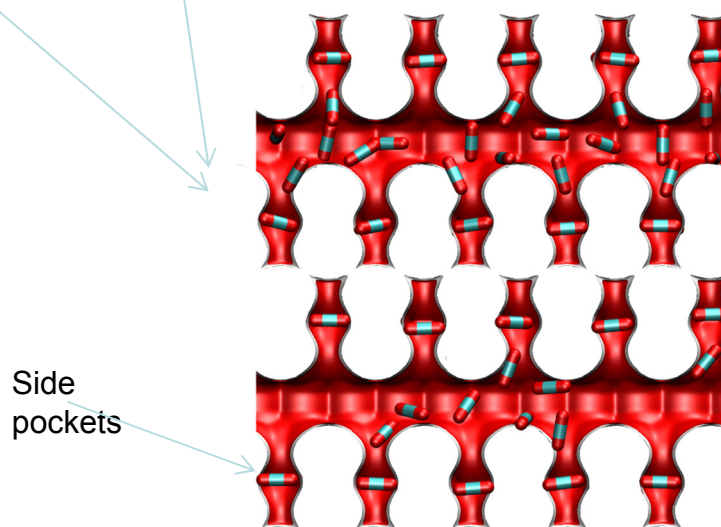

CO<sub>2</sub> preferentially locates in the side pockets as shown in snapshot. At a loading of  $4/uc = 1.39$  mol/kg, the pockets are full. This causes an infection. This also explains the high heat of adsorption due to snug fits in the side pockets

# MOR MD simulations of unary diffusivities

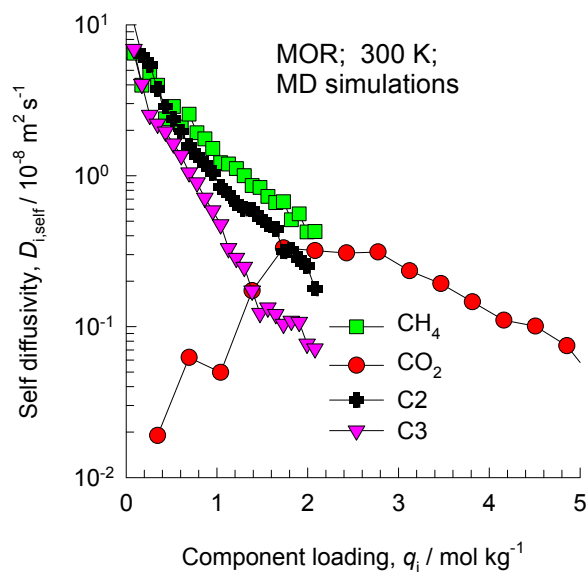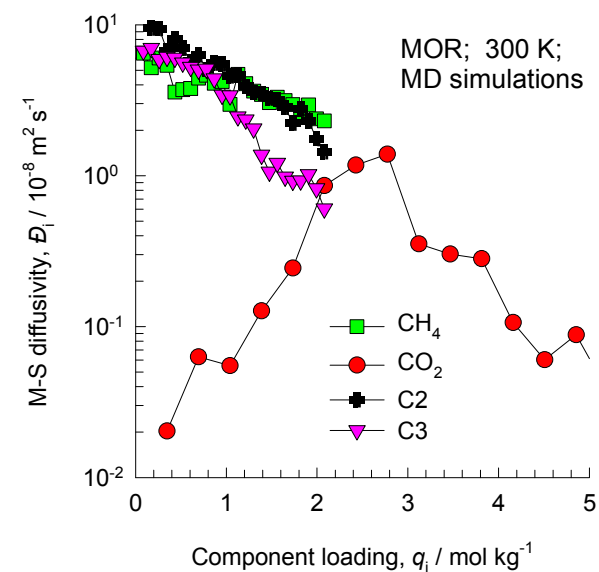

CO<sub>2</sub> preferentially locates in the side pockets in this loading range. This explains the low diffusivities.

Side pockets

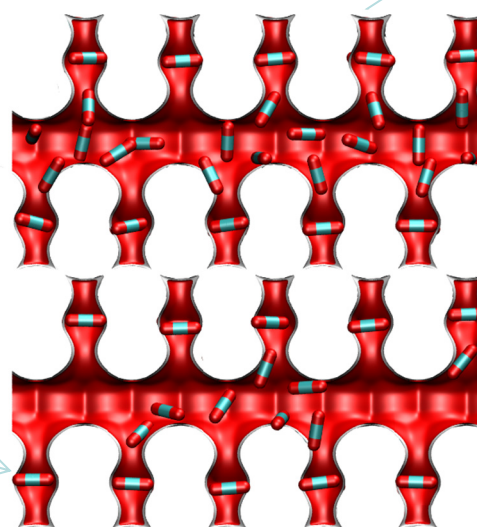

## Influence of $1/\Gamma_i$ and $-Q_{st}$ on diffusivities

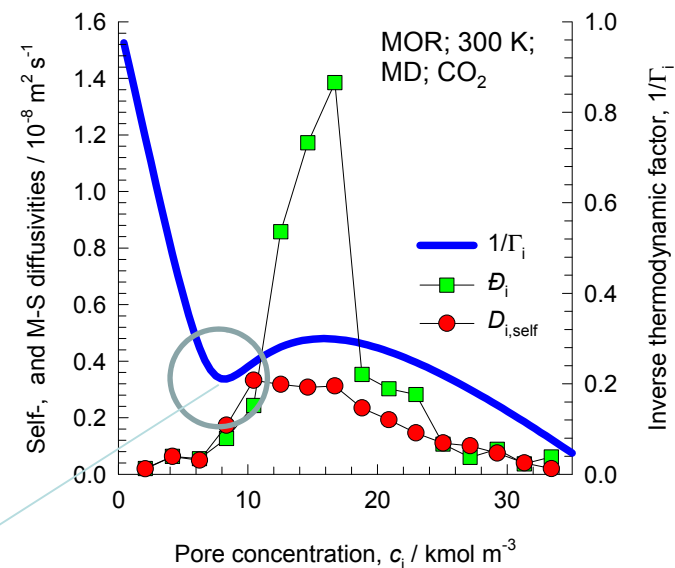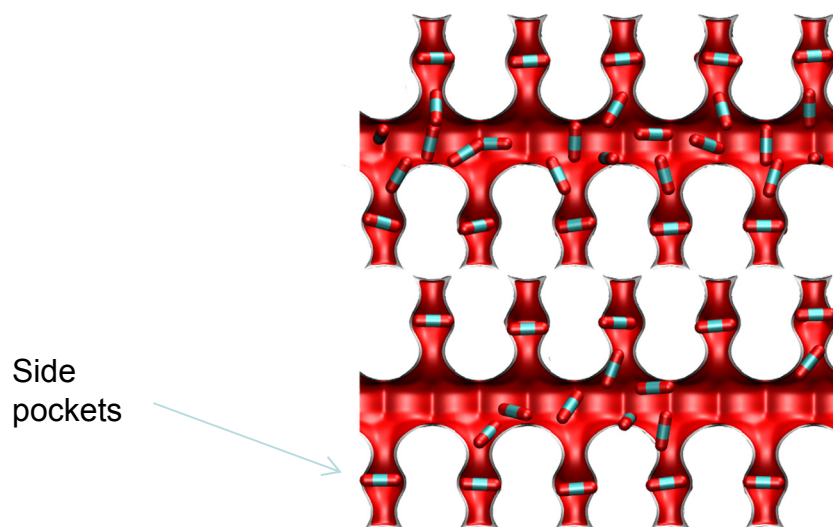

CO<sub>2</sub> preferentially locates in the side pockets as shown in snapshot. At a loading of  $4/\text{uc} = 8.35 \text{ kmol m}^{-3}$ , the pockets are full. This causes an infection. This also explains the high heat of adsorption due to snug fits in the side pockets

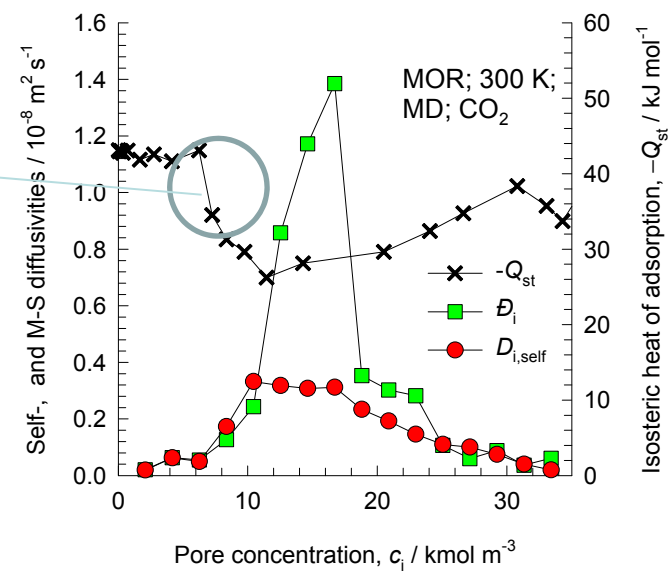

# **“Open” structures with large cavities**

# FAU-Si pore landscape

The sodalite cages are blocked in simulations and are not accessible to guest molecules; these are excluded for pore volume determination.

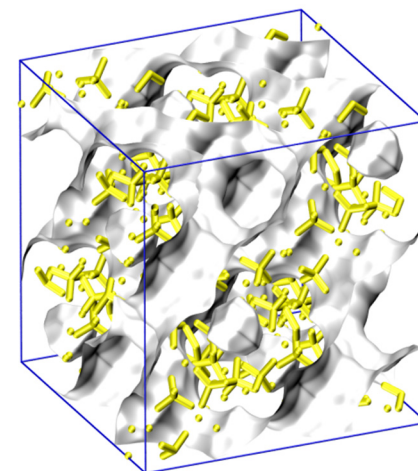

12-ring  
window of FAU

There are 8 cages per unit cell.  
The volume of one FAU cage is  $786 \text{ \AA}^3$ , larger in size than that of LTA ( $743 \text{ \AA}^3$ ) and DDR ( $278 \text{ \AA}^3$ ).

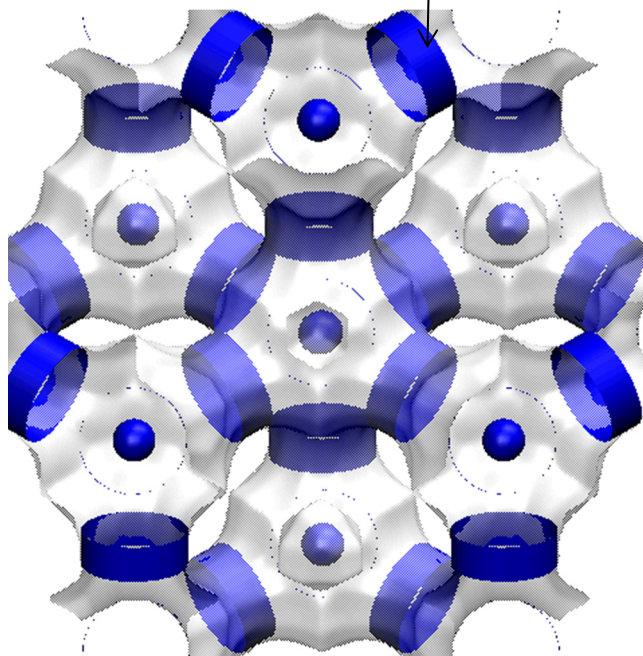

Structural information from: C. Baerlocher,  
L.B. McCusker, Database of Zeolite  
Structures, International Zeolite Association,  
<http://www.iza-structure.org/databases/>

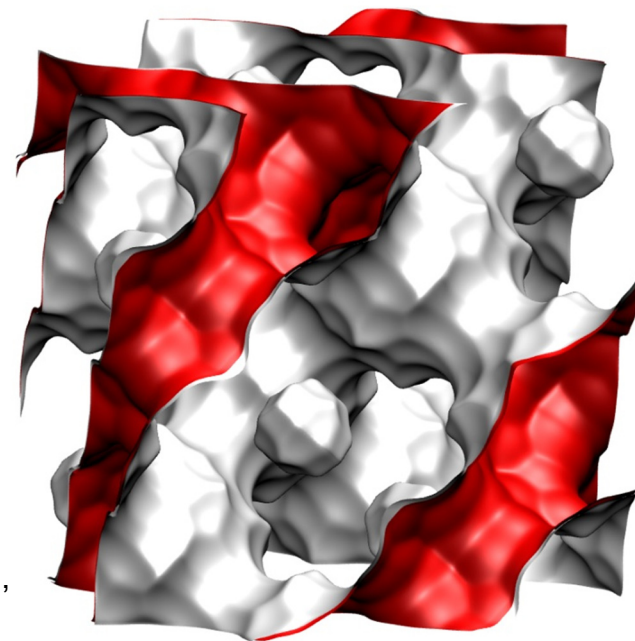

# FAU-Si window and pore dimensions

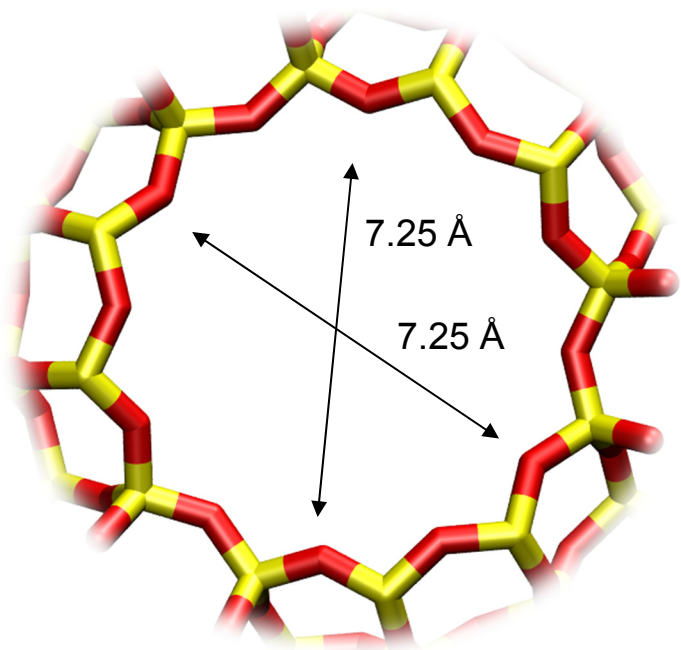

This plot of surface area versus pore dimension is determined using a combination of the DeLaunay triangulation method for pore dimension determination, and the procedure of Dürren for determination of the surface area.

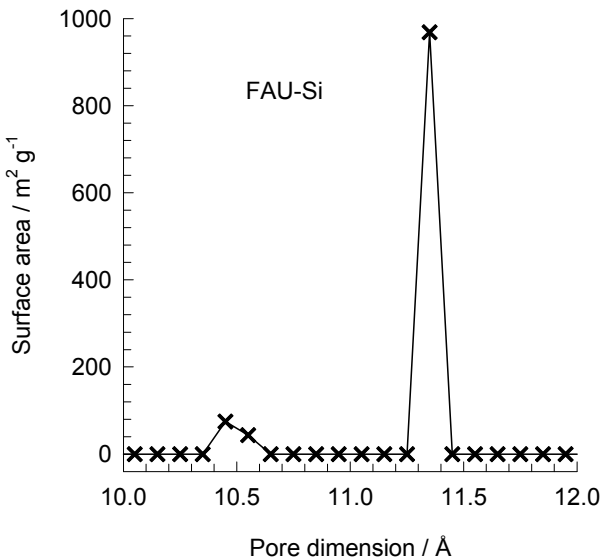

|                                                            | FAU-Si   |
|------------------------------------------------------------|----------|
| <i>a</i> / Å                                               | 24.28    |
| <i>b</i> / Å                                               | 24.28    |
| <i>c</i> / Å                                               | 24.28    |
| Cell volume / Å³                                           | 14313.51 |
| conversion factor for [molec/uc] to [mol per kg Framework] | 0.0867   |
| conversion factor for [molec/uc] to [kmol/m³]              | 0.2642   |
| <i>ρ</i> [kg/m3]                                           | 1338.369 |
| MW unit cell [g/mol (framework)]                           | 11536.28 |
| <i>φ</i> , fractional pore volume                          | 0.439    |
| open space / Å³/uc                                         | 6285.6   |
| Pore volume / cm³/g                                        | 0.328    |
| Surface area /m²/g                                         | 1086.0   |
| DeLaunay diameter / Å                                      | 7.37     |

# FAU-Si CBMC simulations of isotherms, and isosteric heats of adsorption

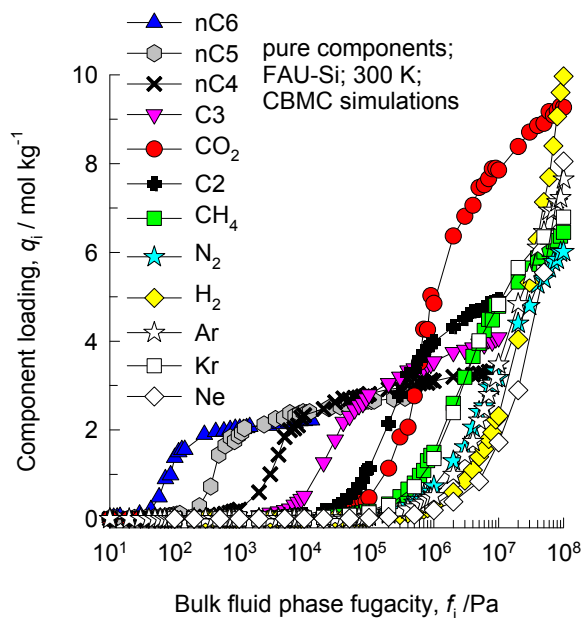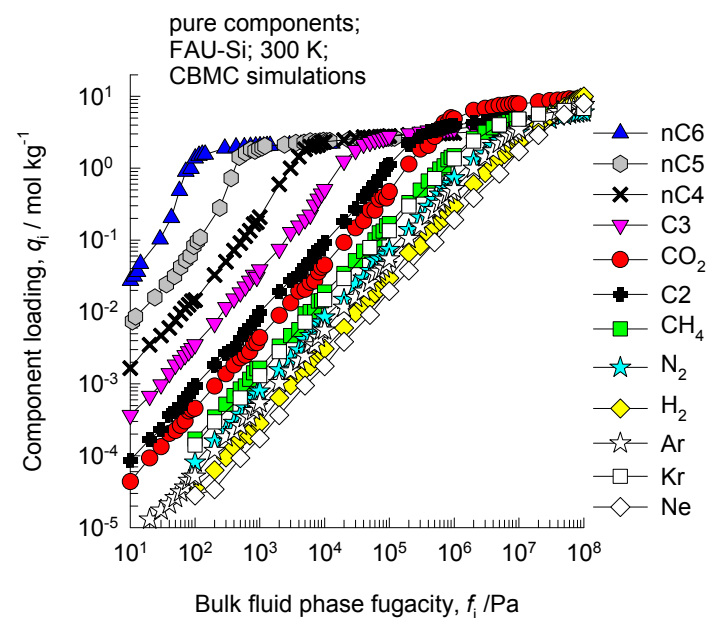

Note that C2 and C3 above refer to saturated alkanes

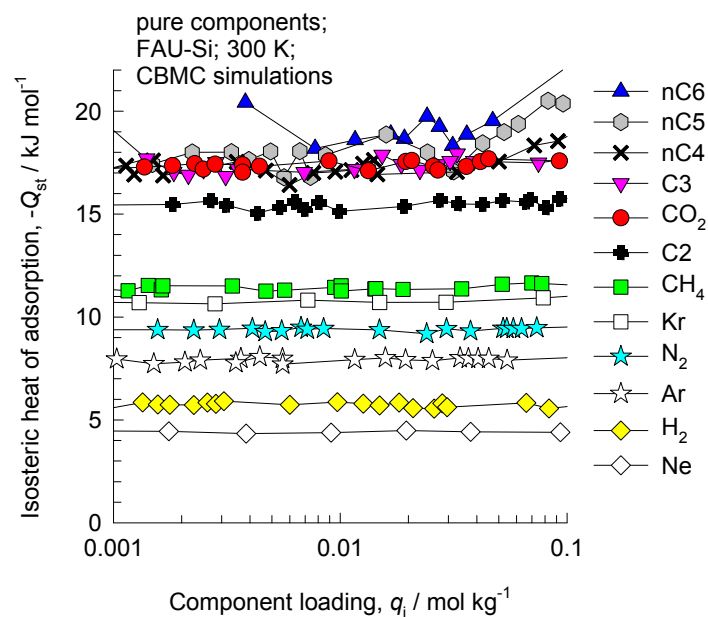

# Influence of Inverse Thermodynamic Factor on diffusivities

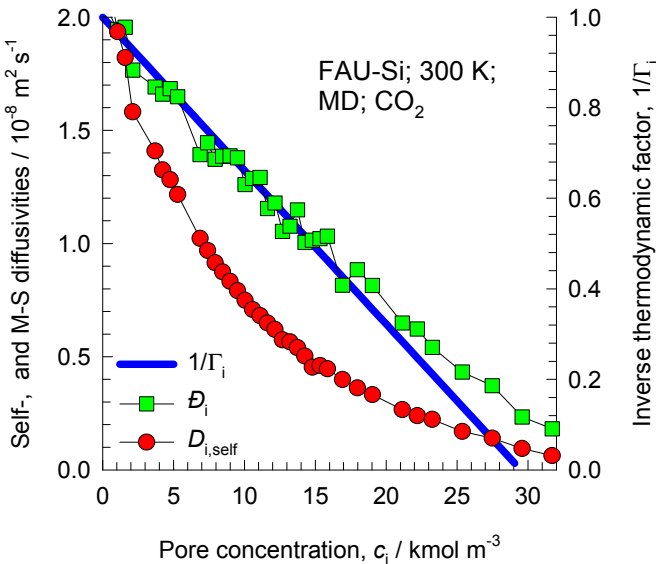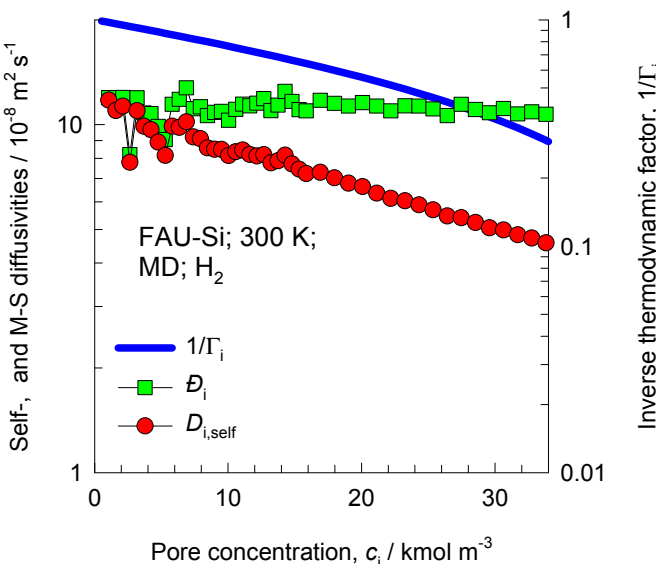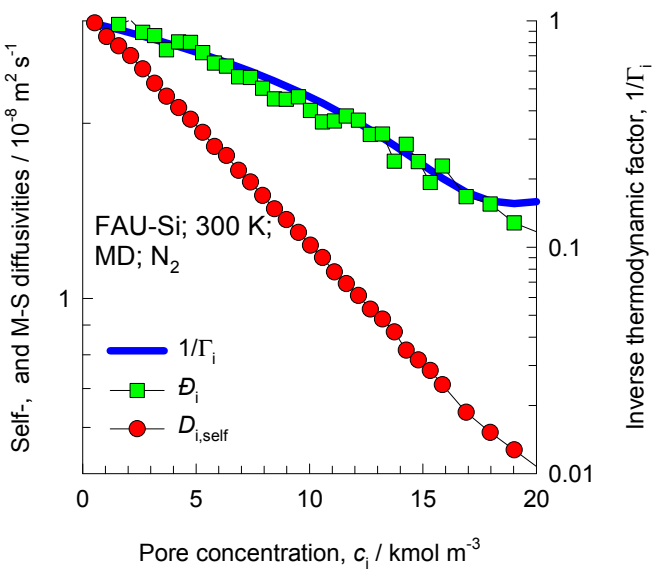

# Influence of Inverse Thermodynamic Factor on diffusivities

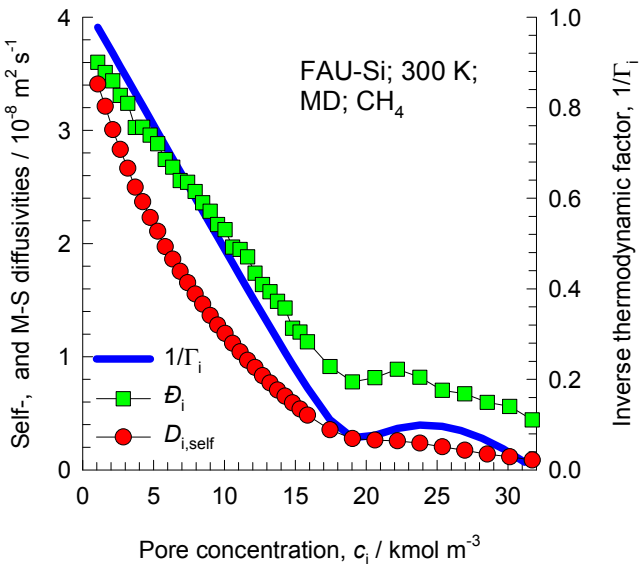

The isotherm inflection for methane gets reflected in the concentration dependence of the M-S diffusivity.

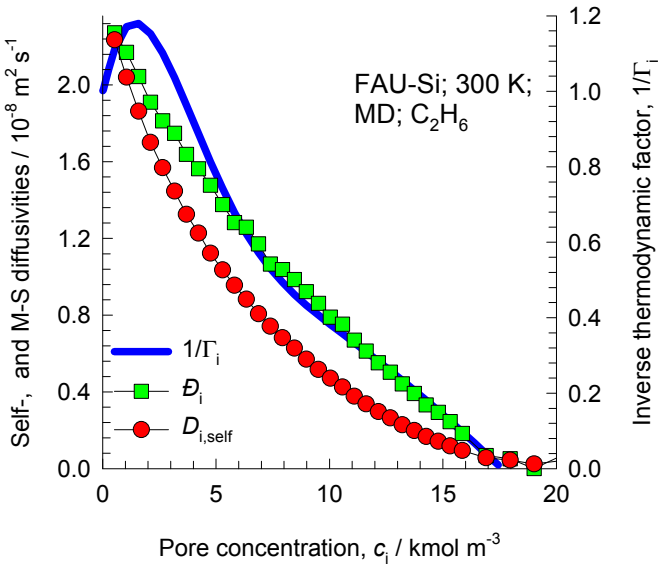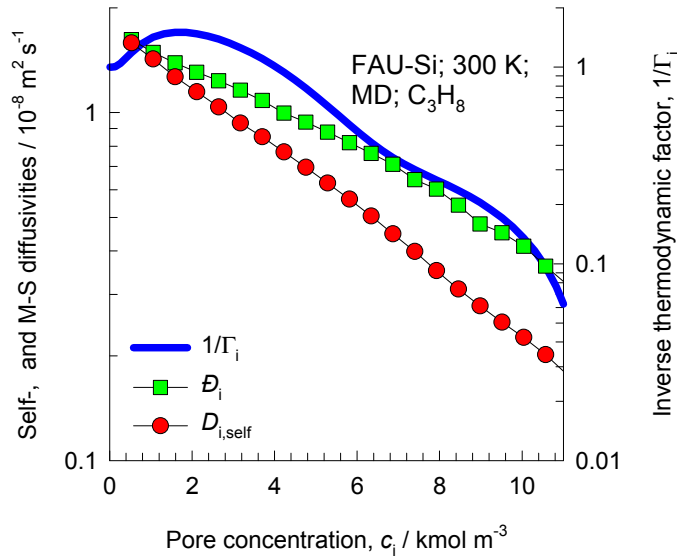

# Influence of Inverse Thermodynamic Factor on diffusivities

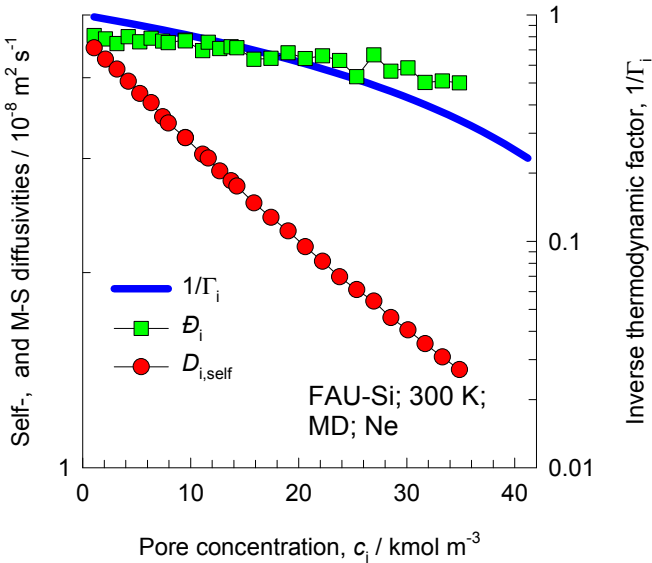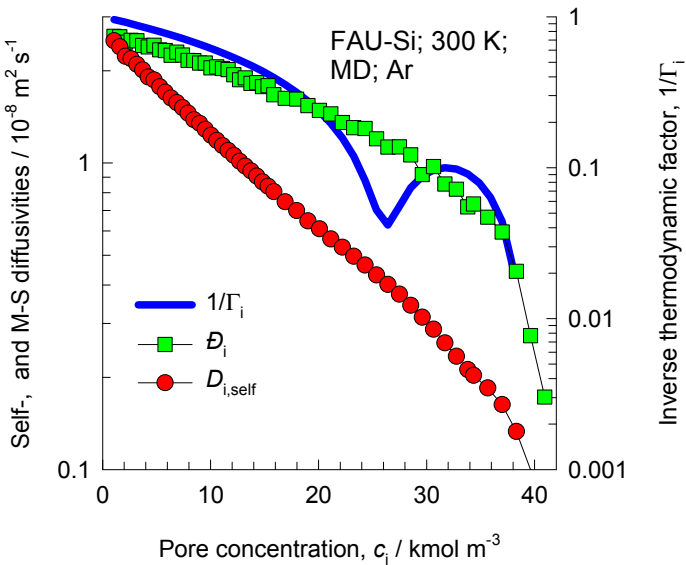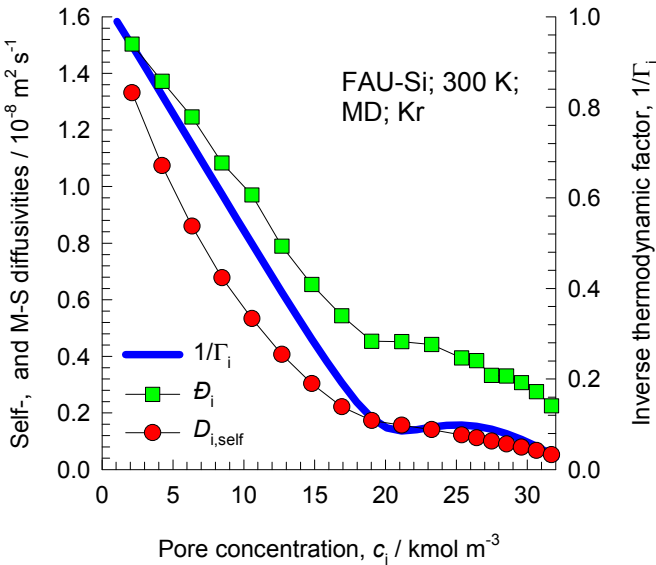

# FAU-Si CO<sub>2</sub> adsorption and diffusion

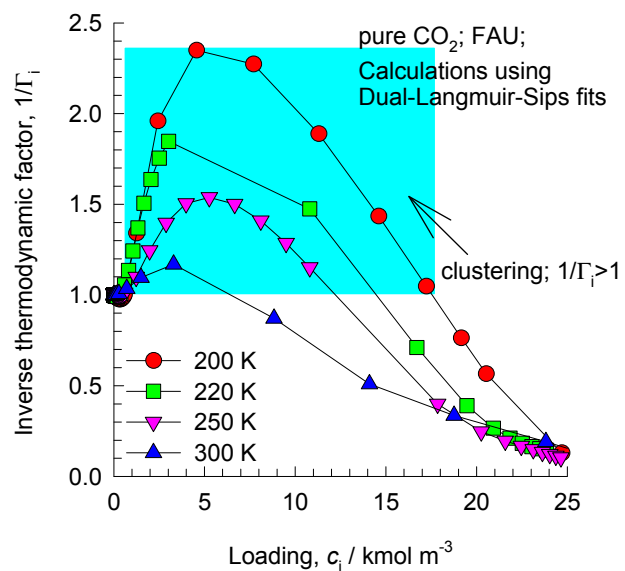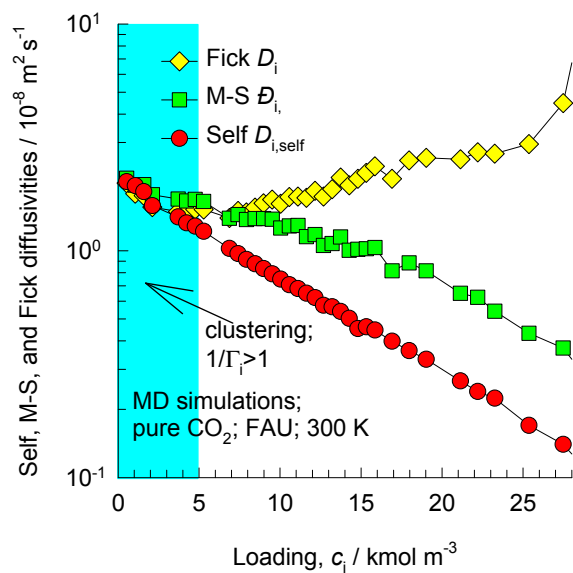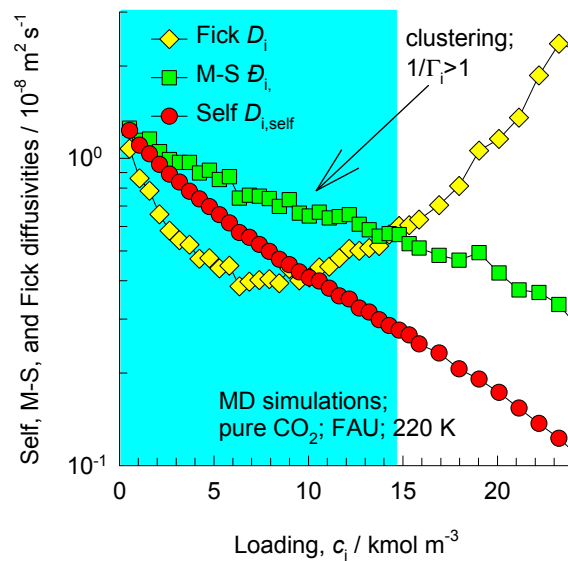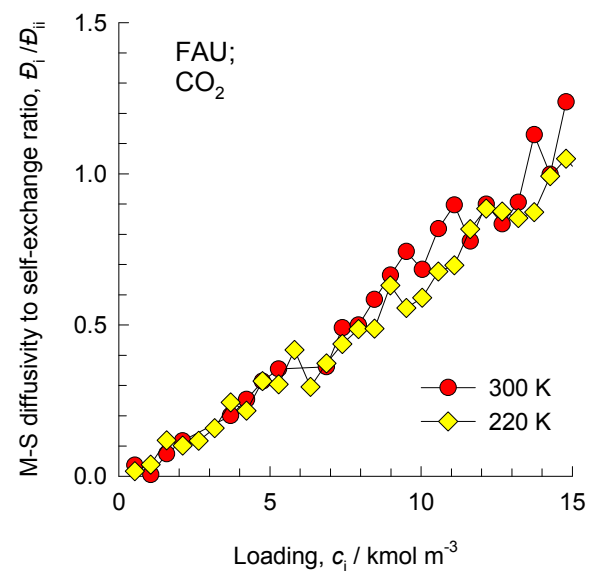

# FAU-Si CH<sub>4</sub> adsorption and diffusion

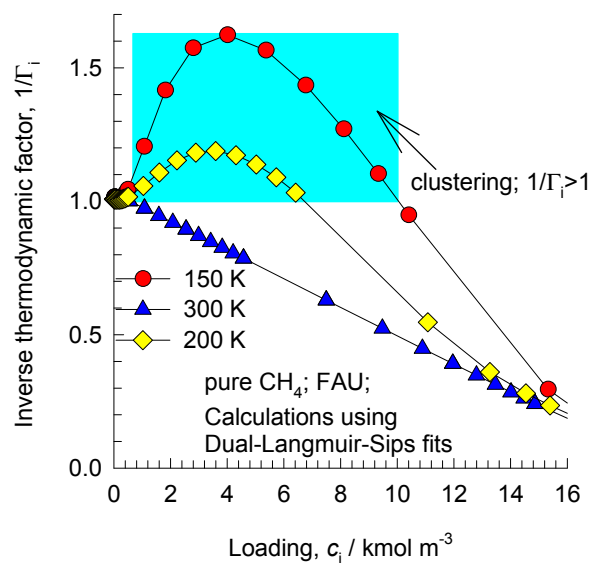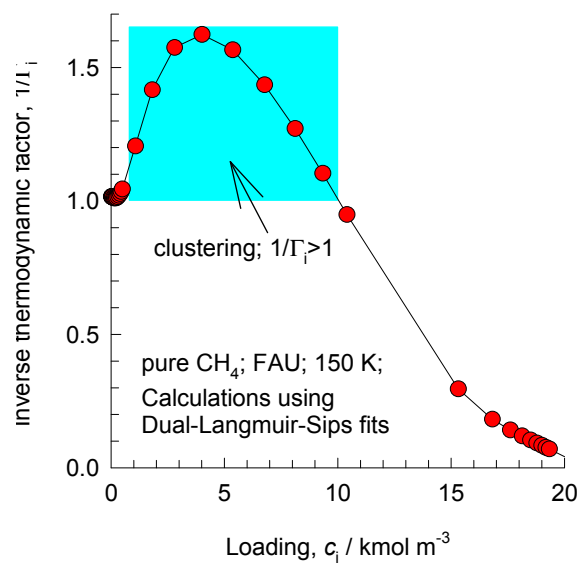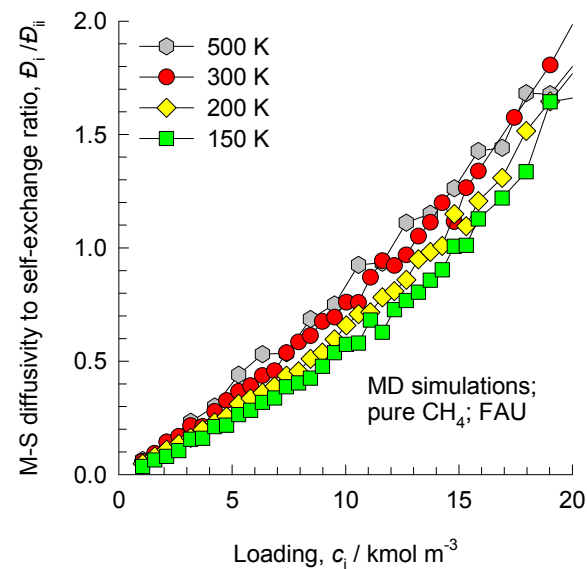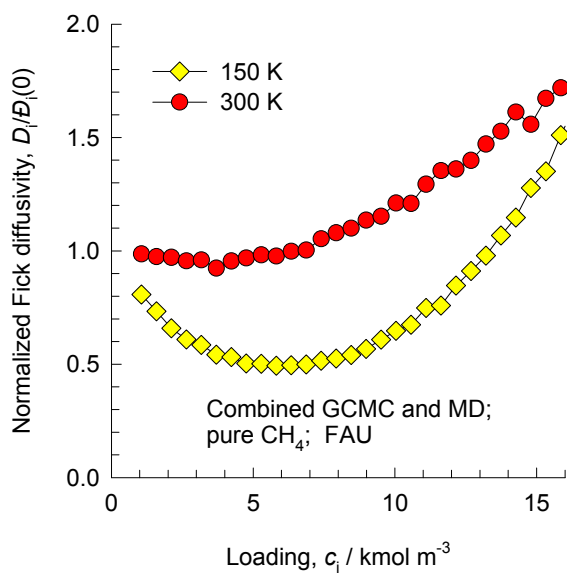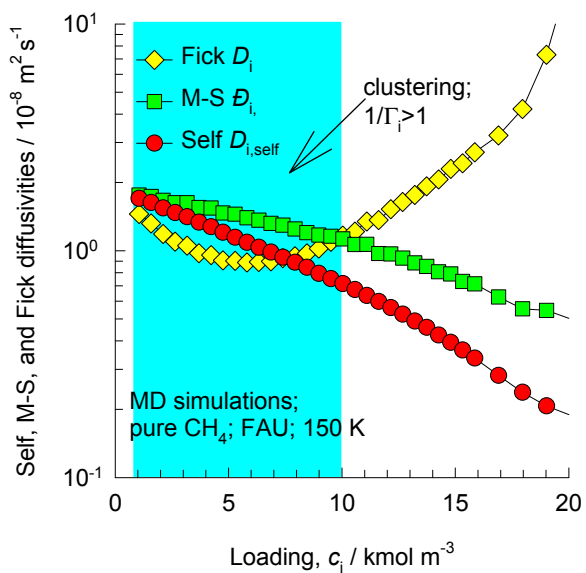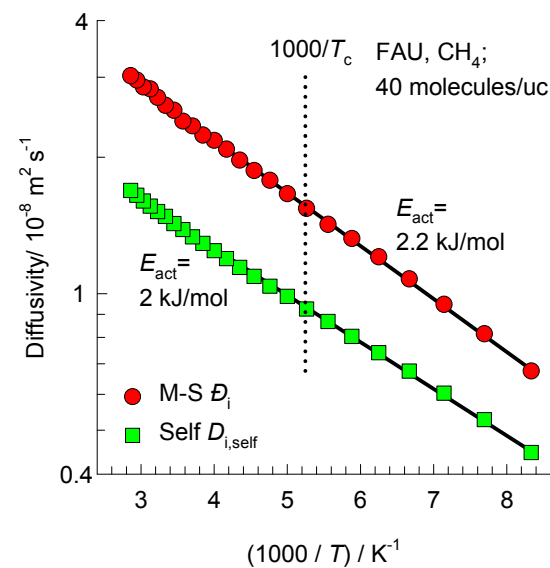

# FAU-Si Ar adsorption and diffusion

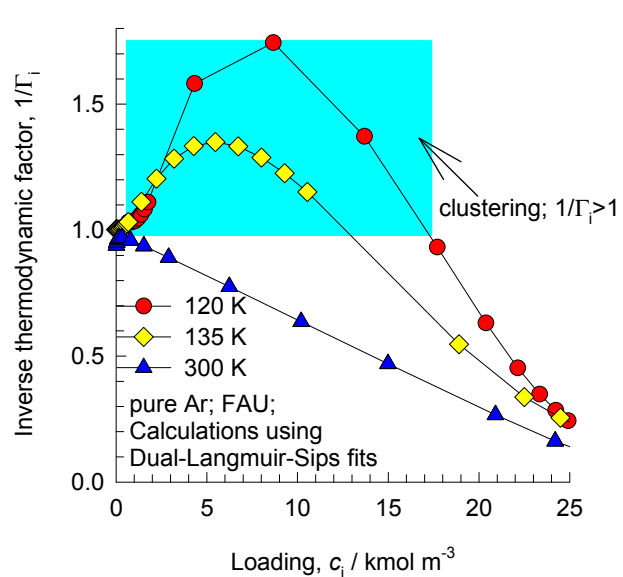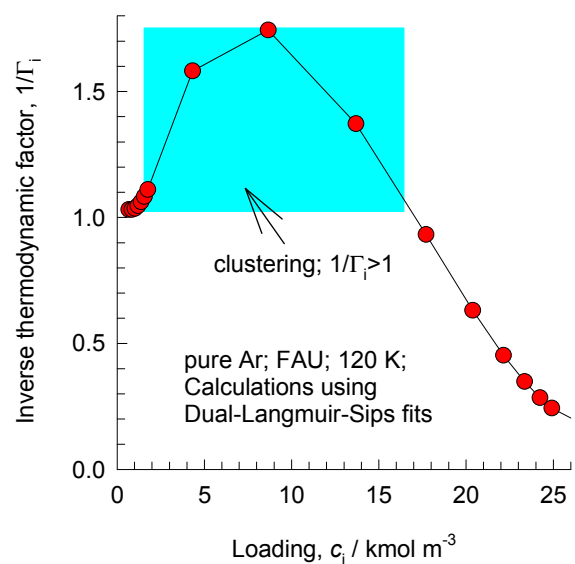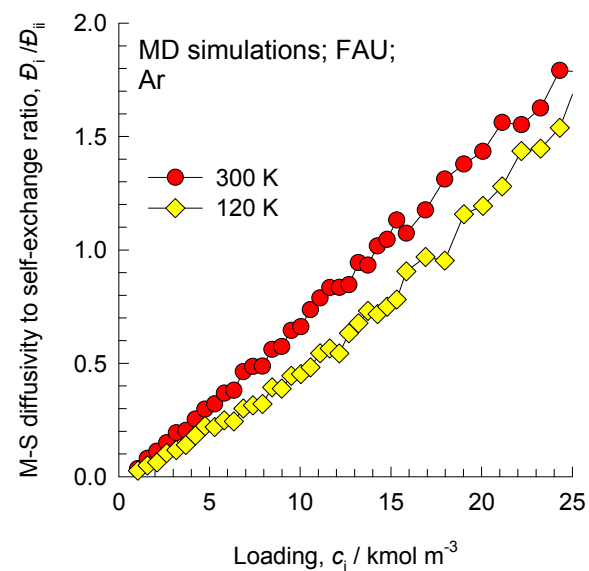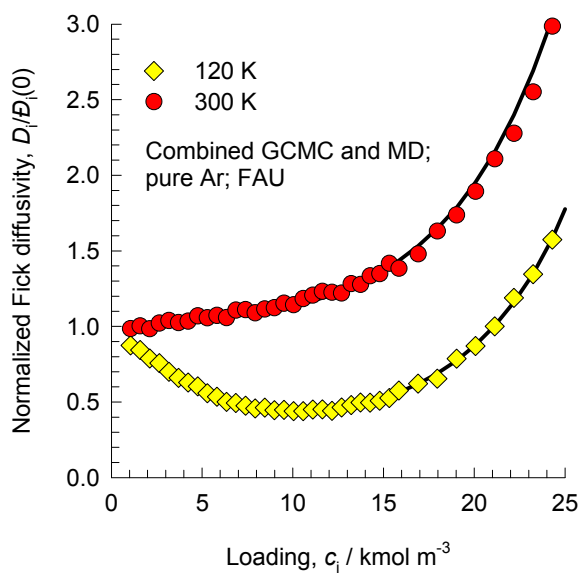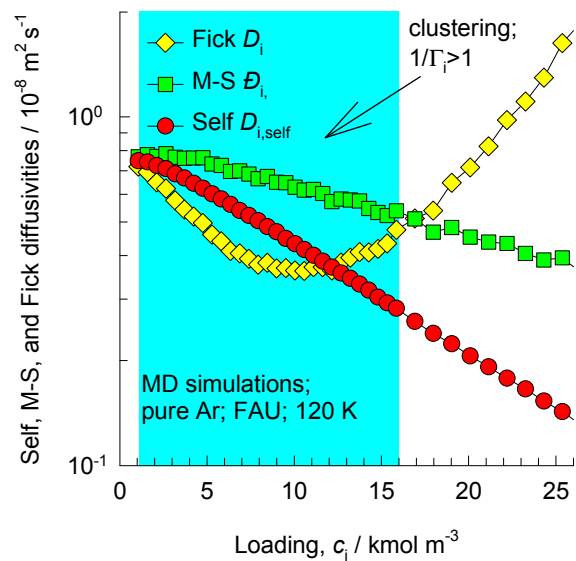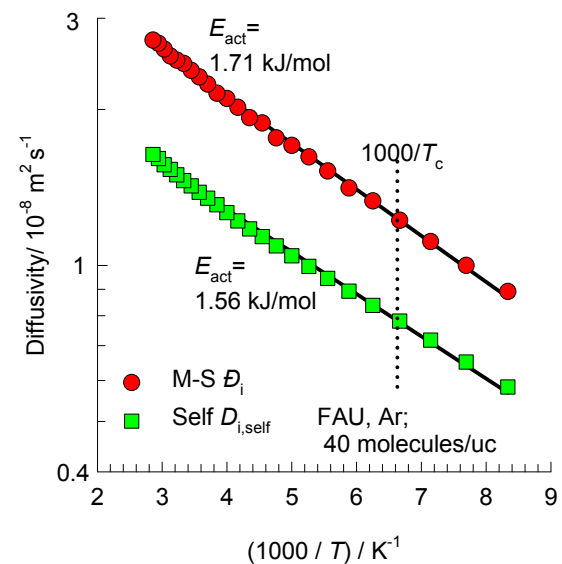

# FAU-Si CBMC simulations of isotherms and thermodynamic factors for n-alkanes

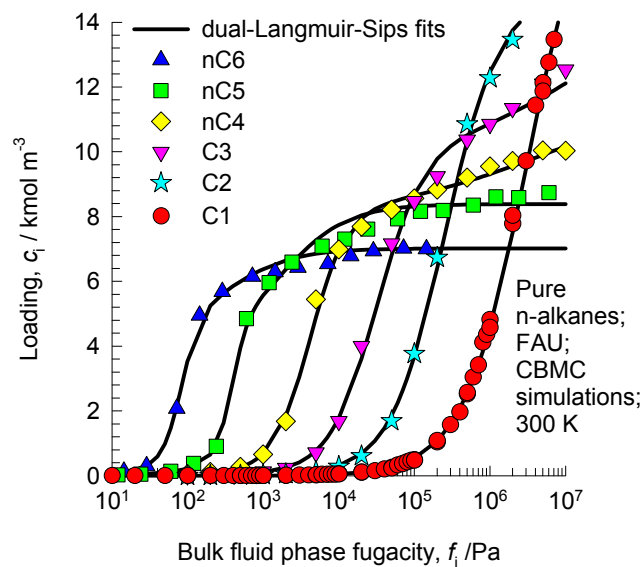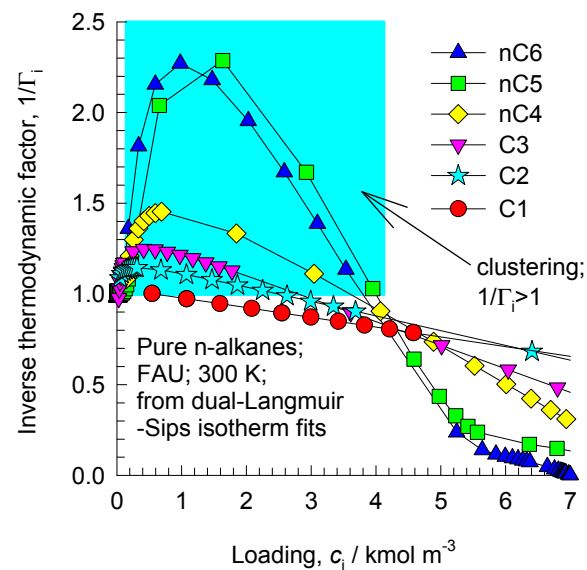

The degree of clustering increases with increasing chain length of n-alkanes.

# Influence of Inverse Thermodynamic Factor on diffusivities

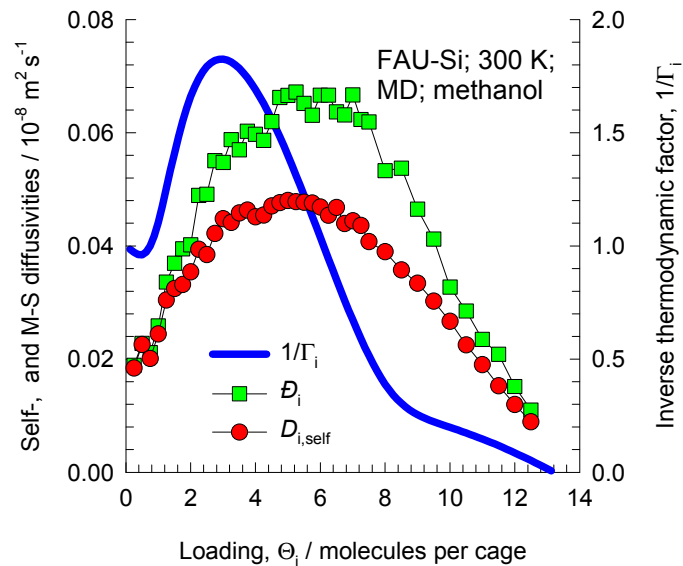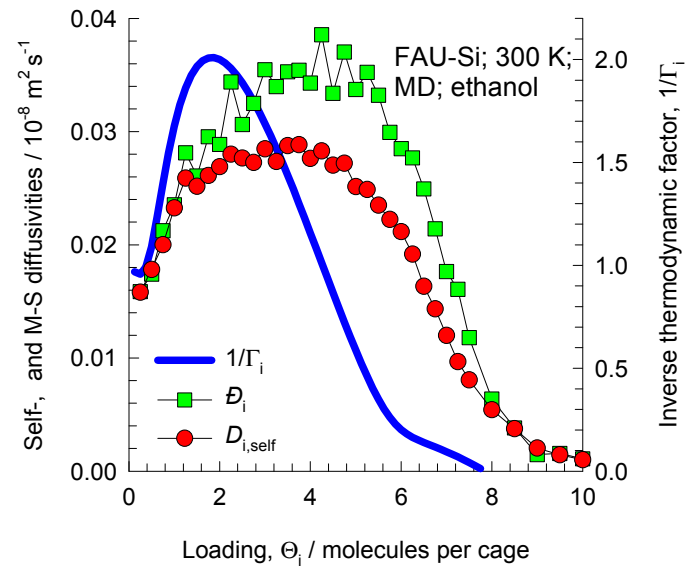

# NaY (138 Si, 54 Al, 54 Na+, Si/Al=2.55)

Blue spheres are cations

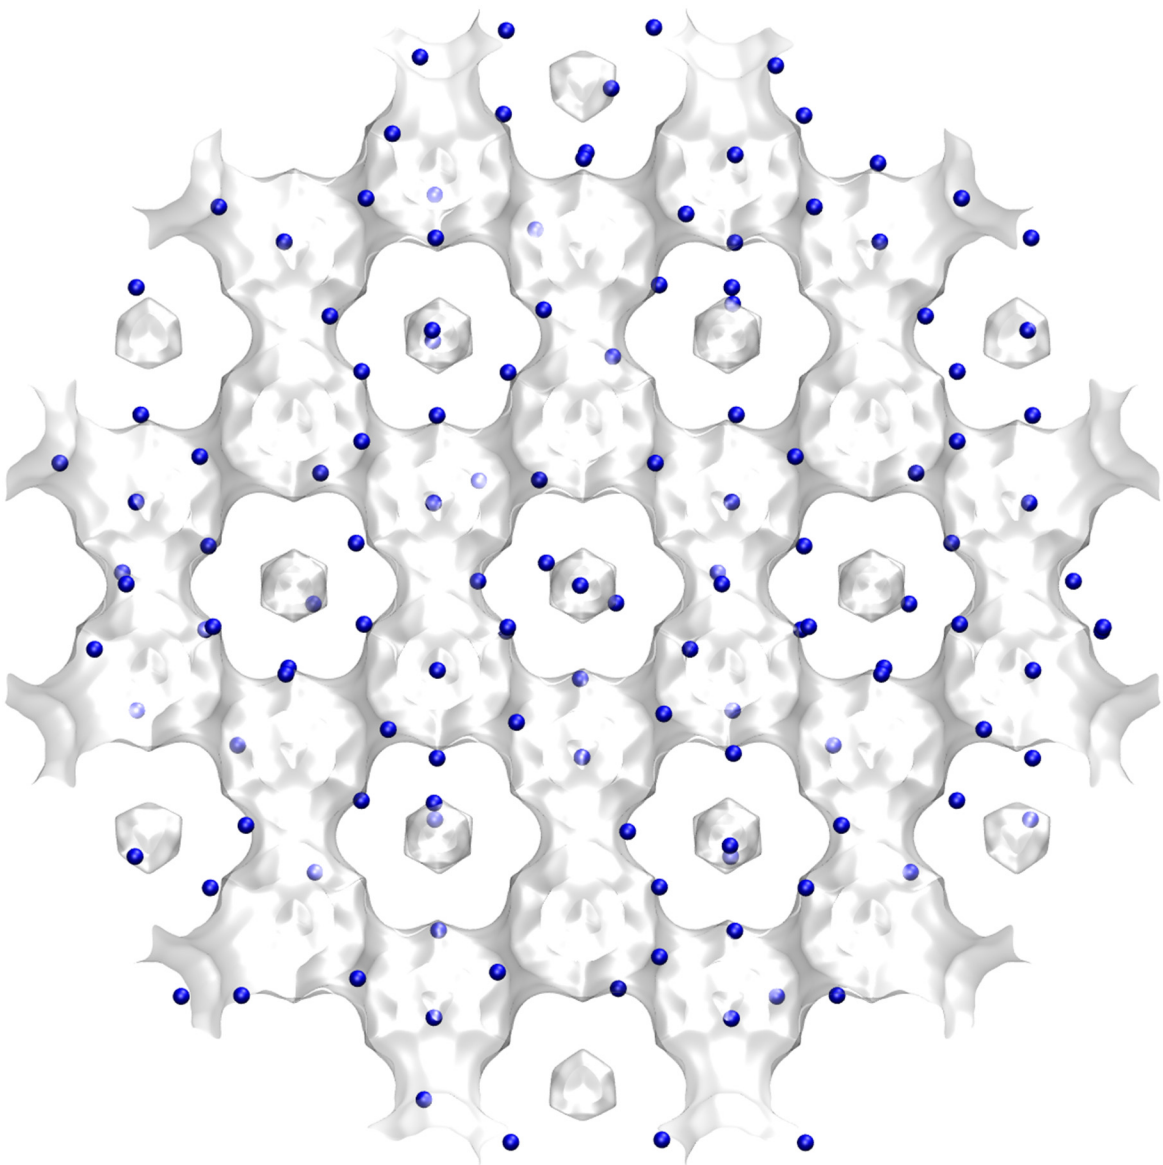

|                                                            | FAU-54Al |
|------------------------------------------------------------|----------|
| <i>a</i> /Å                                                | 25.028   |
| <i>b</i> /Å                                                | 25.028   |
| <i>c</i> /Å                                                | 25.028   |
| Cell volume / Å <sup>3</sup>                               | 15677.56 |
| conversion factor for [molec/uc] to [mol per kg Framework] | 0.0786   |
| conversion factor for [molec/uc] to [kmol/m <sup>3</sup> ] | 0.2596   |
| $\rho$ [kg/m <sup>3</sup> ] (with cations)                 | 1347.1   |
| MW unit cell [g/mol(framework+cations)]                    | 12718.08 |
| $\phi$ , fractional pore volume                            | 0.408    |
| open space / Å <sup>3</sup> /uc                            | 6396.6   |
| Pore volume / cm <sup>3</sup> /g                           | 0.303    |
| Surface area /m <sup>2</sup> /g                            |          |
| DeLaunay diameter /Å                                       | 7.37     |

# Influence of Inverse Thermodynamic Factor on diffusivities

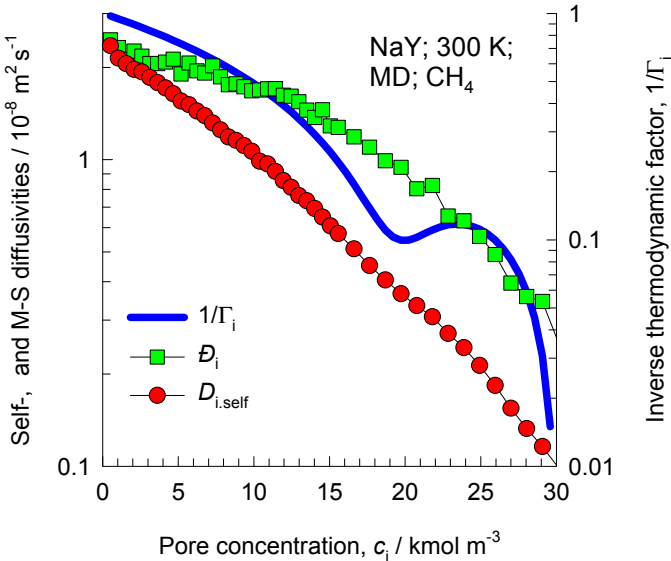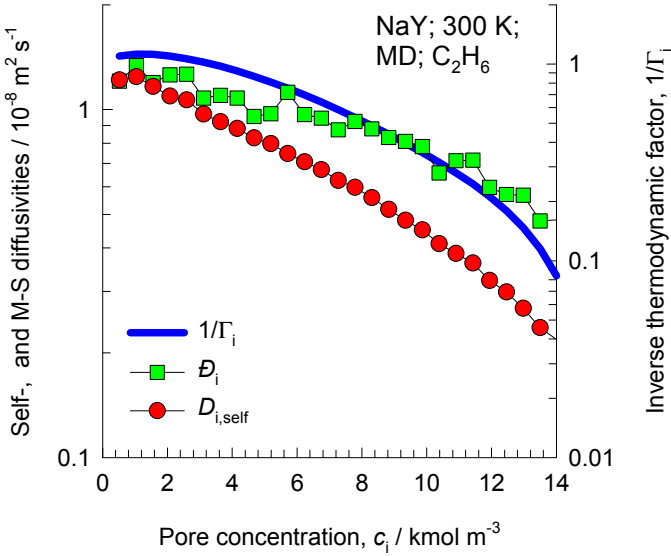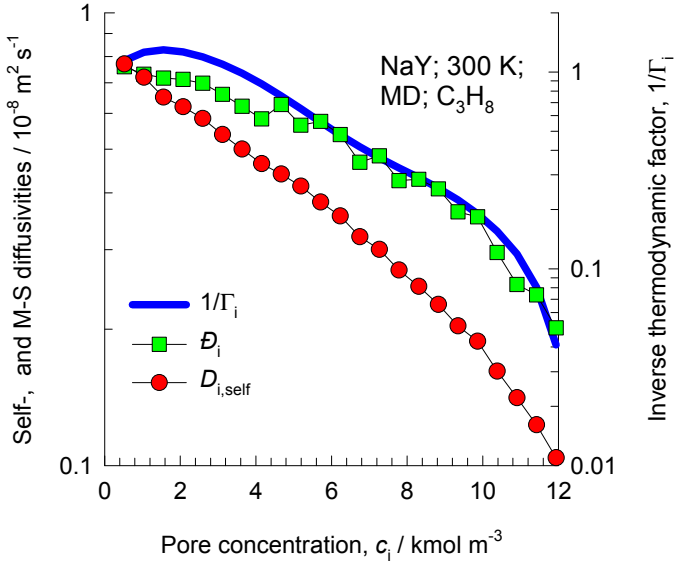

# NaY CH<sub>4</sub> self-diffusivity at 200 K

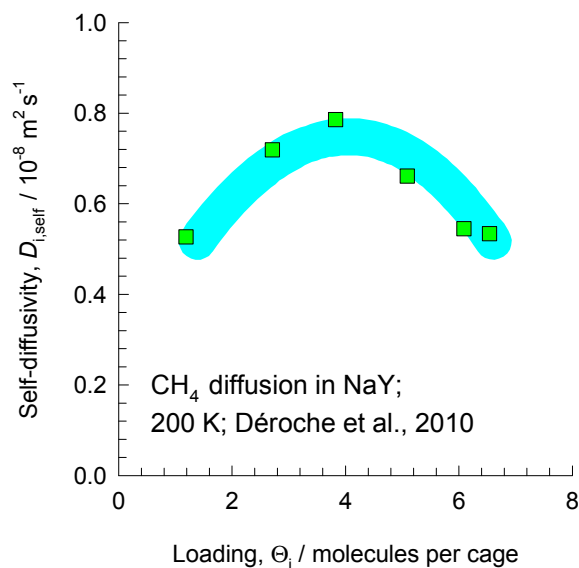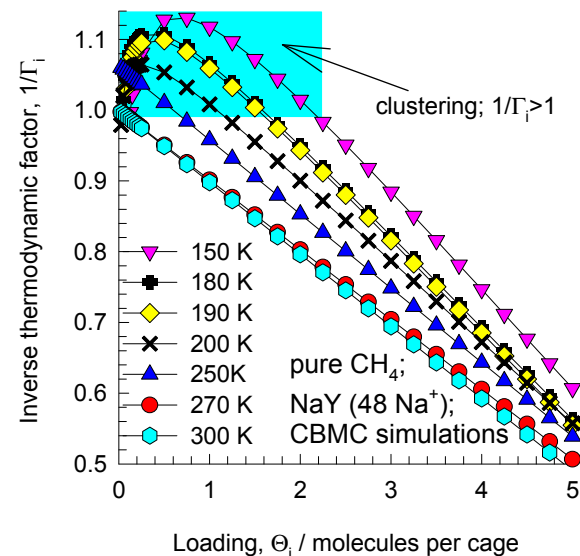

The QENS experimental data are re-plotted using the information in:

I. Déroche, G. Maurin, B.J. Borah, H. Jobic, S. Yashonath, Diffusion of pure CH<sub>4</sub> and its binary mixture with CO<sub>2</sub> in Faujasite NaY: A combination of neutron scattering experiments and Molecular Dynamics simulations, J. Phys. Chem. C 114 (2010) 5027-5034.

The CBMC simulations of the inverse thermodynamic factor are from our earlier works:

R. Krishna, J.M. van Baten, Investigating cluster formation in adsorption of CO<sub>2</sub>, CH<sub>4</sub>, and Ar in zeolites and metal organic frameworks at sub-critical temperatures, Langmuir 26 (2010) 3981-3992.

R. Krishna, J.M. van Baten, A rationalization of the Type IV loading dependence in the Kärger-Pfeifer classification of self-diffusivities, Microporous Mesoporous Mater. 142 (2011) 745-748.

# NaX (106 Si, 86 Al, 86 Na<sup>+</sup>, Si/Al=1.23)

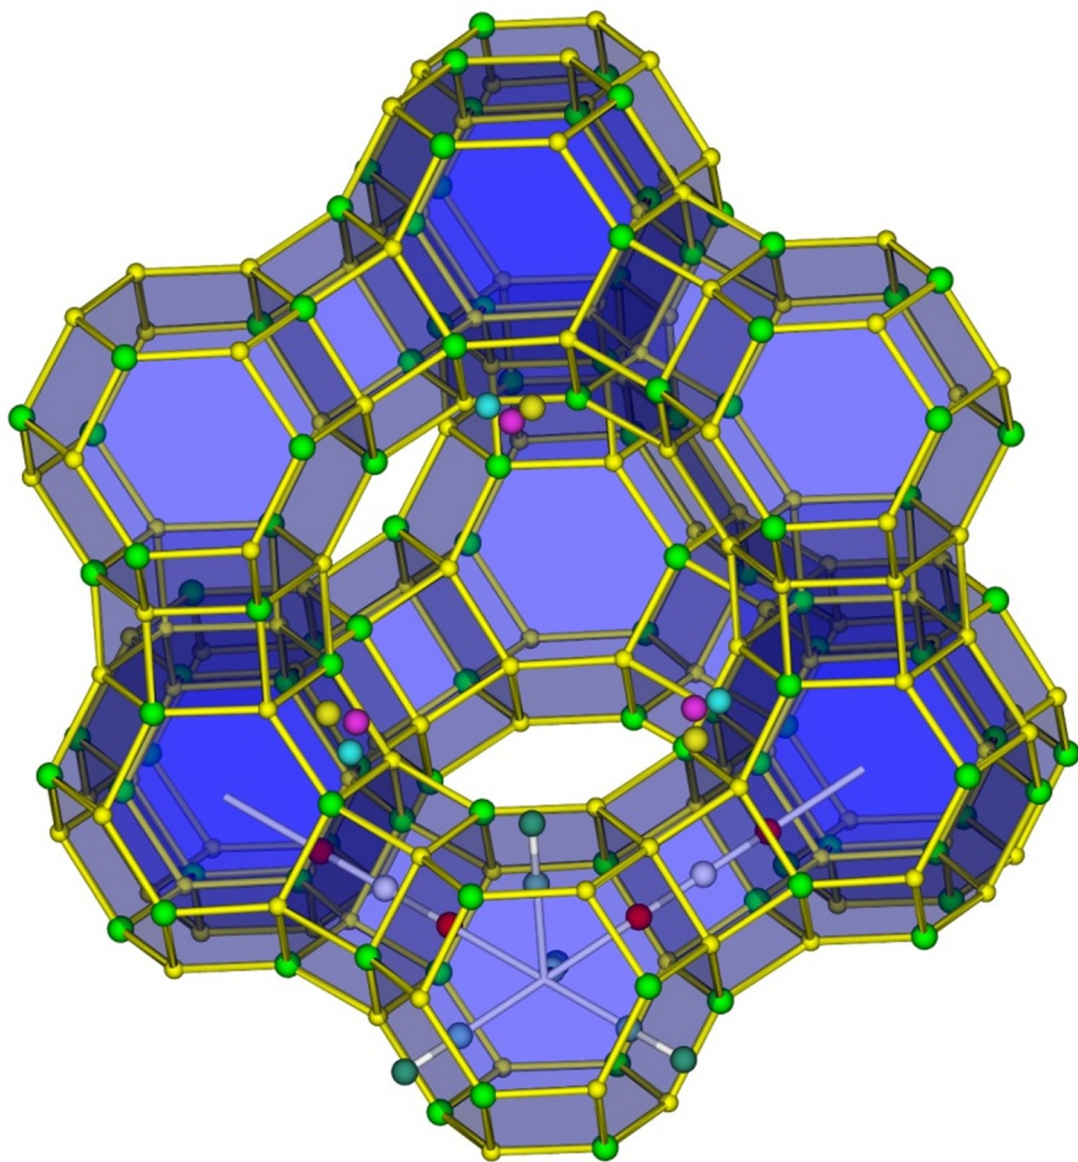

# NaX (106 Si, 86 Al, 86 Na+, Si/Al=1.23)

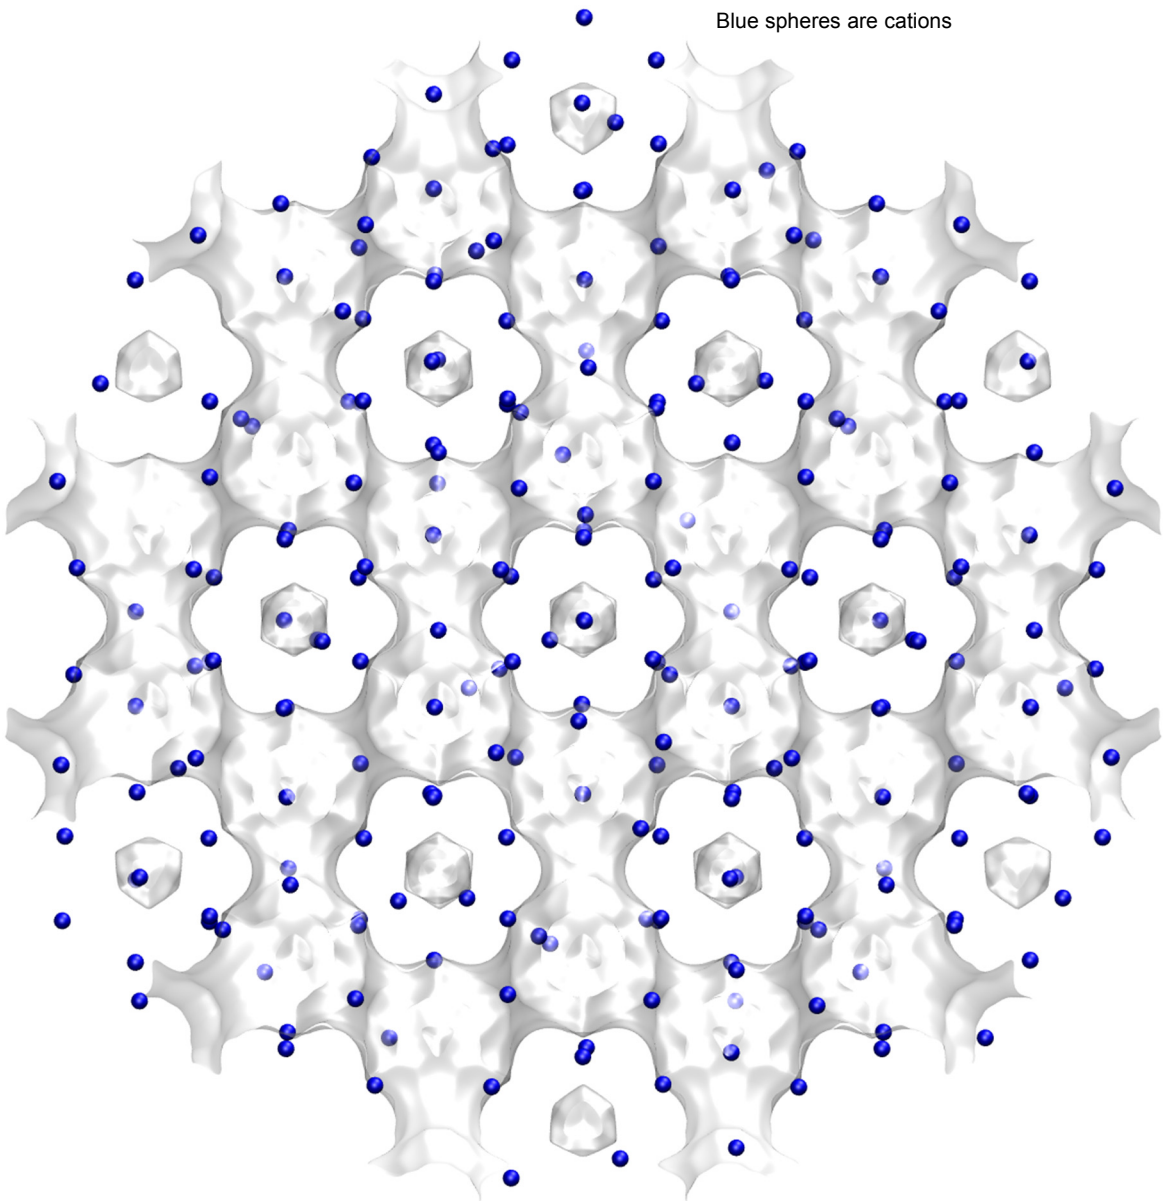

|                                                            | FAU-86Al |
|------------------------------------------------------------|----------|
| $a / \text{\AA}$                                           | 25.028   |
| $b / \text{\AA}$                                           | 25.028   |
| $c / \text{\AA}$                                           | 25.028   |
| Cell volume / $\text{\AA}^3$                               | 15677.56 |
| conversion factor for [molec/uc] to [mol per kg Framework] | 0.0745   |
| conversion factor for [molec/uc] to [kmol/m <sup>3</sup> ] | 0.2658   |
| $\rho$ [kg/m <sup>3</sup> ] (with cations)                 | 1421.277 |
| MW unit cell [g/mol(framework+cations)]                    | 13418.42 |
| $\phi$ , fractional pore volume                            | 0.399    |
| open space / $\text{\AA}^3/\text{uc}$                      | 6248.0   |
| Pore volume / cm <sup>3</sup> /g                           | 0.280    |
| Surface area / m <sup>2</sup> /g                           |          |
| DeLaunay diameter / $\text{\AA}$                           | 7.37     |

# Influence of Inverse Thermodynamic Factor on diffusivities

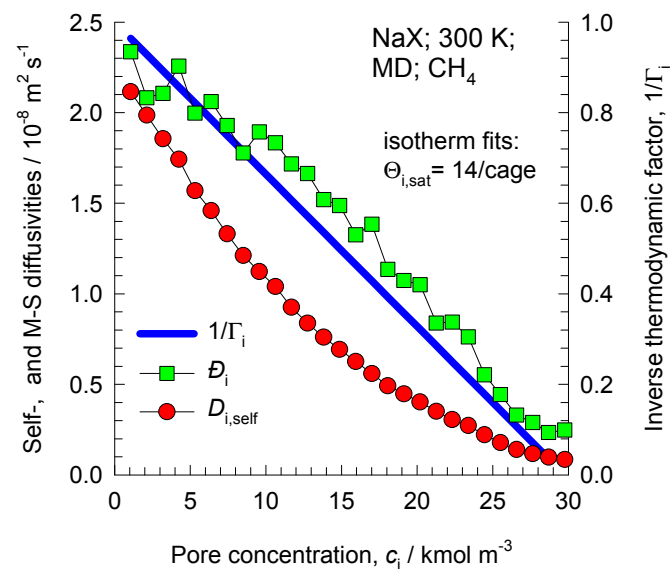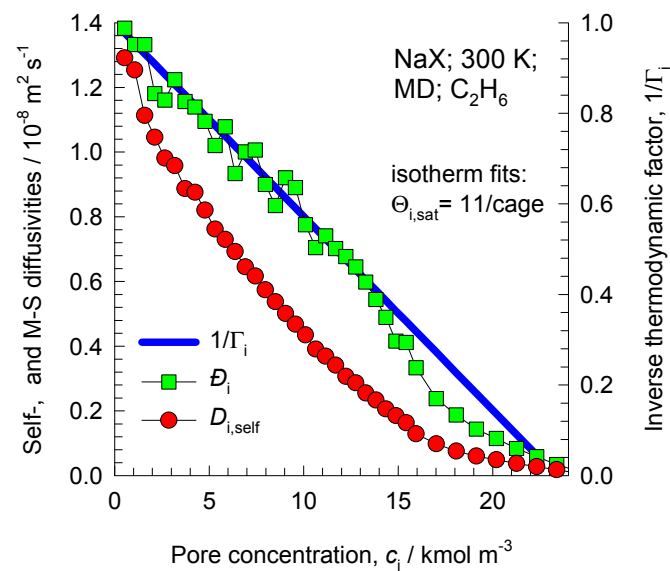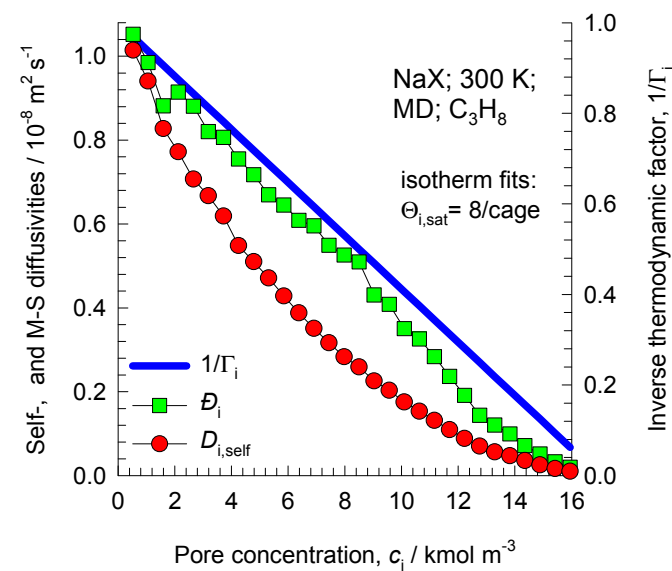

# NaX NMR experiments of Caro

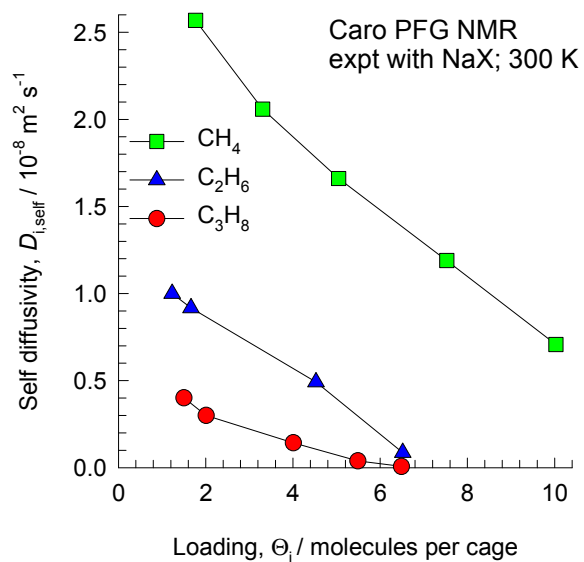

The experimental data are from

Caro, J.; Bülow, M.; Schirmer, W.; Kärger, J.; Heink, W.; Pfeifer, H. Microdynamics of methane, ethane and propane in ZSM-5 type zeolites. Journal of the Chemical Society, Faraday Transactions 1985, 81, 2541-2550.

# NaX: Transient uptake of n-heptane and benzene

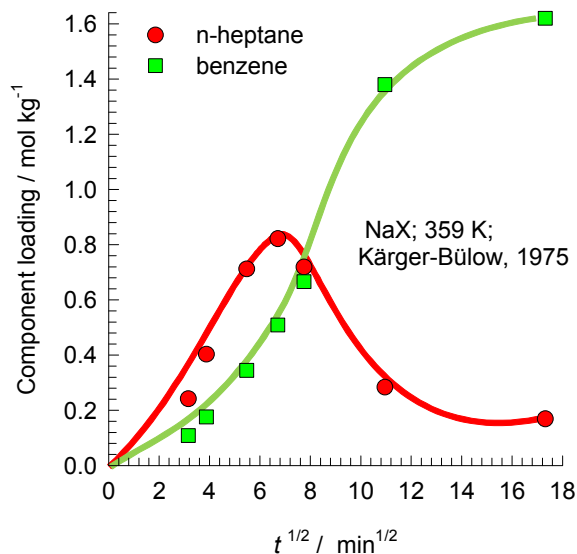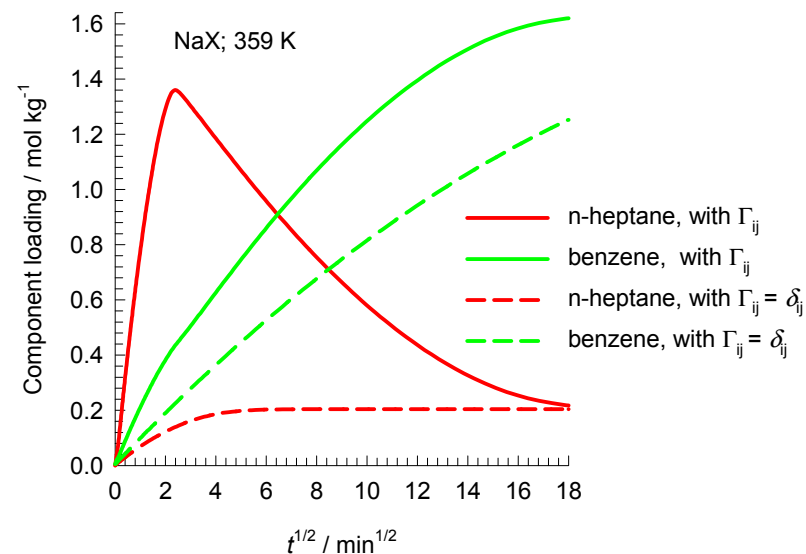

The data are re-plotted using the information contained in Kärger, J.; Bülow, M. Theoretical prediction of uptake behaviour in adsorption kinetics of binary gas mixtures using irreversible thermodynamics, Chem. Eng. Sci. 1975, 30, 893-896.

The overshoot in the nC7 uptake is a direct consequence of thermodynamic coupling caused by the off-diagonal elements of

$$\begin{bmatrix} \Gamma_{11} & \Gamma_{12} \\ \Gamma_{21} & \Gamma_{21} \end{bmatrix} \quad \text{where} \quad \Gamma_{ij} = \frac{q_i}{f_i} \frac{\partial f_i}{\partial q_j}$$

This has been demonstrated by Krishna, R. Multicomponent surface diffusion of adsorbed species - A description based on the generalized Maxwell-Stefan equations, Chem. Eng. Sci. 1990, 45, 1779-1791.

If the thermodynamic coupling is ignored, i.e. we assume  $\begin{bmatrix} \Gamma_{11} & \Gamma_{12} \\ \Gamma_{21} & \Gamma_{21} \end{bmatrix} = \begin{bmatrix} 1 & 0 \\ 0 & 1 \end{bmatrix}$

the nC7 overshoot disappears.

# CuBTC pore landscapes

The structural information for CuBTC ( $= \text{Cu}_3(\text{BTC})_2$  with BTC = 1,3,5-benzenetricarboxylate) have been taken from

S.S.Y. Chui, S.M.F. Lo, J.P.H. Charmant, A.G. Orpen, I.D. Williams, A chemically functionalizable nanoporous material  $[\text{Cu}_3(\text{TMA})_2(\text{H}_2\text{O})_3]_n$ , *Science* 283 (1999) 1148-1150.

*The crystal structure of Chui et al. includes axial oxygen atoms weakly bonded to the Cu atoms, which correspond to water ligands. Our simulations have been performed on the dry CuBTC with these oxygen atoms removed.*

Q. Yang, C. Zhong, Electrostatic-Field-Induced Enhancement of Gas Mixture Separation in Metal-Organic Frameworks: A Computational Study, *ChemPhysChem* 7 (2006) 1417-1421.

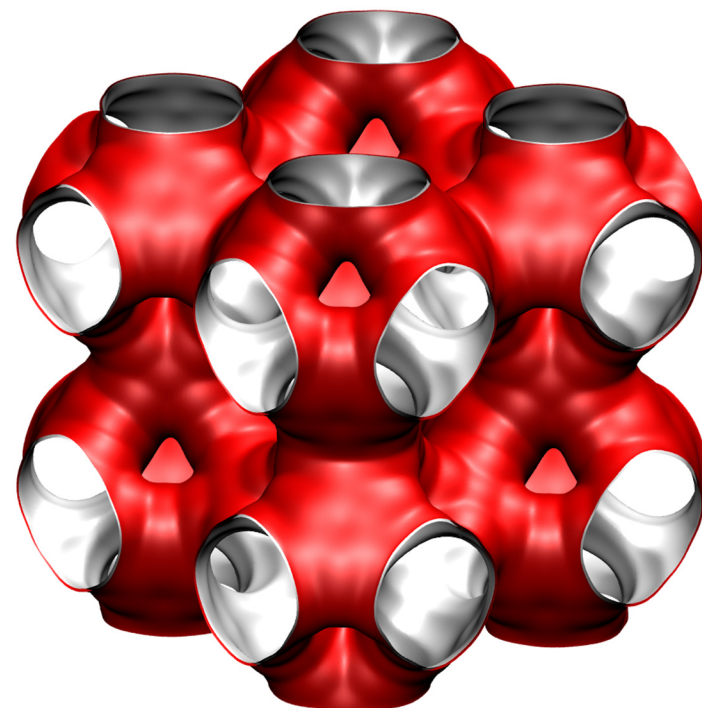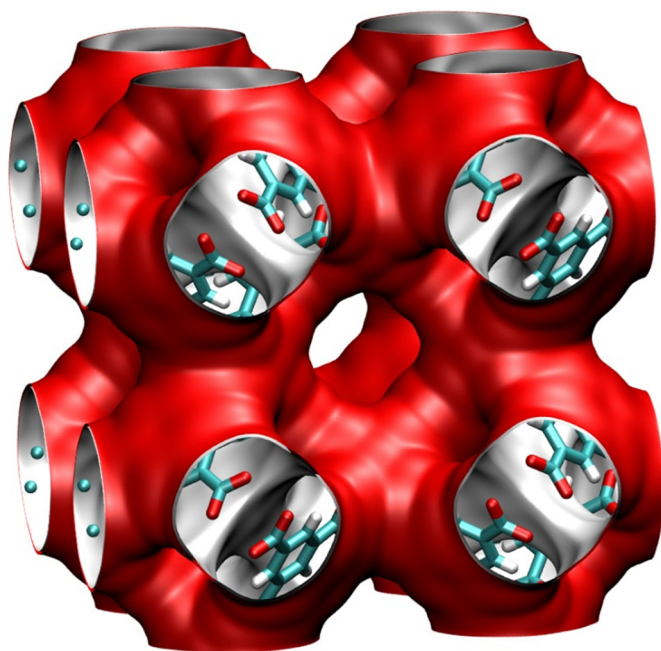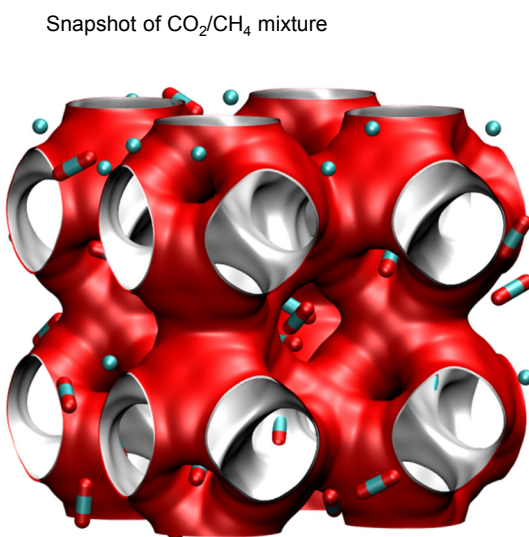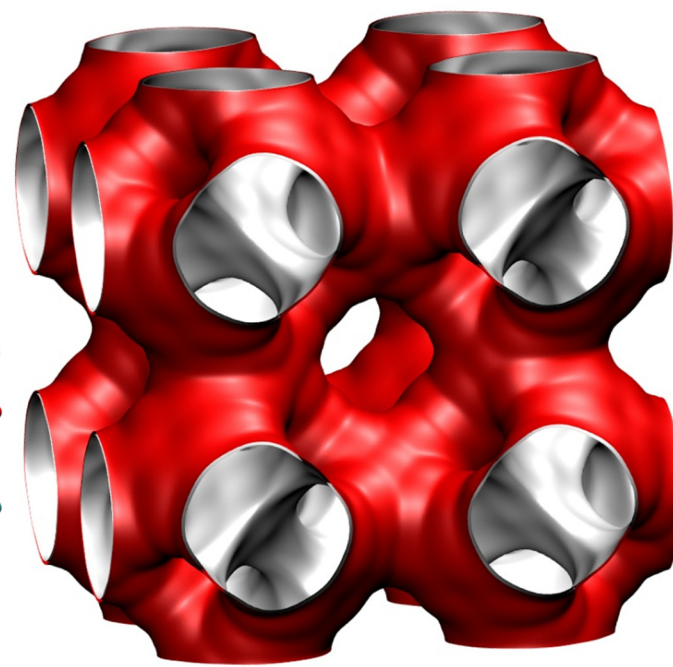

# CuBTC pore dimensions

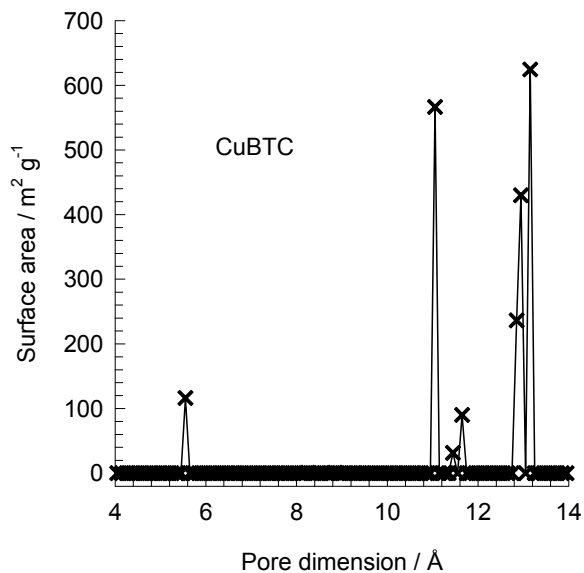

This plot of surface area versus pore dimension is determined using a combination of the DeLaunay triangulation method for pore dimension determination, and the procedure of Dören for determination of the surface area.

|                                                            | CuBTC    |
|------------------------------------------------------------|----------|
| <i>a</i> /Å                                                | 26.343   |
| <i>b</i> /Å                                                | 26.343   |
| <i>c</i> /Å                                                | 26.343   |
| Cell volume / Å³                                           | 18280.82 |
| conversion factor for [molec/uc] to [mol per kg Framework] | 0.1034   |
| conversion factor for [molec/uc] to [kmol/m³]              | 0.1218   |
| $\rho$ [kg/m3]                                             | 878.8298 |
| MW unit cell [g/mol(framework)]                            | 9674.855 |
| $\phi$ , fractional pore volume                            | 0.746    |
| open space / Å³/uc                                         | 13628.4  |
| Pore volume / cm³/g                                        | 0.848    |
| Surface area /m²/g                                         | 2097.0   |
| DeLaunay diameter /Å                                       | 6.23     |

The CuBTC structure consists of two types of “cages” and two types of “windows” separating these cages. Large cages are inter-connected by 9 Å windows of square cross-section. The large cages are also connected to tetrahedral-shaped pockets of ca. 6 Å size through triangular-shaped windows of ca. 4.6 Å size

# CuBTC CBMC simulations of isotherms, and isosteric heats of adsorption

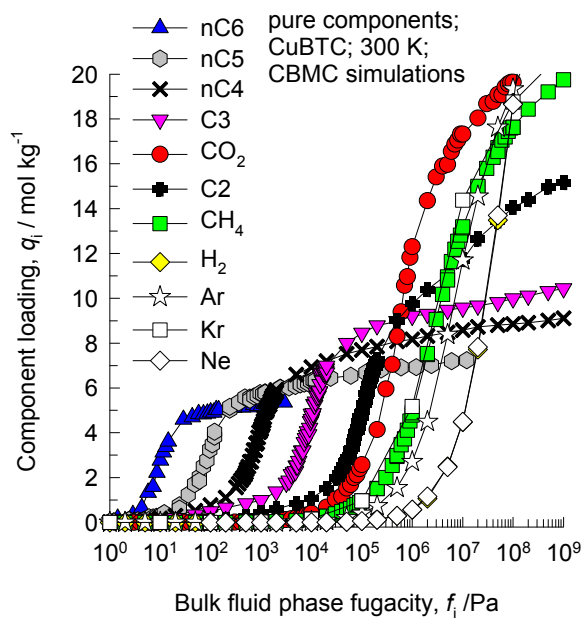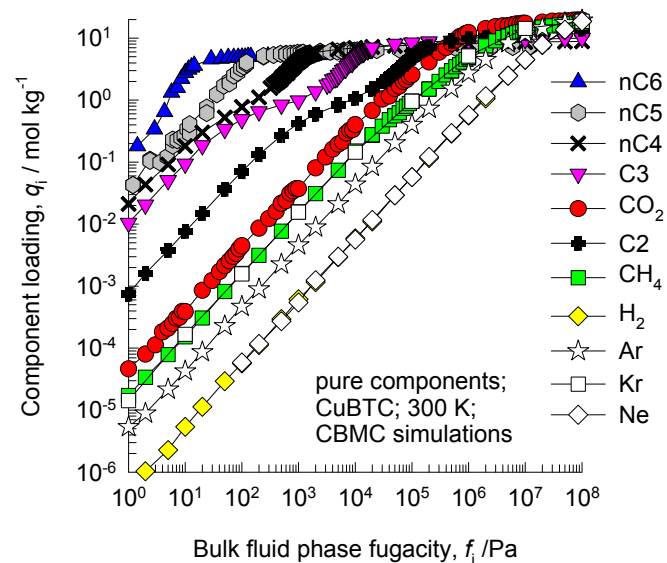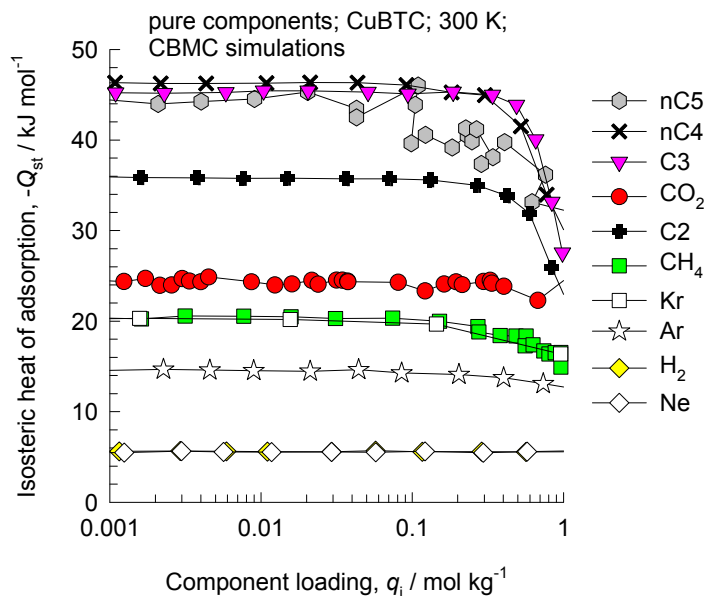

## Influence of $-Q_{st}$ on diffusivities

Location of  $\text{CH}_4$   
inside the tetrahedral  
pockets

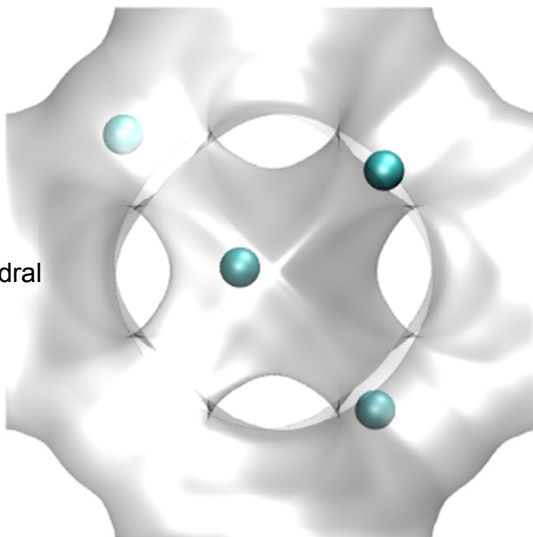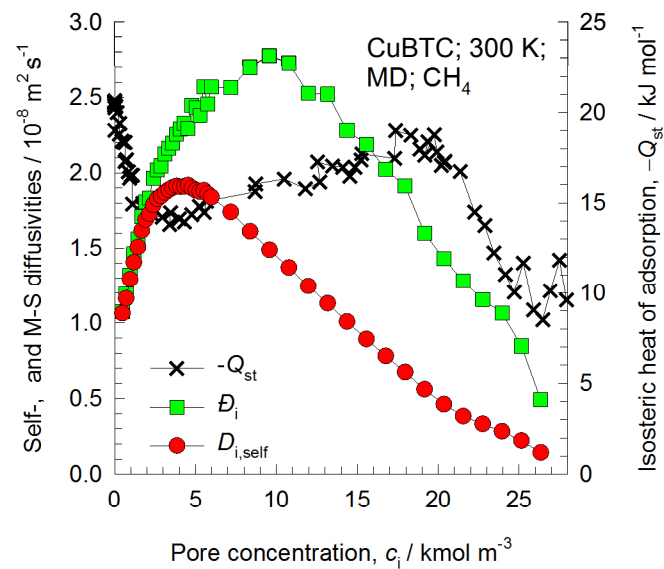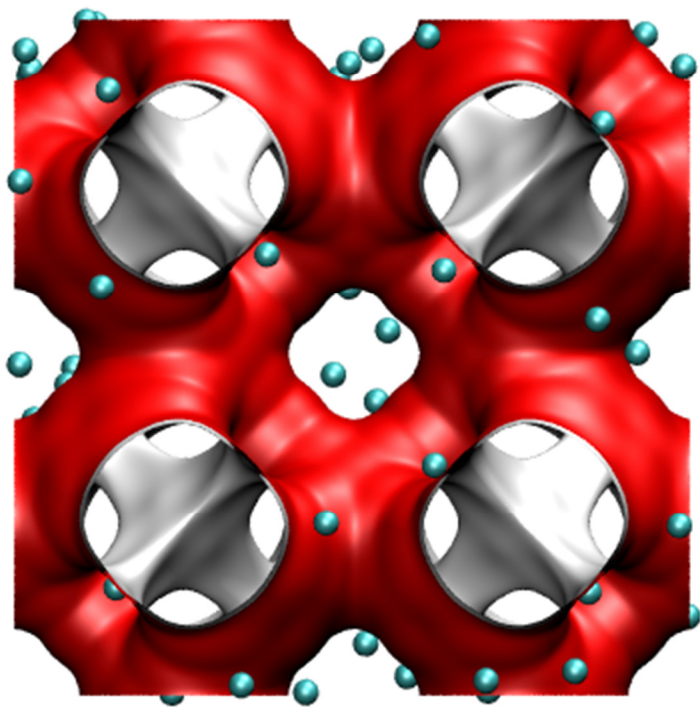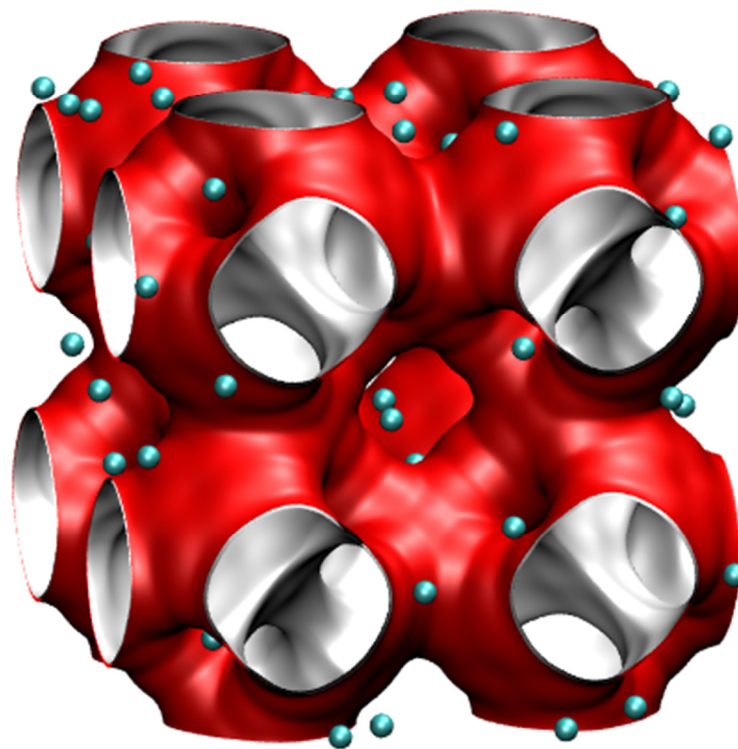

## Influence of $-Q_{st}$ on diffusivities

Location of  $C_2H_6$   
inside the tetrahedral  
pockets

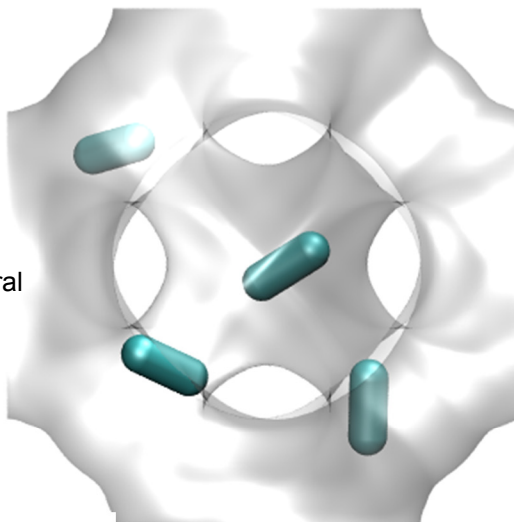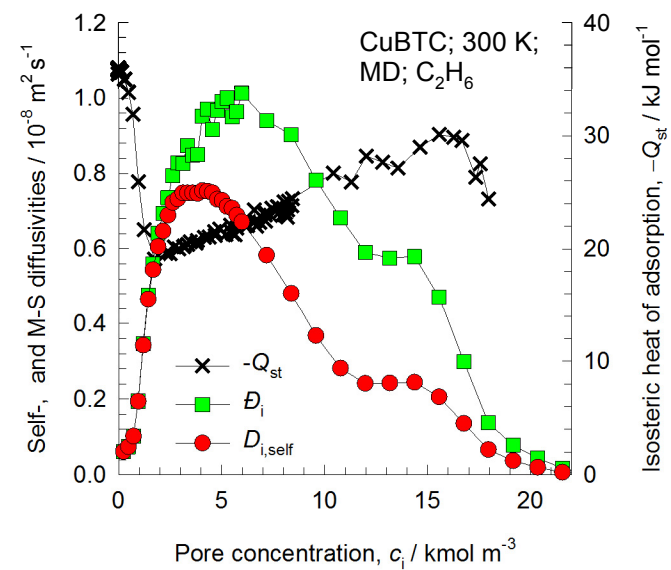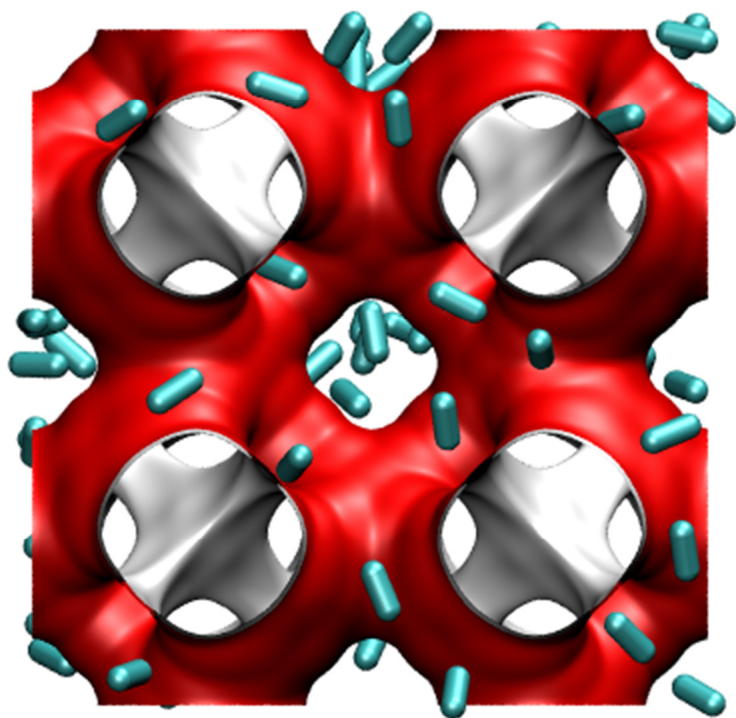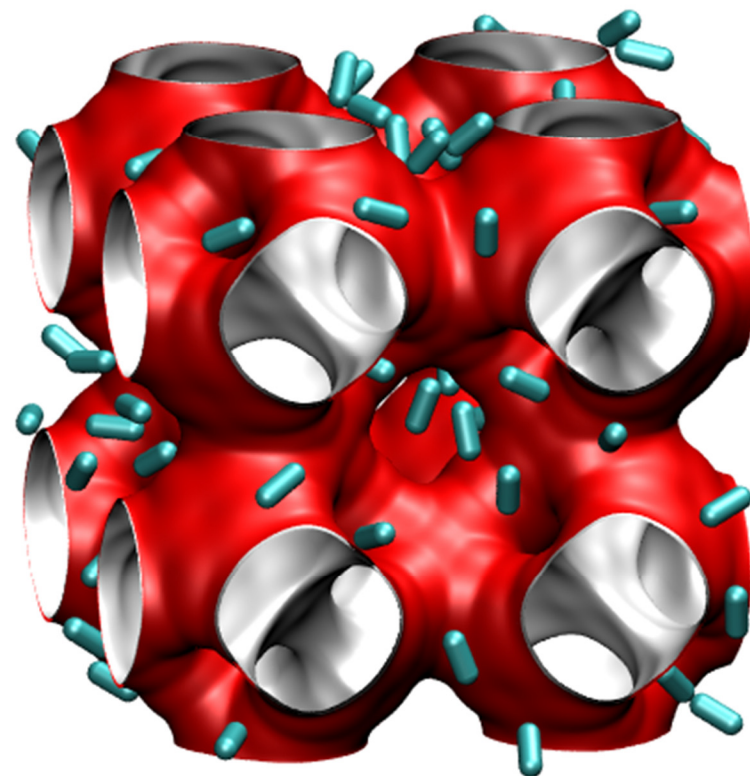

## Influence of $-Q_{st}$ on diffusivities

Location of  $C_3H_8$   
inside the tetrahedral  
pockets

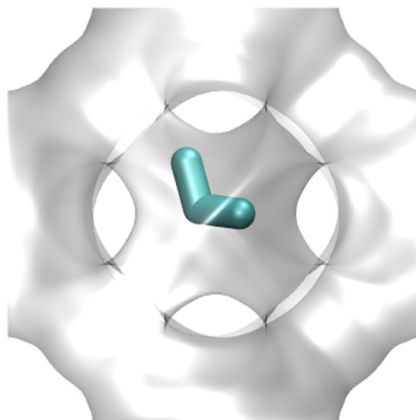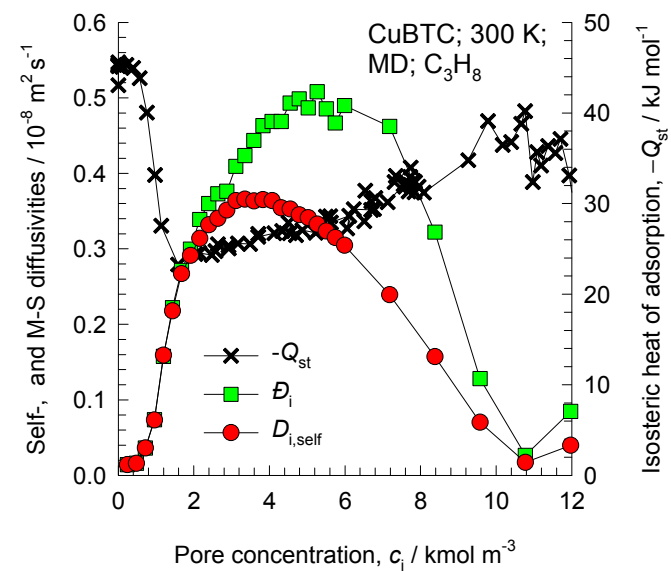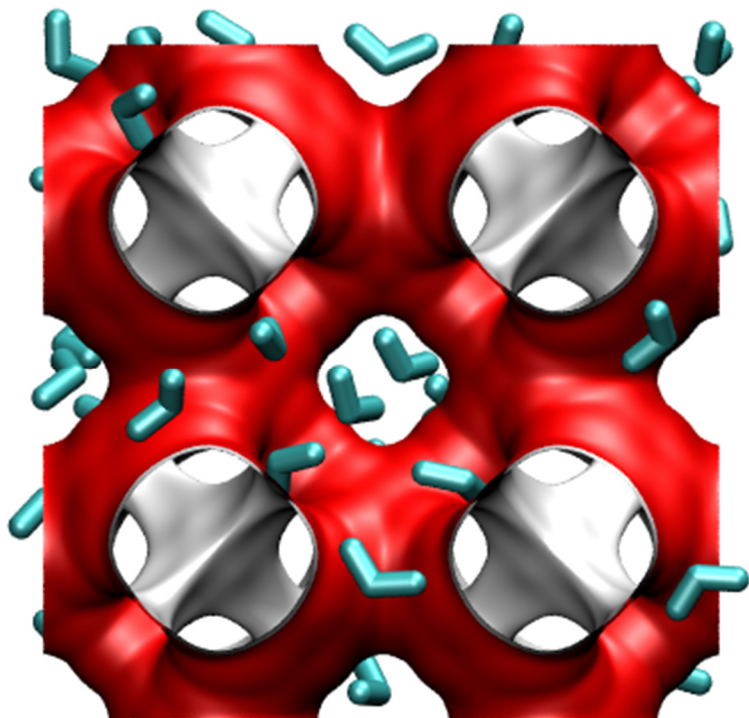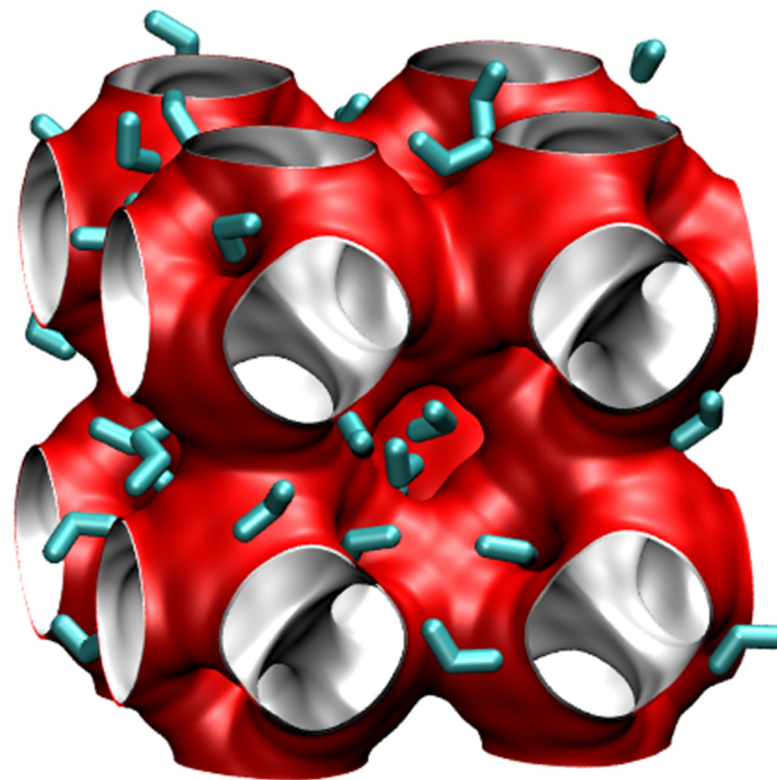

## Influence of $-Q_{st}$ on diffusivities

Location of  $nC_4H_{10}$   
inside the tetrahedral  
pockets

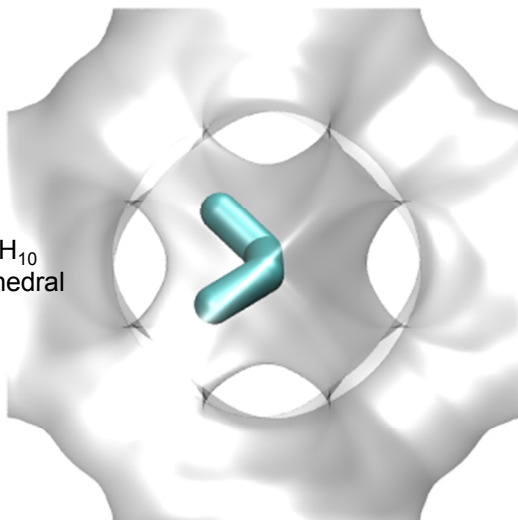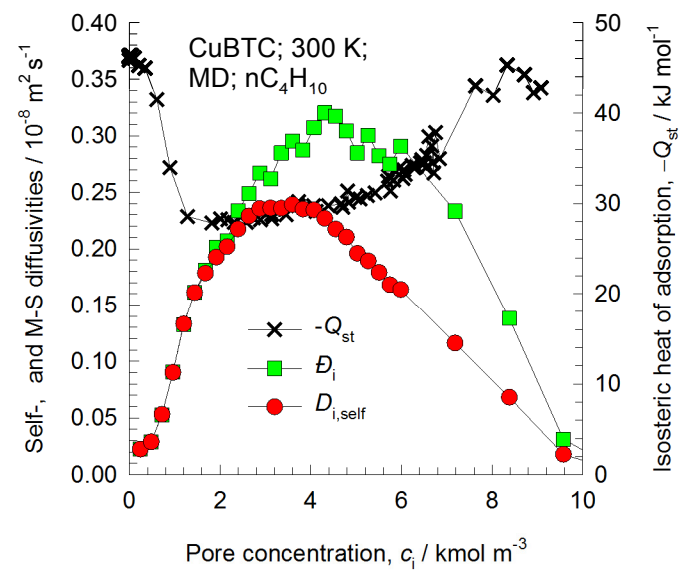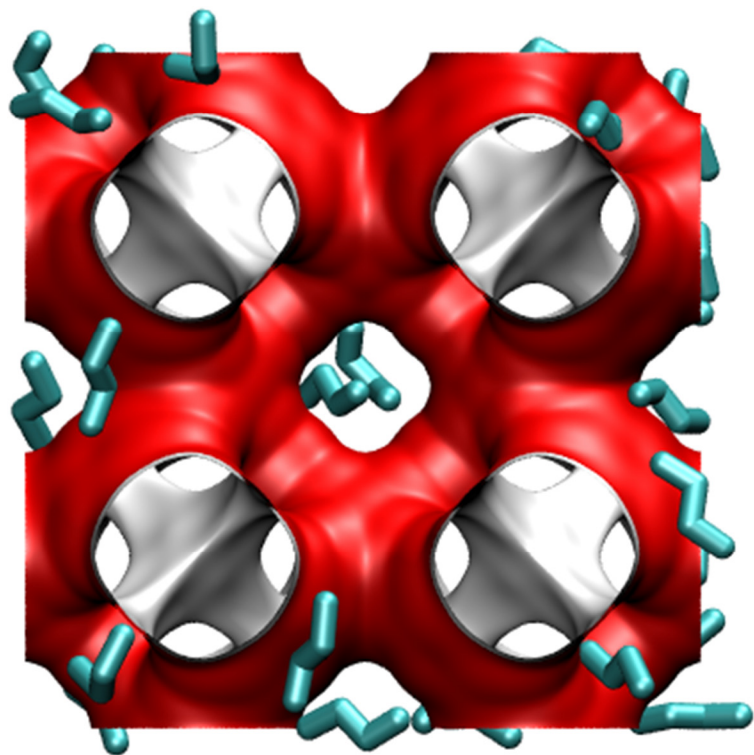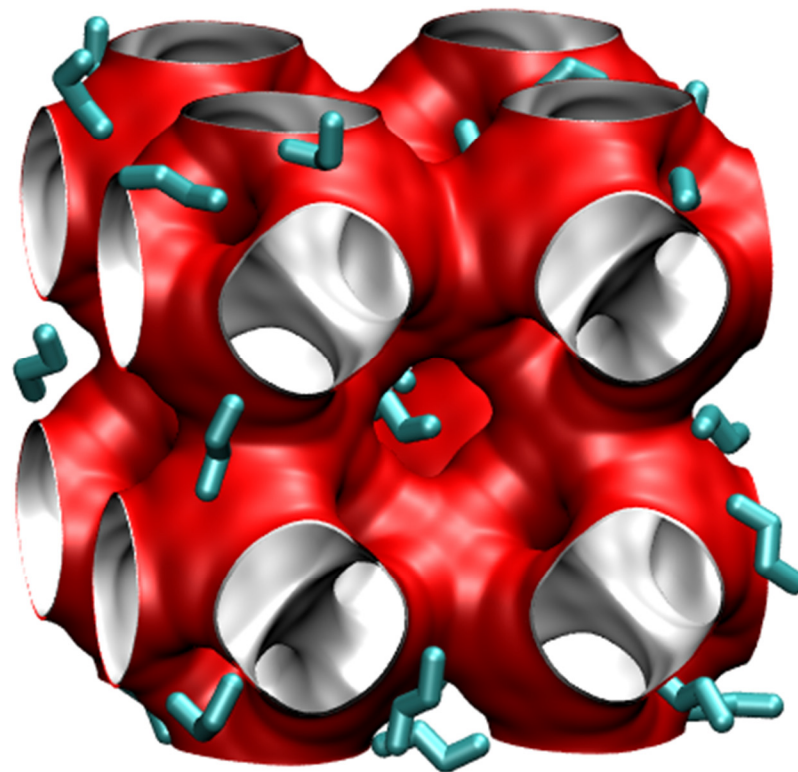

## Influence of $-Q_{st}$ on diffusivities

Location of  $iC_4H_{10}$   
inside the tetrahedral  
pockets

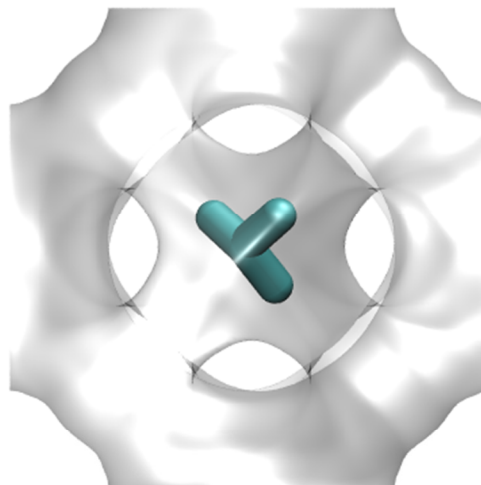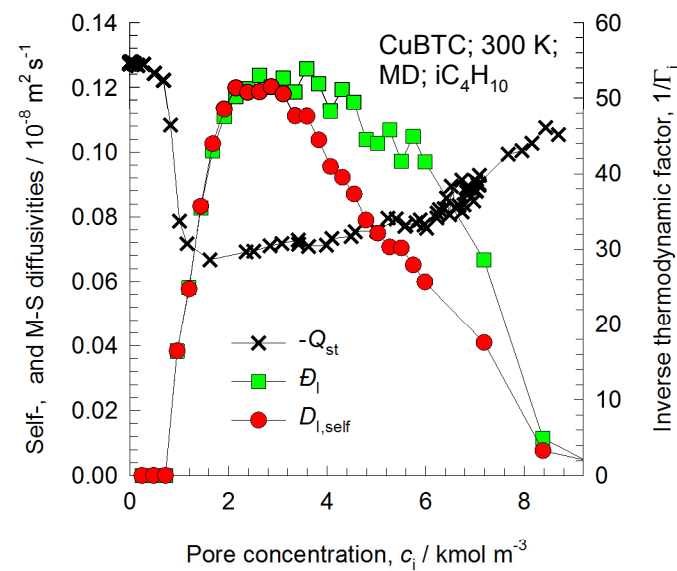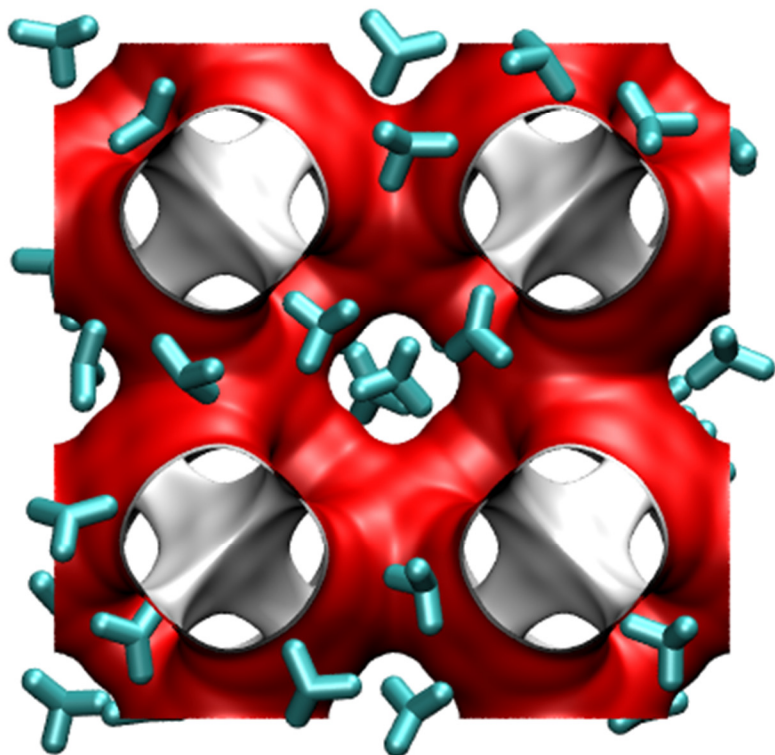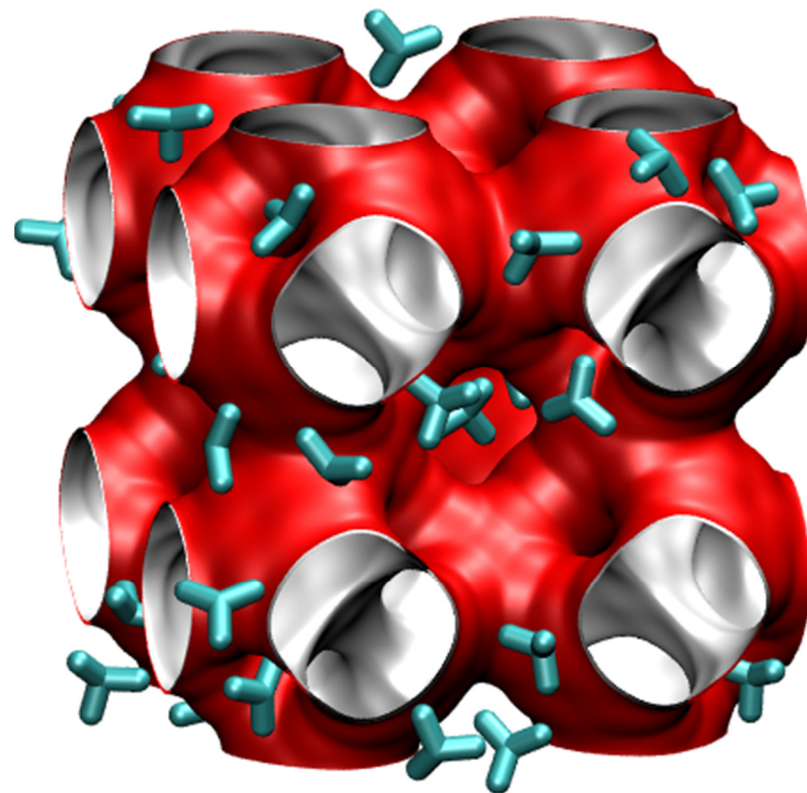

# CuBTC MD simulations of unary self-, and M-S diffusivities

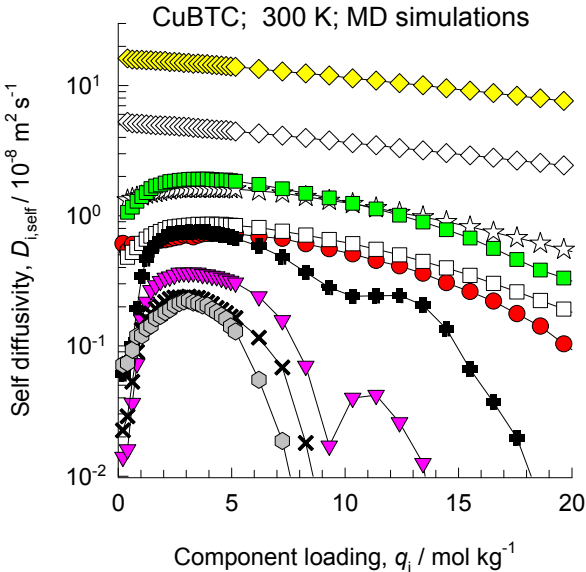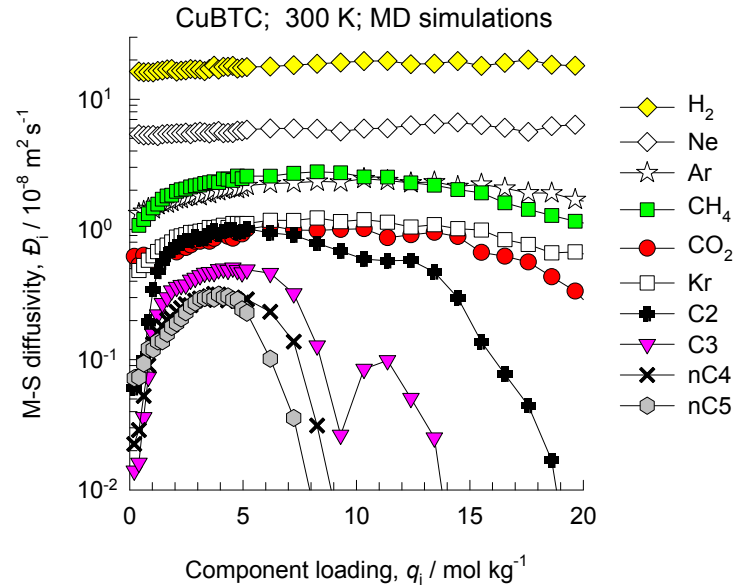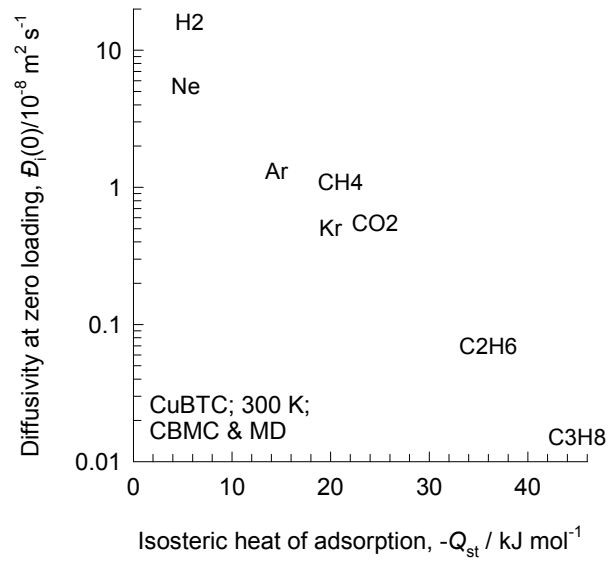

# IRMOF-1 pore landscape

For IRMOF-1 (= MOF 5 =  $\text{Zn}_4\text{O}(\text{BDC})_3$  with  $\text{BDC}^{2-}$  = 1-4 benzenedicarboxylate) the structural information was obtained from

D. Dubbeldam, K.S. Walton, D.E. Ellis, R.Q. Snurr, Exceptional Negative Thermal Expansion in Isoreticular Metal–Organic Frameworks, *Angew. Chem. Int. Ed.* 46 (2007) 4496-4499.

D. Dubbeldam, H. Frost, K.S. Walton, R.Q. Snurr, Molecular simulation of adsorption sites of light gases in the metal-organic framework IRMOF-1, *Fluid Phase Equilib.* 261 (2007) 152-161.

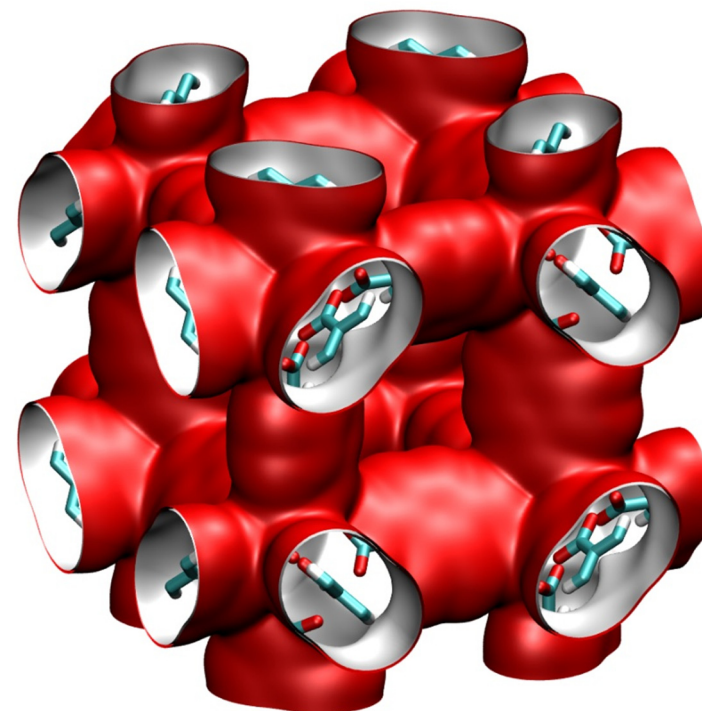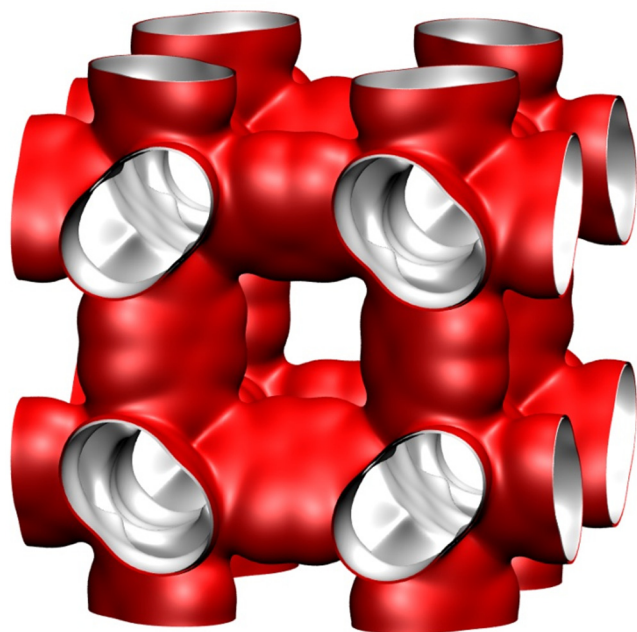

Snapshot of  $\text{CO}_2/\text{CH}_4$  mixture

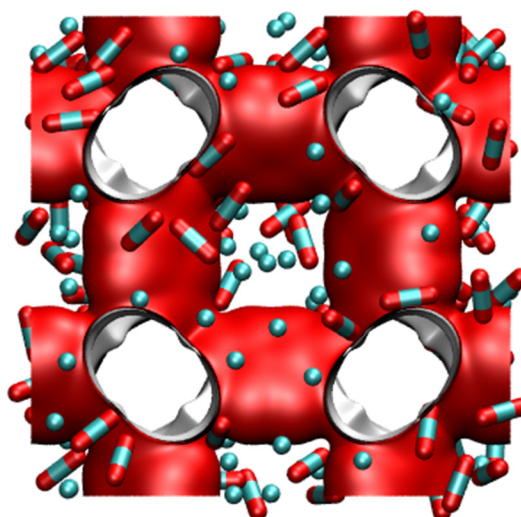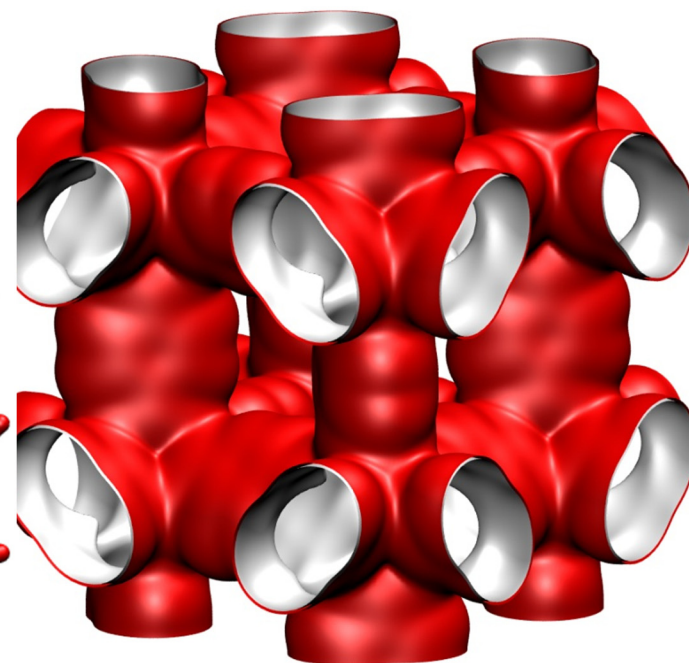

# IRMOF-1 pore dimensions

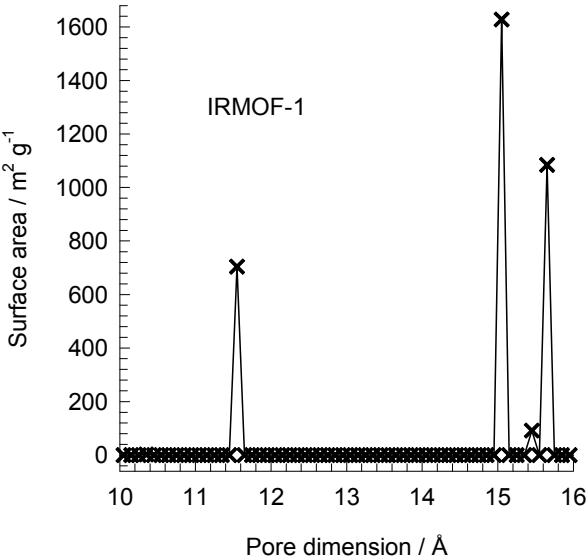

This plot of surface area versus pore dimension is determined using a combination of the DeLaunay triangulation method for pore dimension determination, and the procedure of Dören for determination of the surface area.

|                                                            | IRMOF-1  |
|------------------------------------------------------------|----------|
| <i>a</i> /Å                                                | 25.832   |
| <i>b</i> /Å                                                | 25.832   |
| <i>c</i> /Å                                                | 25.832   |
| Cell volume / Å³                                           | 17237.49 |
| conversion factor for [molec/uc] to [mol per kg Framework] | 0.1624   |
| conversion factor for [molec/uc] to [kmol/m³]              | 0.1186   |
| $\rho$ [kg/m3]                                             | 593.2075 |
| MW unit cell [g/mol(framework)]                            | 6157.788 |
| $\phi$ , fractional pore volume                            | 0.812    |
| open space / Å³/uc                                         | 13996.3  |
| Pore volume / cm³/g                                        | 1.369    |
| Surface area /m²/g                                         | 3522.2   |
| DeLaunay diameter /Å                                       | 7.38     |

Two alternating, inter-connected, cavities of 11 Å and 15 Å with window size of 8 Å.

# IRMOF-1 CBMC simulations of isotherms, and isosteric heats of adsorption

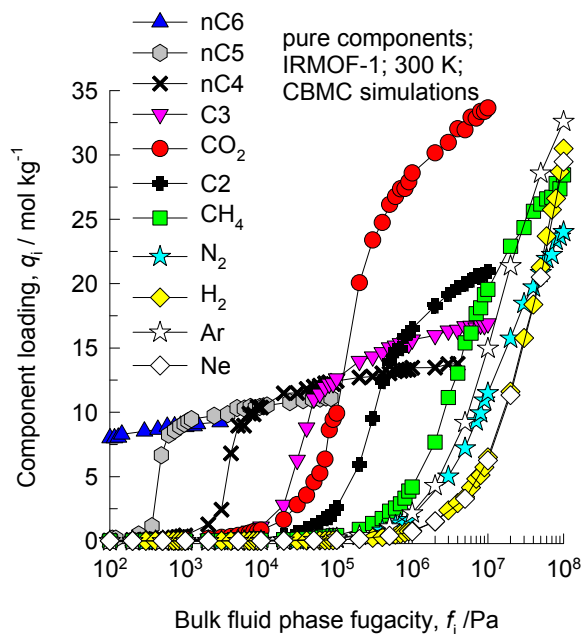

Note that C2 and C3 refer to saturated alkanes

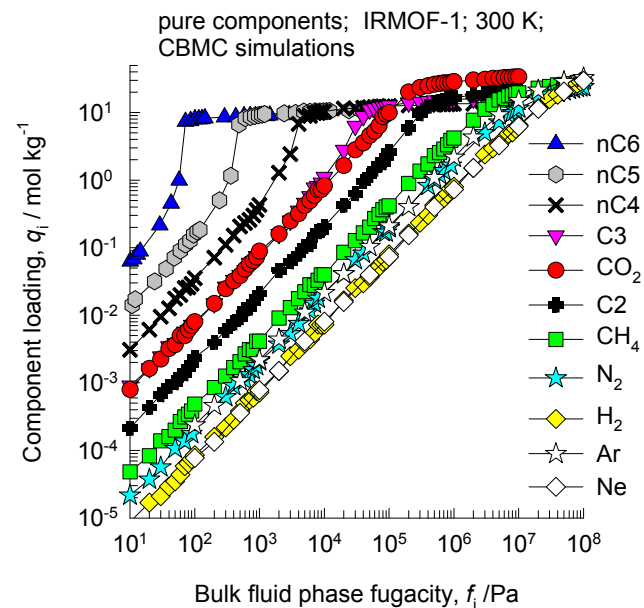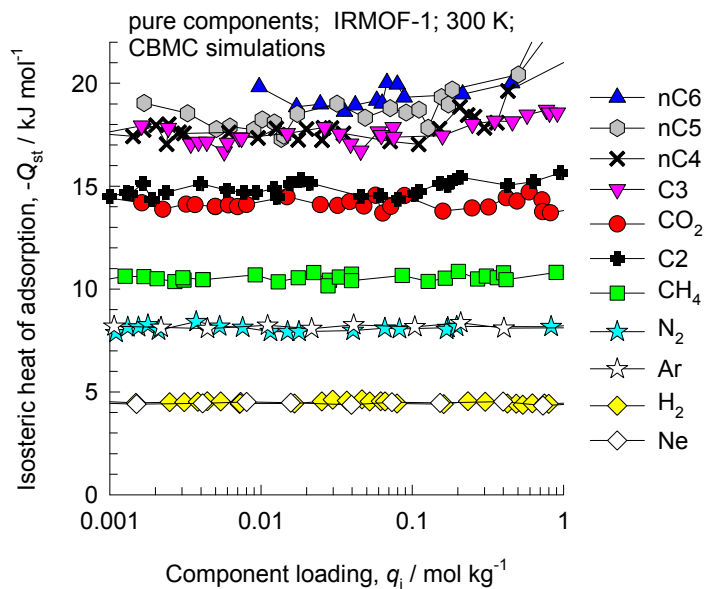

# IRMOF-1 CO<sub>2</sub> adsorption and diffusion

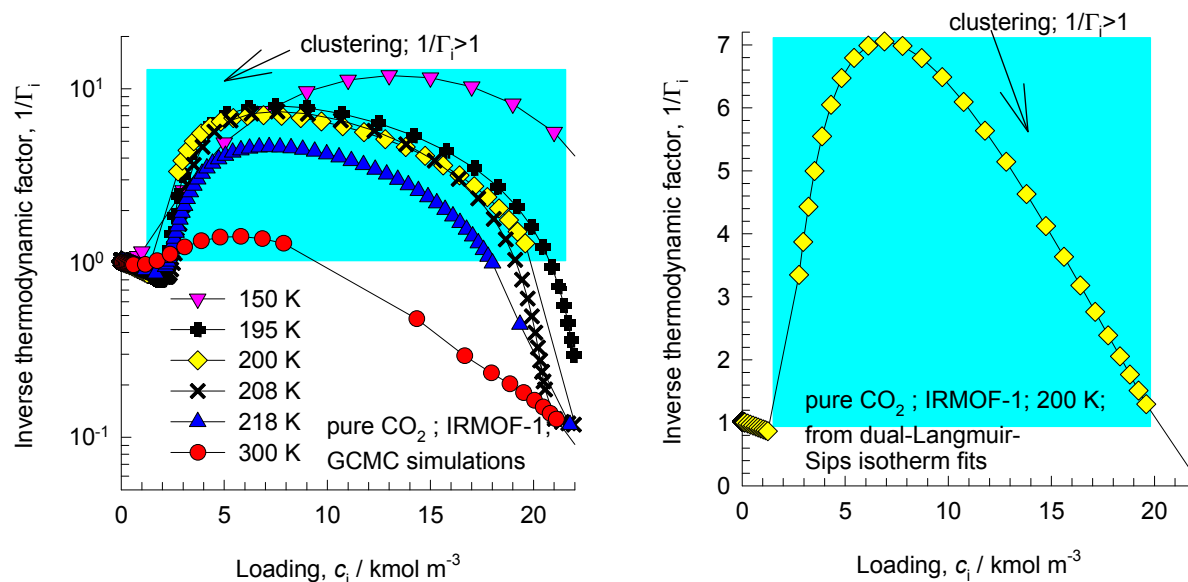

The RDFs show that the degree of clustering increases as the temperature is decreased.

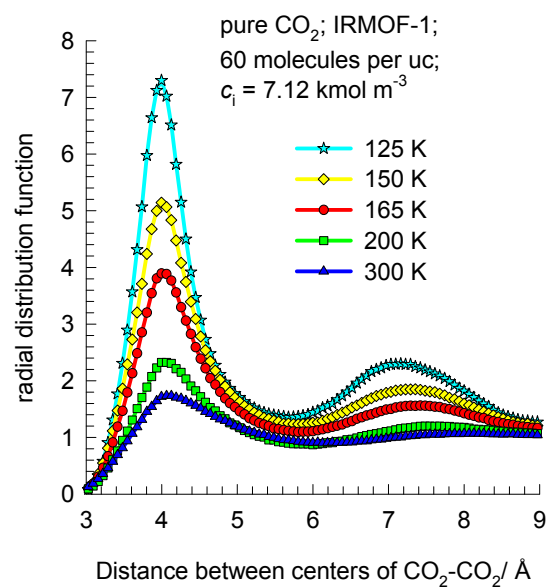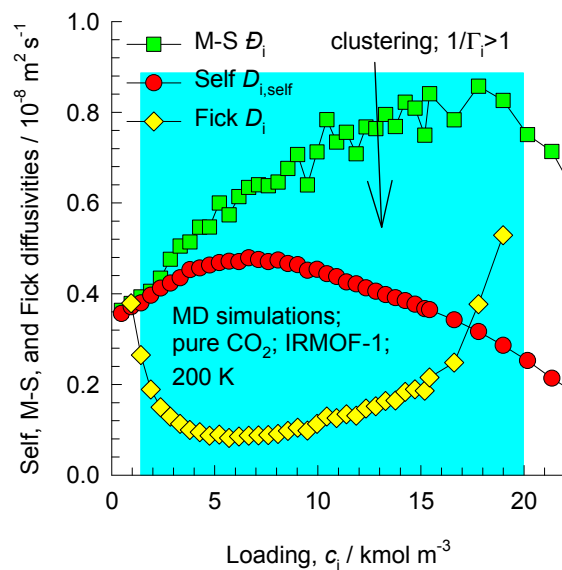

# IRMOF-1 CH<sub>4</sub> adsorption and diffusion

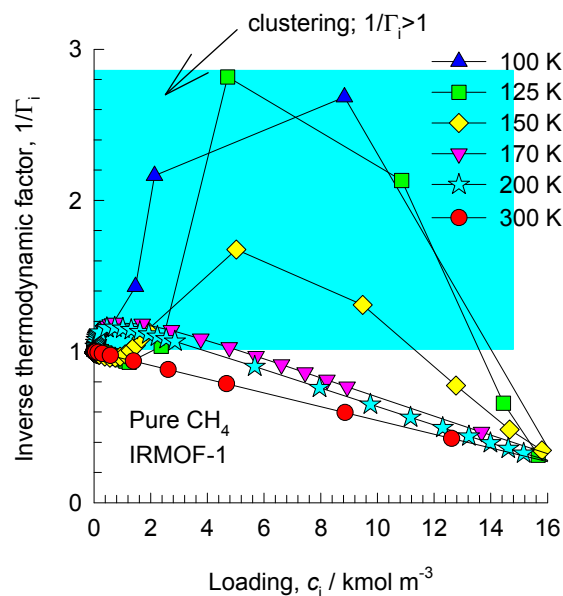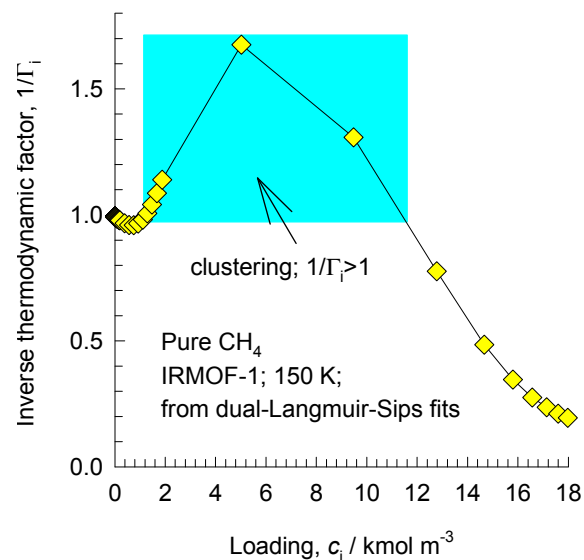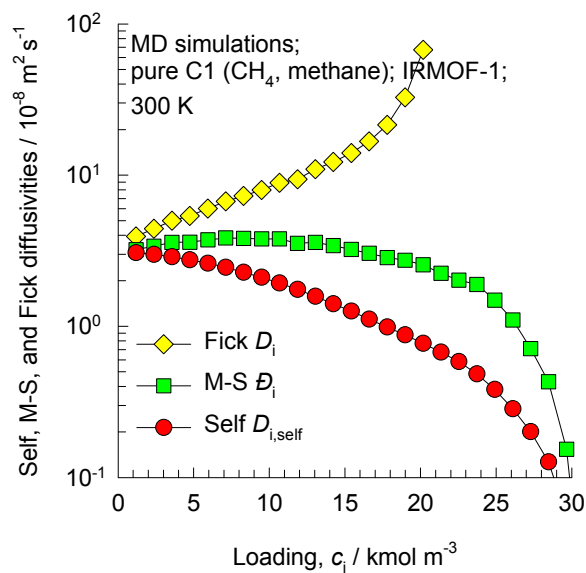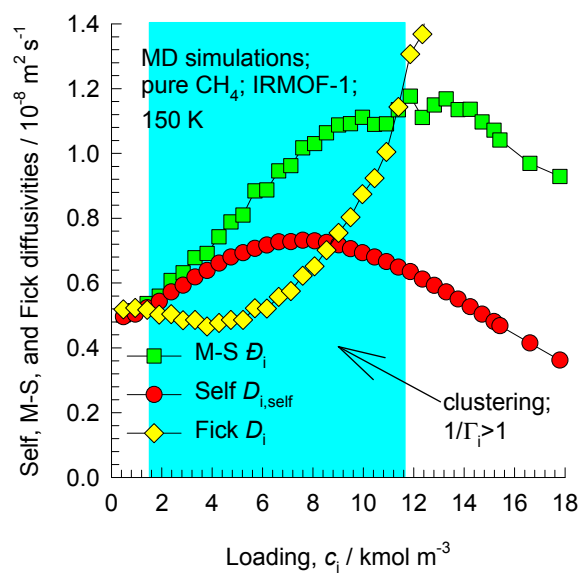

# IRMOF-1 Ar adsorption and diffusion

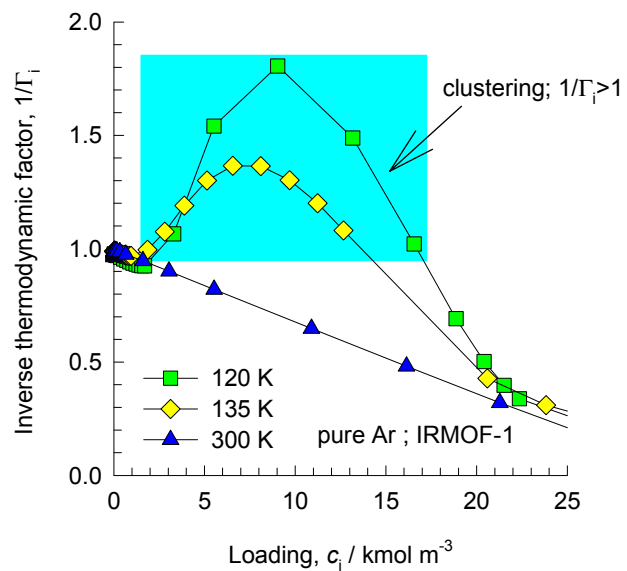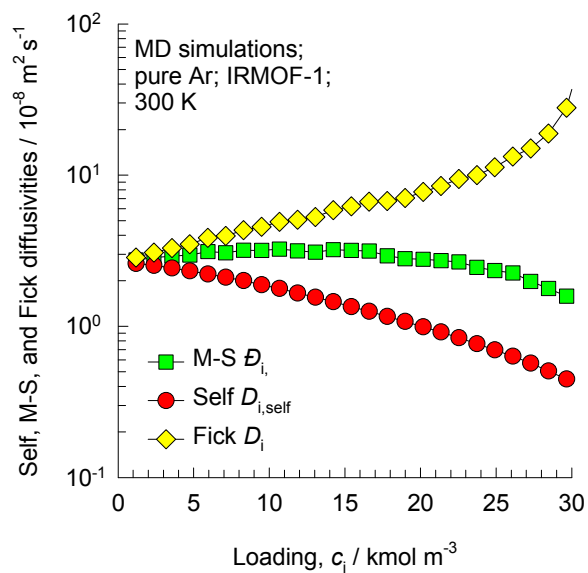

# IRMOF-1 CBMC simulations for linear alkanes

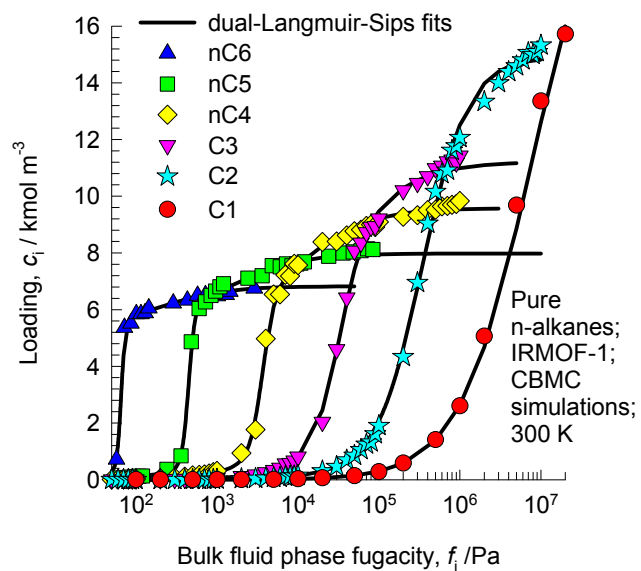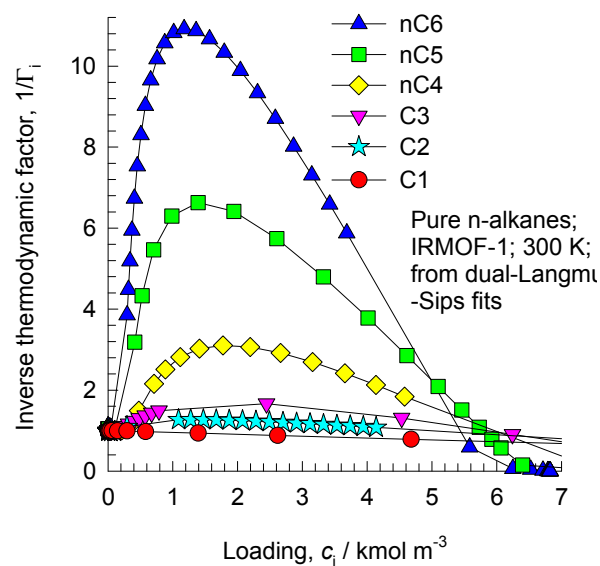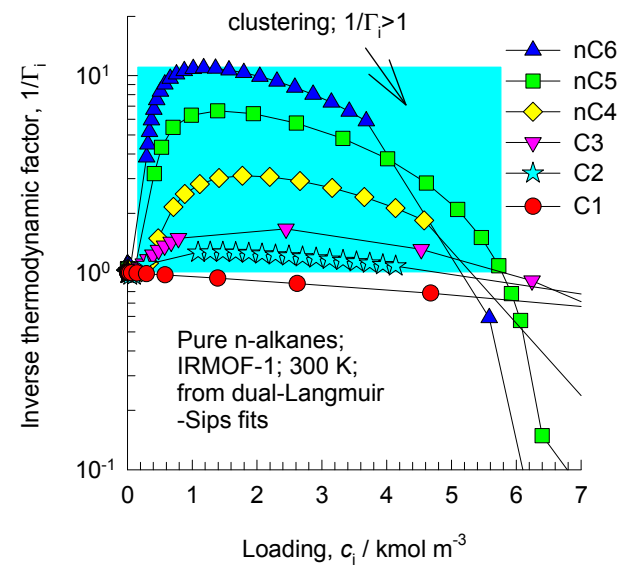

# IRMOF-1 CBMC simulations for pure C4 and C5 isomers

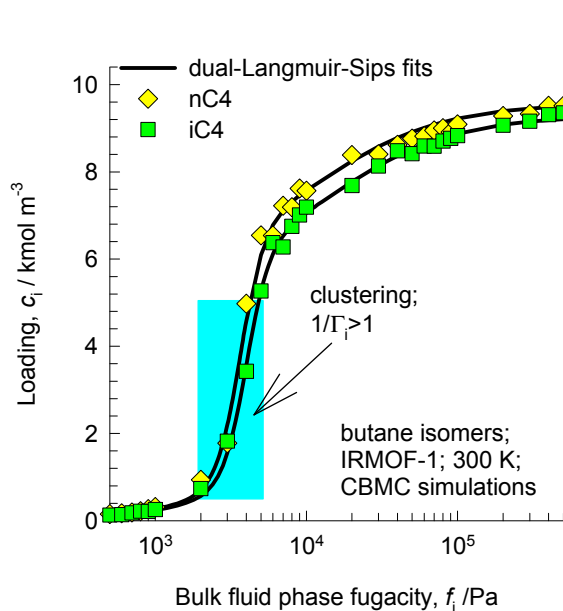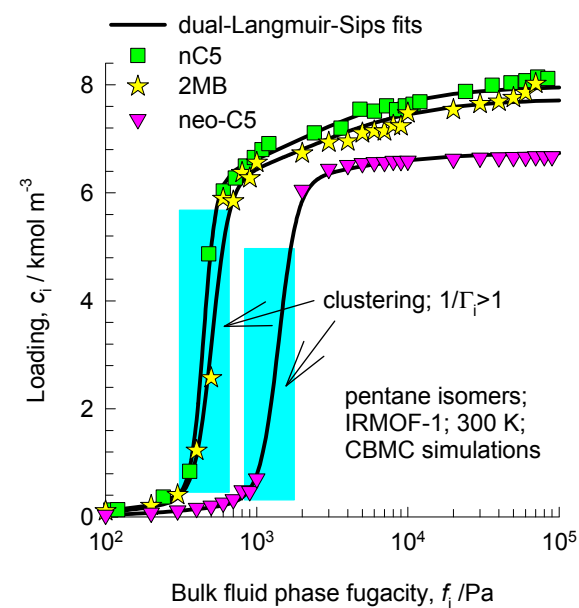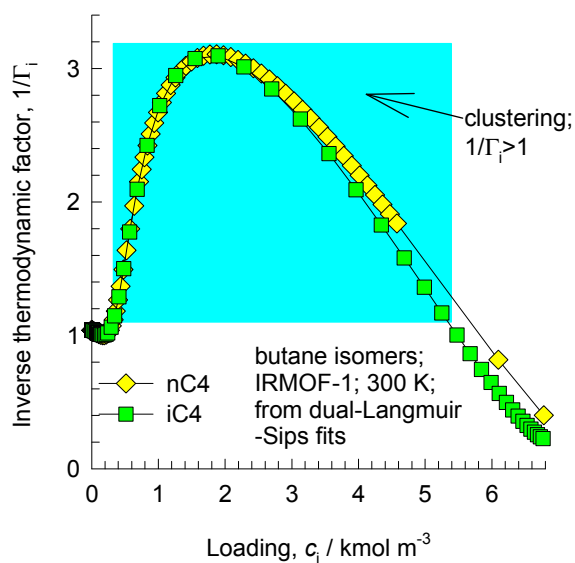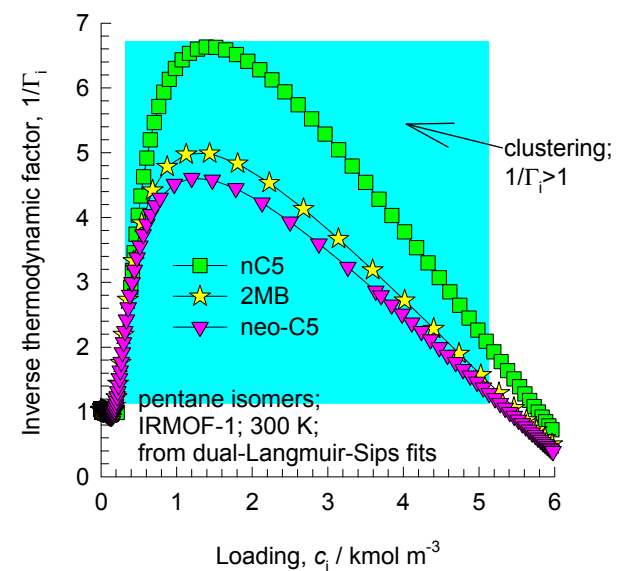

# IRMOF-1 RDFs for pure alkanes

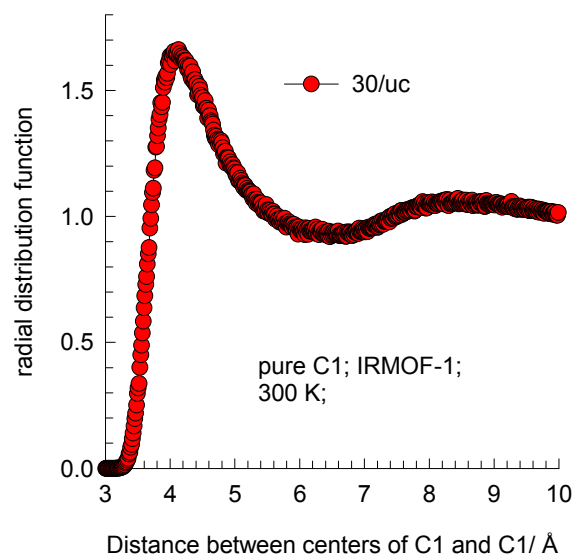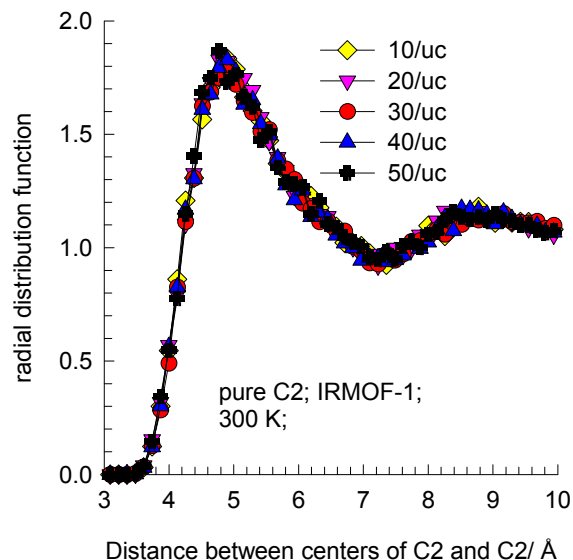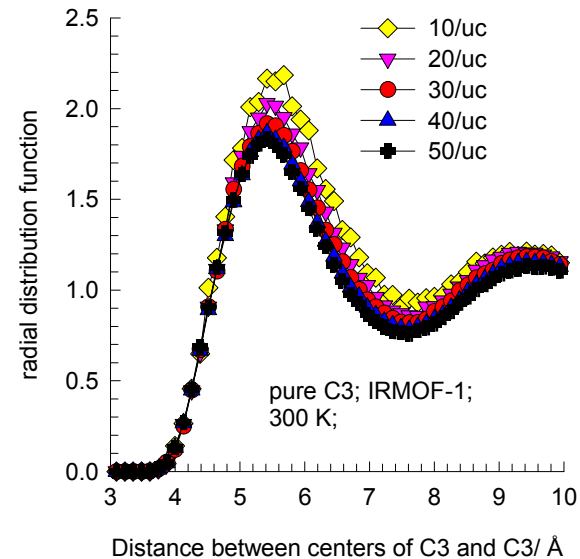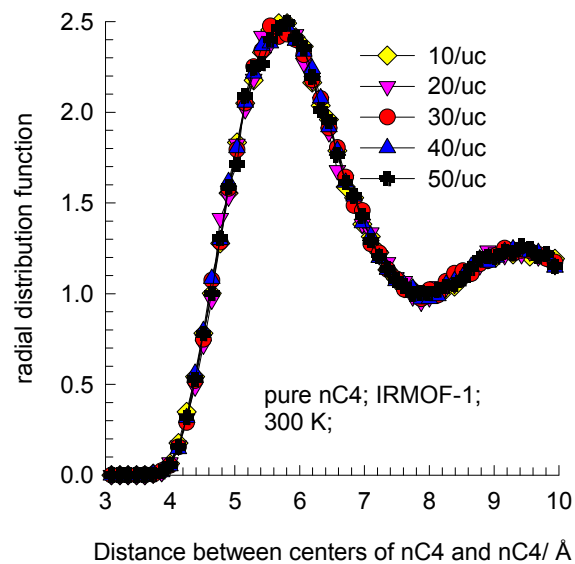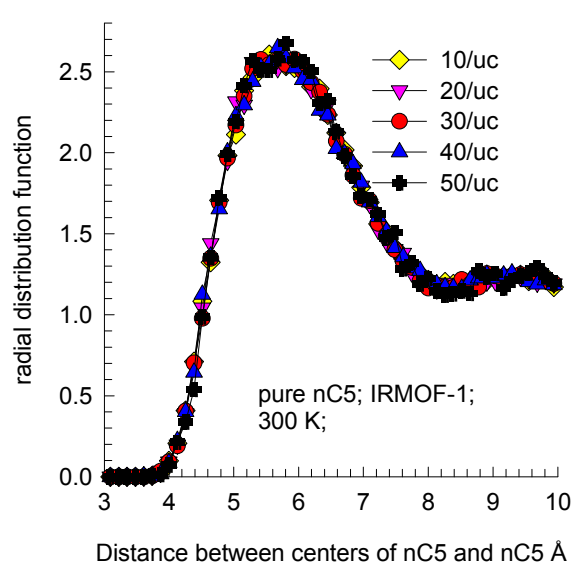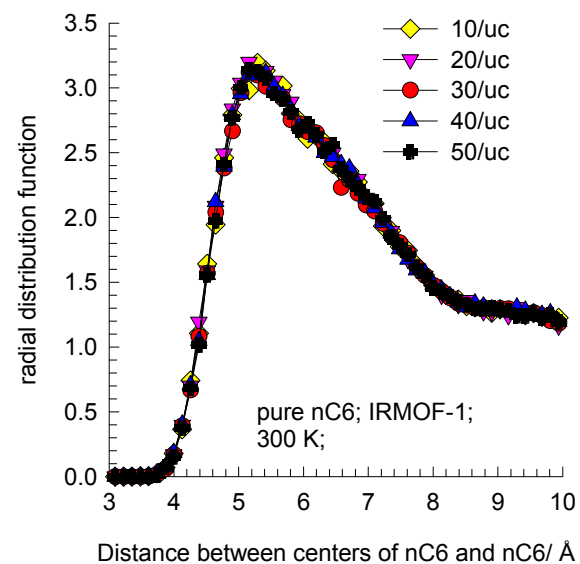

# IRMOF-1 Comparison of RDFs of n-alkanes

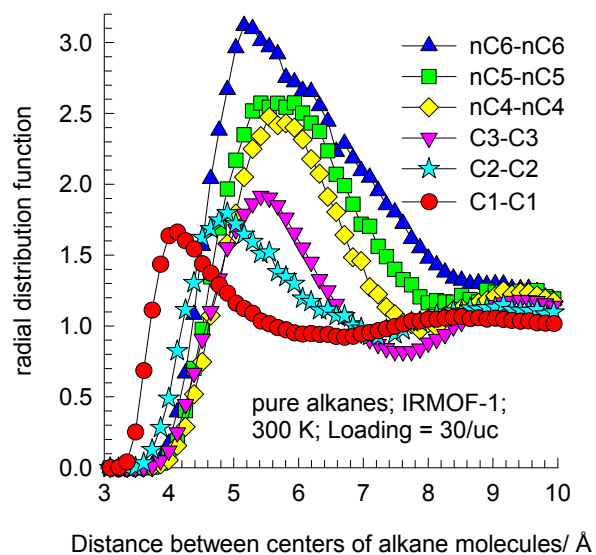

These RDFs are constructed on the basis of distances between centers of mass of n-alkane molecules

# IRMOF-1 RDF comparison of linear and branched alkanes

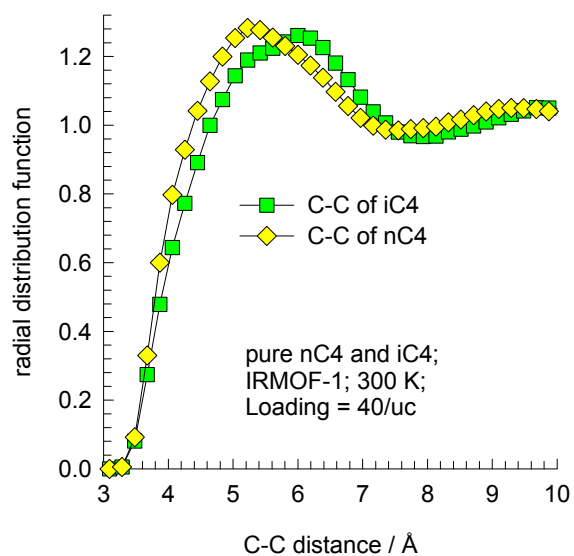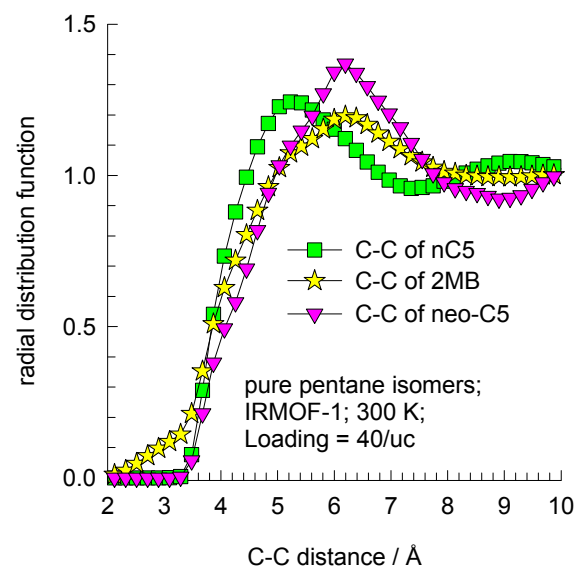

These RDFs are constructed  
on the basis of distances  
between every intermolecular  
C-C pairs

# MOF-177 pore landscape

The structural information for MOF-177 ( $= \text{Zn}_4\text{O}(\text{BTB})_2$  with  $(\text{BTB}^{3-} = 1,3,5\text{-benzenetribenzoate})$ ) is provided by

H.K. Chae, D.Y. Siberio-Pérez, J. Kim, Y.B. Go, M. Eddaoudi, A.J. Matzger, M. O'Keeffe, O.M. Yaghi, A route to high surface area, porosity and inclusion of large molecules in crystals, *Nature* 427 (2004) 523-527.

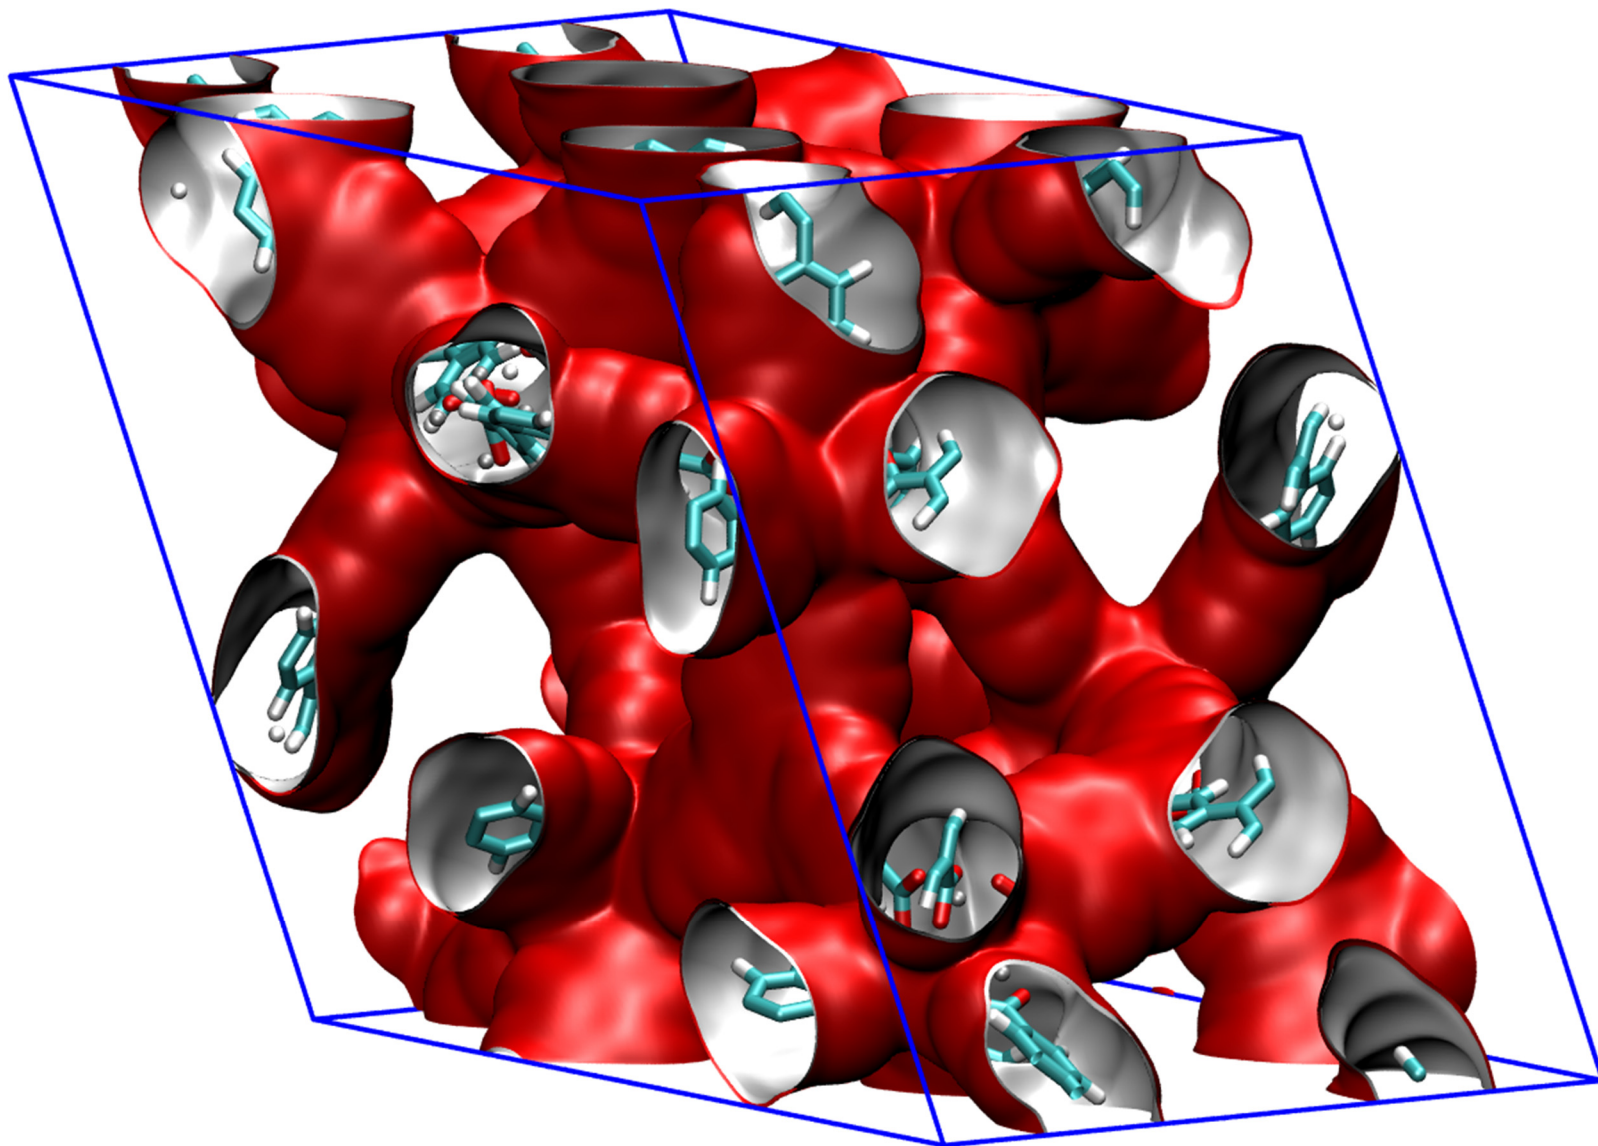

# MOF-177 pore dimensions

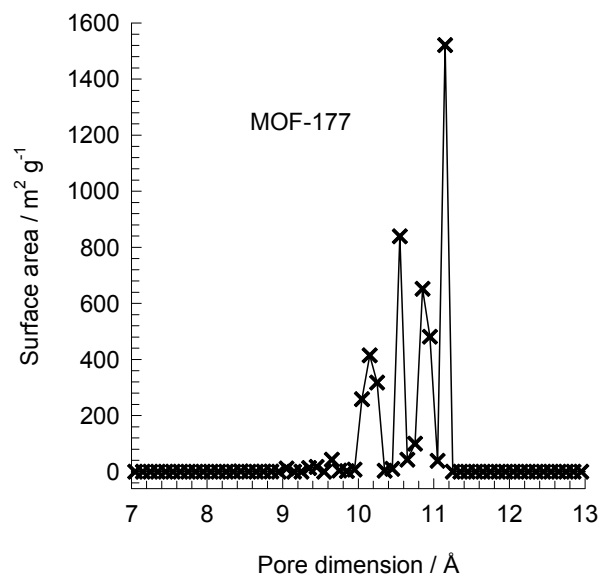

This plot of surface area versus pore dimension is determined using a combination of the DeLaunay triangulation method for pore dimension determination, and the procedure of Dürren for determination of the surface area.

|                                                            | MOF-177  |
|------------------------------------------------------------|----------|
| $a / \text{\AA}$                                           | 37.072   |
| $b / \text{\AA}$                                           | 37.072   |
| $c / \text{\AA}$                                           | 30.033   |
| Cell volume / $\text{\AA}^3$                               | 35745.5  |
| conversion factor for [molec/uc] to [mol per kg Framework] | 0.1089   |
| conversion factor for [molec/uc] to [kmol/m <sup>3</sup> ] | 0.0553   |
| $\rho$ [kg/m <sup>3</sup> ]                                | 426.5952 |
| MW unit cell [g/mol(framework)]                            | 9182.931 |
| $\phi$ , fractional pore volume                            | 0.840    |
| open space / $\text{\AA}^3/\text{uc}$                      | 30010.9  |
| Pore volume / cm <sup>3</sup> /g                           | 1.968    |
| Surface area / m <sup>2</sup> /g                           | 4781.0   |
| DeLaunay diameter / $\text{\AA}$                           | 10.1     |

Tetrahedral  $[\text{Zn}_4\text{O}]^{6+}$  units are linked by large, triangular tricarboxylate ligands. Six diamond-shaped channels (upper) with diameter of 10.8  $\text{\AA}$  surround a pore containing eclipsed BTB<sup>3-</sup> moieties.

# MOF-177 CBMC simulations of isotherms, and isosteric heats of adsorption

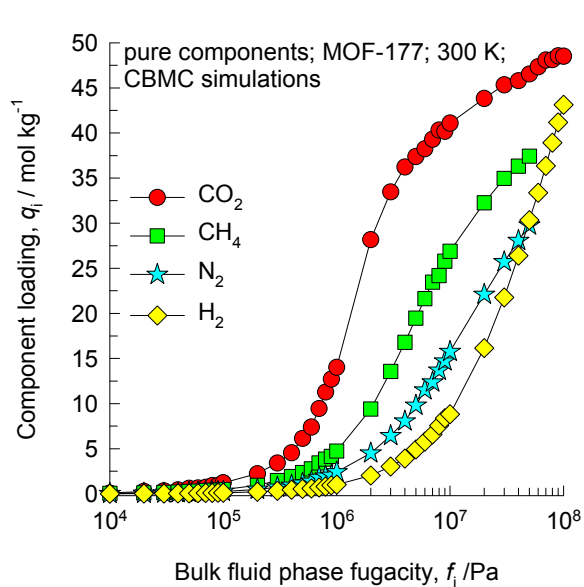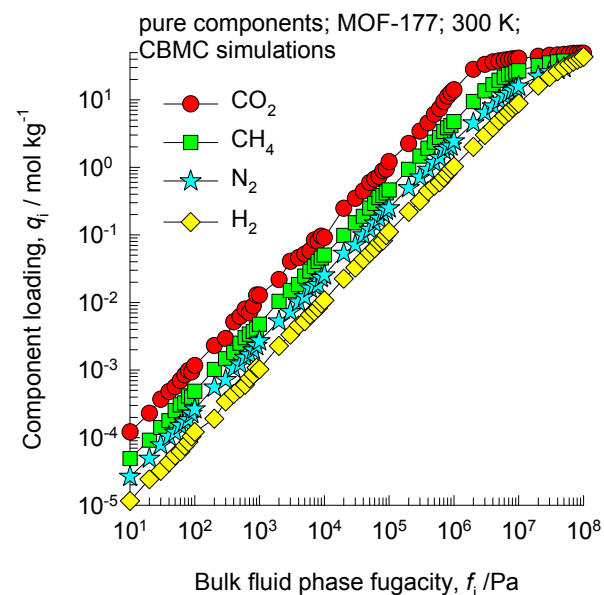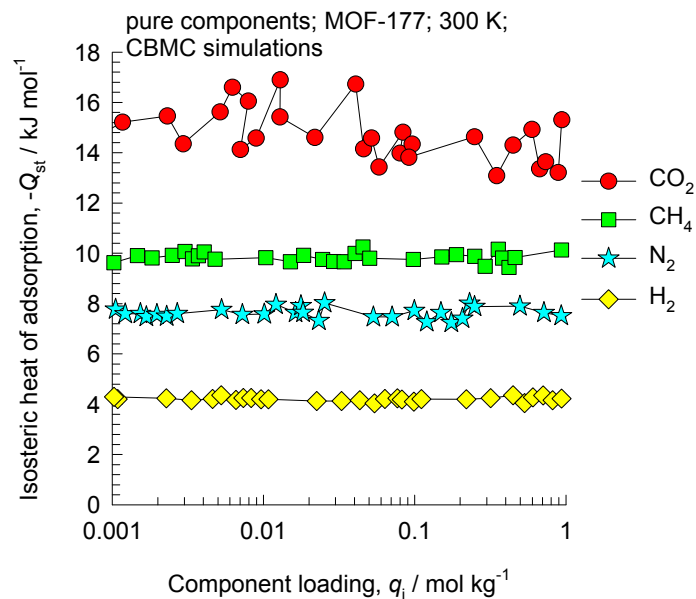

# MOF-177 MD simulations of unary self-, and M-S diffusivities

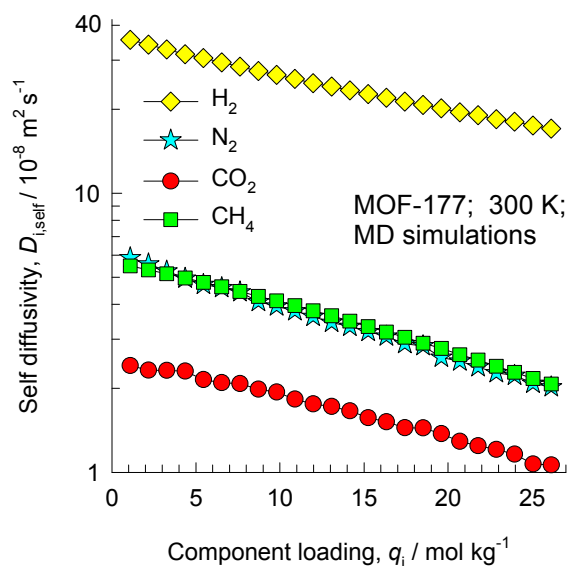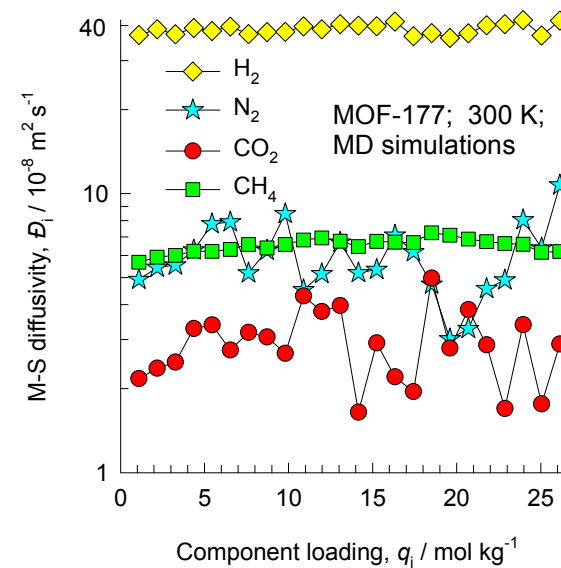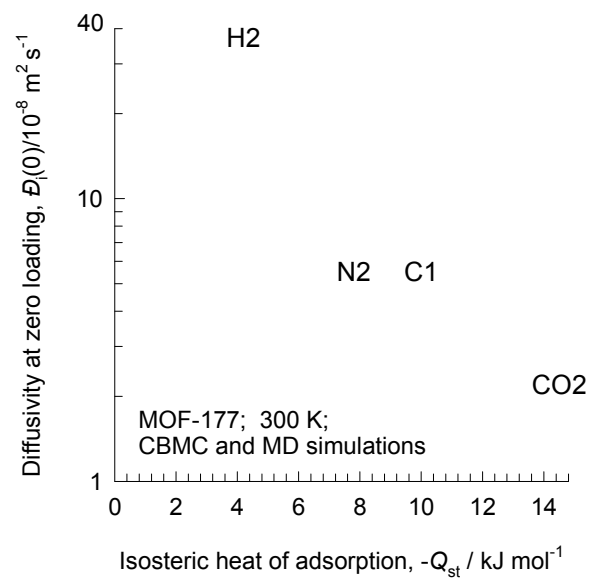

# Intersecting channels

# BEA pore landscape

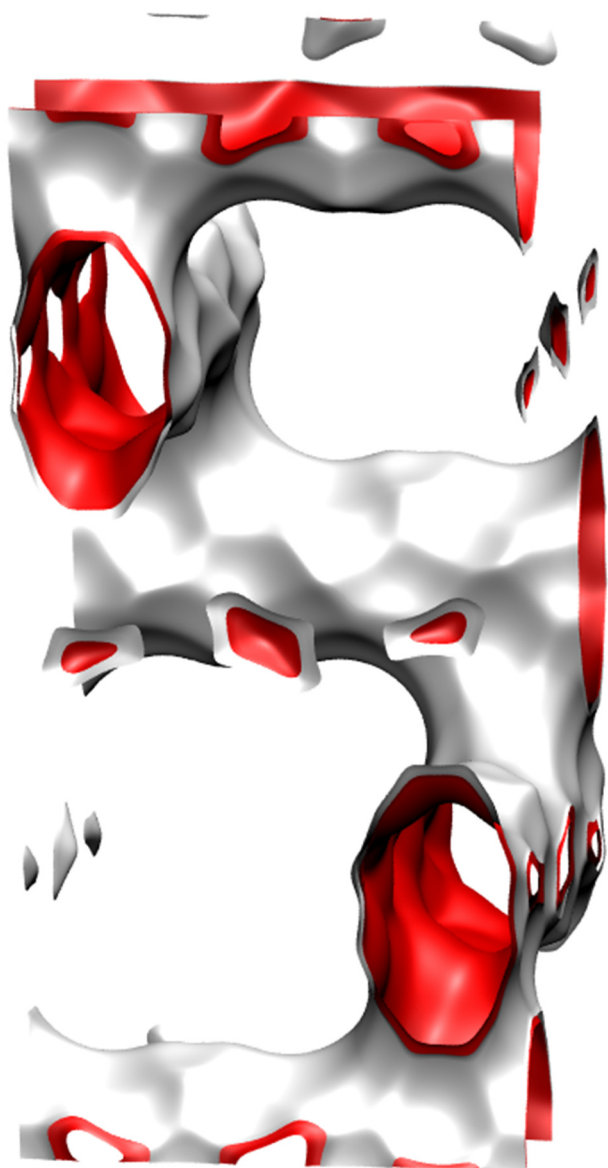

Intersecting channels of two sizes:  
12-ring and 10-ring

|                                                            | BEA      |
|------------------------------------------------------------|----------|
| $a / \text{\AA}$                                           | 12.661   |
| $b / \text{\AA}$                                           | 12.661   |
| $c / \text{\AA}$                                           | 26.406   |
| Cell volume / $\text{\AA}^3$                               | 4232.906 |
| conversion factor for [molec/uc] to [mol per kg Framework] | 0.2600   |
| conversion factor for [molec/uc] to [kmol/m <sup>3</sup> ] | 0.9609   |
| $\rho$ [kg/m <sup>3</sup> ]                                | 1508.558 |
| MW unit cell [g/mol(framework)]                            | 3845.427 |
| $\phi$ , fractional pore volume                            | 0.408    |
| open space / $\text{\AA}^3/\text{uc}$                      | 1728.1   |
| Pore volume / cm <sup>3</sup> /g                           | 0.271    |
| Surface area / m <sup>2</sup> /g                           | 923.0    |
| DeLaunay diameter / $\text{\AA}$                           | 5.87     |

Structural information from: C. Baerlocher, L.B. McCusker, Database of Zeolite Structures, International Zeolite Association, <http://www.iza-structure.org/databases/>

# BEA pore dimensions

This plot of surface area versus pore dimension is determined using a combination of the DeLaunay triangulation method for pore dimension determination, and the procedure of Dürren for determination of the surface area.

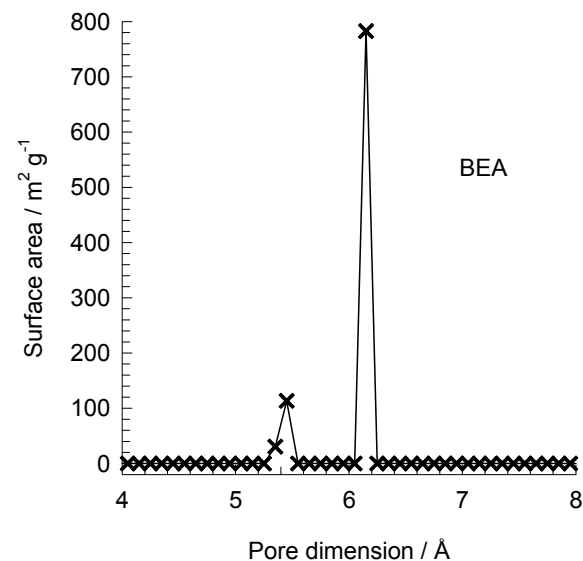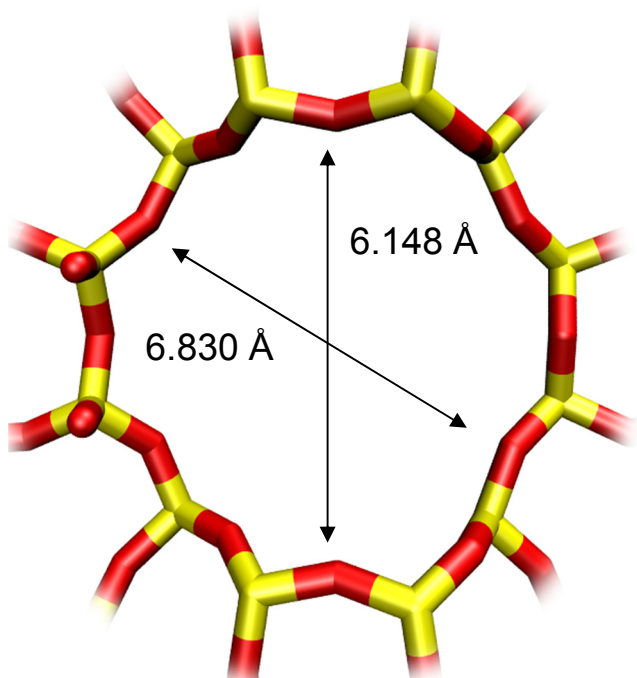

BEA [1 0 0]

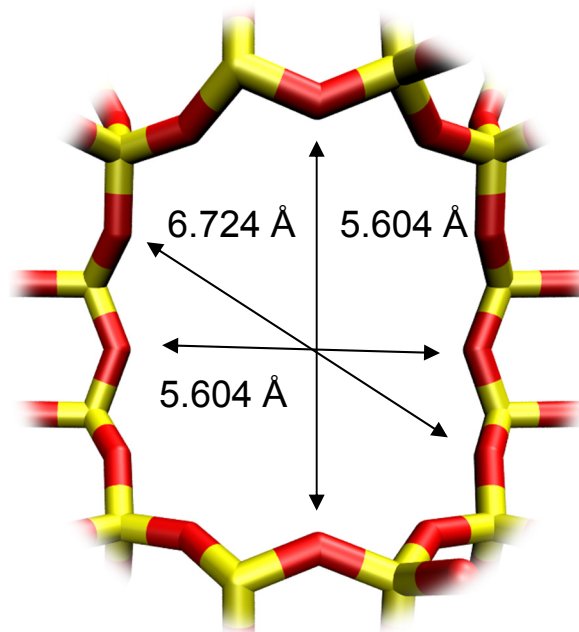

BEA [0 0 1]

## Influence of Inverse Thermodynamic Factor on diffusivities

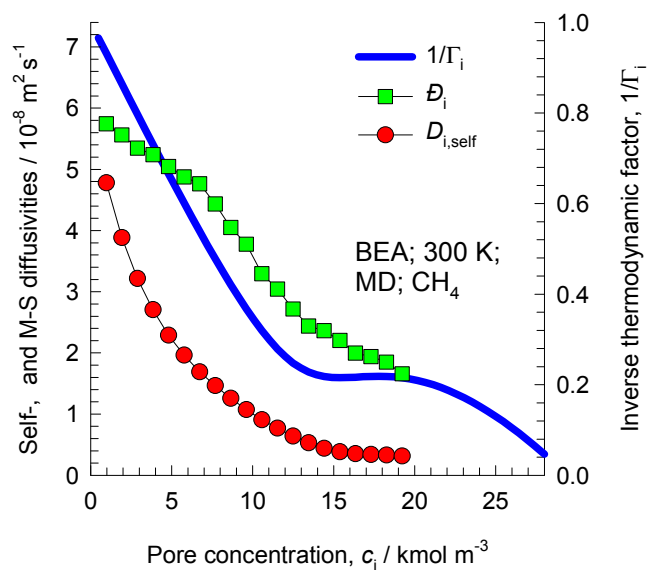

A detailed analysis of the loading dependence of  $\text{CH}_4$  in BEA is contained in

E. Beerdsen, D. Dubbeldam and B. Smit, J Phys Chem B, 2006, 110, 22754-22772.

E. Beerdsen, D. Dubbeldam and B. Smit, Phys. Rev. Lett., 2006, 96, 044501.

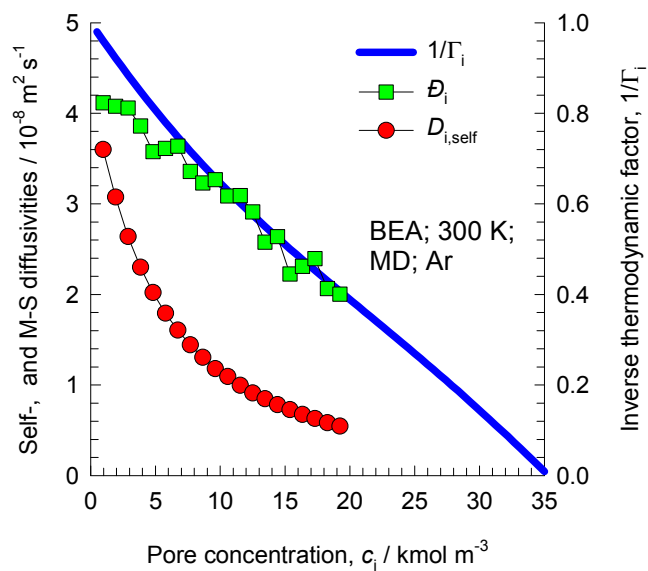

# BOG pore landscape

Intersecting channels:  
12-ring and 10-ring

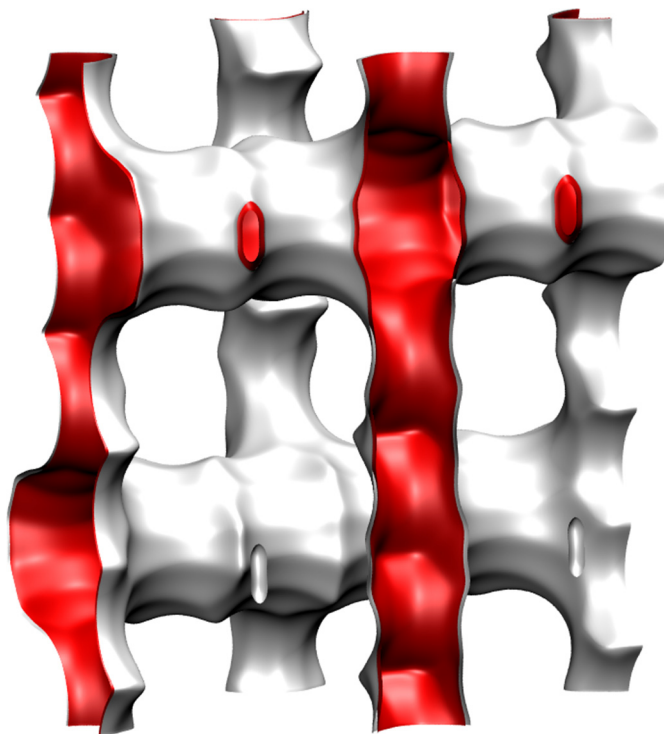

|                                                            | BOG      |
|------------------------------------------------------------|----------|
| $a / \text{\AA}$                                           | 20.236   |
| $b / \text{\AA}$                                           | 23.798   |
| $c / \text{\AA}$                                           | 12.798   |
| Cell volume / $\text{\AA}^3$                               | 6163.214 |
| conversion factor for [molec/uc] to [mol per kg Framework] | 0.1734   |
| conversion factor for [molec/uc] to [kmol/m <sup>3</sup> ] | 0.7203   |
| $\rho$ [kg/m <sup>3</sup> ]                                | 1995.523 |
| MW unit cell [g/mol(framework)]                            | 5768.141 |
| $\phi$ , fractional pore volume                            | 0.374    |
| open space / $\text{\AA}^3/\text{uc}$                      | 2305.4   |
| Pore volume / cm <sup>3</sup> /g                           | 0.241    |
| Surface area / m <sup>2</sup> /g                           | 758.0    |
| DeLaunay diameter / $\text{\AA}$                           | 5.02     |

Structural information from: C. Baerlocher, L.B. McCusker, Database of Zeolite Structures, International Zeolite Association, <http://www.iza-structure.org/databases/>

# BOG pore dimensions

This plot of surface area versus pore dimension is determined using a combination of the DeLaunay triangulation method for pore dimension determination, and the procedure of Dürren for determination of the surface area.

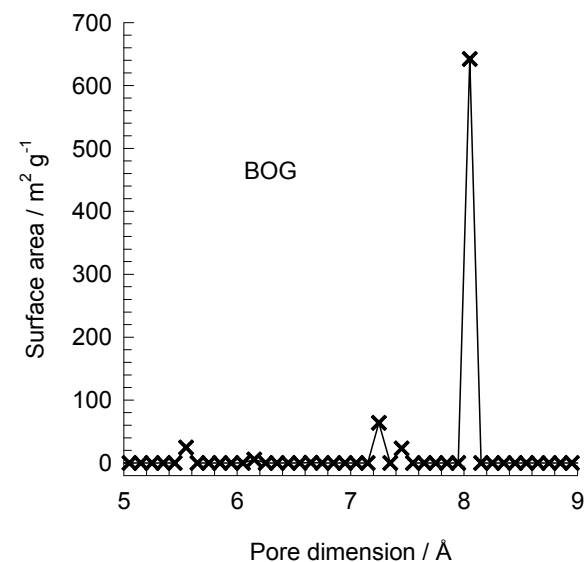

BOG has an intersecting channel system:  
12-ring channels intersecting with 10-ring channels

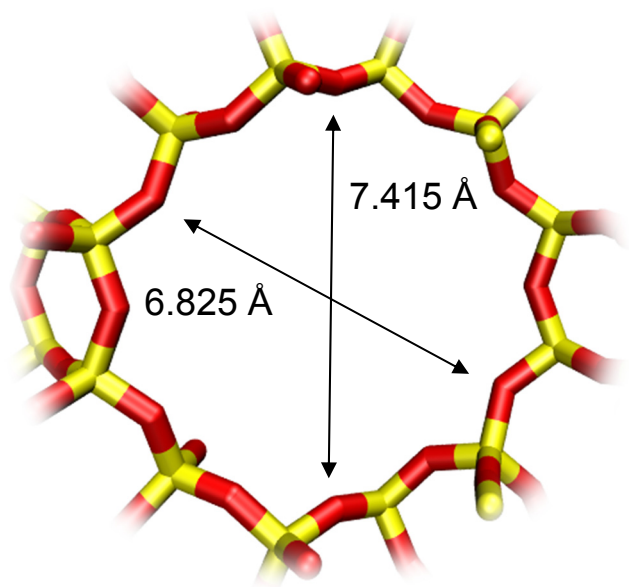

BOG [1 0 0]

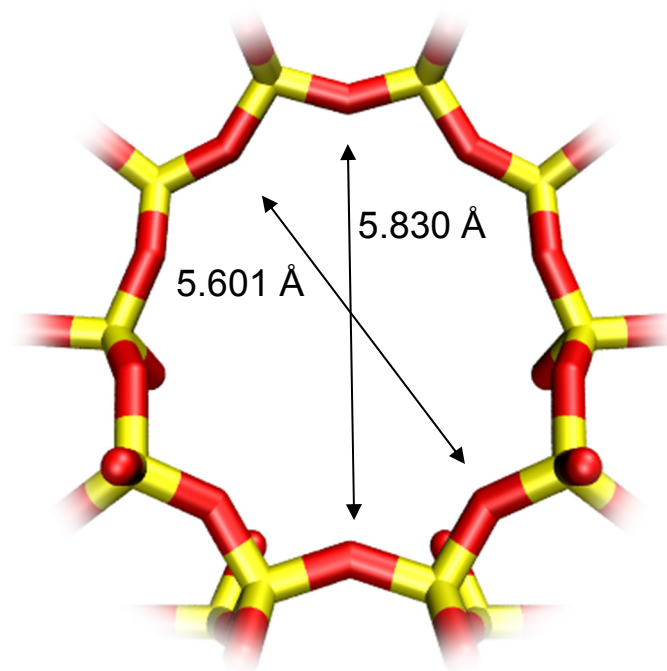

BOG [0 1 0]

## Loading dependence of diffusivities

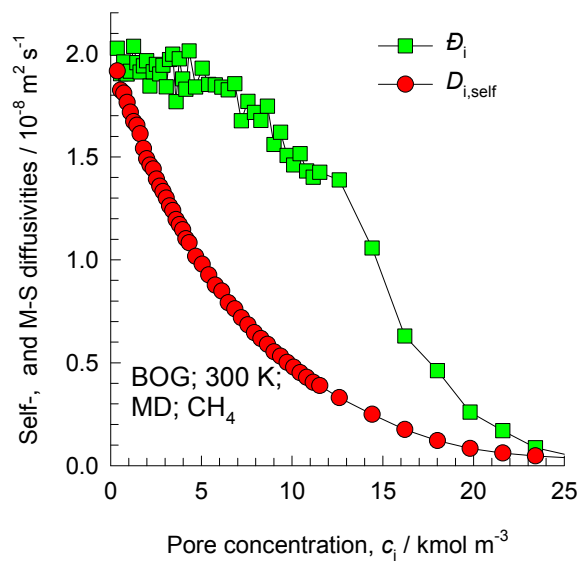

A detailed analysis of the loading dependence of  $\text{CH}_4$  in BOG is contained in

E. Beerdse, D. Dubbeldam and B. Smit, J Phys Chem B, 2006, 110, 22754-22772.

E. Beerdse, D. Dubbeldam and B. Smit, Phys. Rev. Lett., 2006, 96, 044501.

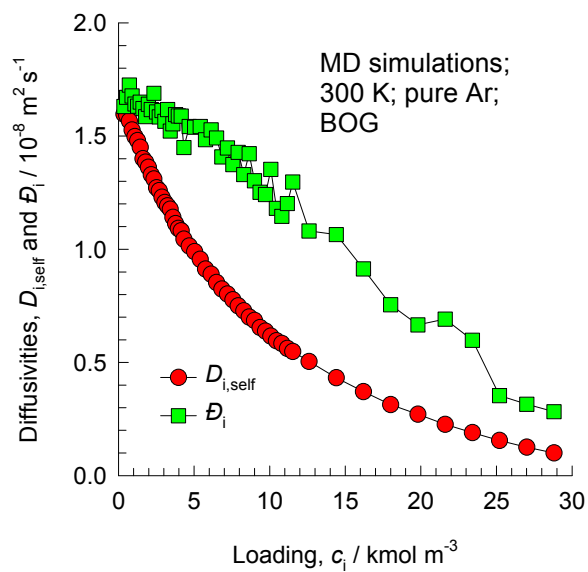

# FER pore landscape

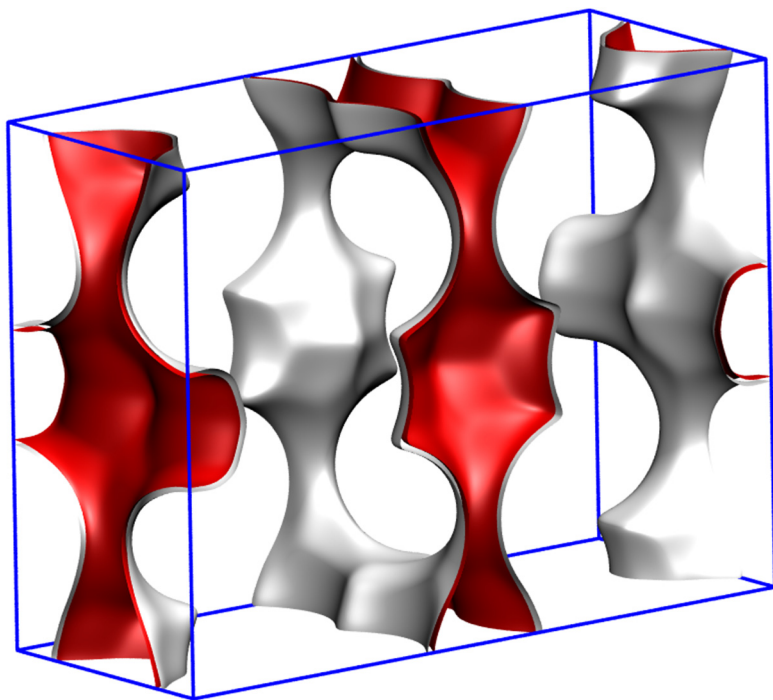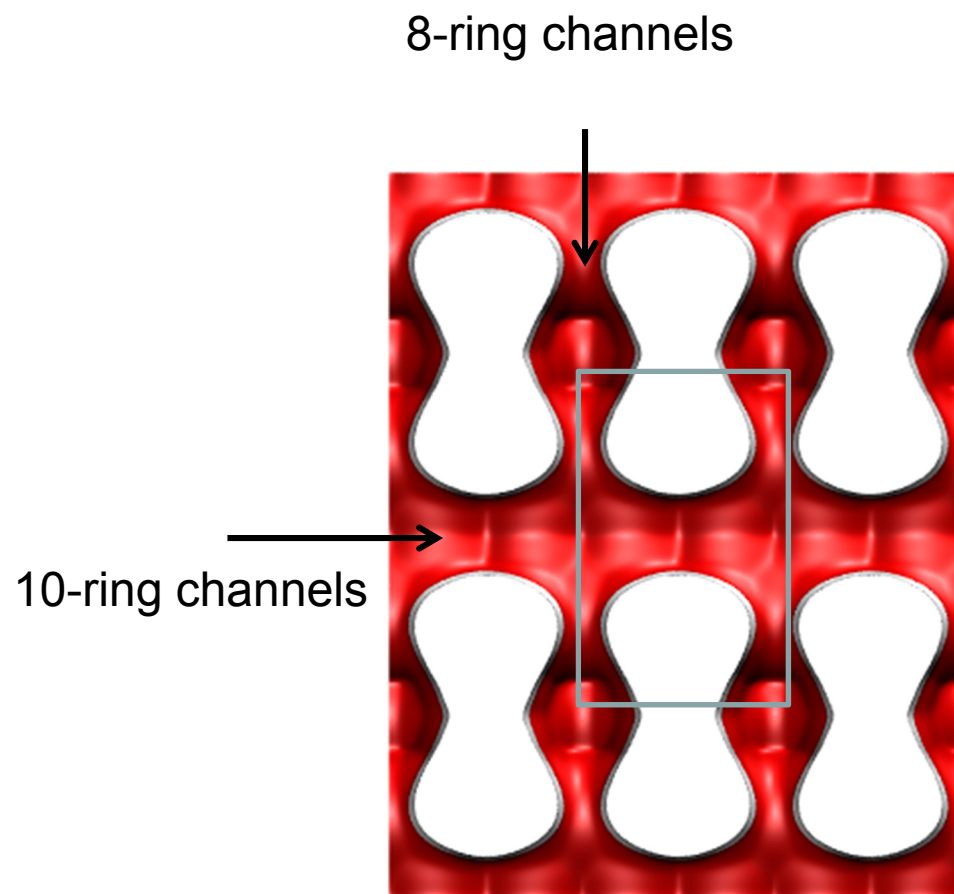

This is one unit cell

There are two 10-ring channels  
There are two 8-ring channels

Structural information from: C. Baerlocher, L.B. McCusker, Database of Zeolite Structures, International Zeolite Association, <http://www.iza-structure.org/databases/>

# FER pore landscape

10-ring channels

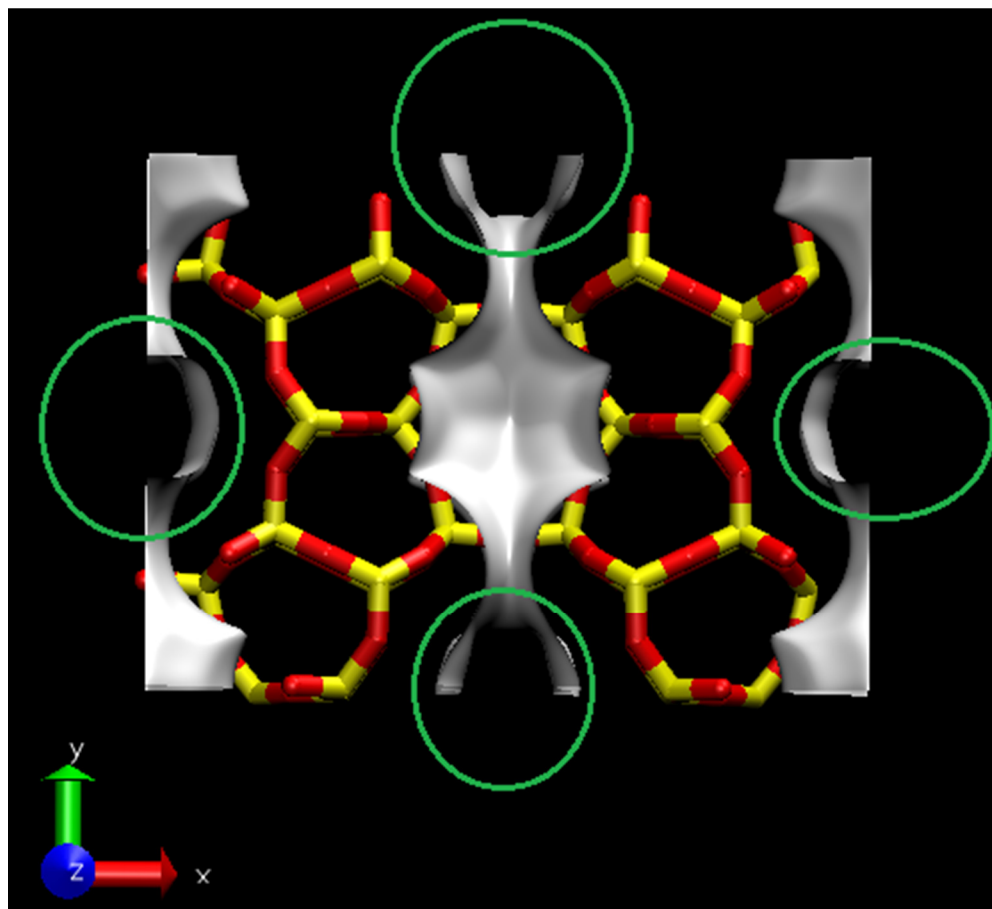

8-ring channels

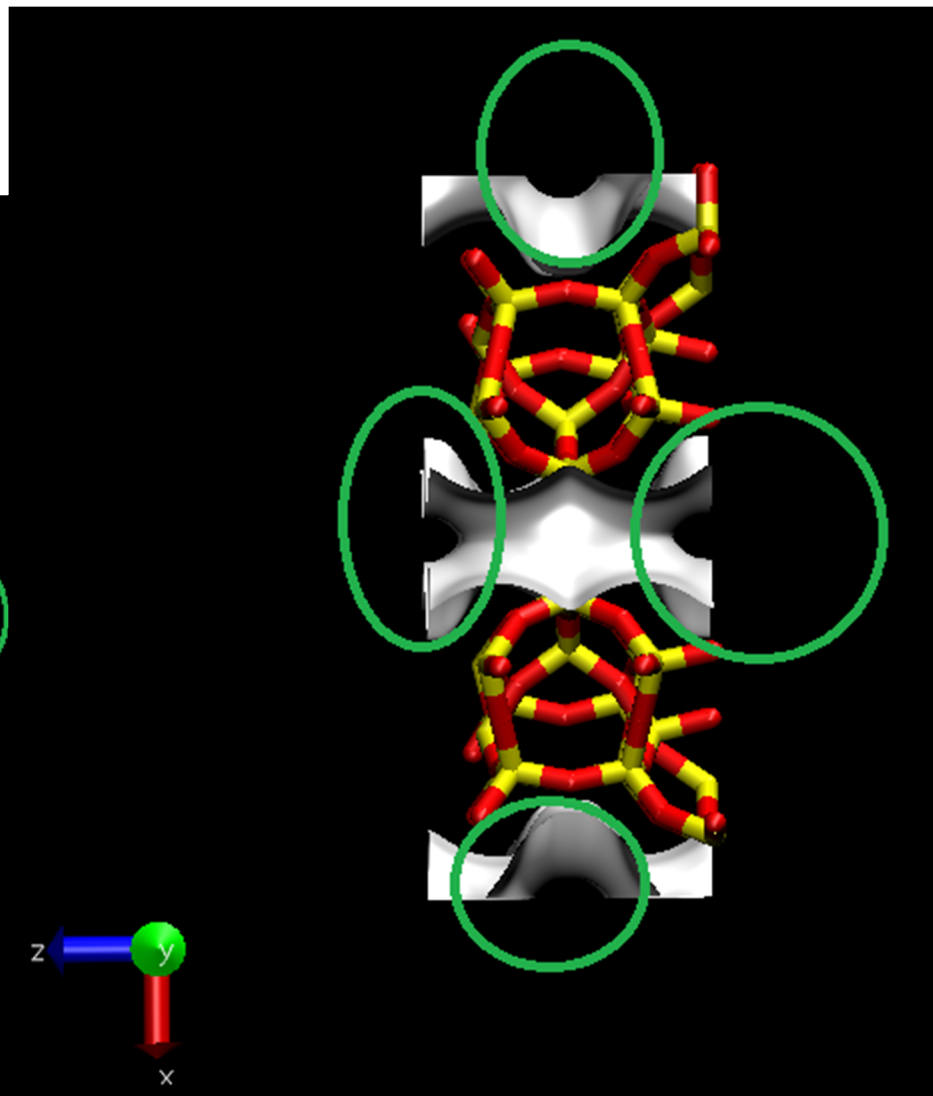

# FER pore dimensions

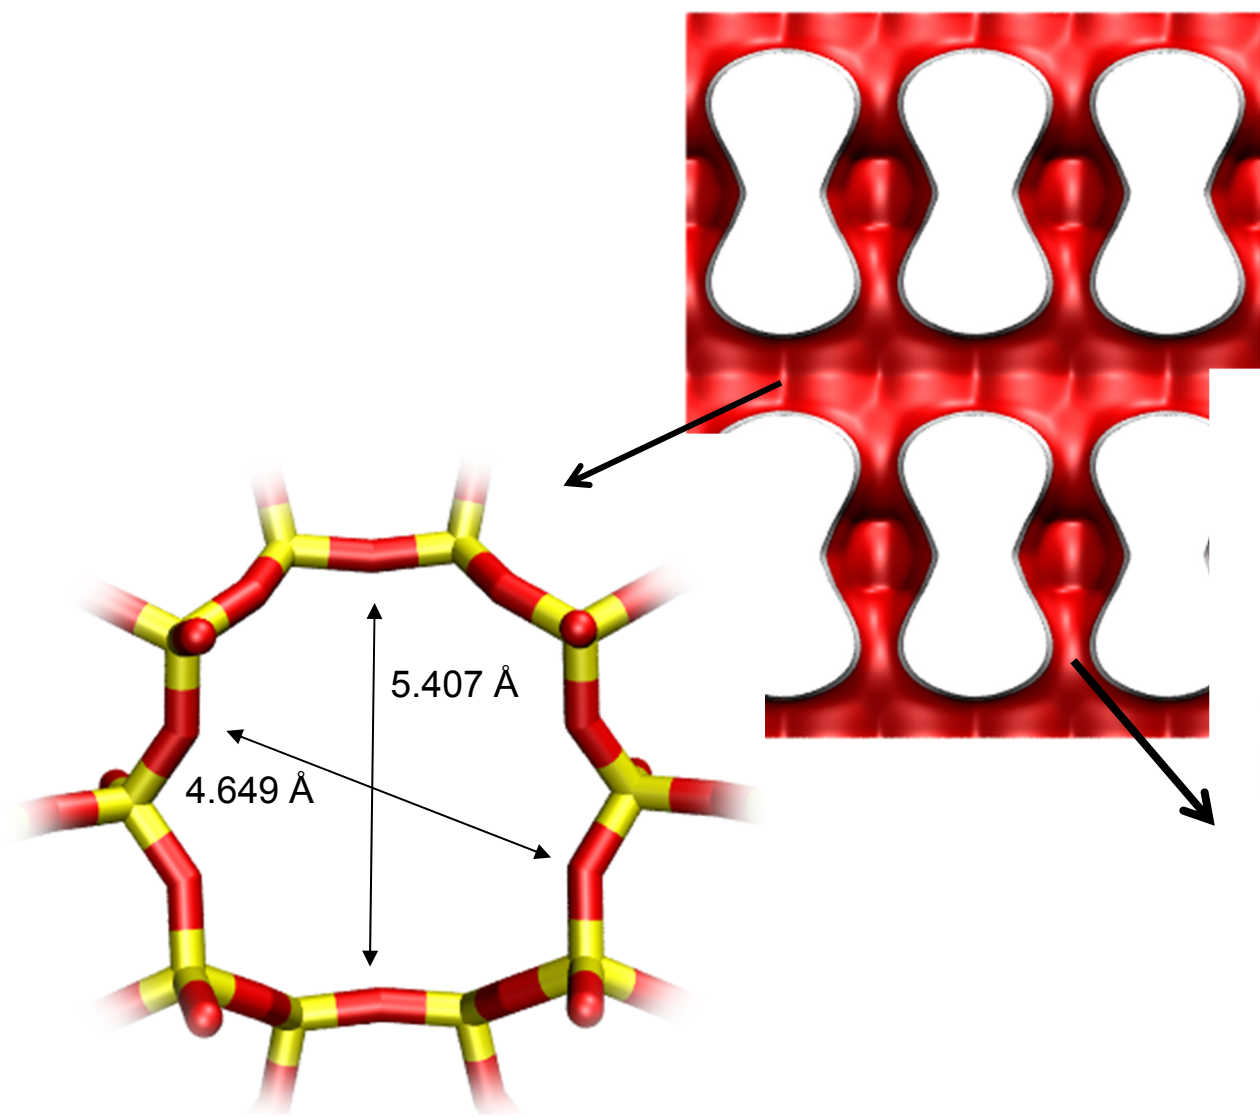

FER channel [0 0 1]

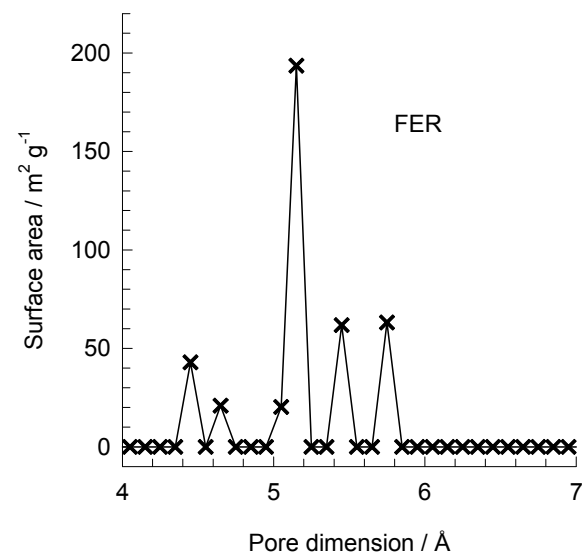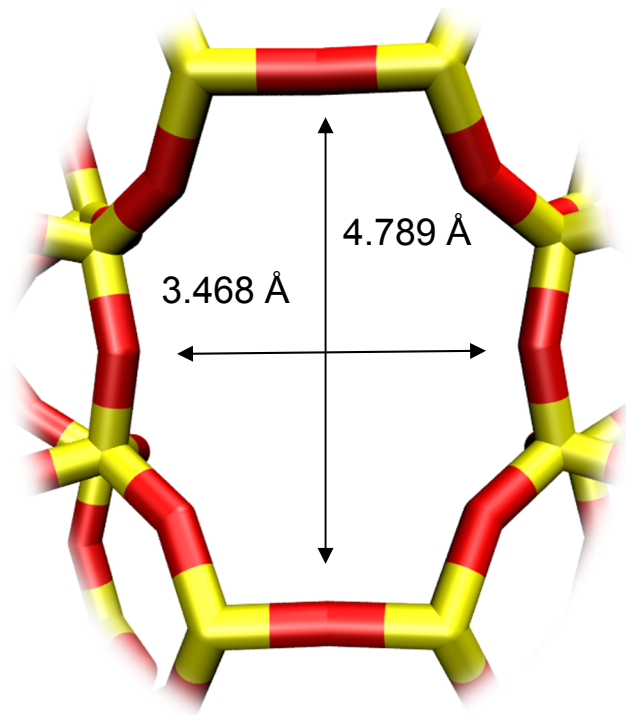

FER [0 1 0]

# FER pore landscape

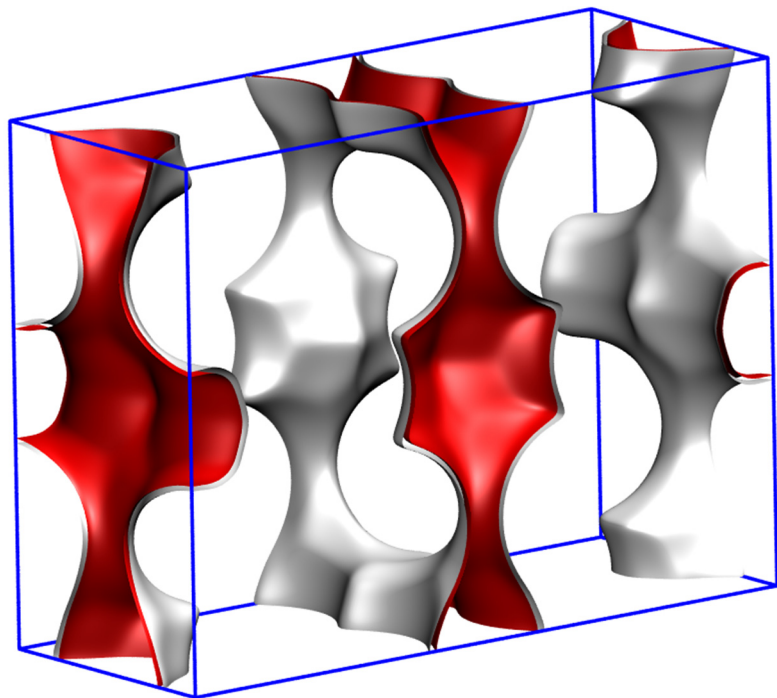

|                                                            | FER      |
|------------------------------------------------------------|----------|
| $a / \text{\AA}$                                           | 19.156   |
| $b / \text{\AA}$                                           | 14.127   |
| $c / \text{\AA}$                                           | 7.489    |
| Cell volume / $\text{\AA}^3$                               | 2026.649 |
| conversion factor for [molec/uc] to [mol per kg Framework] | 0.4623   |
| conversion factor for [molec/uc] to [kmol/m <sup>3</sup> ] | 2.8968   |
| $\rho$ [kg/m <sup>3</sup> ]                                | 1772.33  |
| MW unit cell [g/mol (framework)]                           | 2163.053 |
| $\phi$ , fractional pore volume                            | 0.283    |
| open space / $\text{\AA}^3/\text{uc}$                      | 573.2    |
| Pore volume / cm <sup>3</sup> /g                           | 0.160    |
| Surface area / m <sup>2</sup> /g                           | 403.0    |
| DeLaunay diameter / $\text{\AA}$                           | 4.65     |

# FER CBMC simulations of isotherms, and $-Q_{st}$ ; MD simulations of diffusivities

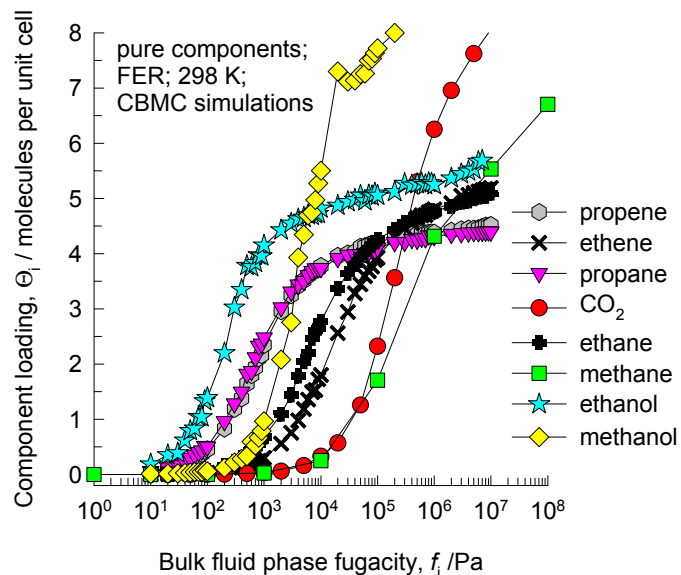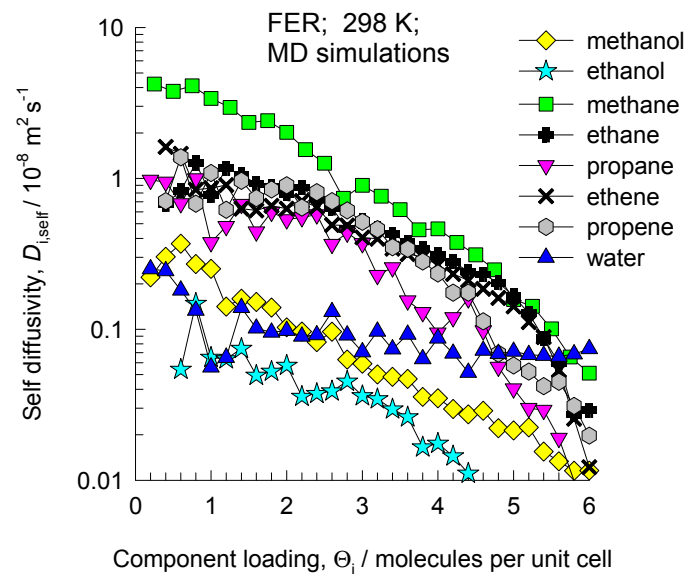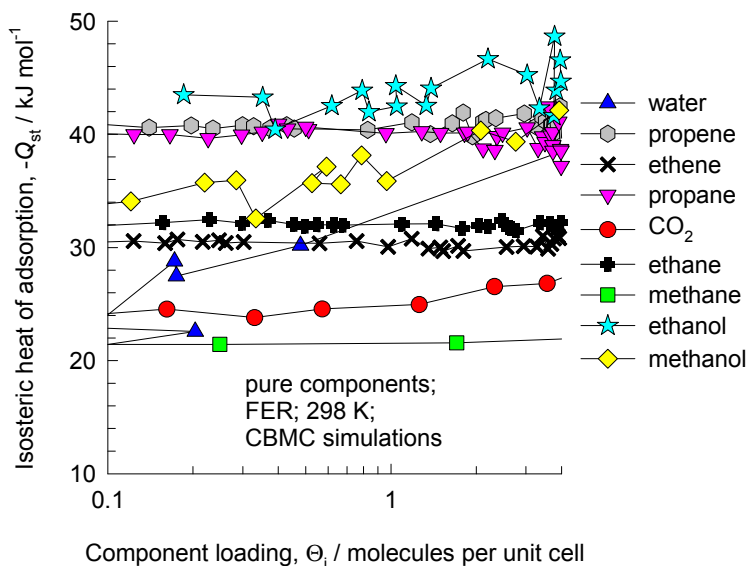

The diffusivities are along the 10-ring channels. The diffusivities in the other directions are too small to monitor accurately with MD.

# ISV pore landscape

## Intersecting 12-ring channels structure

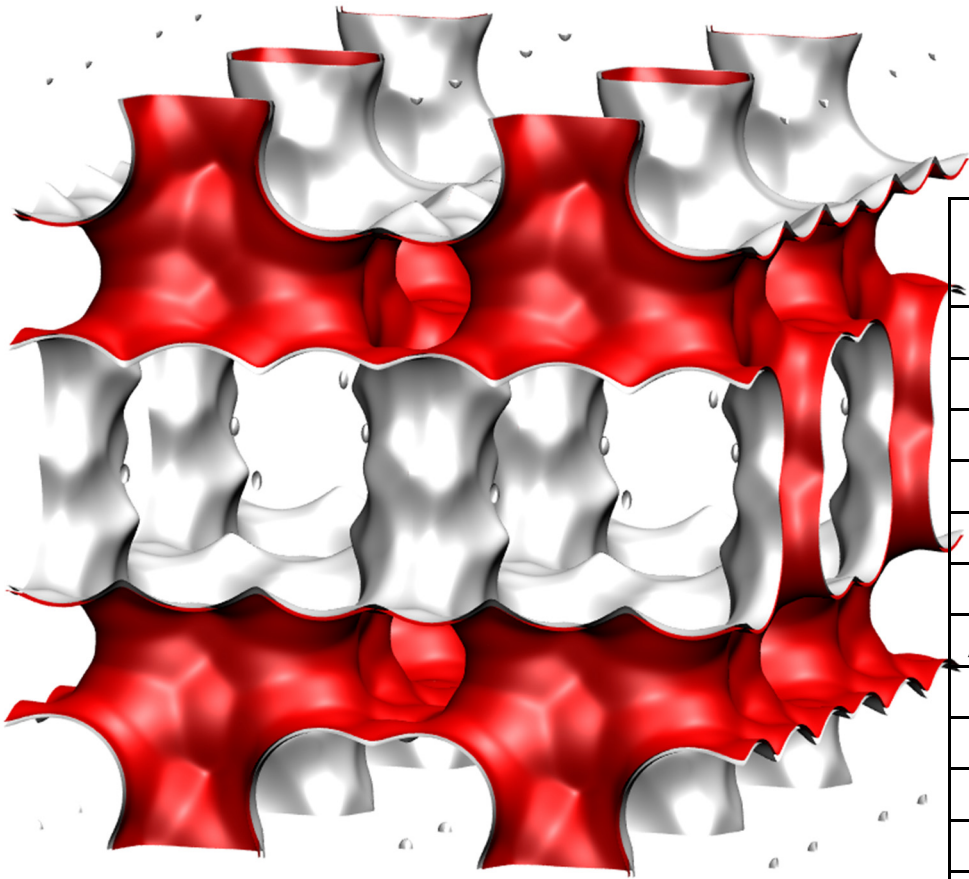

|                                                            | ISV      |
|------------------------------------------------------------|----------|
| <i>a</i> /Å                                                | 12.853   |
| <i>b</i> /Å                                                | 12.853   |
| <i>c</i> /Å                                                | 25.214   |
| Cell volume / Å <sup>3</sup>                               | 4165.343 |
| conversion factor for [molec/uc] to [mol per kg Framework] | 0.2600   |
| conversion factor for [molec/uc] to [kmol/m <sup>3</sup> ] | 0.9361   |
| $\rho$ [kg/m <sup>3</sup> ]                                | 1533.027 |
| MW unit cell [g/mol(framework)]                            | 3845.427 |
| $\phi$ , fractional pore volume                            | 0.426    |
| open space / Å <sup>3</sup> /uc                            | 1773.9   |
| Pore volume / cm <sup>3</sup> /g                           | 0.278    |
| Surface area /m <sup>2</sup> /g                            | 911.0    |
| DeLaunay diameter /Å                                       | 5.96     |

Structural information from: C. Baerlocher, L.B. McCusker, Database of Zeolite Structures, International Zeolite Association, <http://www.iza-structure.org/databases/>

# ISV pore dimensions

This plot of surface area versus pore dimension is determined using a combination of the DeLaunay triangulation method for pore dimension determination, and the procedure of Dürren for determination of the surface area.

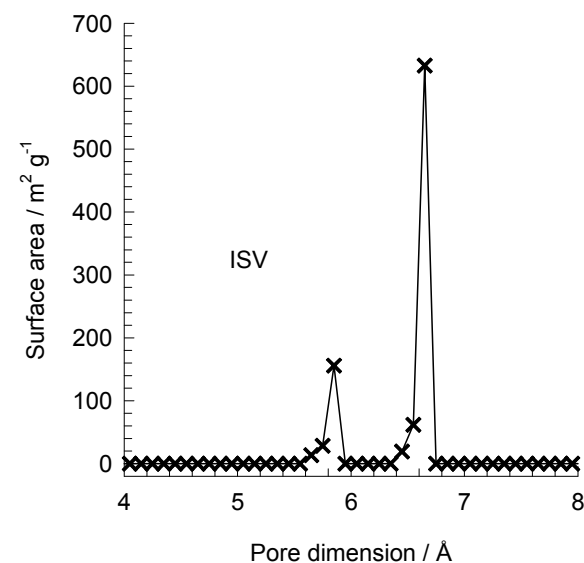

## Intersecting 12-ring channels structure

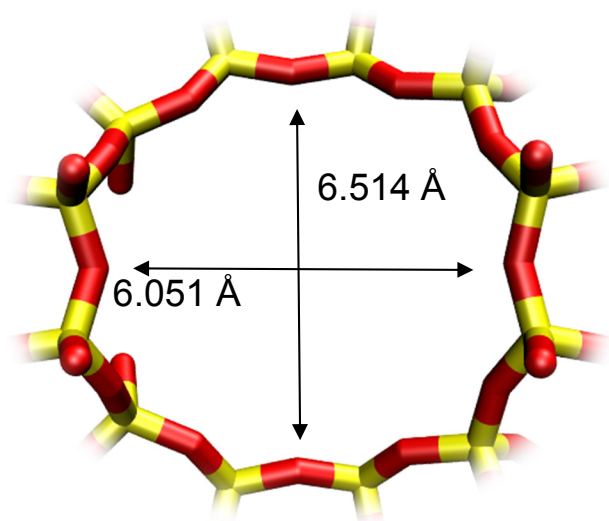

ISV [1 0 0]

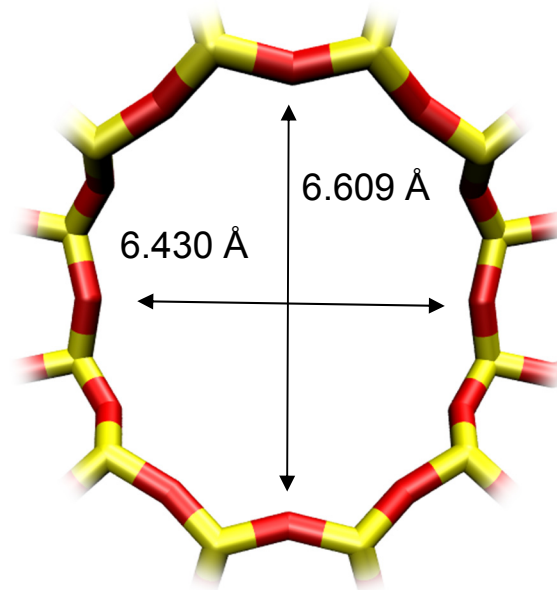

ISV [0 0 1]

## Influence of Inverse Thermodynamic Factor on diffusivities

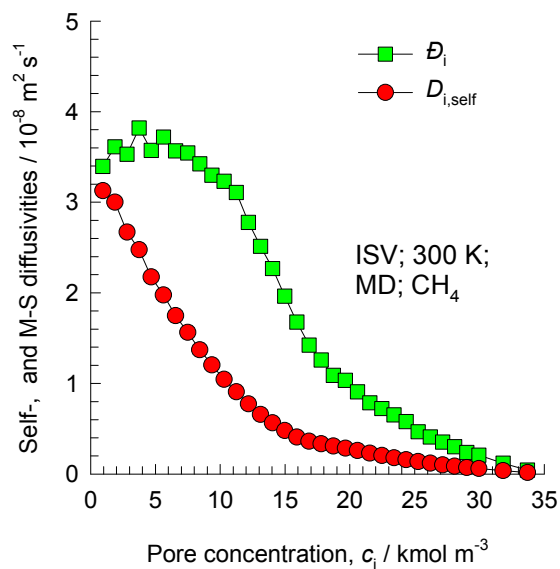

A detailed analysis of the loading dependence of CH<sub>4</sub> in ISV is contained in

E. Beerdsen, D. Dubbeldam and B. Smit, J Phys Chem B, 2006, 110, 22754-22772.

E. Beerdsen, D. Dubbeldam and B. Smit, Phys. Rev. Lett., 2006, 96, 044501.

# MFI pore landscape

|                                                            | MFI      |
|------------------------------------------------------------|----------|
| <i>a</i> /Å                                                | 20.022   |
| <i>b</i> /Å                                                | 19.899   |
| <i>c</i> /Å                                                | 13.383   |
| Cell volume / Å <sup>3</sup>                               | 5332.025 |
| conversion factor for [molec/uc] to [mol per kg Framework] | 0.1734   |
| conversion factor for [molec/uc] to [kmol/m <sup>3</sup> ] | 1.0477   |
| $\rho$ [kg/m <sup>3</sup> ]                                | 1796.386 |
| MW unit cell [g/mol(framework)]                            | 5768.141 |
| $\phi$ , fractional pore volume                            | 0.297    |
| open space / Å <sup>3</sup> /uc                            | 1584.9   |
| Pore volume / cm <sup>3</sup> /g                           | 0.165    |
| Surface area /m <sup>2</sup> /g                            | 487.0    |
| DeLaunay diameter /Å                                       | 5.16     |

Structural information from: C. Baerlocher, L.B. McCusker,  
Database of Zeolite Structures, International Zeolite Association,  
<http://www.iza-structure.org/databases/>

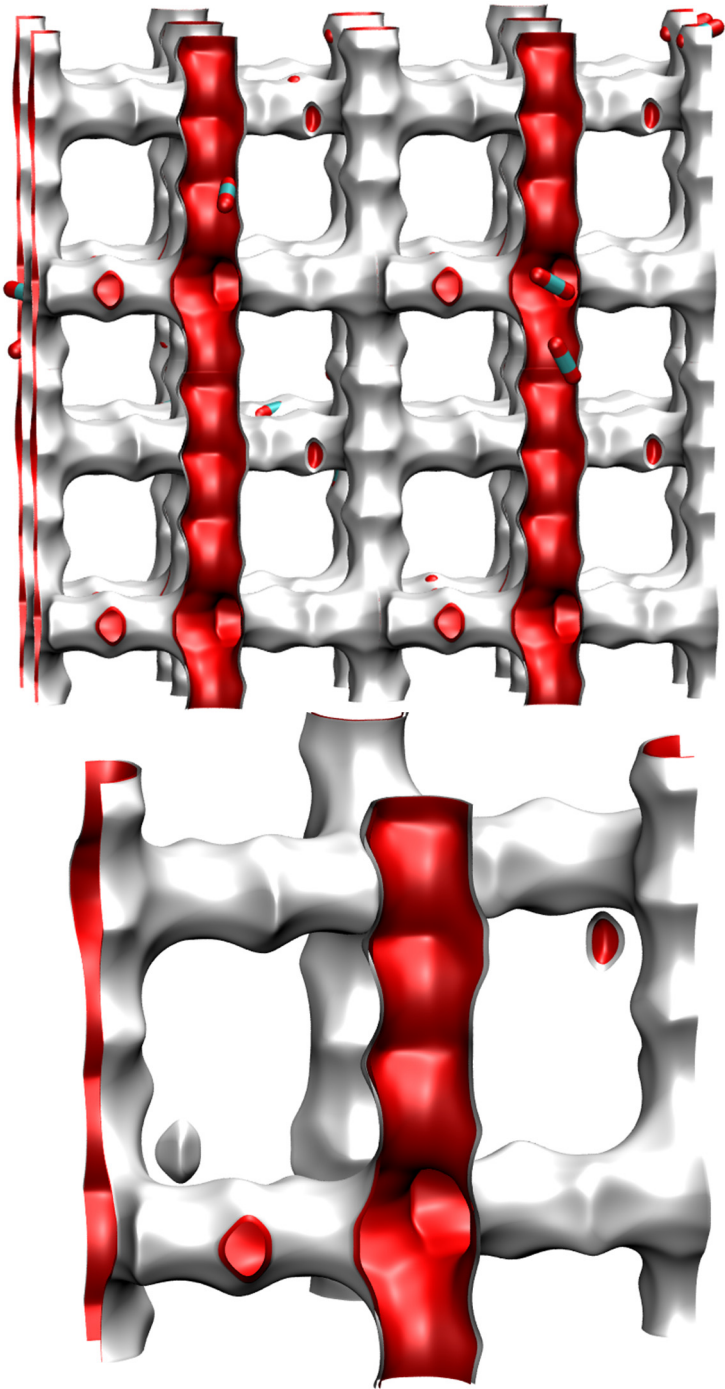

# MFI pore dimensions

10 ring channel  
of MFI viewed  
along [100]

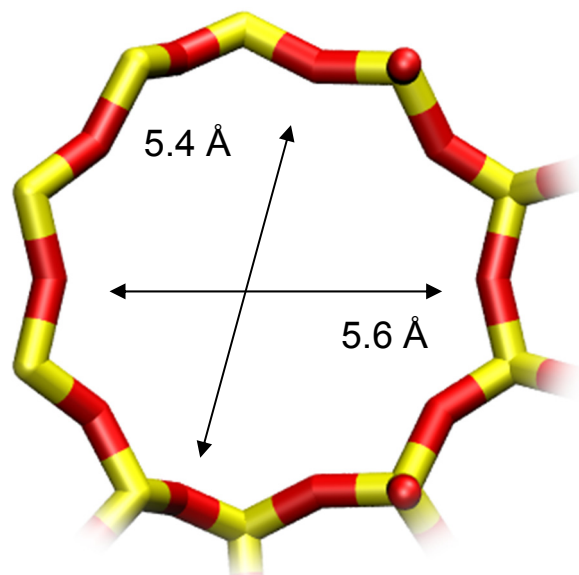

10 ring channel  
of MFI viewed  
along [010]

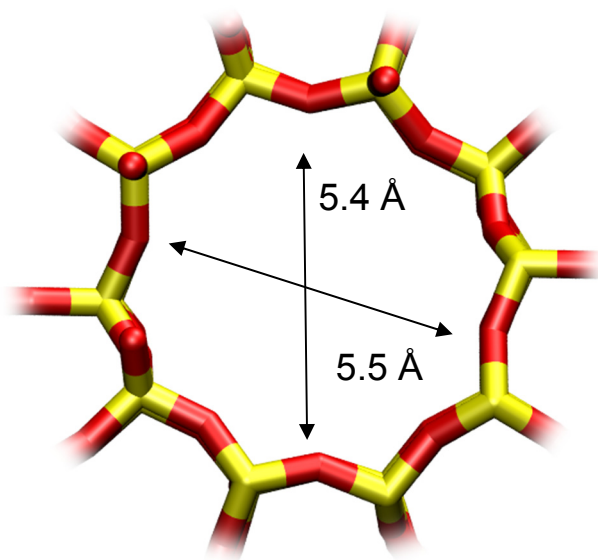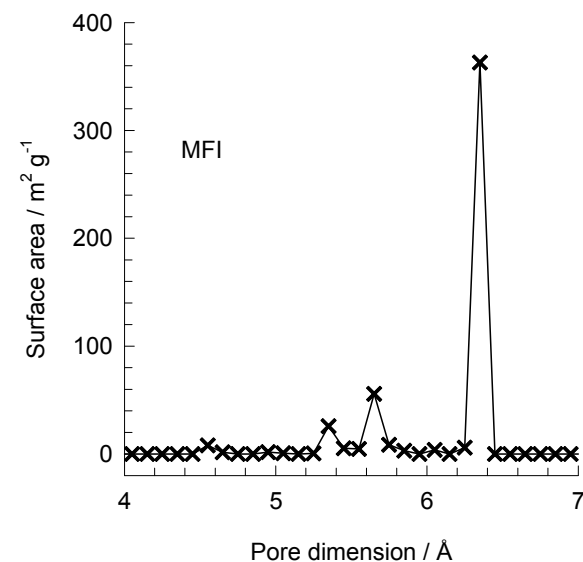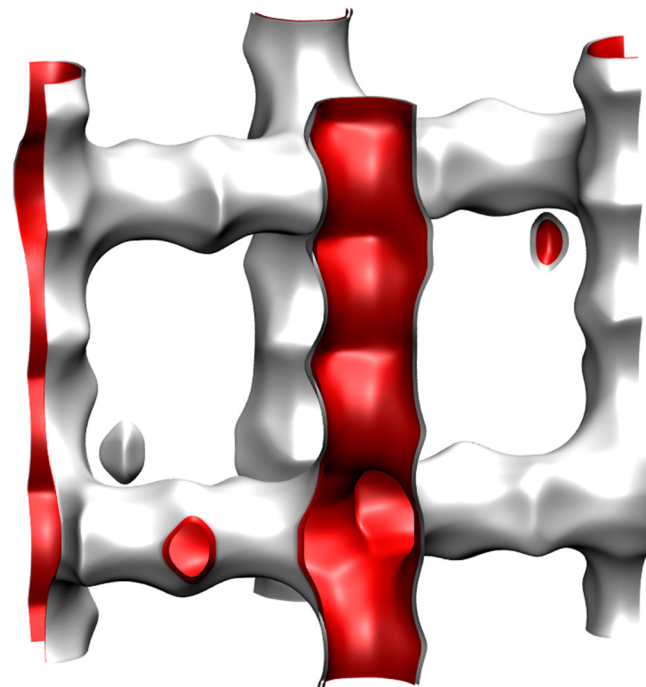

# MFI CBMC simulations of isotherms, and isosteric heats of adsorption

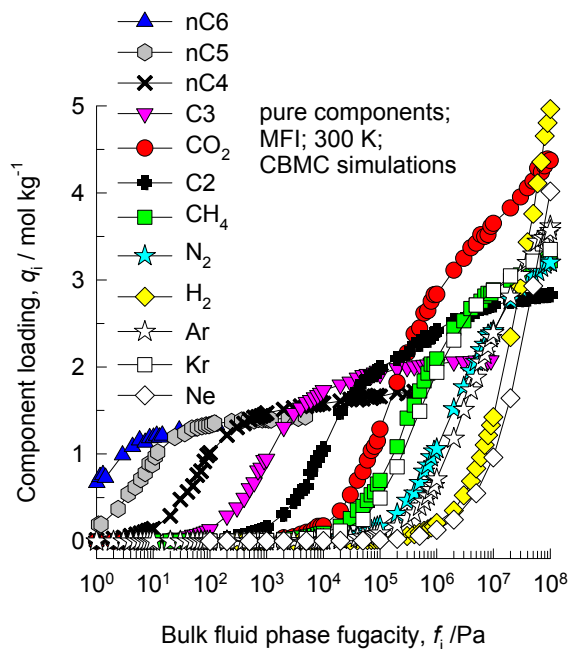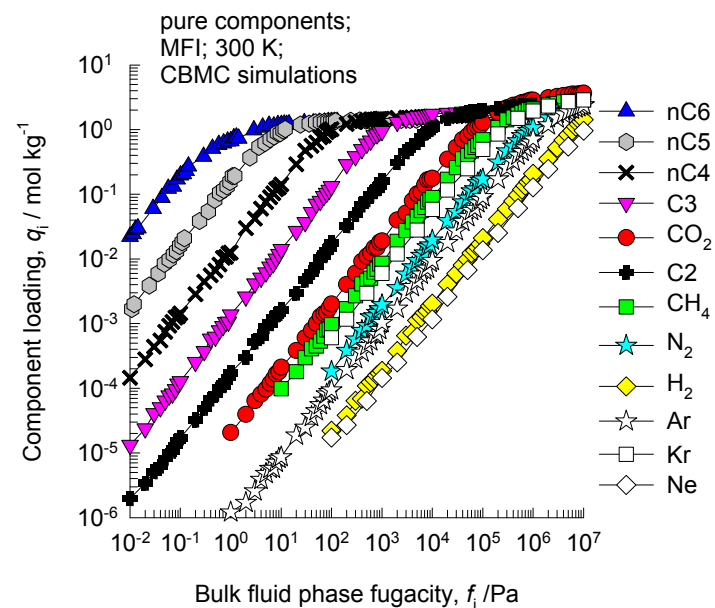

Note that C2 and C3 above refer to saturated alkanes

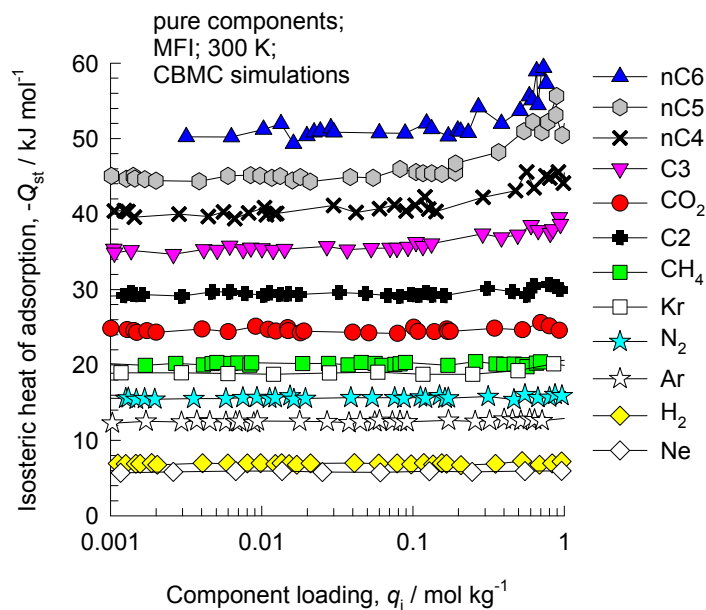

# Influence of Inverse Thermodynamic Factor on diffusivities

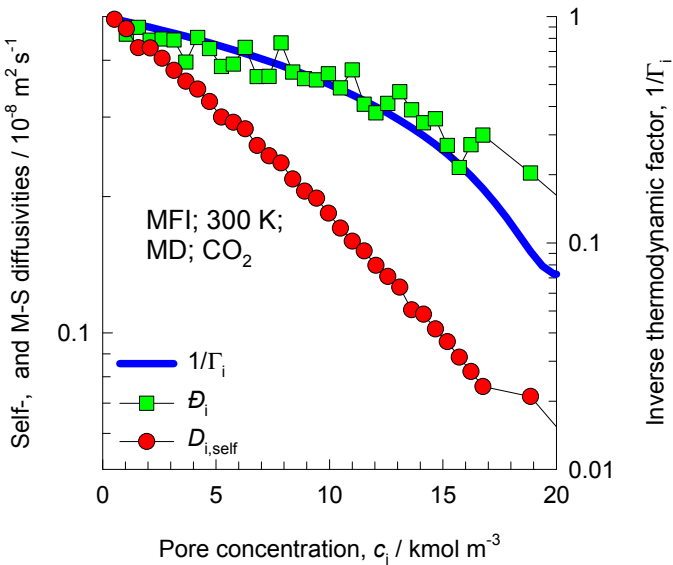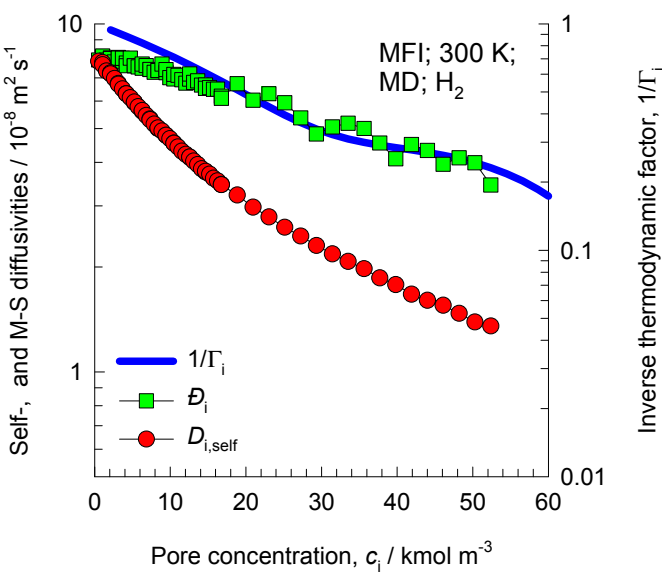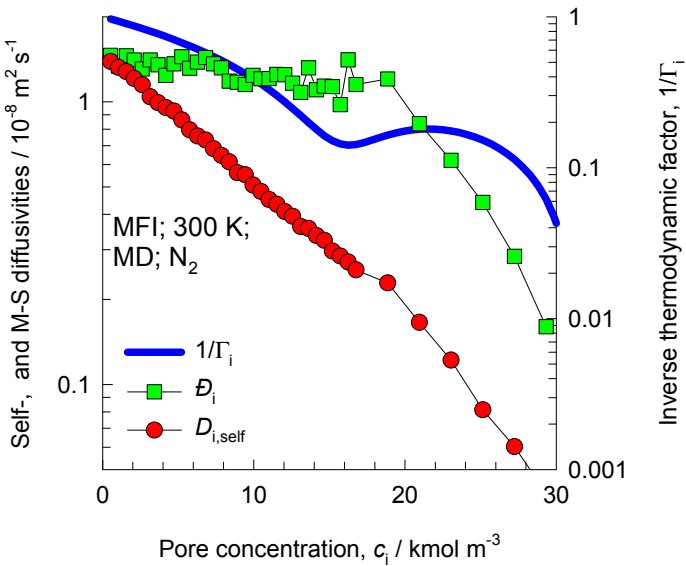

# Influence of Inverse Thermodynamic Factor on diffusivities

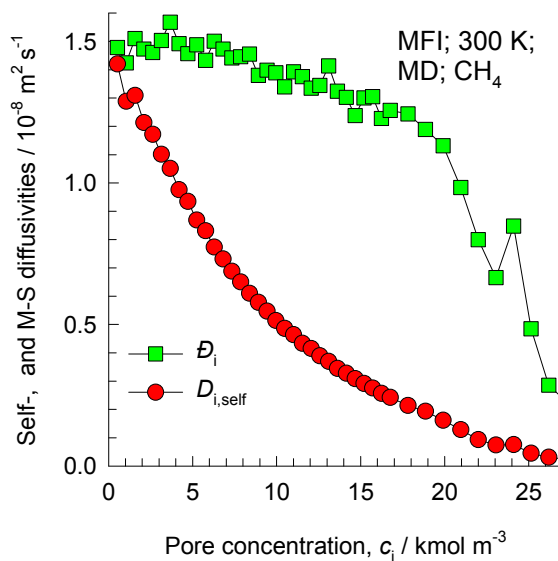

A detailed analysis of the loading dependence of  $\text{CH}_4$  in MFI is contained in

E. Beerdsen, D. Dubbeldam and B. Smit, *Phys. Rev. Lett.*, 2005, **95**, 164505.

E. Beerdsen, D. Dubbeldam and B. Smit, *J Phys Chem B*, 2006, **110**, 22754-22772.

E. Beerdsen, D. Dubbeldam and B. Smit, *Phys. Rev. Lett.*, 2006, **96**, 044501.

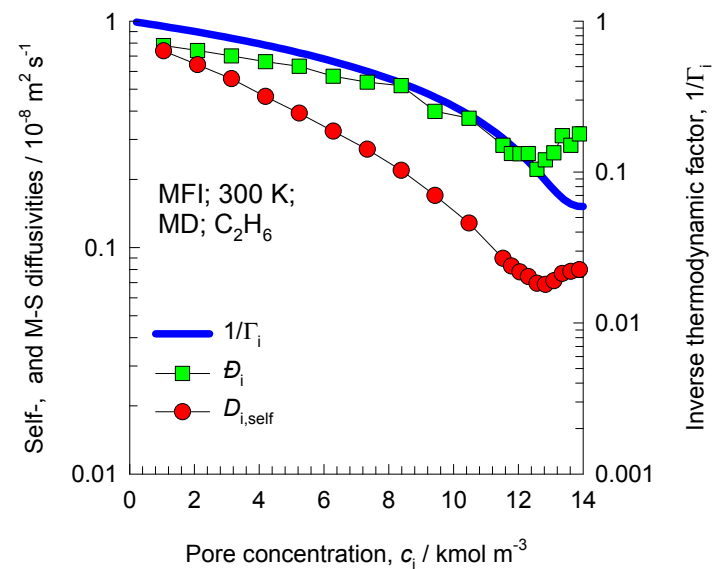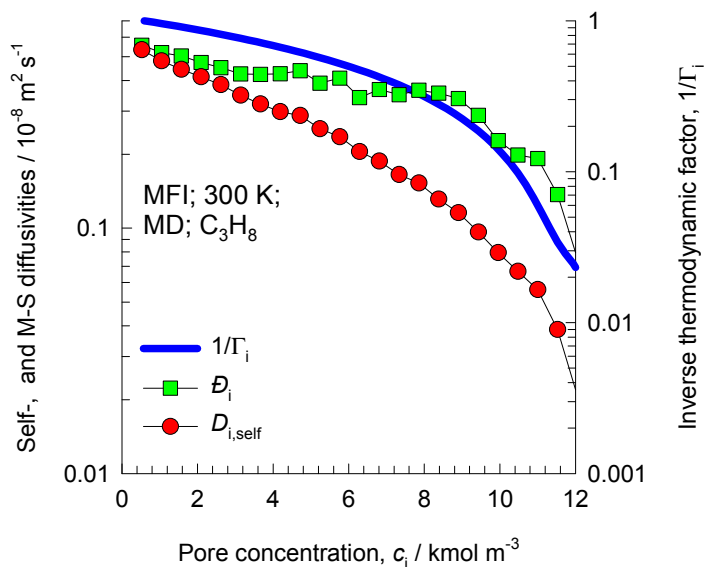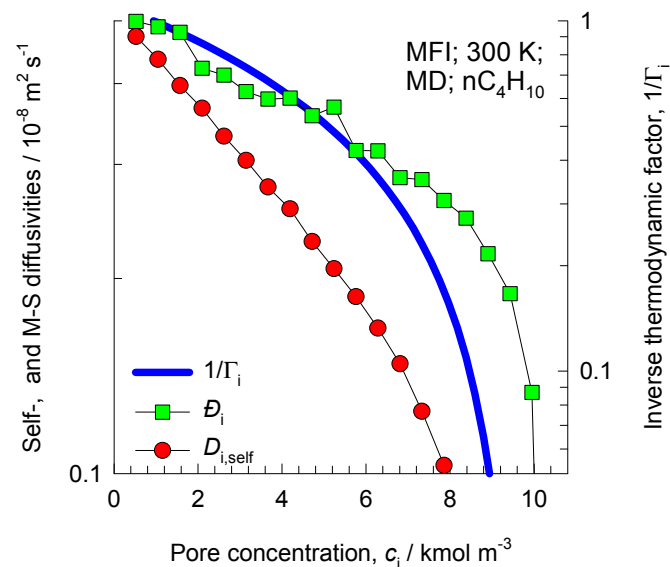

## Influence of Inverse Thermodynamic Factor on diffusivities

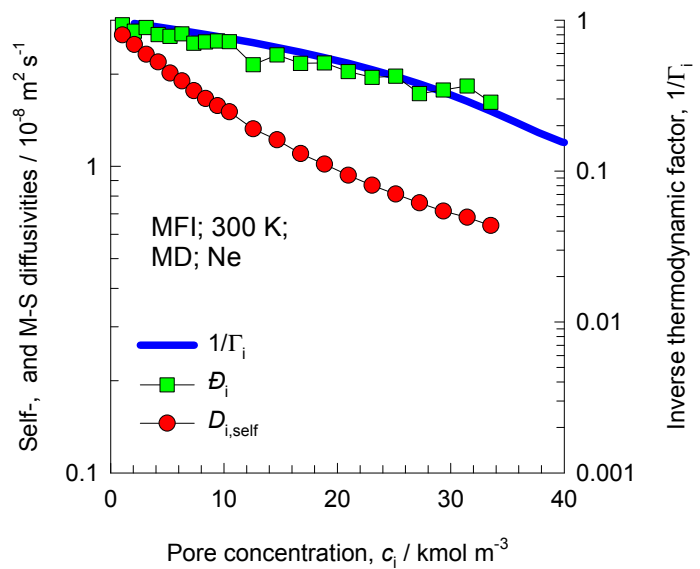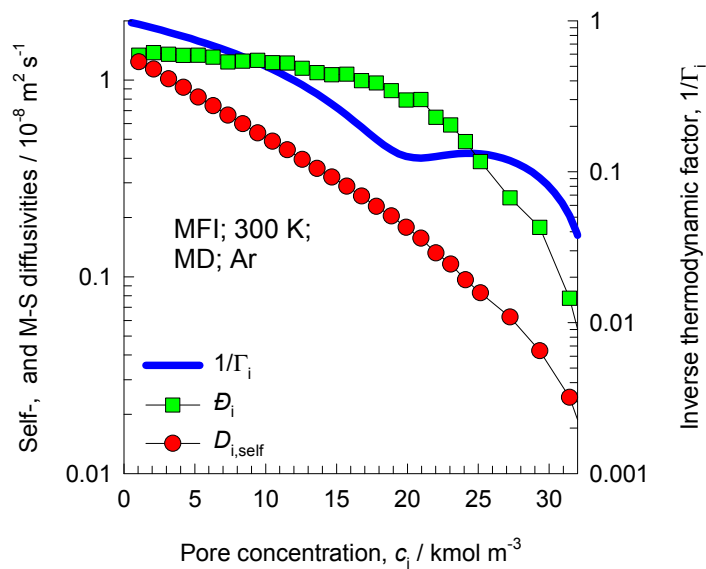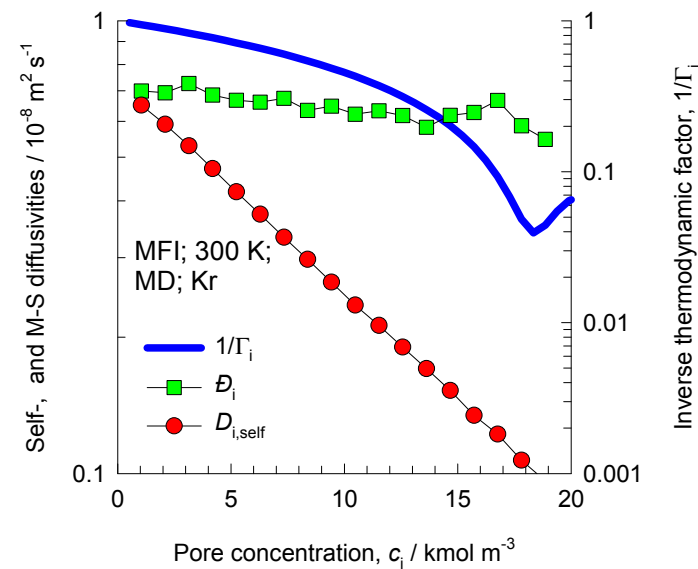

## nC6 diffusivity in MFI zeolite

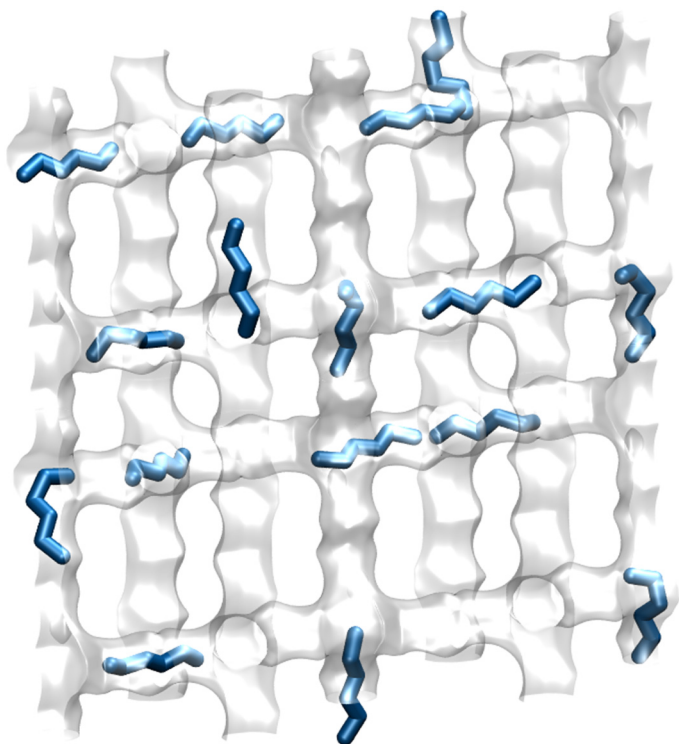

Linear, chain, alkanes can locate anywhere along the channels of MFI. The length of nC6 is commensurate with the distance between two intersections

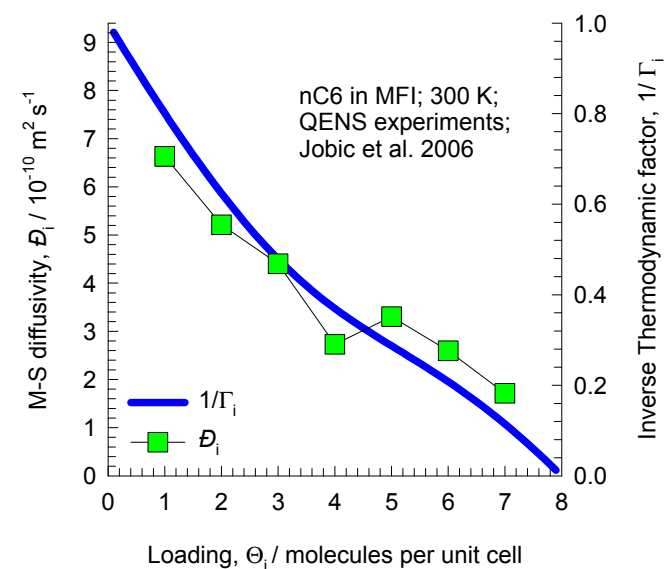

The QENS experimental data are re-plotted using the information in:

H. Jobic, C. Laloué, C. Laroche, J.M. van Baten, R. Krishna, Influence of isotherm inflection on the loading dependence of the diffusivities of n-hexane and n-heptane in MFI zeolite. Quasi-Elastic Neutron Scattering experiments supplemented by molecular simulations, J. Phys. Chem. B 110 (2006) 2195-2201.

## nC7 diffusivity in MFI zeolite

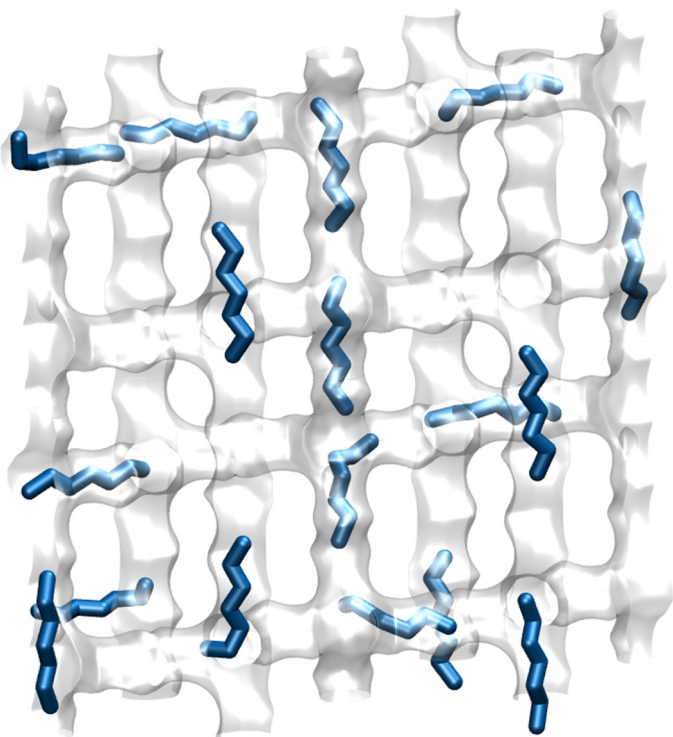

The length of nC7 is not commensurate with the distance between two intersections

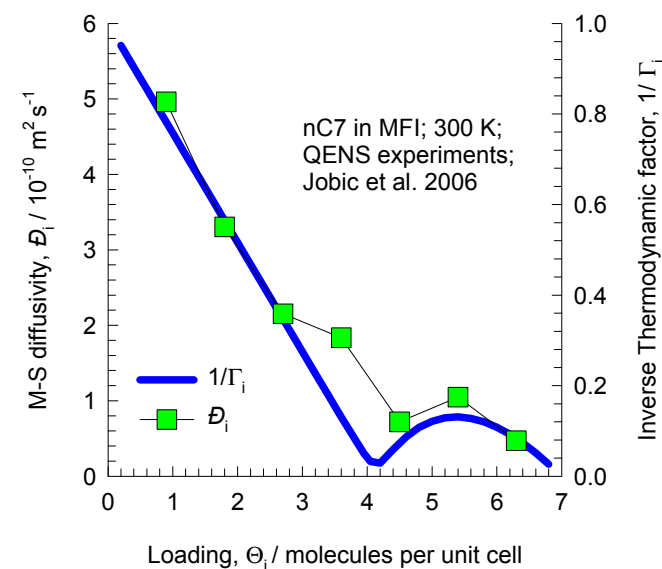

The QENS experimental data are re-plotted using the information in:

H. Jobic, C. Laloué, C. Laroche, J.M. van Baten, R. Krishna, Influence of isotherm inflection on the loading dependence of the diffusivities of n-hexane and n-heptane in MFI zeolite. Quasi-Elastic Neutron Scattering experiments supplemented by molecular simulations, J. Phys. Chem. B 110 (2006) 2195-2201.

## Benzene diffusivity in MFI zeolite

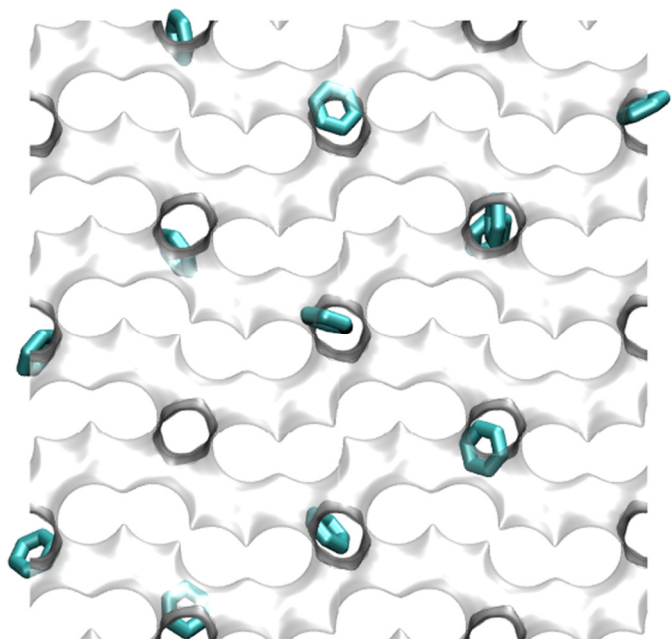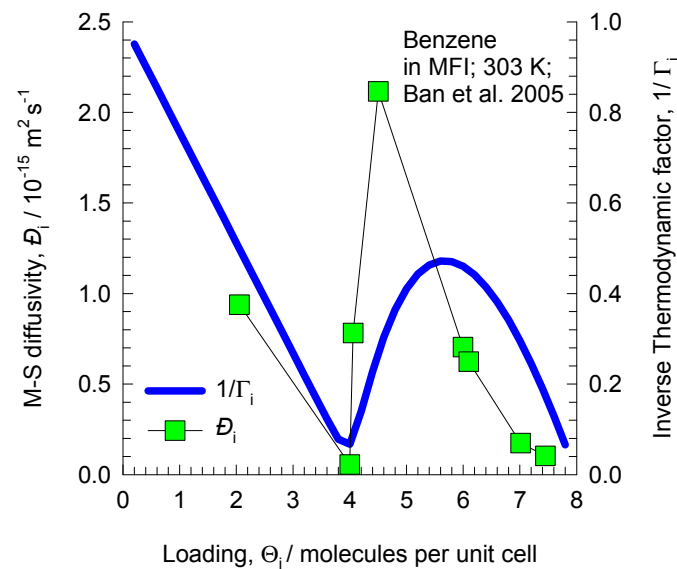

The experimental data are re-plotted after converting Fick diffusivities to Maxwell-Stefan diffusivities using:

Ban, H.; Gui, J.; Duan, L.; Zhang, X.; Song, L.; Sun, Z. Sorption of hydrocarbons in silicalite-1 studied by intelligent gravimetry. *Fluid Phase Equilib.* 2005, 232, 149-158.

## MFI: Traffic junction effects for nC4/iC4 mixture diffusion

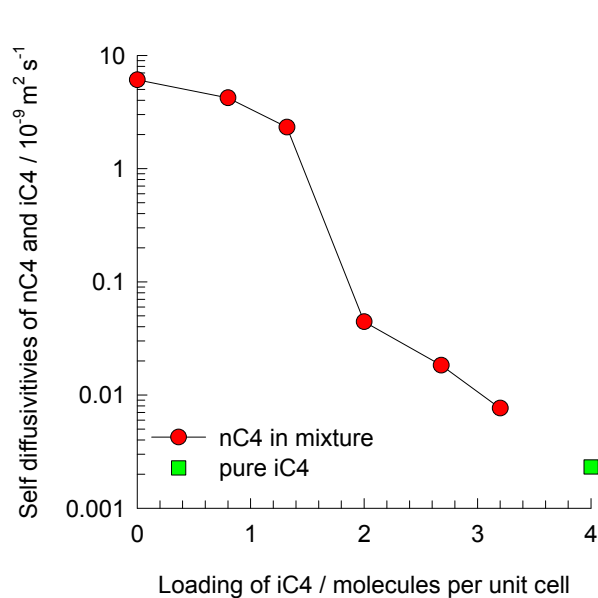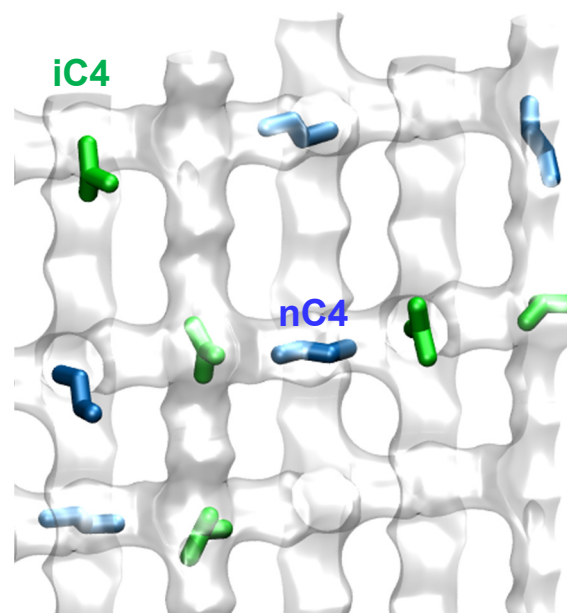

The experimental data are re-plotted using the data of:

Fernandez, M.; Kärger, J.; Freude, D.; Pampel, A.; van Baten, J. M.; Krishna, R. Mixture diffusion in zeolites studied by MAS PFG NMR and molecular simulation, *Microporous Mesoporous Mater.* 2007, 105, 124-131.

## MFI: Traffic junction effects for CH<sub>4</sub>/Benzene mixture diffusion

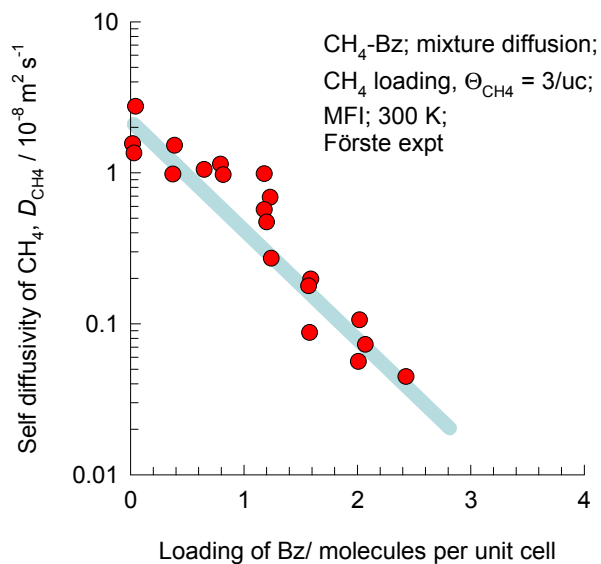

The experimental data are re-plotted using the data of:

Förste, C.; Germanus, A.; Kärger, J.; Pfeifer, H.; Caro, J.; Pilz, W.; Zikánová, A. Molecular mobility of methane adsorbed in ZSM-5 containing co-adsorbed benzene, and the location of benzene molecules, J. Chem. Soc., Faraday Trans. 1. 1987, 83, 2301-2309.

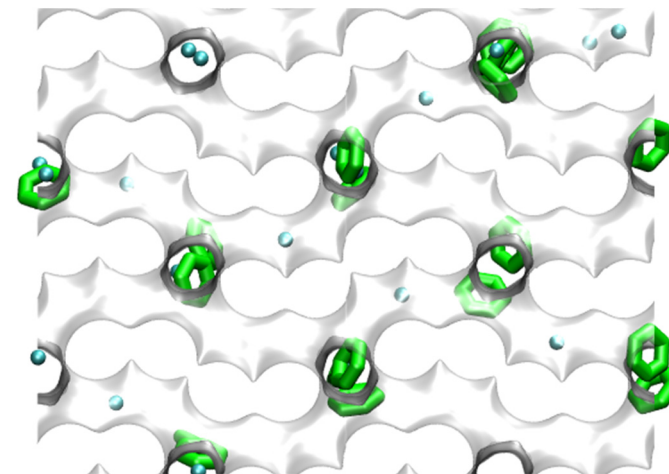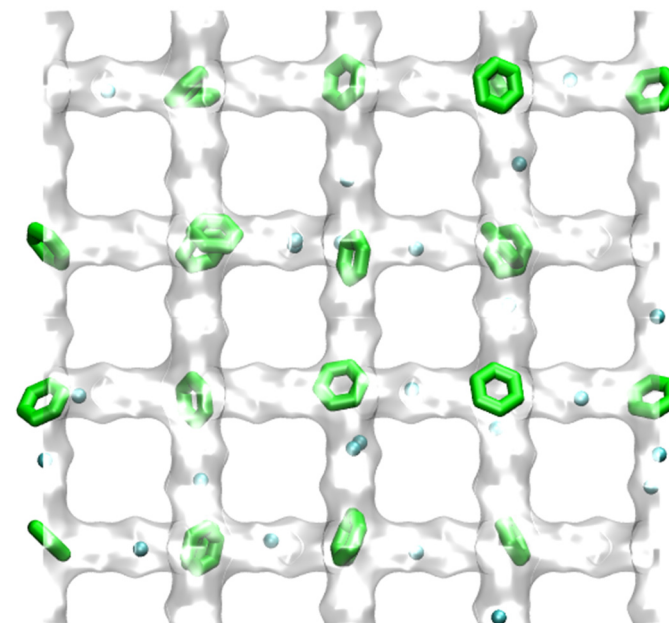

## MFI: Traffic junction effects for nC6/2MP mixture diffusion

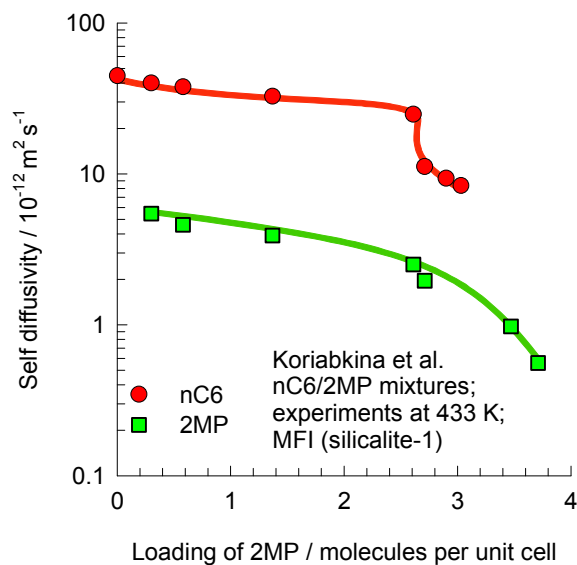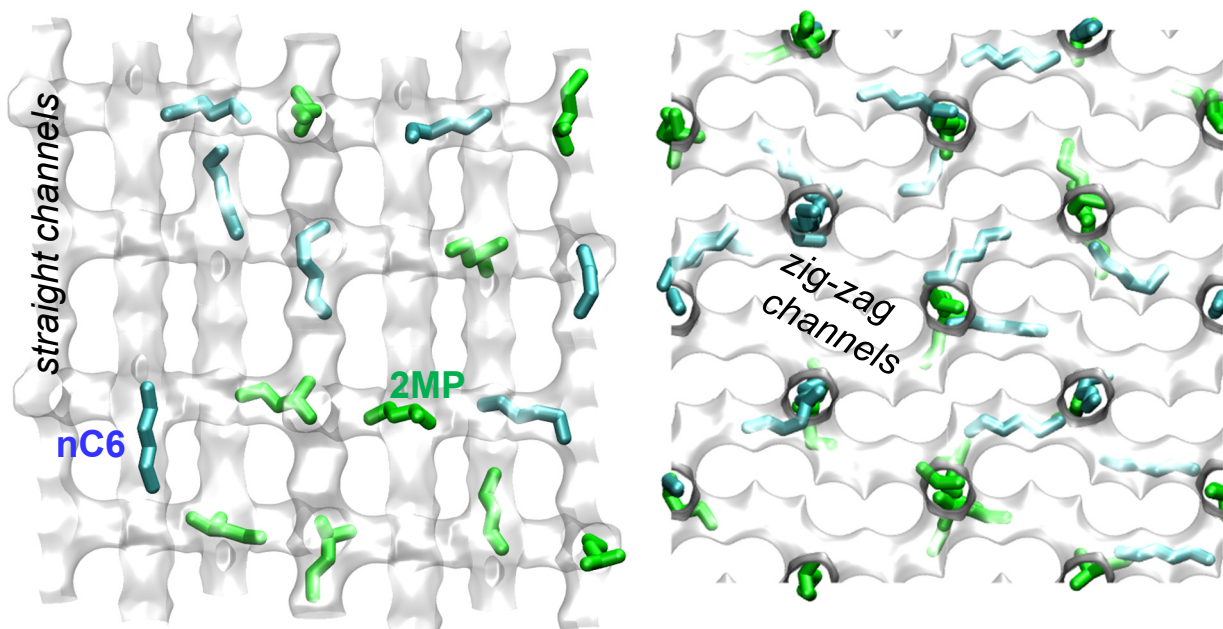

The experimental data are re-plotted using the data of:

Koriabkina, A. O.; de Jong, A. M.; Schuring, D.; van Grondelle, J.; van Santen, R. A. Influence of the acid sites on the intracrystalline diffusion of hexanes and their mixtures within MFI-zeolites, J. Phys. Chem. B 2002, 106, 9559-9566.

# Zn(bdc)dabco landscapes

The structural information for  $\text{Zn(bdc)(dabco)}_{0.5}$ , commonly simply referred to as Zn(bdc)dabco, is from

P.S. Bárcia, F. Zapata, J.A.C. Silva, A.E. Rodrigues, B. Chen, Kinetic Separation of Hexane Isomers by Fixed-Bed Adsorption with a Microporous Metal-Organic Framework, *J. Phys. Chem. B* 111 (2008) 6101-6103.

J.Y. Lee, D.H. Olson, L. Pan, T.J. Emge, J. Li, Microporous Metal–Organic Frameworks with High Gas Sorption and Separation Capacity, *Adv. Funct. Mater.* 17 (2007) 1255-1262.

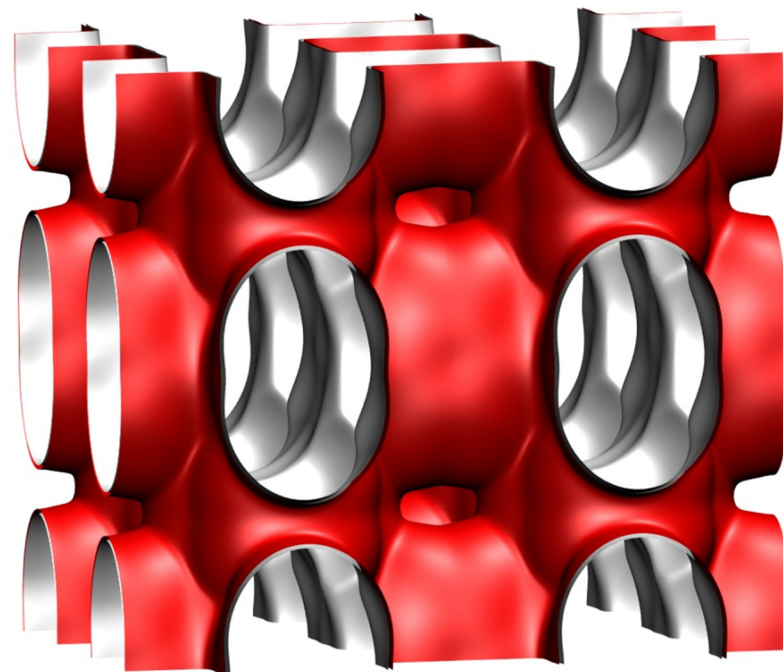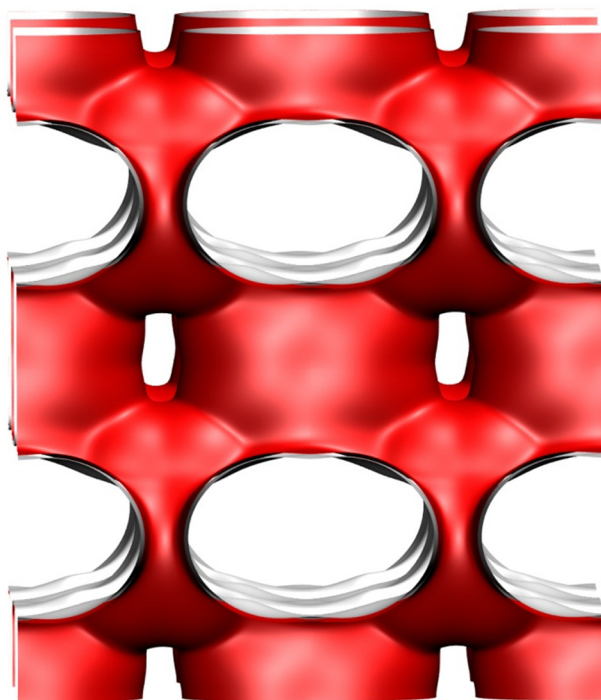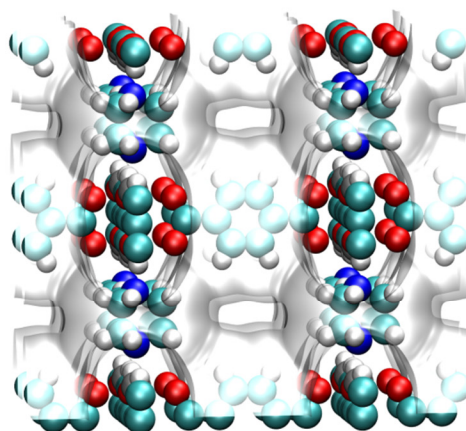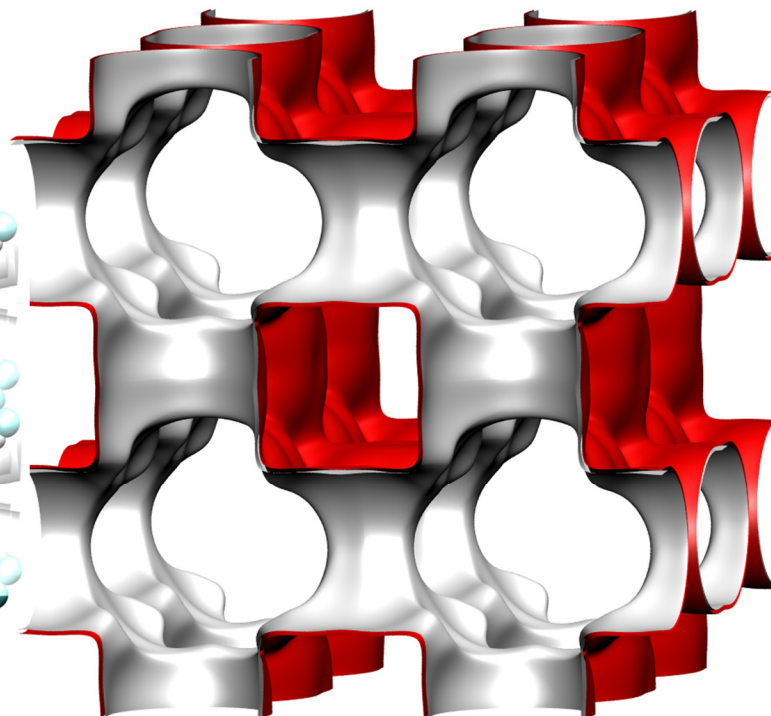

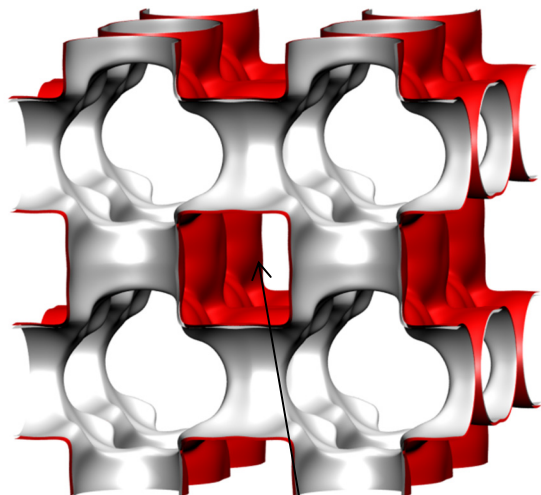

# **Zn(bdc)dabco** landscapes

*3D intersecting channels*

There exist two types of intersecting channels of about  $7.5 \text{ \AA} \times 7.5 \text{ \AA}$  along the x-axis and channels of  $3.8 \text{ \AA} \times 4.7 \text{ \AA}$  along y and z axes.

Wide  
channels

$7.5 \text{ \AA} \times 7.5 \text{ \AA}$

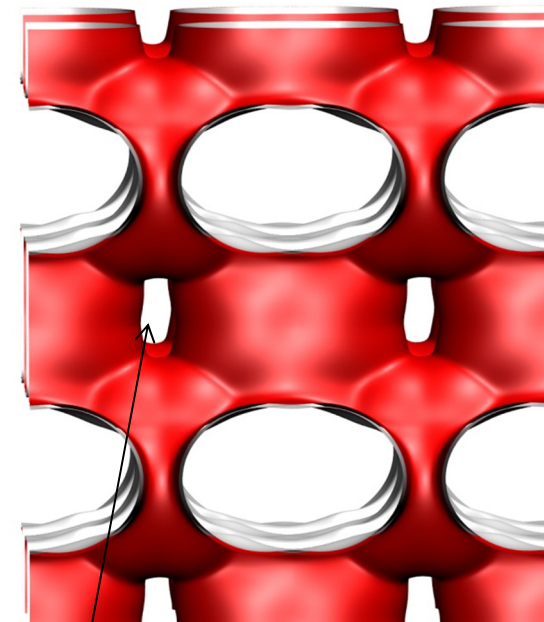

Narrow  
channels

$4.7 \text{ \AA} \times 3.8 \text{ \AA}$

# Zn(bdc)dabco pore dimensions

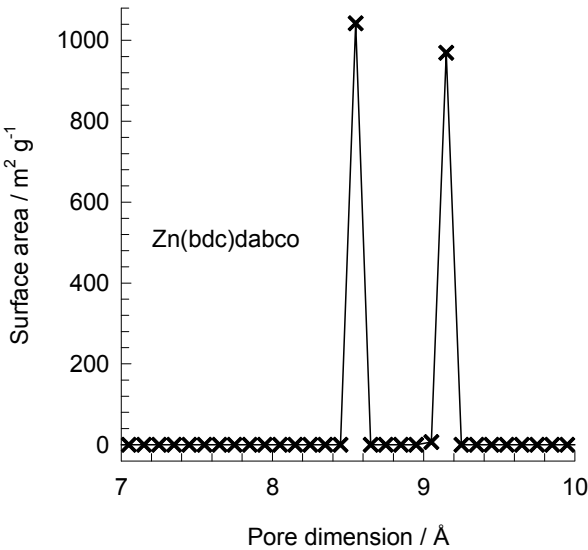

This plot of surface area versus pore dimension is determined using a combination of the DeLaunay triangulation method for pore dimension determination, and the procedure of Dürren for determination of the surface area.

|                                                            |              |
|------------------------------------------------------------|--------------|
|                                                            | Zn(bdc)dabco |
| <i>a</i> / Å                                               | 10.9288      |
| <i>b</i> / Å                                               | 10.9288      |
| <i>c</i> / Å                                               | 9.6084       |
| Cell volume / Å³                                           | 1147.615     |
| conversion factor for [molec/uc] to [mol per kg Framework] | 1.7514       |
| conversion factor for [molec/uc] to [kmol/m³]              | 2.1867       |
| $\rho$ [kg/m3]                                             | 826.1996     |
| MW unit cell [g/mol(framework)]                            | 570.9854     |
| $\phi$ , fractional pore volume                            | 0.662        |
| open space / Å³/uc                                         | 759.4        |
| Pore volume / cm³/g                                        | 0.801        |
| Surface area /m²/g                                         | 2022.5       |
| DeLaunay diameter /Å                                       | 8.32         |

# Influence of Inverse Thermodynamic Factor on diffusivities

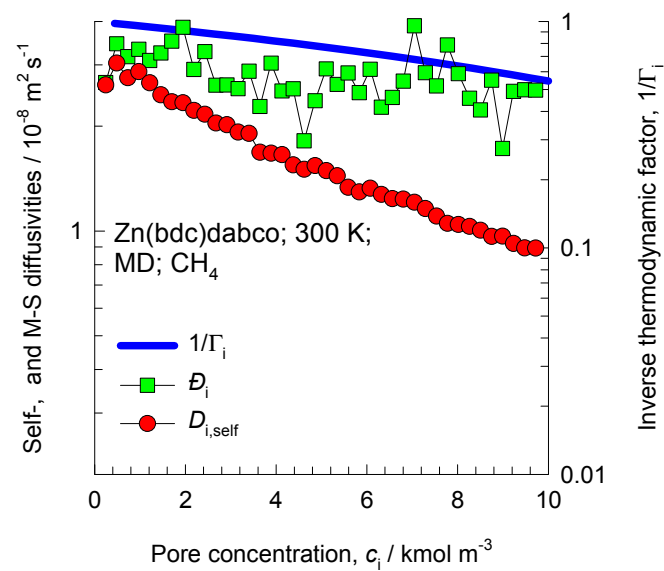

Supplement: c3cp50449b.pdf [file c3cp50449b.pdf]
